# Supplementary material for: Long Non-Coding RNAs in Cryptococcus neoformans: Insights Into Fungal Pathogenesis
Source: Front Cell Infect Microbiol. 2022 Mar 17;12:858317. doi: 10.3389/fcimb.2022.858317 (PMC8968117; doi:10.3389/fcimb.2022.858317)
Supplement: Supplementary file 1 [file Table_1.xlsx]

## Sheet: Table of contents
	Table of Contents
	Sheet name	Description	Reference for dataset
	GffCompare	Gffcompare results characterizing the non-coding RNA class types.	Gff files are from FungiDB.
	RPF_RNA_TE_R1	Ribosome profiling data for both coding and non-coding RNAs. Biological replicate 1 was uilized for the graph in Figure 1.	GSE133125
	RPF_RNA_TE_R2	Ribosome profiling data for both coding and non-coding RNAs. Biological replicate 2. Not included in the analysis. Shows the same trend as replicate 1.	GSE133125
	37_vs_30 RNA-seq	Transcriptome profiling at 30 and 37 Celsius.	GSE121183
	CSF_YPD RNA-seq	Transcriptome profiling in CSF.	GSE136879
	Macrophage_YPD RNA-seq	Transcriptome profiling during macrophage infection.	GSE136879

## Sheet: GffCompare
fref_gene_id	ref_id	class_code	qry_gene_id (non-coding)	qry_id
CNAG_00006	CNAG_00006-t26_1	x	CNAG_12001	CNAG_12001-t26_1
-	-	u	CNAG_12024	CNAG_12024-t26_1
CNAG_00172	CNAG_00172-t26_1	x	CNAG_12029	CNAG_12029-t26_1
CNAG_00179	CNAG_00179-t26_1	s	CNAG_12031	CNAG_12031-t26_1
CNAG_00192	CNAG_00192-t26_1	x	CNAG_12035	CNAG_12035-t26_1
-	-	u	CNAG_12036	CNAG_12036-t26_1
CNAG_00315	CNAG_00315-t26_1	x	CNAG_12046	CNAG_12046-t26_1
CNAG_07351	CNAG_07351-t26_1	x	CNAG_12048	CNAG_12048-t26_1
CNAG_00365	CNAG_00365-t26_1	x	CNAG_12052	CNAG_12052-t26_1
CNAG_00419	CNAG_00419-t26_1	s	CNAG_12057	CNAG_12057-t26_1
CNAG_00529	CNAG_00529-t26_1	x	CNAG_12063	CNAG_12063-t26_1
-	-	u	CNAG_12065	CNAG_12065-t26_1
-	-	u	CNAG_12067	CNAG_12067-t26_1
CNAG_00558	CNAG_00558-t26_1	x	CNAG_12074	CNAG_12074-t26_1
CNAG_00571	CNAG_00571-t26_1	x	CNAG_12075	CNAG_12075-t26_1
CNAG_00591	CNAG_00591-t26_1	x	CNAG_12079	CNAG_12079-t26_1
CNAG_00624	CNAG_00624-t26_1	x	CNAG_12084	CNAG_12084-t26_1
-	-	u	CNAG_12101	CNAG_12101-t26_1
CNAG_00824	CNAG_00824-t26_1	p	CNAG_12119	CNAG_12119-t26_1
CNAG_00843	CNAG_00843-t26_1	x	CNAG_12123	CNAG_12123-t26_1
CNAG_00069	CNAG_00069-t26_1	x	CNAG_12013	CNAG_12013-t26_1
-	-	u	CNAG_12018	CNAG_12018-t26_1
CNAG_00129	CNAG_00129-t26_1	x	CNAG_12020	CNAG_12020-t26_1
CNAG_00140	CNAG_00140-t26_1	x	CNAG_12021	CNAG_12021-t26_1
-	-	u	CNAG_12028	CNAG_12028-t26_1
CNAG_00182	CNAG_00182-t26_1	x	CNAG_12032	CNAG_12032-t26_1
CNAG_07316	CNAG_07316-t26_1	x	CNAG_12037	CNAG_12037-t26_1
CNAG_00253	CNAG_00253-t26_1	x	CNAG_12040	CNAG_12040-t26_1
CNAG_00540	CNAG_00540-t26_1	x	CNAG_12068	CNAG_12068-t26_1
CNAG_00597	CNAG_00597-t26_1	x	CNAG_12081	CNAG_12081-t26_1
CNAG_00602	CNAG_00602-t26_1	x	CNAG_12082	CNAG_12082-t26_1
CNAG_00682	CNAG_00682-t26_1	x	CNAG_12090	CNAG_12090-t26_1
-	-	u	CNAG_12093	CNAG_12093-t26_1
CNAG_00728	CNAG_00728-t26_1	x	CNAG_12096	CNAG_12096-t26_1
-	-	u	CNAG_12106	CNAG_12106-t26_1
-	-	u	CNAG_12108	CNAG_12108-t26_1
-	-	u	CNAG_12118	CNAG_12118-t26_1
CNAG_00844	CNAG_00844-t26_1	x	CNAG_12124	CNAG_12124-t26_1
CNAG_07390	CNAG_07390-t26_1	x	CNAG_12127	CNAG_12127-t26_1
-	-	u	CNAG_12002	CNAG_12002-t26_1
CNAG_00164	CNAG_00164-t26_1	x	CNAG_12026	CNAG_12026-t26_1
CNAG_00290	CNAG_00290-t26_1	x	CNAG_12042	CNAG_12042-t26_1
CNAG_00349	CNAG_00349-t26_1	x	CNAG_12050	CNAG_12050-t26_1
CNAG_00360	CNAG_00360-t26_1	x	CNAG_12051	CNAG_12051-t26_1
CNAG_07358	CNAG_07358-t26_1	x	CNAG_12054	CNAG_12054-t26_1
CNAG_00480	CNAG_00480-t26_1	x	CNAG_12061	CNAG_12061-t26_1
CNAG_00572	CNAG_00572-t26_1	x	CNAG_12077	CNAG_12077-t26_1
CNAG_00589	CNAG_00589-t26_1	x	CNAG_12078	CNAG_12078-t26_1
CNAG_00597	CNAG_00597-t26_1	x	CNAG_12080	CNAG_12080-t26_1
-	-	u	CNAG_12102	CNAG_12102-t26_1
-	-	u	CNAG_12105	CNAG_12105-t26_1
CNAG_00792	CNAG_00792-t26_1	x	CNAG_12116	CNAG_12116-t26_1
CNAG_07388	CNAG_07388-t26_1	x	CNAG_12126	CNAG_12126-t26_1
CNAG_00005	CNAG_00005-t26_1	x	CNAG_12000	CNAG_12000-t26_1
CNAG_07308	CNAG_07308-t26_1	x	CNAG_12006	CNAG_12006-t26_1
CNAG_00049	CNAG_00049-t26_1	x	CNAG_12008	CNAG_12008-t26_1
-	-	u	CNAG_12010	CNAG_12010-t26_1
CNAG_00078	CNAG_00078-t26_1	p	CNAG_12014	CNAG_12014-t26_1
CNAG_00141	CNAG_00141-t26_1	x	CNAG_12022	CNAG_12022-t26_1
-	-	u	CNAG_12027	CNAG_12027-t26_1
-	-	u	CNAG_12034	CNAG_12034-t26_1
-	-	u	CNAG_12053	CNAG_12053-t26_1
-	-	u	CNAG_12071	CNAG_12071-t26_1
CNAG_00681	CNAG_00681-t26_1	x	CNAG_12088	CNAG_12088-t26_1
CNAG_00692	CNAG_00692-t26_1	x	CNAG_12091	CNAG_12091-t26_1
-	-	u	CNAG_12094	CNAG_12094-t26_1
CNAG_00726	CNAG_00726-t26_1	x	CNAG_12095	CNAG_12095-t26_1
CNAG_00745	CNAG_00745-t26_1	x	CNAG_12104	CNAG_12104-t26_1
CNAG_00789	CNAG_00789-t26_1	x	CNAG_12114	CNAG_12114-t26_1
CNAG_00020	CNAG_00020-t26_1	x	CNAG_12003	CNAG_12003-t26_1
CNAG_00021	CNAG_00021-t26_1	x	CNAG_12004	CNAG_12004-t26_1
CNAG_00048	CNAG_00048-t26_1	x	CNAG_12007	CNAG_12007-t26_1
-	-	u	CNAG_12016	CNAG_12016-t26_1
-	-	u	CNAG_12044	CNAG_12044-t26_1
CNAG_00403	CNAG_00403-t26_1	x	CNAG_12055	CNAG_12055-t26_1
CNAG_00463	CNAG_00463-t26_1	s	CNAG_12060	CNAG_12060-t26_1
CNAG_00532	CNAG_00532-t26_1	x	CNAG_12064	CNAG_12064-t26_1
CNAG_07367	CNAG_07367-t26_1	x	CNAG_12069	CNAG_12069-t26_1
CNAG_00676	CNAG_00676-t26_1	x	CNAG_12087	CNAG_12087-t26_1
-	-	u	CNAG_12092	CNAG_12092-t26_1
CNAG_00757	CNAG_00757-t26_1	p	CNAG_12110	CNAG_12110-t26_1
CNAG_00772	CNAG_00772-t26_1	x	CNAG_12112	CNAG_12112-t26_1
CNAG_00795	CNAG_00795-t26_1	x	CNAG_12117	CNAG_12117-t26_1
-	-	u	CNAG_12012	CNAG_12012-t26_1
CNAG_00098	CNAG_00098-t26_1	x	CNAG_12015	CNAG_12015-t26_1
CNAG_00156	CNAG_00156-t26_1	x	CNAG_12025	CNAG_12025-t26_1
-	-	u	CNAG_12030	CNAG_12030-t26_1
-	-	u	CNAG_12033	CNAG_12033-t26_1
CNAG_07949	CNAG_07949-t26_1	x	CNAG_12043	CNAG_12043-t26_1
CNAG_00317	CNAG_00317-t26_1	x	CNAG_12047	CNAG_12047-t26_1
CNAG_00328	CNAG_00328-t26_1	x	CNAG_12049	CNAG_12049-t26_1
CNAG_07376	CNAG_07376-t26_1	x	CNAG_12085	CNAG_12085-t26_1
-	-	u	CNAG_12099	CNAG_12099-t26_1
-	-	u	CNAG_12100	CNAG_12100-t26_1
-	-	u	CNAG_12103	CNAG_12103-t26_1
CNAG_00775	CNAG_00775-t26_1	x	CNAG_12113	CNAG_12113-t26_1
CNAG_00122	CNAG_00122-t26_1	x	CNAG_12017	CNAG_12017-t26_1
CNAG_00128	CNAG_00128-t26_1	x	CNAG_12019	CNAG_12019-t26_1
CNAG_00142	CNAG_00142-t26_1	x	CNAG_12023	CNAG_12023-t26_1
CNAG_00269	CNAG_00269-t26_1	x	CNAG_12041	CNAG_12041-t26_1
CNAG_00406	CNAG_00406-t26_1	s	CNAG_12056	CNAG_12056-t26_1
CNAG_00456	CNAG_00456-t26_1	x	CNAG_12059	CNAG_12059-t26_1
CNAG_00502	CNAG_00502-t26_1	x	CNAG_12062	CNAG_12062-t26_1
-	-	u	CNAG_12070	CNAG_12070-t26_1
CNAG_07368	CNAG_07368-t26_1	x	CNAG_12072	CNAG_12072-t26_1
CNAG_00571	CNAG_00571-t26_1	x	CNAG_12076	CNAG_12076-t26_1
CNAG_00642	CNAG_00642-t26_1	x	CNAG_12086	CNAG_12086-t26_1
CNAG_00681	CNAG_00681-t26_1	x	CNAG_12089	CNAG_12089-t26_1
CNAG_00729	CNAG_00729-t26_1	x	CNAG_12097	CNAG_12097-t26_1
-	-	u	CNAG_12098	CNAG_12098-t26_1
-	-	u	CNAG_12111	CNAG_12111-t26_1
CNAG_00826	CNAG_00826-t26_1	x	CNAG_12120	CNAG_12120-t26_1
CNAG_00833	CNAG_00833-t26_1	x	CNAG_12122	CNAG_12122-t26_1
CNAG_00851	CNAG_00851-t26_1	x	CNAG_12125	CNAG_12125-t26_1
-	-	u	CNAG_12005	CNAG_12005-t26_1
-	-	u	CNAG_12009	CNAG_12009-t26_1
-	-	u	CNAG_12011	CNAG_12011-t26_1
CNAG_07344	CNAG_07344-t26_1	x	CNAG_12038	CNAG_12038-t26_1
CNAG_00250	CNAG_00250-t26_1	x	CNAG_12039	CNAG_12039-t26_1
CNAG_00306	CNAG_00306-t26_1	p	CNAG_12045	CNAG_12045-t26_1
CNAG_00444	CNAG_00444-t26_1	x	CNAG_12058	CNAG_12058-t26_1
-	-	u	CNAG_12066	CNAG_12066-t26_1
CNAG_00554	CNAG_00554-t26_1	x	CNAG_12073	CNAG_12073-t26_1
CNAG_00605	CNAG_00605-t26_1	x	CNAG_12083	CNAG_12083-t26_1
CNAG_00749	CNAG_00749-t26_1	x	CNAG_12107	CNAG_12107-t26_1
CNAG_00751	CNAG_00751-t26_1	x	CNAG_12109	CNAG_12109-t26_1
CNAG_00791	CNAG_00791-t26_1	x	CNAG_12115	CNAG_12115-t26_1
-	-	u	CNAG_12140	CNAG_12140-t26_1
CNAG_07469	CNAG_07469-t26_1	x	CNAG_12147	CNAG_12147-t26_1
CNAG_03643	CNAG_03643-t26_1	p	CNAG_12150	CNAG_12150-t26_1
CNAG_03654	CNAG_03654-t26_1	x	CNAG_12152	CNAG_12152-t26_1
CNAG_03677	CNAG_03677-t26_1	x	CNAG_12154	CNAG_12154-t26_1
CNAG_03695	CNAG_03695-t26_1	s	CNAG_12155	CNAG_12155-t26_1
-	-	u	CNAG_12161	CNAG_12161-t26_1
CNAG_03797	CNAG_03797-t26_1	x	CNAG_12170	CNAG_12170-t26_1
CNAG_03894	CNAG_03894-t26_1	x	CNAG_12178	CNAG_12178-t26_1
CNAG_03921	CNAG_03921-t26_1	x	CNAG_12188	CNAG_12188-t26_1
CNAG_03972	CNAG_03972-t26_1	x	CNAG_12193	CNAG_12193-t26_1
CNAG_03983	CNAG_03983-t26_1	x	CNAG_12195	CNAG_12195-t26_1
CNAG_07962	CNAG_07962-t26_1	p	CNAG_12131	CNAG_12131-t26_1
CNAG_06758	CNAG_06758-t26_1	x	CNAG_12136	CNAG_12136-t26_1
-	-	u	CNAG_12139	CNAG_12139-t26_1
CNAG_07963	CNAG_07963-t26_1	x	CNAG_12143	CNAG_12143-t26_1
-	-	u	CNAG_12151	CNAG_12151-t26_1
CNAG_03700	CNAG_03700-t26_1	x	CNAG_12156	CNAG_12156-t26_1
CNAG_03764	CNAG_03764-t26_1	x	CNAG_12165	CNAG_12165-t26_1
CNAG_03834	CNAG_03834-t26_1	x	CNAG_12175	CNAG_12175-t26_1
CNAG_03894	CNAG_03894-t26_1	x	CNAG_12179	CNAG_12179-t26_1
CNAG_03894	CNAG_03894-t26_1	x	CNAG_12180	CNAG_12180-t26_1
CNAG_03896	CNAG_03896-t26_1	x	CNAG_12182	CNAG_12182-t26_1
CNAG_03898	CNAG_03898-t26_1	p	CNAG_12184	CNAG_12184-t26_1
CNAG_03907	CNAG_03907-t26_1	x	CNAG_12186	CNAG_12186-t26_1
-	-	u	CNAG_12189	CNAG_12189-t26_1
CNAG_04016	CNAG_04016-t26_1	x	CNAG_12199	CNAG_12199-t26_1
-	-	u	CNAG_12203	CNAG_12203-t26_1
-	-	u	CNAG_12204	CNAG_12204-t26_1
-	-	u	CNAG_12132	CNAG_12132-t26_1
CNAG_07465	CNAG_07465-t26_1	x	CNAG_12144	CNAG_12144-t26_1
-	-	u	CNAG_12145	CNAG_12145-t26_1
CNAG_03745	CNAG_03745-t26_1	x	CNAG_12162	CNAG_12162-t26_1
-	-	u	CNAG_12166	CNAG_12166-t26_1
CNAG_03881	CNAG_03881-t26_1	x	CNAG_12177	CNAG_12177-t26_1
-	-	u	CNAG_12183	CNAG_12183-t26_1
-	-	u	CNAG_12201	CNAG_12201-t26_1
CNAG_04079	CNAG_04079-t26_1	p	CNAG_12205	CNAG_12205-t26_1
-	-	u	CNAG_12207	CNAG_12207-t26_1
CNAG_04084	CNAG_04084-t26_1	x	CNAG_12208	CNAG_12208-t26_1
CNAG_06760	CNAG_06760-t26_1	x	CNAG_12135	CNAG_12135-t26_1
-	-	u	CNAG_12141	CNAG_12141-t26_1
CNAG_03597	CNAG_03597-t26_2	x	CNAG_12146	CNAG_12146-t26_1
CNAG_03617	CNAG_03617-t26_1	x	CNAG_12148	CNAG_12148-t26_1
-	-	u	CNAG_12167	CNAG_12167-t26_1
CNAG_03781	CNAG_03781-t26_1	x	CNAG_12169	CNAG_12169-t26_1
-	-	u	CNAG_12171	CNAG_12171-t26_1
CNAG_03825	CNAG_03825-t26_2	x	CNAG_12173	CNAG_12173-t26_1
CNAG_03894	CNAG_03894-t26_1	p	CNAG_12181	CNAG_12181-t26_1
-	-	u	CNAG_12190	CNAG_12190-t26_1
CNAG_06731	CNAG_06731-t26_1	x	CNAG_12142	CNAG_12142-t26_1
-	-	u	CNAG_12149	CNAG_12149-t26_1
CNAG_04007	CNAG_04007-t26_1	x	CNAG_12197	CNAG_12197-t26_1
-	-	u	CNAG_12206	CNAG_12206-t26_1
CNAG_04084	CNAG_04084-t26_1	x	CNAG_12209	CNAG_12209-t26_1
CNAG_03702	CNAG_03702-t26_1	x	CNAG_12157	CNAG_12157-t26_1
CNAG_03821	CNAG_03821-t26_1	x	CNAG_12172	CNAG_12172-t26_1
CNAG_03826	CNAG_03826-t26_1	x	CNAG_12174	CNAG_12174-t26_1
CNAG_03975	CNAG_03975-t26_1	x	CNAG_12194	CNAG_12194-t26_1
CNAG_04015	CNAG_04015-t26_1	x	CNAG_12198	CNAG_12198-t26_1
-	-	u	CNAG_12200	CNAG_12200-t26_1
CNAG_04071	CNAG_04071-t26_1	p	CNAG_12202	CNAG_12202-t26_1
CNAG_04085	CNAG_04085-t26_1	x	CNAG_12210	CNAG_12210-t26_1
CNAG_06779	CNAG_06779-t26_1	x	CNAG_12130	CNAG_12130-t26_1
-	-	u	CNAG_12133	CNAG_12133-t26_1
CNAG_06763	CNAG_06763-t26_1	x	CNAG_12134	CNAG_12134-t26_1
CNAG_03711	CNAG_03711-t26_1	x	CNAG_12158	CNAG_12158-t26_1
CNAG_07475	CNAG_07475-t26_1	x	CNAG_12159	CNAG_12159-t26_1
CNAG_03754	CNAG_03754-t26_1	x	CNAG_12164	CNAG_12164-t26_1
-	-	u	CNAG_12176	CNAG_12176-t26_1
CNAG_03911	CNAG_03911-t26_1	x	CNAG_12187	CNAG_12187-t26_1
CNAG_07486	CNAG_07486-t26_1	x	CNAG_12191	CNAG_12191-t26_1
CNAG_03988	CNAG_03988-t26_1	x	CNAG_12196	CNAG_12196-t26_1
CNAG_06801	CNAG_06801-t26_1	x	CNAG_12128	CNAG_12128-t26_1
CNAG_06783	CNAG_06783-t26_1	x	CNAG_12129	CNAG_12129-t26_1
CNAG_06757	CNAG_06757-t26_1	p	CNAG_12137	CNAG_12137-t26_1
CNAG_06753	CNAG_06753-t26_1	x	CNAG_12138	CNAG_12138-t26_1
-	-	u	CNAG_12153	CNAG_12153-t26_1
CNAG_03714	CNAG_03714-t26_1	x	CNAG_12160	CNAG_12160-t26_1
CNAG_07478	CNAG_07478-t26_1	x	CNAG_12163	CNAG_12163-t26_1
-	-	u	CNAG_12168	CNAG_12168-t26_1
CNAG_03903	CNAG_03903-t26_1	x	CNAG_12185	CNAG_12185-t26_1
CNAG_03953	CNAG_03953-t26_1	x	CNAG_12192	CNAG_12192-t26_1
CNAG_04093	CNAG_04093-t26_1	x	CNAG_12211	CNAG_12211-t26_1
-	-	u	CNAG_12228	CNAG_12228-t26_1
CNAG_02856	CNAG_02856-t26_1	x	CNAG_12254	CNAG_12254-t26_1
CNAG_07515	CNAG_07515-t26_1	x	CNAG_12256	CNAG_12256-t26_1
CNAG_02834	CNAG_02834-t26_1	x	CNAG_12261	CNAG_12261-t26_1
-	-	u	CNAG_12271	CNAG_12271-t26_1
-	-	u	CNAG_12290	CNAG_12290-t26_1
CNAG_07542	CNAG_07542-t26_1	x	CNAG_12299	CNAG_12299-t26_1
-	-	u	CNAG_12324	CNAG_12324-t26_1
CNAG_06902	CNAG_06902-t26_1	x	CNAG_12325	CNAG_12325-t26_1
CNAG_03071	CNAG_03071-t26_1	x	CNAG_12218	CNAG_12218-t26_1
CNAG_07968	CNAG_07968-t26_1	p	CNAG_12225	CNAG_12225-t26_1
-	-	u	CNAG_12227	CNAG_12227-t26_1
CNAG_02937	CNAG_02937-t26_1	x	CNAG_12236	CNAG_12236-t26_1
-	-	u	CNAG_12246	CNAG_12246-t26_1
-	-	u	CNAG_12270	CNAG_12270-t26_1
-	-	u	CNAG_12283	CNAG_12283-t26_1
CNAG_02660	CNAG_02660-t26_1	s	CNAG_12293	CNAG_12293-t26_1
-	-	u	CNAG_12296	CNAG_12296-t26_1
-	-	u	CNAG_12298	CNAG_12298-t26_1
CNAG_02596	CNAG_02596-t26_1	x	CNAG_12303	CNAG_12303-t26_1
CNAG_02583	CNAG_02583-t26_1	x	CNAG_12306	CNAG_12306-t26_1
CNAG_02572	CNAG_02572-t26_1	p	CNAG_12312	CNAG_12312-t26_1
CNAG_07972	CNAG_07972-t26_1	x	CNAG_12315	CNAG_12315-t26_1
CNAG_06891	CNAG_06891-t26_2	x	CNAG_12318	CNAG_12318-t26_1
CNAG_06898	CNAG_06898-t26_1	p	CNAG_12323	CNAG_12323-t26_1
CNAG_06902	CNAG_06902-t26_1	x	CNAG_12326	CNAG_12326-t26_1
CNAG_06904	CNAG_06904-t26_1	x	CNAG_12327	CNAG_12327-t26_1
-	-	u	CNAG_12213	CNAG_12213-t26_1
CNAG_03057	CNAG_03057-t26_1	x	CNAG_12220	CNAG_12220-t26_1
CNAG_03047	CNAG_03047-t26_1	x	CNAG_12222	CNAG_12222-t26_1
-	-	u	CNAG_12258	CNAG_12258-t26_1
CNAG_02799	CNAG_02799-t26_1	s	CNAG_12267	CNAG_12267-t26_1
CNAG_02700	CNAG_02700-t26_1	x	CNAG_12282	CNAG_12282-t26_1
-	-	u	CNAG_12285	CNAG_12285-t26_1
CNAG_02690	CNAG_02690-t26_1	x	CNAG_12287	CNAG_12287-t26_1
CNAG_07528	CNAG_07528-t26_1	x	CNAG_12291	CNAG_12291-t26_1
-	-	u	CNAG_12300	CNAG_12300-t26_1
CNAG_02574	CNAG_02574-t26_1	x	CNAG_12309	CNAG_12309-t26_1
CNAG_03082	CNAG_03082-t26_1	x	CNAG_12215	CNAG_12215-t26_1
-	-	u	CNAG_12229	CNAG_12229-t26_1
CNAG_02884	CNAG_02884-t26_1	p	CNAG_12244	CNAG_12244-t26_1
CNAG_02882	CNAG_02882-t26_1	x	CNAG_12247	CNAG_12247-t26_1
-	-	u	CNAG_12252	CNAG_12252-t26_1
CNAG_02843	CNAG_02843-t26_1	x	CNAG_12260	CNAG_12260-t26_1
-	-	u	CNAG_12269	CNAG_12269-t26_1
-	-	u	CNAG_12274	CNAG_12274-t26_1
CNAG_02720	CNAG_02720-t26_1	x	CNAG_12279	CNAG_12279-t26_1
CNAG_02712	CNAG_02712-t26_1	p	CNAG_12281	CNAG_12281-t26_1
CNAG_07550	CNAG_07550-t26_1	x	CNAG_12301	CNAG_12301-t26_1
CNAG_02572	CNAG_02572-t26_1	x	CNAG_12310	CNAG_12310-t26_1
-	-	u	CNAG_12320	CNAG_12320-t26_1
CNAG_06962	CNAG_06962-t26_1	x	CNAG_12214	CNAG_12214-t26_1
-	-	u	CNAG_12239	CNAG_12239-t26_1
-	-	u	CNAG_12251	CNAG_12251-t26_1
CNAG_02859	CNAG_02859-t26_1	x	CNAG_12253	CNAG_12253-t26_1
CNAG_02844	CNAG_02844-t26_1	x	CNAG_12259	CNAG_12259-t26_1
CNAG_02805	CNAG_02805-t26_1	x	CNAG_12265	CNAG_12265-t26_1
CNAG_02662	CNAG_02662-t26_1	x	CNAG_12292	CNAG_12292-t26_1
CNAG_02658	CNAG_02658-t26_1	p	CNAG_12295	CNAG_12295-t26_1
CNAG_02582	CNAG_02582-t26_1	x	CNAG_12307	CNAG_12307-t26_1
CNAG_02572	CNAG_02572-t26_1	x	CNAG_12311	CNAG_12311-t26_1
-	-	u	CNAG_12319	CNAG_12319-t26_1
CNAG_06916	CNAG_06916-t26_1	x	CNAG_12330	CNAG_12330-t26_1
CNAG_06922	CNAG_06922-t26_1	x	CNAG_12332	CNAG_12332-t26_1
-	-	u	CNAG_12217	CNAG_12217-t26_1
CNAG_02992	CNAG_02992-t26_1	x	CNAG_12231	CNAG_12231-t26_1
CNAG_02984	CNAG_02984-t26_1	x	CNAG_12232	CNAG_12232-t26_1
CNAG_02965	CNAG_02965-t26_1	x	CNAG_12234	CNAG_12234-t26_1
CNAG_02947	CNAG_02947-t26_1	x	CNAG_12235	CNAG_12235-t26_1
-	-	u	CNAG_12243	CNAG_12243-t26_1
CNAG_02863	CNAG_02863-t26_1	x	CNAG_12250	CNAG_12250-t26_1
CNAG_02791	CNAG_02791-t26_1	x	CNAG_12268	CNAG_12268-t26_1
CNAG_02724	CNAG_02724-t26_1	x	CNAG_12276	CNAG_12276-t26_1
CNAG_02720	CNAG_02720-t26_1	x	CNAG_12278	CNAG_12278-t26_1
CNAG_02694	CNAG_02694-t26_2	x	CNAG_12286	CNAG_12286-t26_1
CNAG_02688	CNAG_02688-t26_1	x	CNAG_12288	CNAG_12288-t26_1
CNAG_02659	CNAG_02659-t26_2	x	CNAG_12294	CNAG_12294-t26_1
CNAG_06890	CNAG_06890-t26_1	x	CNAG_12317	CNAG_12317-t26_1
CNAG_06909	CNAG_06909-t26_1	x	CNAG_12328	CNAG_12328-t26_1
-	-	u	CNAG_12333	CNAG_12333-t26_1
CNAG_03060	CNAG_03060-t26_1	x	CNAG_12219	CNAG_12219-t26_1
-	-	u	CNAG_12224	CNAG_12224-t26_1
CNAG_03006	CNAG_03006-t26_1	x	CNAG_12230	CNAG_12230-t26_1
CNAG_02932	CNAG_02932-t26_1	x	CNAG_12237	CNAG_12237-t26_1
CNAG_07513	CNAG_07513-t26_1	x	CNAG_12240	CNAG_12240-t26_1
-	-	u	CNAG_12245	CNAG_12245-t26_1
CNAG_02823	CNAG_02823-t26_1	x	CNAG_12262	CNAG_12262-t26_1
-	-	u	CNAG_12266	CNAG_12266-t26_1
CNAG_02758	CNAG_02758-t26_1	x	CNAG_12273	CNAG_12273-t26_1
CNAG_02722	CNAG_02722-t26_1	x	CNAG_12277	CNAG_12277-t26_1
CNAG_02719	CNAG_02719-t26_1	x	CNAG_12280	CNAG_12280-t26_1
CNAG_02684	CNAG_02684-t26_1	s	CNAG_12289	CNAG_12289-t26_1
CNAG_02604	CNAG_02604-t26_1	x	CNAG_12302	CNAG_12302-t26_1
CNAG_02574	CNAG_02574-t26_1	x	CNAG_12308	CNAG_12308-t26_1
CNAG_07575	CNAG_07575-t26_1	x	CNAG_12313	CNAG_12313-t26_1
-	-	u	CNAG_12321	CNAG_12321-t26_1
-	-	u	CNAG_12322	CNAG_12322-t26_1
CNAG_06918	CNAG_06918-t26_1	x	CNAG_12331	CNAG_12331-t26_1
-	-	u	CNAG_12212	CNAG_12212-t26_1
-	-	u	CNAG_12216	CNAG_12216-t26_1
-	-	u	CNAG_12223	CNAG_12223-t26_1
-	-	u	CNAG_12226	CNAG_12226-t26_1
CNAG_07507	CNAG_07507-t26_1	x	CNAG_12233	CNAG_12233-t26_1
-	-	u	CNAG_12238	CNAG_12238-t26_1
CNAG_02904	CNAG_02904-t26_1	x	CNAG_12241	CNAG_12241-t26_1
CNAG_02900	CNAG_02900-t26_1	x	CNAG_12242	CNAG_12242-t26_1
CNAG_02869	CNAG_02869-t26_1	x	CNAG_12248	CNAG_12248-t26_1
CNAG_02865	CNAG_02865-t26_1	s	CNAG_12249	CNAG_12249-t26_1
CNAG_02855	CNAG_02855-t26_1	x	CNAG_12255	CNAG_12255-t26_1
CNAG_02849	CNAG_02849-t26_1	x	CNAG_12257	CNAG_12257-t26_1
-	-	u	CNAG_12263	CNAG_12263-t26_1
CNAG_02822	CNAG_02822-t26_1	x	CNAG_12264	CNAG_12264-t26_1
CNAG_02759	CNAG_02759-t26_1	x	CNAG_12272	CNAG_12272-t26_1
CNAG_02724	CNAG_02724-t26_1	x	CNAG_12275	CNAG_12275-t26_1
-	-	u	CNAG_12284	CNAG_12284-t26_1
-	-	u	CNAG_12297	CNAG_12297-t26_1
CNAG_02594	CNAG_02594-t26_1	x	CNAG_12304	CNAG_12304-t26_1
CNAG_02592	CNAG_02592-t26_1	x	CNAG_12305	CNAG_12305-t26_1
CNAG_02570	CNAG_02570-t26_1	x	CNAG_12314	CNAG_12314-t26_1
CNAG_06915	CNAG_06915-t26_1	x	CNAG_12329	CNAG_12329-t26_1
CNAG_07799	CNAG_07799-t26_1	x	CNAG_12341	CNAG_12341-t26_1
-	-	u	CNAG_12350	CNAG_12350-t26_1
-	-	u	CNAG_12351	CNAG_12351-t26_1
CNAG_04992	CNAG_04992-t26_1	x	CNAG_12353	CNAG_12353-t26_1
CNAG_05000	CNAG_05000-t26_1	p	CNAG_12355	CNAG_12355-t26_1
CNAG_05010	CNAG_05010-t26_1	x	CNAG_12357	CNAG_12357-t26_1
CNAG_05037	CNAG_05037-t26_1	x	CNAG_12359	CNAG_12359-t26_1
CNAG_05070	CNAG_05070-t26_1	x	CNAG_12362	CNAG_12362-t26_1
CNAG_05157	CNAG_05157-t26_1	x	CNAG_12375	CNAG_12375-t26_1
CNAG_05158	CNAG_05158-t26_1	x	CNAG_12376	CNAG_12376-t26_1
CNAG_05251	CNAG_05251-t26_1	x	CNAG_12389	CNAG_12389-t26_1
CNAG_07827	CNAG_07827-t26_1	x	CNAG_12401	CNAG_12401-t26_1
-	-	u	CNAG_12405	CNAG_12405-t26_1
-	-	u	CNAG_12407	CNAG_12407-t26_1
CNAG_04947	CNAG_04947-t26_1	x	CNAG_12335	CNAG_12335-t26_1
CNAG_04975	CNAG_04975-t26_1	x	CNAG_12343	CNAG_12343-t26_1
CNAG_05072	CNAG_05072-t26_1	x	CNAG_12363	CNAG_12363-t26_1
-	-	u	CNAG_12364	CNAG_12364-t26_1
CNAG_05155	CNAG_05155-t26_1	x	CNAG_12374	CNAG_12374-t26_1
-	-	u	CNAG_12379	CNAG_12379-t26_1
-	-	u	CNAG_12384	CNAG_12384-t26_1
CNAG_05245	CNAG_05245-t26_1	x	CNAG_12388	CNAG_12388-t26_1
CNAG_07826	CNAG_07826-t26_1	x	CNAG_12400	CNAG_12400-t26_1
CNAG_04953	CNAG_04953-t26_1	x	CNAG_12336	CNAG_12336-t26_1
-	-	u	CNAG_12337	CNAG_12337-t26_1
CNAG_04974	CNAG_04974-t26_1	x	CNAG_12342	CNAG_12342-t26_1
CNAG_04978	CNAG_04978-t26_1	x	CNAG_12344	CNAG_12344-t26_1
CNAG_04993	CNAG_04993-t26_1	s	CNAG_12354	CNAG_12354-t26_1
CNAG_05061	CNAG_05061-t26_2	s	CNAG_12361	CNAG_12361-t26_1
CNAG_05142	CNAG_05142-t26_1	x	CNAG_12371	CNAG_12371-t26_1
CNAG_05147	CNAG_05147-t26_1	x	CNAG_12372	CNAG_12372-t26_1
CNAG_05154	CNAG_05154-t26_1	x	CNAG_12373	CNAG_12373-t26_1
-	-	u	CNAG_12380	CNAG_12380-t26_1
CNAG_05224	CNAG_05224-t26_1	x	CNAG_12385	CNAG_12385-t26_1
CNAG_05283	CNAG_05283-t26_1	x	CNAG_12396	CNAG_12396-t26_1
CNAG_05289	CNAG_05289-t26_1	x	CNAG_12397	CNAG_12397-t26_1
CNAG_05305	CNAG_05305-t26_1	x	CNAG_12403	CNAG_12403-t26_1
CNAG_05075	CNAG_05075-t26_1	x	CNAG_12365	CNAG_12365-t26_1
CNAG_05231	CNAG_05231-t26_1	x	CNAG_12386	CNAG_12386-t26_1
CNAG_05263	CNAG_05263-t26_1	x	CNAG_12391	CNAG_12391-t26_1
-	-	u	CNAG_12393	CNAG_12393-t26_1
-	-	u	CNAG_12395	CNAG_12395-t26_1
CNAG_05289	CNAG_05289-t26_1	x	CNAG_12398	CNAG_12398-t26_1
CNAG_05306	CNAG_05306-t26_1	x	CNAG_12404	CNAG_12404-t26_1
-	-	u	CNAG_12338	CNAG_12338-t26_1
-	-	u	CNAG_12346	CNAG_12346-t26_1
CNAG_05021	CNAG_05021-t26_2	x	CNAG_12358	CNAG_12358-t26_1
-	-	u	CNAG_12370	CNAG_12370-t26_1
-	-	u	CNAG_12394	CNAG_12394-t26_1
-	-	u	CNAG_12339	CNAG_12339-t26_1
CNAG_04979	CNAG_04979-t26_1	x	CNAG_12345	CNAG_12345-t26_1
CNAG_04983	CNAG_04983-t26_1	x	CNAG_12347	CNAG_12347-t26_1
CNAG_04987	CNAG_04987-t26_1	x	CNAG_12348	CNAG_12348-t26_1
-	-	u	CNAG_12377	CNAG_12377-t26_1
CNAG_07817	CNAG_07817-t26_1	x	CNAG_12382	CNAG_12382-t26_1
CNAG_05255	CNAG_05255-t26_1	x	CNAG_12390	CNAG_12390-t26_1
-	-	u	CNAG_12392	CNAG_12392-t26_1
CNAG_05289	CNAG_05289-t26_1	x	CNAG_12399	CNAG_12399-t26_1
CNAG_07795	CNAG_07795-t26_1	x	CNAG_12334	CNAG_12334-t26_1
CNAG_05009	CNAG_05009-t26_1	x	CNAG_12356	CNAG_12356-t26_1
CNAG_05102	CNAG_05102-t26_1	x	CNAG_12367	CNAG_12367-t26_1
-	-	u	CNAG_12369	CNAG_12369-t26_1
CNAG_05159	CNAG_05159-t26_1	x	CNAG_12378	CNAG_12378-t26_1
-	-	u	CNAG_12387	CNAG_12387-t26_1
-	-	u	CNAG_12406	CNAG_12406-t26_1
CNAG_07798	CNAG_07798-t26_1	x	CNAG_12340	CNAG_12340-t26_1
CNAG_04988	CNAG_04988-t26_1	x	CNAG_12349	CNAG_12349-t26_1
CNAG_05053	CNAG_05053-t26_1	x	CNAG_12360	CNAG_12360-t26_1
CNAG_05093	CNAG_05093-t26_1	x	CNAG_12366	CNAG_12366-t26_1
CNAG_05111	CNAG_05111-t26_1	x	CNAG_12368	CNAG_12368-t26_1
CNAG_05169	CNAG_05169-t26_1	x	CNAG_12381	CNAG_12381-t26_1
-	-	u	CNAG_12383	CNAG_12383-t26_1
-	-	u	CNAG_12402	CNAG_12402-t26_1
-	-	u	CNAG_12417	CNAG_12417-t26_1
CNAG_06814	CNAG_06814-t26_1	p	CNAG_12422	CNAG_12422-t26_1
CNAG_06805	CNAG_06805-t26_1	x	CNAG_12426	CNAG_12426-t26_1
CNAG_01438	CNAG_01438-t26_1	x	CNAG_12430	CNAG_12430-t26_1
-	-	u	CNAG_12450	CNAG_12450-t26_1
CNAG_01210	CNAG_01210-t26_1	x	CNAG_12458	CNAG_12458-t26_1
-	-	u	CNAG_12459	CNAG_12459-t26_1
CNAG_01140	CNAG_01140-t26_1	x	CNAG_12461	CNAG_12461-t26_1
-	-	u	CNAG_12464	CNAG_12464-t26_1
CNAG_01118	CNAG_01118-t26_1	x	CNAG_12469	CNAG_12469-t26_1
-	-	u	CNAG_12471	CNAG_12471-t26_1
CNAG_01101	CNAG_01101-t26_1	x	CNAG_12472	CNAG_12472-t26_1
CNAG_01075	CNAG_01075-t26_1	x	CNAG_12478	CNAG_12478-t26_1
CNAG_01040	CNAG_01040-t26_1	x	CNAG_12484	CNAG_12484-t26_1
CNAG_01019	CNAG_01019-t26_1	x	CNAG_12486	CNAG_12486-t26_1
-	-	u	CNAG_12491	CNAG_12491-t26_1
CNAG_00925	CNAG_00925-t26_1	x	CNAG_12494	CNAG_12494-t26_1
CNAG_00898	CNAG_00898-t26_1	x	CNAG_12503	CNAG_12503-t26_1
-	-	u	CNAG_12409	CNAG_12409-t26_1
CNAG_06867	CNAG_06867-t26_1	x	CNAG_12411	CNAG_12411-t26_1
CNAG_06845	CNAG_06845-t26_1	x	CNAG_12415	CNAG_12415-t26_1
-	-	u	CNAG_12427	CNAG_12427-t26_1
-	-	u	CNAG_12428	CNAG_12428-t26_1
-	-	u	CNAG_12434	CNAG_12434-t26_1
CNAG_01352	CNAG_01352-t26_1	x	CNAG_12439	CNAG_12439-t26_1
CNAG_01304	CNAG_01304-t26_1	x	CNAG_12445	CNAG_12445-t26_1
-	-	u	CNAG_12452	CNAG_12452-t26_1
CNAG_01233	CNAG_01233-t26_1	s	CNAG_12455	CNAG_12455-t26_1
CNAG_07432	CNAG_07432-t26_1	x	CNAG_12457	CNAG_12457-t26_1
CNAG_01161	CNAG_01161-t26_1	x	CNAG_12460	CNAG_12460-t26_1
CNAG_01118	CNAG_01118-t26_1	p	CNAG_12468	CNAG_12468-t26_1
-	-	u	CNAG_12470	CNAG_12470-t26_1
-	-	u	CNAG_12489	CNAG_12489-t26_1
-	-	u	CNAG_12497	CNAG_12497-t26_1
CNAG_00899	CNAG_00899-t26_1	x	CNAG_12502	CNAG_12502-t26_1
CNAG_07979	CNAG_07979-t26_1	x	CNAG_12413	CNAG_12413-t26_1
-	-	u	CNAG_12414	CNAG_12414-t26_1
CNAG_06812	CNAG_06812-t26_2	x	CNAG_12424	CNAG_12424-t26_1
-	-	u	CNAG_12429	CNAG_12429-t26_1
CNAG_07421	CNAG_07421-t26_1	x	CNAG_12435	CNAG_12435-t26_1
CNAG_01345	CNAG_01345-t26_1	x	CNAG_12441	CNAG_12441-t26_1
CNAG_01279	CNAG_01279-t26_1	x	CNAG_12449	CNAG_12449-t26_1
CNAG_01268	CNAG_01268-t26_2	x	CNAG_12451	CNAG_12451-t26_1
CNAG_01231	CNAG_01231-t26_1	x	CNAG_12456	CNAG_12456-t26_1
CNAG_01130	CNAG_01130-t26_1	x	CNAG_12463	CNAG_12463-t26_1
CNAG_01085	CNAG_01085-t26_1	x	CNAG_12473	CNAG_12473-t26_1
CNAG_01078	CNAG_01078-t26_1	x	CNAG_12475	CNAG_12475-t26_1
CNAG_00923	CNAG_00923-t26_1	x	CNAG_12495	CNAG_12495-t26_1
CNAG_00920	CNAG_00920-t26_1	x	CNAG_12496	CNAG_12496-t26_1
CNAG_00911	CNAG_00911-t26_1	x	CNAG_12500	CNAG_12500-t26_1
-	-	u	CNAG_12508	CNAG_12508-t26_1
CNAG_00883	CNAG_00883-t26_1	x	CNAG_12510	CNAG_12510-t26_1
CNAG_06869	CNAG_06869-t26_1	x	CNAG_12410	CNAG_12410-t26_1
CNAG_07399	CNAG_07399-t26_1	s	CNAG_12412	CNAG_12412-t26_1
CNAG_06843	CNAG_06843-t26_1	x	CNAG_12416	CNAG_12416-t26_1
CNAG_06814	CNAG_06814-t26_1	x	CNAG_12421	CNAG_12421-t26_1
-	-	u	CNAG_12443	CNAG_12443-t26_1
CNAG_01076	CNAG_01076-t26_1	x	CNAG_12477	CNAG_12477-t26_1
-	-	u	CNAG_12480	CNAG_12480-t26_1
-	-	u	CNAG_12483	CNAG_12483-t26_1
CNAG_00980	CNAG_00980-t26_1	x	CNAG_12488	CNAG_12488-t26_1
-	-	u	CNAG_12506	CNAG_12506-t26_1
CNAG_00885	CNAG_00885-t26_1	x	CNAG_12509	CNAG_12509-t26_1
-	-	u	CNAG_12511	CNAG_12511-t26_1
CNAG_01370	CNAG_01370-t26_1	x	CNAG_12437	CNAG_12437-t26_1
CNAG_01370	CNAG_01370-t26_1	x	CNAG_12438	CNAG_12438-t26_1
CNAG_01281	CNAG_01281-t26_1	x	CNAG_12448	CNAG_12448-t26_1
CNAG_01081	CNAG_01081-t26_1	x	CNAG_12474	CNAG_12474-t26_1
CNAG_01073	CNAG_01073-t26_1	x	CNAG_12479	CNAG_12479-t26_1
CNAG_01048	CNAG_01048-t26_1	x	CNAG_12482	CNAG_12482-t26_1
CNAG_00896	CNAG_00896-t26_1	x	CNAG_12504	CNAG_12504-t26_1
CNAG_06827	CNAG_06827-t26_1	x	CNAG_12418	CNAG_12418-t26_1
CNAG_06822	CNAG_06822-t26_1	x	CNAG_12419	CNAG_12419-t26_1
CNAG_06816	CNAG_06816-t26_1	x	CNAG_12420	CNAG_12420-t26_1
CNAG_06812	CNAG_06812-t26_2	p	CNAG_12423	CNAG_12423-t26_1
CNAG_01432	CNAG_01432-t26_1	x	CNAG_12432	CNAG_12432-t26_1
CNAG_01345	CNAG_01345-t26_1	x	CNAG_12440	CNAG_12440-t26_1
-	-	u	CNAG_12442	CNAG_12442-t26_1
CNAG_01306	CNAG_01306-t26_2	x	CNAG_12444	CNAG_12444-t26_1
CNAG_01295	CNAG_01295-t26_1	x	CNAG_12446	CNAG_12446-t26_1
CNAG_01285	CNAG_01285-t26_1	x	CNAG_12447	CNAG_12447-t26_1
CNAG_01133	CNAG_01133-t26_1	x	CNAG_12462	CNAG_12462-t26_1
-	-	u	CNAG_12465	CNAG_12465-t26_1
CNAG_01120	CNAG_01120-t26_1	x	CNAG_12466	CNAG_12466-t26_1
CNAG_01051	CNAG_01051-t26_1	x	CNAG_12481	CNAG_12481-t26_1
-	-	u	CNAG_12492	CNAG_12492-t26_1
CNAG_00934	CNAG_00934-t26_1	x	CNAG_12493	CNAG_12493-t26_1
-	-	u	CNAG_12499	CNAG_12499-t26_1
-	-	u	CNAG_12505	CNAG_12505-t26_1
CNAG_00868	CNAG_00868-t26_1	x	CNAG_12512	CNAG_12512-t26_1
CNAG_07457	CNAG_07457-t26_1	s	CNAG_12513	CNAG_12513-t26_1
CNAG_06808	CNAG_06808-t26_1	x	CNAG_12425	CNAG_12425-t26_1
CNAG_01428	CNAG_01428-t26_1	x	CNAG_12433	CNAG_12433-t26_1
CNAG_07981	CNAG_07981-t26_1	x	CNAG_12453	CNAG_12453-t26_1
CNAG_01039	CNAG_01039-t26_1	x	CNAG_12485	CNAG_12485-t26_1
CNAG_00893	CNAG_00893-t26_1	p	CNAG_12507	CNAG_12507-t26_1
CNAG_06875	CNAG_06875-t26_1	p	CNAG_12408	CNAG_12408-t26_1
CNAG_01377	CNAG_01377-t26_1	x	CNAG_12436	CNAG_12436-t26_1
-	-	u	CNAG_12454	CNAG_12454-t26_1
CNAG_01119	CNAG_01119-t26_1	x	CNAG_12467	CNAG_12467-t26_1
CNAG_01077	CNAG_01077-t26_1	x	CNAG_12476	CNAG_12476-t26_1
CNAG_00981	CNAG_00981-t26_1	x	CNAG_12487	CNAG_12487-t26_1
CNAG_00970	CNAG_00970-t26_1	x	CNAG_12490	CNAG_12490-t26_1
CNAG_07448	CNAG_07448-t26_1	s	CNAG_12498	CNAG_12498-t26_1
CNAG_00904	CNAG_00904-t26_1	s	CNAG_12501	CNAG_12501-t26_1
CNAG_02555	CNAG_02555-t26_1	x	CNAG_12514	CNAG_12514-t26_1
CNAG_02532	CNAG_02532-t26_1	x	CNAG_12516	CNAG_12516-t26_1
CNAG_02519	CNAG_02519-t26_1	p	CNAG_12520	CNAG_12520-t26_1
CNAG_07628	CNAG_07628-t26_1	x	CNAG_12536	CNAG_12536-t26_1
CNAG_02389	CNAG_02389-t26_1	x	CNAG_12549	CNAG_12549-t26_1
CNAG_02344	CNAG_02344-t26_1	s	CNAG_12557	CNAG_12557-t26_1
CNAG_02317	CNAG_02317-t26_1	x	CNAG_12561	CNAG_12561-t26_1
CNAG_02260	CNAG_02260-t26_1	x	CNAG_12568	CNAG_12568-t26_1
CNAG_02159	CNAG_02159-t26_1	p	CNAG_12582	CNAG_12582-t26_1
-	-	u	CNAG_12583	CNAG_12583-t26_1
CNAG_02124	CNAG_02124-t26_1	x	CNAG_12589	CNAG_12589-t26_1
CNAG_07648	CNAG_07648-t26_1	x	CNAG_12598	CNAG_12598-t26_1
-	-	u	CNAG_12517	CNAG_12517-t26_1
-	-	u	CNAG_12518	CNAG_12518-t26_1
CNAG_02479	CNAG_02479-t26_1	x	CNAG_12528	CNAG_12528-t26_1
CNAG_02468	CNAG_02468-t26_1	x	CNAG_12532	CNAG_12532-t26_1
CNAG_02447	CNAG_02447-t26_1	x	CNAG_12537	CNAG_12537-t26_1
CNAG_02396	CNAG_02396-t26_1	x	CNAG_12547	CNAG_12547-t26_1
-	-	u	CNAG_12551	CNAG_12551-t26_1
CNAG_02353	CNAG_02353-t26_1	x	CNAG_12556	CNAG_12556-t26_1
CNAG_02323	CNAG_02323-t26_1	x	CNAG_12560	CNAG_12560-t26_1
CNAG_07642	CNAG_07642-t26_1	p	CNAG_12565	CNAG_12565-t26_1
CNAG_07644	CNAG_07644-t26_1	x	CNAG_12570	CNAG_12570-t26_1
CNAG_02192	CNAG_02192-t26_1	x	CNAG_12578	CNAG_12578-t26_1
-	-	u	CNAG_12594	CNAG_12594-t26_1
CNAG_02051	CNAG_02051-t26_1	x	CNAG_12603	CNAG_12603-t26_1
CNAG_02031	CNAG_02031-t26_1	x	CNAG_12605	CNAG_12605-t26_1
CNAG_07624	CNAG_07624-t26_1	x	CNAG_12525	CNAG_12525-t26_1
-	-	u	CNAG_12527	CNAG_12527-t26_1
-	-	u	CNAG_12533	CNAG_12533-t26_1
CNAG_02437	CNAG_02437-t26_1	x	CNAG_12539	CNAG_12539-t26_1
CNAG_02192	CNAG_02192-t26_1	s	CNAG_12577	CNAG_12577-t26_1
CNAG_02129	CNAG_02129-t26_1	x	CNAG_12588	CNAG_12588-t26_1
CNAG_02108	CNAG_02108-t26_1	x	CNAG_12592	CNAG_12592-t26_1
CNAG_02058	CNAG_02058-t26_1	x	CNAG_12600	CNAG_12600-t26_1
CNAG_02053	CNAG_02053-t26_1	x	CNAG_12602	CNAG_12602-t26_1
CNAG_02538	CNAG_02538-t26_1	x	CNAG_12515	CNAG_12515-t26_1
-	-	u	CNAG_12545	CNAG_12545-t26_1
CNAG_02306	CNAG_02306-t26_1	x	CNAG_12563	CNAG_12563-t26_1
CNAG_02195	CNAG_02195-t26_1	x	CNAG_12575	CNAG_12575-t26_1
CNAG_02103	CNAG_02103-t26_1	x	CNAG_12593	CNAG_12593-t26_1
CNAG_02065	CNAG_02065-t26_1	x	CNAG_12599	CNAG_12599-t26_1
-	-	u	CNAG_12519	CNAG_12519-t26_1
CNAG_02496	CNAG_02496-t26_1	p	CNAG_12523	CNAG_12523-t26_1
CNAG_02436	CNAG_02436-t26_1	x	CNAG_12540	CNAG_12540-t26_1
-	-	u	CNAG_12553	CNAG_12553-t26_1
CNAG_02194	CNAG_02194-t26_1	x	CNAG_12576	CNAG_12576-t26_1
-	-	u	CNAG_12606	CNAG_12606-t26_1
CNAG_02460	CNAG_02460-t26_1	x	CNAG_12535	CNAG_12535-t26_1
CNAG_02438	CNAG_02438-t26_1	x	CNAG_12538	CNAG_12538-t26_1
-	-	u	CNAG_12544	CNAG_12544-t26_1
CNAG_02392	CNAG_02392-t26_1	x	CNAG_12548	CNAG_12548-t26_1
-	-	u	CNAG_12550	CNAG_12550-t26_1
CNAG_02362	CNAG_02362-t26_1	x	CNAG_12554	CNAG_12554-t26_1
CNAG_02361	CNAG_02361-t26_1	x	CNAG_12555	CNAG_12555-t26_1
-	-	u	CNAG_12558	CNAG_12558-t26_1
CNAG_07642	CNAG_07642-t26_1	x	CNAG_12566	CNAG_12566-t26_1
CNAG_02240	CNAG_02240-t26_1	x	CNAG_12572	CNAG_12572-t26_1
CNAG_02199	CNAG_02199-t26_1	x	CNAG_12574	CNAG_12574-t26_1
CNAG_02188	CNAG_02188-t26_1	x	CNAG_12579	CNAG_12579-t26_1
CNAG_02178	CNAG_02178-t26_1	x	CNAG_12581	CNAG_12581-t26_1
CNAG_02138	CNAG_02138-t26_1	x	CNAG_12586	CNAG_12586-t26_1
CNAG_02118	CNAG_02118-t26_1	x	CNAG_12590	CNAG_12590-t26_1
-	-	u	CNAG_12604	CNAG_12604-t26_1
CNAG_02022	CNAG_02022-t26_1	x	CNAG_12607	CNAG_12607-t26_1
-	-	u	CNAG_12521	CNAG_12521-t26_1
CNAG_02511	CNAG_02511-t26_1	p	CNAG_12522	CNAG_12522-t26_1
-	-	u	CNAG_12524	CNAG_12524-t26_1
CNAG_02470	CNAG_02470-t26_1	p	CNAG_12531	CNAG_12531-t26_1
CNAG_07627	CNAG_07627-t26_1	x	CNAG_12534	CNAG_12534-t26_1
CNAG_07984	CNAG_07984-t26_1	x	CNAG_12542	CNAG_12542-t26_1
-	-	u	CNAG_12559	CNAG_12559-t26_1
CNAG_02314	CNAG_02314-t26_1	x	CNAG_12562	CNAG_12562-t26_1
CNAG_02268	CNAG_02268-t26_1	x	CNAG_12567	CNAG_12567-t26_1
-	-	u	CNAG_12571	CNAG_12571-t26_1
CNAG_02183	CNAG_02183-t26_1	x	CNAG_12580	CNAG_12580-t26_1
CNAG_02084	CNAG_02084-t26_1	x	CNAG_12596	CNAG_12596-t26_1
CNAG_02083	CNAG_02083-t26_1	x	CNAG_12597	CNAG_12597-t26_1
CNAG_02483	CNAG_02483-t26_1	x	CNAG_12526	CNAG_12526-t26_1
-	-	u	CNAG_12529	CNAG_12529-t26_1
CNAG_07626	CNAG_07626-t26_1	x	CNAG_12530	CNAG_12530-t26_1
CNAG_02417	CNAG_02417-t26_1	x	CNAG_12541	CNAG_12541-t26_1
-	-	u	CNAG_12543	CNAG_12543-t26_1
CNAG_02397	CNAG_02397-t26_1	x	CNAG_12546	CNAG_12546-t26_1
-	-	u	CNAG_12552	CNAG_12552-t26_1
CNAG_02292	CNAG_02292-t26_1	x	CNAG_12564	CNAG_12564-t26_1
CNAG_02254	CNAG_02254-t26_1	x	CNAG_12569	CNAG_12569-t26_1
-	-	u	CNAG_12573	CNAG_12573-t26_1
CNAG_02159	CNAG_02159-t26_1	x	CNAG_12584	CNAG_12584-t26_1
CNAG_02154	CNAG_02154-t26_1	x	CNAG_12585	CNAG_12585-t26_1
CNAG_02115	CNAG_02115-t26_1	x	CNAG_12591	CNAG_12591-t26_1
CNAG_02056	CNAG_02056-t26_1	x	CNAG_12601	CNAG_12601-t26_1
-	-	u	CNAG_12608	CNAG_12608-t26_1
CNAG_07658	CNAG_07658-t26_1	x	CNAG_12616	CNAG_12616-t26_1
CNAG_07124	CNAG_07124-t26_1	x	CNAG_12618	CNAG_12618-t26_1
-	-	u	CNAG_12623	CNAG_12623-t26_1
CNAG_06590	CNAG_06590-t26_1	x	CNAG_12625	CNAG_12625-t26_1
CNAG_06607	CNAG_06607-t26_1	x	CNAG_12628	CNAG_12628-t26_1
CNAG_06612	CNAG_06612-t26_1	x	CNAG_12631	CNAG_12631-t26_1
CNAG_06639	CNAG_06639-t26_1	x	CNAG_12642	CNAG_12642-t26_1
-	-	u	CNAG_12654	CNAG_12654-t26_1
CNAG_05702	CNAG_05702-t26_1	p	CNAG_12667	CNAG_12667-t26_1
CNAG_05739	CNAG_05739-t26_1	x	CNAG_12673	CNAG_12673-t26_1
CNAG_05899	CNAG_05899-t26_1	x	CNAG_12694	CNAG_12694-t26_1
CNAG_07690	CNAG_07690-t26_1	x	CNAG_12706	CNAG_12706-t26_1
-	-	u	CNAG_12611	CNAG_12611-t26_1
CNAG_06578	CNAG_06578-t26_1	x	CNAG_12620	CNAG_12620-t26_1
-	-	u	CNAG_12626	CNAG_12626-t26_1
CNAG_06671	CNAG_06671-t26_1	p	CNAG_12646	CNAG_12646-t26_1
CNAG_07666	CNAG_07666-t26_1	x	CNAG_12656	CNAG_12656-t26_1
CNAG_05727	CNAG_05727-t26_1	x	CNAG_12670	CNAG_12670-t26_1
CNAG_05757	CNAG_05757-t26_1	x	CNAG_12674	CNAG_12674-t26_1
-	-	u	CNAG_12679	CNAG_12679-t26_1
CNAG_05787	CNAG_05787-t26_1	x	CNAG_12680	CNAG_12680-t26_1
CNAG_07678	CNAG_07678-t26_1	x	CNAG_12687	CNAG_12687-t26_1
CNAG_05886	CNAG_05886-t26_1	x	CNAG_12691	CNAG_12691-t26_1
CNAG_05903	CNAG_05903-t26_1	x	CNAG_12695	CNAG_12695-t26_1
CNAG_05924	CNAG_05924-t26_1	x	CNAG_12701	CNAG_12701-t26_1
-	-	u	CNAG_12704	CNAG_12704-t26_1
CNAG_06563	CNAG_06563-t26_1	x	CNAG_12614	CNAG_12614-t26_1
CNAG_07664	CNAG_07664-t26_1	x	CNAG_12635	CNAG_12635-t26_1
-	-	u	CNAG_12636	CNAG_12636-t26_1
CNAG_06674	CNAG_06674-t26_1	x	CNAG_12648	CNAG_12648-t26_1
CNAG_07176	CNAG_07176-t26_1	x	CNAG_12651	CNAG_12651-t26_1
CNAG_05708	CNAG_05708-t26_1	x	CNAG_12668	CNAG_12668-t26_1
CNAG_05760	CNAG_05760-t26_1	x	CNAG_12675	CNAG_12675-t26_1
-	-	u	CNAG_12684	CNAG_12684-t26_1
CNAG_07678	CNAG_07678-t26_1	x	CNAG_12686	CNAG_12686-t26_1
CNAG_07658	CNAG_07658-t26_1	x	CNAG_12615	CNAG_12615-t26_1
CNAG_06588	CNAG_06588-t26_1	x	CNAG_12624	CNAG_12624-t26_1
CNAG_06648	CNAG_06648-t26_1	p	CNAG_12643	CNAG_12643-t26_1
CNAG_06672	CNAG_06672-t26_1	s	CNAG_12647	CNAG_12647-t26_1
CNAG_06678	CNAG_06678-t26_1	x	CNAG_12650	CNAG_12650-t26_1
CNAG_05677	CNAG_05677-t26_1	x	CNAG_12658	CNAG_12658-t26_1
CNAG_05686	CNAG_05686-t26_1	x	CNAG_12663	CNAG_12663-t26_1
CNAG_05687	CNAG_05687-t26_1	x	CNAG_12664	CNAG_12664-t26_1
-	-	u	CNAG_12666	CNAG_12666-t26_1
-	-	u	CNAG_12669	CNAG_12669-t26_1
CNAG_05791	CNAG_05791-t26_1	x	CNAG_12681	CNAG_12681-t26_1
-	-	u	CNAG_12708	CNAG_12708-t26_1
CNAG_07699	CNAG_07699-t26_1	x	CNAG_12709	CNAG_12709-t26_1
CNAG_05966	CNAG_05966-t26_1	x	CNAG_12710	CNAG_12710-t26_1
CNAG_06531	CNAG_06531-t26_1	s	CNAG_12609	CNAG_12609-t26_1
CNAG_06609	CNAG_06609-t26_1	x	CNAG_12629	CNAG_12629-t26_1
-	-	u	CNAG_12639	CNAG_12639-t26_1
-	-	u	CNAG_12655	CNAG_12655-t26_1
CNAG_05678	CNAG_05678-t26_1	s	CNAG_12659	CNAG_12659-t26_1
-	-	u	CNAG_12661	CNAG_12661-t26_1
CNAG_05813	CNAG_05813-t26_1	x	CNAG_12682	CNAG_12682-t26_1
CNAG_05891	CNAG_05891-t26_1	x	CNAG_12692	CNAG_12692-t26_1
CNAG_05896	CNAG_05896-t26_1	x	CNAG_12693	CNAG_12693-t26_1
CNAG_05910	CNAG_05910-t26_1	x	CNAG_12697	CNAG_12697-t26_1
CNAG_05911	CNAG_05911-t26_1	x	CNAG_12698	CNAG_12698-t26_1
CNAG_05921	CNAG_05921-t26_1	s	CNAG_12699	CNAG_12699-t26_1
-	-	u	CNAG_12702	CNAG_12702-t26_1
-	-	u	CNAG_12619	CNAG_12619-t26_1
CNAG_07661	CNAG_07661-t26_1	x	CNAG_12622	CNAG_12622-t26_1
CNAG_06601	CNAG_06601-t26_1	x	CNAG_12627	CNAG_12627-t26_1
CNAG_06611	CNAG_06611-t26_1	x	CNAG_12630	CNAG_12630-t26_1
-	-	u	CNAG_12632	CNAG_12632-t26_1
-	-	u	CNAG_12637	CNAG_12637-t26_1
CNAG_06636	CNAG_06636-t26_1	x	CNAG_12641	CNAG_12641-t26_1
CNAG_06665	CNAG_06665-t26_1	x	CNAG_12645	CNAG_12645-t26_1
CNAG_05730	CNAG_05730-t26_1	x	CNAG_12671	CNAG_12671-t26_1
CNAG_05734	CNAG_05734-t26_1	p	CNAG_12672	CNAG_12672-t26_1
CNAG_05784	CNAG_05784-t26_1	x	CNAG_12678	CNAG_12678-t26_1
CNAG_05820	CNAG_05820-t26_1	s	CNAG_12683	CNAG_12683-t26_1
CNAG_05838	CNAG_05838-t26_1	x	CNAG_12685	CNAG_12685-t26_1
CNAG_05973	CNAG_05973-t26_1	x	CNAG_12712	CNAG_12712-t26_1
-	-	u	CNAG_12713	CNAG_12713-t26_1
CNAG_06535	CNAG_06535-t26_1	x	CNAG_12610	CNAG_12610-t26_1
CNAG_07657	CNAG_07657-t26_1	x	CNAG_12612	CNAG_12612-t26_1
CNAG_07657	CNAG_07657-t26_1	x	CNAG_12613	CNAG_12613-t26_1
CNAG_06634	CNAG_06634-t26_1	x	CNAG_12640	CNAG_12640-t26_1
-	-	u	CNAG_12660	CNAG_12660-t26_1
CNAG_05693	CNAG_05693-t26_1	s	CNAG_12665	CNAG_12665-t26_1
CNAG_05761	CNAG_05761-t26_1	x	CNAG_12676	CNAG_12676-t26_1
CNAG_05865	CNAG_05865-t26_1	x	CNAG_12688	CNAG_12688-t26_1
CNAG_05873	CNAG_05873-t26_1	x	CNAG_12690	CNAG_12690-t26_1
CNAG_05908	CNAG_05908-t26_1	x	CNAG_12696	CNAG_12696-t26_1
CNAG_07682	CNAG_07682-t26_1	x	CNAG_12700	CNAG_12700-t26_1
CNAG_05940	CNAG_05940-t26_1	x	CNAG_12703	CNAG_12703-t26_1
CNAG_07686	CNAG_07686-t26_1	x	CNAG_12705	CNAG_12705-t26_1
CNAG_07691	CNAG_07691-t26_1	x	CNAG_12707	CNAG_12707-t26_1
CNAG_06570	CNAG_06570-t26_1	x	CNAG_12617	CNAG_12617-t26_1
CNAG_07989	CNAG_07989-t26_1	x	CNAG_12621	CNAG_12621-t26_1
-	-	u	CNAG_12633	CNAG_12633-t26_1
CNAG_06662	CNAG_06662-t26_1	x	CNAG_12644	CNAG_12644-t26_1
CNAG_06677	CNAG_06677-t26_1	x	CNAG_12649	CNAG_12649-t26_1
CNAG_06687	CNAG_06687-t26_1	x	CNAG_12652	CNAG_12652-t26_1
-	-	u	CNAG_12653	CNAG_12653-t26_1
CNAG_05676	CNAG_05676-t26_1	x	CNAG_12657	CNAG_12657-t26_1
-	-	u	CNAG_12662	CNAG_12662-t26_1
CNAG_05774	CNAG_05774-t26_2	x	CNAG_12677	CNAG_12677-t26_1
CNAG_05869	CNAG_05869-t26_1	x	CNAG_12689	CNAG_12689-t26_1
CNAG_05972	CNAG_05972-t26_1	x	CNAG_12711	CNAG_12711-t26_1
-	-	u	CNAG_12714	CNAG_12714-t26_1
-	-	u	CNAG_12720	CNAG_12720-t26_1
CNAG_03137	CNAG_03137-t26_1	x	CNAG_12722	CNAG_12722-t26_1
CNAG_03150	CNAG_03150-t26_1	x	CNAG_12725	CNAG_12725-t26_1
-	-	u	CNAG_12731	CNAG_12731-t26_1
CNAG_03243	CNAG_03243-t26_1	x	CNAG_12744	CNAG_12744-t26_1
CNAG_03252	CNAG_03252-t26_1	x	CNAG_12747	CNAG_12747-t26_1
CNAG_07722	CNAG_07722-t26_1	x	CNAG_12751	CNAG_12751-t26_1
CNAG_03347	CNAG_03347-t26_1	p	CNAG_12757	CNAG_12757-t26_1
-	-	u	CNAG_12767	CNAG_12767-t26_1
CNAG_03433	CNAG_03433-t26_1	x	CNAG_12768	CNAG_12768-t26_1
CNAG_07733	CNAG_07733-t26_1	x	CNAG_12770	CNAG_12770-t26_1
CNAG_03446	CNAG_03446-t26_1	x	CNAG_12771	CNAG_12771-t26_1
CNAG_03453	CNAG_03453-t26_1	x	CNAG_12772	CNAG_12772-t26_1
CNAG_07736	CNAG_07736-t26_1	x	CNAG_12779	CNAG_12779-t26_1
CNAG_07738	CNAG_07738-t26_1	x	CNAG_12780	CNAG_12780-t26_1
CNAG_03504	CNAG_03504-t26_1	x	CNAG_12790	CNAG_12790-t26_1
CNAG_03569	CNAG_03569-t26_1	x	CNAG_12800	CNAG_12800-t26_1
-	-	u	CNAG_12727	CNAG_12727-t26_1
CNAG_03166	CNAG_03166-t26_1	x	CNAG_12729	CNAG_12729-t26_1
CNAG_03177	CNAG_03177-t26_1	x	CNAG_12732	CNAG_12732-t26_1
-	-	u	CNAG_12733	CNAG_12733-t26_1
-	-	u	CNAG_12736	CNAG_12736-t26_1
CNAG_03212	CNAG_03212-t26_1	x	CNAG_12737	CNAG_12737-t26_1
-	-	u	CNAG_12740	CNAG_12740-t26_1
-	-	u	CNAG_12748	CNAG_12748-t26_1
-	-	u	CNAG_12750	CNAG_12750-t26_1
CNAG_03354	CNAG_03354-t26_1	x	CNAG_12758	CNAG_12758-t26_1
-	-	u	CNAG_12761	CNAG_12761-t26_1
CNAG_03437	CNAG_03437-t26_1	x	CNAG_12769	CNAG_12769-t26_1
-	-	u	CNAG_12776	CNAG_12776-t26_1
CNAG_03494	CNAG_03494-t26_1	x	CNAG_12785	CNAG_12785-t26_1
CNAG_03495	CNAG_03495-t26_1	x	CNAG_12786	CNAG_12786-t26_1
CNAG_03498	CNAG_03498-t26_1	x	CNAG_12787	CNAG_12787-t26_1
CNAG_03499	CNAG_03499-t26_1	x	CNAG_12788	CNAG_12788-t26_1
-	-	u	CNAG_12801	CNAG_12801-t26_1
-	-	u	CNAG_12802	CNAG_12802-t26_1
-	-	u	CNAG_12803	CNAG_12803-t26_1
-	-	u	CNAG_12715	CNAG_12715-t26_1
CNAG_03107	CNAG_03107-t26_1	x	CNAG_12716	CNAG_12716-t26_1
CNAG_03179	CNAG_03179-t26_1	x	CNAG_12734	CNAG_12734-t26_1
CNAG_03305	CNAG_03305-t26_1	x	CNAG_12753	CNAG_12753-t26_1
CNAG_03397	CNAG_03397-t26_1	x	CNAG_12765	CNAG_12765-t26_1
-	-	u	CNAG_12783	CNAG_12783-t26_1
-	-	u	CNAG_12796	CNAG_12796-t26_1
CNAG_03552	CNAG_03552-t26_1	x	CNAG_12799	CNAG_12799-t26_1
-	-	u	CNAG_12806	CNAG_12806-t26_1
-	-	u	CNAG_12809	CNAG_12809-t26_1
CNAG_03141	CNAG_03141-t26_1	x	CNAG_12723	CNAG_12723-t26_1
CNAG_03169	CNAG_03169-t26_1	x	CNAG_12730	CNAG_12730-t26_1
CNAG_03222	CNAG_03222-t26_1	x	CNAG_12738	CNAG_12738-t26_1
CNAG_03224	CNAG_03224-t26_1	x	CNAG_12739	CNAG_12739-t26_1
CNAG_03265	CNAG_03265-t26_1	x	CNAG_12749	CNAG_12749-t26_1
-	-	u	CNAG_12752	CNAG_12752-t26_1
CNAG_03365	CNAG_03365-t26_1	x	CNAG_12759	CNAG_12759-t26_1
CNAG_03366	CNAG_03366-t26_1	x	CNAG_12760	CNAG_12760-t26_1
CNAG_03150	CNAG_03150-t26_1	x	CNAG_12724	CNAG_12724-t26_1
CNAG_03160	CNAG_03160-t26_2	s	CNAG_12728	CNAG_12728-t26_1
CNAG_03231	CNAG_03231-t26_1	x	CNAG_12742	CNAG_12742-t26_1
CNAG_07725	CNAG_07725-t26_2	x	CNAG_12762	CNAG_12762-t26_1
CNAG_03464	CNAG_03464-t26_1	x	CNAG_12775	CNAG_12775-t26_1
CNAG_03477	CNAG_03477-t26_1	x	CNAG_12781	CNAG_12781-t26_1
CNAG_03500	CNAG_03500-t26_1	x	CNAG_12789	CNAG_12789-t26_1
-	-	u	CNAG_12718	CNAG_12718-t26_1
-	-	u	CNAG_12719	CNAG_12719-t26_1
-	-	u	CNAG_12721	CNAG_12721-t26_1
CNAG_03241	CNAG_03241-t26_1	x	CNAG_12743	CNAG_12743-t26_1
-	-	u	CNAG_12745	CNAG_12745-t26_1
-	-	u	CNAG_12746	CNAG_12746-t26_1
-	-	u	CNAG_12755	CNAG_12755-t26_1
CNAG_03387	CNAG_03387-t26_1	x	CNAG_12763	CNAG_12763-t26_1
CNAG_07729	CNAG_07729-t26_1	x	CNAG_12766	CNAG_12766-t26_1
CNAG_03454	CNAG_03454-t26_1	x	CNAG_12773	CNAG_12773-t26_1
CNAG_03464	CNAG_03464-t26_1	x	CNAG_12774	CNAG_12774-t26_1
CNAG_03478	CNAG_03478-t26_1	x	CNAG_12782	CNAG_12782-t26_1
CNAG_03491	CNAG_03491-t26_1	x	CNAG_12784	CNAG_12784-t26_1
-	-	u	CNAG_12795	CNAG_12795-t26_1
CNAG_07749	CNAG_07749-t26_1	x	CNAG_12805	CNAG_12805-t26_1
CNAG_06976	CNAG_06976-t26_1	x	CNAG_12807	CNAG_12807-t26_1
-	-	u	CNAG_12726	CNAG_12726-t26_1
CNAG_03230	CNAG_03230-t26_2	x	CNAG_12741	CNAG_12741-t26_1
-	-	u	CNAG_12756	CNAG_12756-t26_1
CNAG_07734	CNAG_07734-t26_1	x	CNAG_12778	CNAG_12778-t26_1
CNAG_03516	CNAG_03516-t26_1	x	CNAG_12791	CNAG_12791-t26_1
-	-	u	CNAG_12792	CNAG_12792-t26_1
CNAG_03545	CNAG_03545-t26_1	x	CNAG_12797	CNAG_12797-t26_1
-	-	u	CNAG_12808	CNAG_12808-t26_1
CNAG_07994	CNAG_07994-t26_1	x	CNAG_12717	CNAG_12717-t26_1
CNAG_03197	CNAG_03197-t26_1	x	CNAG_12735	CNAG_12735-t26_1
CNAG_03308	CNAG_03308-t26_1	x	CNAG_12754	CNAG_12754-t26_1
-	-	u	CNAG_12764	CNAG_12764-t26_1
-	-	u	CNAG_12777	CNAG_12777-t26_1
CNAG_03518	CNAG_03518-t26_1	x	CNAG_12793	CNAG_12793-t26_1
CNAG_03538	CNAG_03538-t26_1	x	CNAG_12794	CNAG_12794-t26_1
CNAG_03548	CNAG_03548-t26_1	x	CNAG_12798	CNAG_12798-t26_1
CNAG_07747	CNAG_07747-t26_1	x	CNAG_12804	CNAG_12804-t26_1
CNAG_04130	CNAG_04130-t26_1	x	CNAG_12817	CNAG_12817-t26_1
CNAG_04154	CNAG_04154-t26_1	x	CNAG_12822	CNAG_12822-t26_1
CNAG_04170	CNAG_04170-t26_1	x	CNAG_12823	CNAG_12823-t26_1
CNAG_04340	CNAG_04340-t26_1	x	CNAG_12844	CNAG_12844-t26_1
CNAG_04454	CNAG_04454-t26_1	x	CNAG_12854	CNAG_12854-t26_1
-	-	u	CNAG_12861	CNAG_12861-t26_1
-	-	u	CNAG_12864	CNAG_12864-t26_1
CNAG_04528	CNAG_04528-t26_1	x	CNAG_12872	CNAG_12872-t26_1
-	-	u	CNAG_12825	CNAG_12825-t26_1
-	-	u	CNAG_12827	CNAG_12827-t26_1
CNAG_04187	CNAG_04187-t26_1	x	CNAG_12829	CNAG_12829-t26_1
CNAG_04205	CNAG_04205-t26_1	p	CNAG_12830	CNAG_12830-t26_1
-	-	u	CNAG_12831	CNAG_12831-t26_1
CNAG_04242	CNAG_04242-t26_1	x	CNAG_12834	CNAG_12834-t26_1
CNAG_04349	CNAG_04349-t26_1	x	CNAG_12847	CNAG_12847-t26_1
-	-	u	CNAG_12869	CNAG_12869-t26_1
CNAG_04109	CNAG_04109-t26_1	x	CNAG_12811	CNAG_12811-t26_1
CNAG_04124	CNAG_04124-t26_1	x	CNAG_12816	CNAG_12816-t26_1
CNAG_04247	CNAG_04247-t26_1	x	CNAG_12836	CNAG_12836-t26_1
CNAG_04284	CNAG_04284-t26_1	x	CNAG_12840	CNAG_12840-t26_1
CNAG_04457	CNAG_04457-t26_1	x	CNAG_12855	CNAG_12855-t26_1
CNAG_04506	CNAG_04506-t26_1	x	CNAG_12867	CNAG_12867-t26_1
CNAG_04515	CNAG_04515-t26_1	x	CNAG_12868	CNAG_12868-t26_1
CNAG_04519	CNAG_04519-t26_1	s	CNAG_12871	CNAG_12871-t26_1
-	-	u	CNAG_12876	CNAG_12876-t26_1
-	-	u	CNAG_12877	CNAG_12877-t26_1
-	-	u	CNAG_12812	CNAG_12812-t26_1
-	-	u	CNAG_12819	CNAG_12819-t26_1
CNAG_04140	CNAG_04140-t26_1	x	CNAG_12820	CNAG_12820-t26_1
CNAG_04268	CNAG_04268-t26_1	x	CNAG_12838	CNAG_12838-t26_1
-	-	u	CNAG_12851	CNAG_12851-t26_1
CNAG_04505	CNAG_04505-t26_1	x	CNAG_12866	CNAG_12866-t26_1
-	-	u	CNAG_12870	CNAG_12870-t26_1
CNAG_04102	CNAG_04102-t26_1	x	CNAG_12810	CNAG_12810-t26_1
CNAG_04118	CNAG_04118-t26_1	x	CNAG_12813	CNAG_12813-t26_1
-	-	u	CNAG_12824	CNAG_12824-t26_1
CNAG_04463	CNAG_04463-t26_1	x	CNAG_12860	CNAG_12860-t26_1
CNAG_04466	CNAG_04466-t26_1	p	CNAG_12862	CNAG_12862-t26_1
CNAG_07776	CNAG_07776-t26_1	x	CNAG_12865	CNAG_12865-t26_1
-	-	u	CNAG_12814	CNAG_12814-t26_1
CNAG_04227	CNAG_04227-t26_1	x	CNAG_12833	CNAG_12833-t26_1
-	-	u	CNAG_12835	CNAG_12835-t26_1
CNAG_04274	CNAG_04274-t26_1	x	CNAG_12839	CNAG_12839-t26_1
-	-	u	CNAG_12843	CNAG_12843-t26_1
CNAG_04363	CNAG_04363-t26_1	x	CNAG_12848	CNAG_12848-t26_1
CNAG_04416	CNAG_04416-t26_1	x	CNAG_12850	CNAG_12850-t26_1
-	-	u	CNAG_12852	CNAG_12852-t26_1
CNAG_04459	CNAG_04459-t26_1	x	CNAG_12856	CNAG_12856-t26_1
-	-	u	CNAG_12875	CNAG_12875-t26_1
CNAG_04122	CNAG_04122-t26_1	x	CNAG_12815	CNAG_12815-t26_1
CNAG_04143	CNAG_04143-t26_1	x	CNAG_12821	CNAG_12821-t26_1
-	-	u	CNAG_12826	CNAG_12826-t26_1
CNAG_04263	CNAG_04263-t26_1	x	CNAG_12837	CNAG_12837-t26_1
CNAG_04291	CNAG_04291-t26_1	s	CNAG_12841	CNAG_12841-t26_1
-	-	u	CNAG_12842	CNAG_12842-t26_1
CNAG_04343	CNAG_04343-t26_1	x	CNAG_12845	CNAG_12845-t26_1
CNAG_04374	CNAG_04374-t26_1	x	CNAG_12849	CNAG_12849-t26_1
CNAG_04461	CNAG_04461-t26_1	x	CNAG_12857	CNAG_12857-t26_1
CNAG_04461	CNAG_04461-t26_1	s	CNAG_12858	CNAG_12858-t26_1
CNAG_04546	CNAG_04546-t26_1	s	CNAG_12873	CNAG_12873-t26_1
-	-	u	CNAG_12818	CNAG_12818-t26_1
CNAG_04182	CNAG_04182-t26_1	x	CNAG_12828	CNAG_12828-t26_1
CNAG_04216	CNAG_04216-t26_1	x	CNAG_12832	CNAG_12832-t26_1
-	-	u	CNAG_12846	CNAG_12846-t26_1
-	-	u	CNAG_12853	CNAG_12853-t26_1
CNAG_04469	CNAG_04469-t26_1	x	CNAG_12863	CNAG_12863-t26_1
CNAG_06997	CNAG_06997-t26_1	s	CNAG_12874	CNAG_12874-t26_1
CNAG_07843	CNAG_07843-t26_1	x	CNAG_12881	CNAG_12881-t26_1
CNAG_04865	CNAG_04865-t26_1	x	CNAG_12887	CNAG_12887-t26_1
CNAG_04865	CNAG_04865-t26_1	x	CNAG_12888	CNAG_12888-t26_1
-	-	u	CNAG_12900	CNAG_12900-t26_1
CNAG_04765	CNAG_04765-t26_1	x	CNAG_12908	CNAG_12908-t26_1
CNAG_07854	CNAG_07854-t26_1	x	CNAG_12916	CNAG_12916-t26_1
CNAG_04708	CNAG_04708-t26_1	x	CNAG_12925	CNAG_12925-t26_1
CNAG_04673	CNAG_04673-t26_1	x	CNAG_12930	CNAG_12930-t26_1
CNAG_04659	CNAG_04659-t26_1	s	CNAG_12933	CNAG_12933-t26_1
CNAG_04610	CNAG_04610-t26_1	x	CNAG_12942	CNAG_12942-t26_1
CNAG_04870	CNAG_04870-t26_1	x	CNAG_12886	CNAG_12886-t26_1
CNAG_04862	CNAG_04862-t26_1	x	CNAG_12890	CNAG_12890-t26_1
CNAG_04827	CNAG_04827-t26_1	p	CNAG_12895	CNAG_12895-t26_1
-	-	u	CNAG_12919	CNAG_12919-t26_1
CNAG_04718	CNAG_04718-t26_1	x	CNAG_12922	CNAG_12922-t26_1
CNAG_04691	CNAG_04691-t26_1	x	CNAG_12928	CNAG_12928-t26_1
-	-	u	CNAG_12935	CNAG_12935-t26_1
CNAG_04920	CNAG_04920-t26_1	x	CNAG_12878	CNAG_12878-t26_1
CNAG_04841	CNAG_04841-t26_1	x	CNAG_12893	CNAG_12893-t26_1
-	-	u	CNAG_12894	CNAG_12894-t26_1
CNAG_07847	CNAG_07847-t26_1	x	CNAG_12897	CNAG_12897-t26_1
-	-	u	CNAG_12898	CNAG_12898-t26_1
CNAG_07849	CNAG_07849-t26_1	x	CNAG_12904	CNAG_12904-t26_1
-	-	u	CNAG_12912	CNAG_12912-t26_1
CNAG_04736	CNAG_04736-t26_1	x	CNAG_12917	CNAG_12917-t26_1
CNAG_04633	CNAG_04633-t26_1	x	CNAG_12937	CNAG_12937-t26_1
-	-	u	CNAG_12945	CNAG_12945-t26_1
CNAG_04916	CNAG_04916-t26_1	x	CNAG_12879	CNAG_12879-t26_1
CNAG_04909	CNAG_04909-t26_1	x	CNAG_12880	CNAG_12880-t26_1
CNAG_04805	CNAG_04805-t26_1	x	CNAG_12901	CNAG_12901-t26_1
CNAG_04787	CNAG_04787-t26_1	x	CNAG_12903	CNAG_12903-t26_1
CNAG_04773	CNAG_04773-t26_1	s	CNAG_12906	CNAG_12906-t26_1
CNAG_04759	CNAG_04759-t26_2	x	CNAG_12909	CNAG_12909-t26_1
-	-	u	CNAG_12915	CNAG_12915-t26_1
CNAG_04619	CNAG_04619-t26_1	x	CNAG_12940	CNAG_12940-t26_1
CNAG_04877	CNAG_04877-t26_1	x	CNAG_12885	CNAG_12885-t26_1
CNAG_04824	CNAG_04824-t26_1	x	CNAG_12896	CNAG_12896-t26_1
CNAG_04753	CNAG_04753-t26_1	x	CNAG_12914	CNAG_12914-t26_1
-	-	u	CNAG_12918	CNAG_12918-t26_1
CNAG_04718	CNAG_04718-t26_1	x	CNAG_12921	CNAG_12921-t26_1
CNAG_04596	CNAG_04596-t26_1	x	CNAG_12943	CNAG_12943-t26_1
-	-	u	CNAG_12946	CNAG_12946-t26_1
CNAG_04552	CNAG_04552-t26_1	x	CNAG_12947	CNAG_12947-t26_1
CNAG_04850	CNAG_04850-t26_1	s	CNAG_12892	CNAG_12892-t26_1
CNAG_04810	CNAG_04810-t26_1	x	CNAG_12899	CNAG_12899-t26_1
CNAG_04758	CNAG_04758-t26_1	x	CNAG_12910	CNAG_12910-t26_1
CNAG_07852	CNAG_07852-t26_1	p	CNAG_12913	CNAG_12913-t26_1
CNAG_04717	CNAG_04717-t26_1	p	CNAG_12923	CNAG_12923-t26_1
CNAG_04695	CNAG_04695-t26_1	p	CNAG_12927	CNAG_12927-t26_1
CNAG_08000	CNAG_08000-t26_1	x	CNAG_12932	CNAG_12932-t26_1
-	-	u	CNAG_12936	CNAG_12936-t26_1
CNAG_04591	CNAG_04591-t26_1	x	CNAG_12944	CNAG_12944-t26_1
CNAG_04885	CNAG_04885-t26_1	x	CNAG_12883	CNAG_12883-t26_1
-	-	u	CNAG_12884	CNAG_12884-t26_1
CNAG_04850	CNAG_04850-t26_1	x	CNAG_12891	CNAG_12891-t26_1
CNAG_04792	CNAG_04792-t26_1	x	CNAG_12902	CNAG_12902-t26_1
-	-	u	CNAG_12905	CNAG_12905-t26_1
CNAG_04772	CNAG_04772-t26_1	x	CNAG_12907	CNAG_12907-t26_1
CNAG_04756	CNAG_04756-t26_1	x	CNAG_12911	CNAG_12911-t26_1
CNAG_04716	CNAG_04716-t26_1	x	CNAG_12924	CNAG_12924-t26_1
CNAG_04674	CNAG_04674-t26_1	x	CNAG_12929	CNAG_12929-t26_1
CNAG_08000	CNAG_08000-t26_1	x	CNAG_12931	CNAG_12931-t26_1
-	-	u	CNAG_12934	CNAG_12934-t26_1
CNAG_04632	CNAG_04632-t26_1	x	CNAG_12938	CNAG_12938-t26_1
CNAG_04629	CNAG_04629-t26_1	x	CNAG_12939	CNAG_12939-t26_1
CNAG_04897	CNAG_04897-t26_1	x	CNAG_12882	CNAG_12882-t26_1
-	-	u	CNAG_12889	CNAG_12889-t26_1
-	-	u	CNAG_12920	CNAG_12920-t26_1
CNAG_04704	CNAG_04704-t26_1	x	CNAG_12926	CNAG_12926-t26_1
-	-	u	CNAG_12941	CNAG_12941-t26_1
CNAG_01714	CNAG_01714-t26_1	x	CNAG_12995	CNAG_12995-t26_1
CNAG_01760	CNAG_01760-t26_1	x	CNAG_13000	CNAG_13000-t26_1
-	-	u	CNAG_13002	CNAG_13002-t26_1
CNAG_01909	CNAG_01909-t26_1	x	CNAG_13021	CNAG_13021-t26_1
-	-	u	CNAG_13024	CNAG_13024-t26_1
-	-	u	CNAG_13043	CNAG_13043-t26_1
-	-	u	CNAG_12949	CNAG_12949-t26_1
-	-	u	CNAG_12953	CNAG_12953-t26_1
CNAG_01481	CNAG_01481-t26_1	x	CNAG_12955	CNAG_12955-t26_1
-	-	u	CNAG_12963	CNAG_12963-t26_1
CNAG_01524	CNAG_01524-t26_1	x	CNAG_12966	CNAG_12966-t26_1
CNAG_01572	CNAG_01572-t26_1	x	CNAG_12973	CNAG_12973-t26_1
-	-	u	CNAG_12975	CNAG_12975-t26_1
CNAG_01654	CNAG_01654-t26_1	x	CNAG_12981	CNAG_12981-t26_1
CNAG_01663	CNAG_01663-t26_1	x	CNAG_12982	CNAG_12982-t26_1
CNAG_01681	CNAG_01681-t26_1	p	CNAG_12987	CNAG_12987-t26_1
-	-	u	CNAG_12989	CNAG_12989-t26_1
CNAG_01694	CNAG_01694-t26_1	p	CNAG_12993	CNAG_12993-t26_1
-	-	u	CNAG_12994	CNAG_12994-t26_1
-	-	u	CNAG_13003	CNAG_13003-t26_1
CNAG_01933	CNAG_01933-t26_1	x	CNAG_13027	CNAG_13027-t26_1
CNAG_08010	CNAG_08010-t26_1	x	CNAG_13028	CNAG_13028-t26_1
CNAG_01936	CNAG_01936-t26_1	x	CNAG_13029	CNAG_13029-t26_1
CNAG_01939	CNAG_01939-t26_1	x	CNAG_13030	CNAG_13030-t26_1
CNAG_01939	CNAG_01939-t26_1	x	CNAG_13031	CNAG_13031-t26_1
-	-	u	CNAG_13040	CNAG_13040-t26_1
CNAG_01985	CNAG_01985-t26_1	p	CNAG_13042	CNAG_13042-t26_1
CNAG_01465	CNAG_01465-t26_1	x	CNAG_12950	CNAG_12950-t26_1
-	-	u	CNAG_12957	CNAG_12957-t26_1
-	-	u	CNAG_12959	CNAG_12959-t26_1
CNAG_01654	CNAG_01654-t26_1	x	CNAG_12980	CNAG_12980-t26_1
CNAG_01674	CNAG_01674-t26_1	x	CNAG_12983	CNAG_12983-t26_1
-	-	u	CNAG_12985	CNAG_12985-t26_1
-	-	u	CNAG_12998	CNAG_12998-t26_1
-	-	u	CNAG_13008	CNAG_13008-t26_1
CNAG_01931	CNAG_01931-t26_1	p	CNAG_13025	CNAG_13025-t26_1
CNAG_01931	CNAG_01931-t26_1	x	CNAG_13026	CNAG_13026-t26_1
CNAG_01952	CNAG_01952-t26_1	x	CNAG_13034	CNAG_13034-t26_1
CNAG_01973	CNAG_01973-t26_1	x	CNAG_13039	CNAG_13039-t26_1
-	-	u	CNAG_12951	CNAG_12951-t26_1
-	-	u	CNAG_12997	CNAG_12997-t26_1
CNAG_07612	CNAG_07612-t26_1	x	CNAG_13015	CNAG_13015-t26_1
CNAG_01916	CNAG_01916-t26_1	x	CNAG_13022	CNAG_13022-t26_1
CNAG_01955	CNAG_01955-t26_1	x	CNAG_13036	CNAG_13036-t26_1
CNAG_01970	CNAG_01970-t26_1	p	CNAG_13038	CNAG_13038-t26_1
-	-	u	CNAG_13041	CNAG_13041-t26_1
CNAG_01502	CNAG_01502-t26_1	x	CNAG_12961	CNAG_12961-t26_1
CNAG_01540	CNAG_01540-t26_1	x	CNAG_12970	CNAG_12970-t26_1
CNAG_01556	CNAG_01556-t26_1	x	CNAG_12971	CNAG_12971-t26_1
CNAG_01622	CNAG_01622-t26_1	p	CNAG_12978	CNAG_12978-t26_1
CNAG_01680	CNAG_01680-t26_1	x	CNAG_12984	CNAG_12984-t26_1
CNAG_01687	CNAG_01687-t26_1	x	CNAG_12990	CNAG_12990-t26_1
-	-	u	CNAG_13032	CNAG_13032-t26_1
-	-	u	CNAG_12948	CNAG_12948-t26_1
CNAG_01494	CNAG_01494-t26_1	x	CNAG_12960	CNAG_12960-t26_1
-	-	u	CNAG_12962	CNAG_12962-t26_1
CNAG_01522	CNAG_01522-t26_1	x	CNAG_12965	CNAG_12965-t26_1
CNAG_01571	CNAG_01571-t26_1	x	CNAG_12972	CNAG_12972-t26_1
CNAG_07592	CNAG_07592-t26_1	x	CNAG_12976	CNAG_12976-t26_1
CNAG_01611	CNAG_01611-t26_1	x	CNAG_12977	CNAG_12977-t26_1
CNAG_01725	CNAG_01725-t26_1	x	CNAG_12996	CNAG_12996-t26_1
CNAG_01736	CNAG_01736-t26_1	x	CNAG_12999	CNAG_12999-t26_1
CNAG_07604	CNAG_07604-t26_1	x	CNAG_13001	CNAG_13001-t26_1
CNAG_01827	CNAG_01827-t26_2	x	CNAG_13009	CNAG_13009-t26_1
-	-	u	CNAG_13014	CNAG_13014-t26_1
CNAG_01897	CNAG_01897-t26_1	x	CNAG_13016	CNAG_13016-t26_1
CNAG_01920	CNAG_01920-t26_1	p	CNAG_13023	CNAG_13023-t26_1
-	-	u	CNAG_13044	CNAG_13044-t26_1
-	-	u	CNAG_12958	CNAG_12958-t26_1
CNAG_01527	CNAG_01527-t26_1	s	CNAG_12968	CNAG_12968-t26_1
CNAG_01536	CNAG_01536-t26_1	x	CNAG_12969	CNAG_12969-t26_1
-	-	u	CNAG_12988	CNAG_12988-t26_1
CNAG_01689	CNAG_01689-t26_2	x	CNAG_12991	CNAG_12991-t26_1
CNAG_01792	CNAG_01792-t26_1	x	CNAG_13005	CNAG_13005-t26_1
CNAG_01792	CNAG_01792-t26_1	x	CNAG_13006	CNAG_13006-t26_1
CNAG_01806	CNAG_01806-t26_1	s	CNAG_13007	CNAG_13007-t26_1
CNAG_01849	CNAG_01849-t26_1	x	CNAG_13011	CNAG_13011-t26_1
CNAG_01852	CNAG_01852-t26_1	x	CNAG_13012	CNAG_13012-t26_1
CNAG_01901	CNAG_01901-t26_1	x	CNAG_13017	CNAG_13017-t26_1
CNAG_01902	CNAG_01902-t26_1	x	CNAG_13018	CNAG_13018-t26_1
CNAG_01903	CNAG_01903-t26_1	s	CNAG_13019	CNAG_13019-t26_1
CNAG_01907	CNAG_01907-t26_1	x	CNAG_13020	CNAG_13020-t26_1
CNAG_01944	CNAG_01944-t26_1	x	CNAG_13033	CNAG_13033-t26_1
CNAG_01970	CNAG_01970-t26_1	x	CNAG_13037	CNAG_13037-t26_1
CNAG_01473	CNAG_01473-t26_1	x	CNAG_12952	CNAG_12952-t26_1
-	-	u	CNAG_12954	CNAG_12954-t26_1
CNAG_01489	CNAG_01489-t26_1	x	CNAG_12956	CNAG_12956-t26_1
CNAG_01511	CNAG_01511-t26_1	x	CNAG_12964	CNAG_12964-t26_1
CNAG_01525	CNAG_01525-t26_1	x	CNAG_12967	CNAG_12967-t26_1
CNAG_01588	CNAG_01588-t26_1	x	CNAG_12974	CNAG_12974-t26_1
CNAG_01633	CNAG_01633-t26_1	x	CNAG_12979	CNAG_12979-t26_1
CNAG_01682	CNAG_01682-t26_1	p	CNAG_12986	CNAG_12986-t26_1
-	-	u	CNAG_12992	CNAG_12992-t26_1
CNAG_01780	CNAG_01780-t26_1	x	CNAG_13004	CNAG_13004-t26_1
CNAG_01839	CNAG_01839-t26_1	x	CNAG_13010	CNAG_13010-t26_1
CNAG_01863	CNAG_01863-t26_1	x	CNAG_13013	CNAG_13013-t26_1
CNAG_01954	CNAG_01954-t26_1	x	CNAG_13035	CNAG_13035-t26_1
CNAG_06020	CNAG_06020-t26_1	x	CNAG_13050	CNAG_13050-t26_1
CNAG_06028	CNAG_06028-t26_1	x	CNAG_13052	CNAG_13052-t26_1
CNAG_07897	CNAG_07897-t26_1	p	CNAG_13056	CNAG_13056-t26_1
-	-	u	CNAG_13066	CNAG_13066-t26_1
-	-	u	CNAG_13081	CNAG_13081-t26_1
CNAG_06221	CNAG_06221-t26_1	x	CNAG_13085	CNAG_13085-t26_1
CNAG_06232	CNAG_06232-t26_1	x	CNAG_13088	CNAG_13088-t26_1
CNAG_06234	CNAG_06234-t26_1	x	CNAG_13089	CNAG_13089-t26_1
-	-	u	CNAG_13046	CNAG_13046-t26_1
-	-	u	CNAG_13051	CNAG_13051-t26_1
CNAG_06087	CNAG_06087-t26_1	x	CNAG_13064	CNAG_13064-t26_1
-	-	u	CNAG_13071	CNAG_13071-t26_1
-	-	u	CNAG_13077	CNAG_13077-t26_1
CNAG_07916	CNAG_07916-t26_1	x	CNAG_13092	CNAG_13092-t26_1
CNAG_07897	CNAG_07897-t26_1	x	CNAG_13057	CNAG_13057-t26_1
-	-	u	CNAG_13063	CNAG_13063-t26_1
CNAG_06092	CNAG_06092-t26_1	x	CNAG_13065	CNAG_13065-t26_1
CNAG_06105	CNAG_06105-t26_1	x	CNAG_13072	CNAG_13072-t26_1
-	-	u	CNAG_13045	CNAG_13045-t26_1
CNAG_06020	CNAG_06020-t26_1	x	CNAG_13049	CNAG_13049-t26_1
CNAG_06105	CNAG_06105-t26_1	p	CNAG_13069	CNAG_13069-t26_1
-	-	u	CNAG_13070	CNAG_13070-t26_1
CNAG_06206	CNAG_06206-t26_1	x	CNAG_13083	CNAG_13083-t26_1
CNAG_07009	CNAG_07009-t26_1	x	CNAG_13093	CNAG_13093-t26_1
CNAG_06016	CNAG_06016-t26_1	x	CNAG_13047	CNAG_13047-t26_1
-	-	u	CNAG_13054	CNAG_13054-t26_1
CNAG_06181	CNAG_06181-t26_1	x	CNAG_13075	CNAG_13075-t26_1
CNAG_06050	CNAG_06050-t26_2	x	CNAG_13055	CNAG_13055-t26_1
-	-	u	CNAG_13059	CNAG_13059-t26_1
CNAG_06082	CNAG_06082-t26_1	x	CNAG_13062	CNAG_13062-t26_1
CNAG_06230	CNAG_06230-t26_1	x	CNAG_13087	CNAG_13087-t26_1
-	-	u	CNAG_13094	CNAG_13094-t26_1
CNAG_06018	CNAG_06018-t26_1	x	CNAG_13048	CNAG_13048-t26_1
-	-	u	CNAG_13053	CNAG_13053-t26_1
-	-	u	CNAG_13061	CNAG_13061-t26_1
CNAG_06102	CNAG_06102-t26_4	x	CNAG_13067	CNAG_13067-t26_1
CNAG_06104	CNAG_06104-t26_1	x	CNAG_13068	CNAG_13068-t26_1
CNAG_06172	CNAG_06172-t26_1	x	CNAG_13074	CNAG_13074-t26_1
CNAG_06197	CNAG_06197-t26_1	p	CNAG_13078	CNAG_13078-t26_1
CNAG_06243	CNAG_06243-t26_1	x	CNAG_13091	CNAG_13091-t26_1
CNAG_07898	CNAG_07898-t26_1	x	CNAG_13058	CNAG_13058-t26_1
CNAG_06073	CNAG_06073-t26_1	x	CNAG_13060	CNAG_13060-t26_1
CNAG_06164	CNAG_06164-t26_1	x	CNAG_13073	CNAG_13073-t26_1
CNAG_07911	CNAG_07911-t26_1	x	CNAG_13076	CNAG_13076-t26_1
-	-	u	CNAG_13080	CNAG_13080-t26_1
CNAG_06204	CNAG_06204-t26_1	x	CNAG_13082	CNAG_13082-t26_1
-	-	u	CNAG_13084	CNAG_13084-t26_1
CNAG_06227	CNAG_06227-t26_1	x	CNAG_13086	CNAG_13086-t26_1
CNAG_06235	CNAG_06235-t26_1	x	CNAG_13090	CNAG_13090-t26_1
CNAG_07921	CNAG_07921-t26_1	x	CNAG_13097	CNAG_13097-t26_1
-	-	u	CNAG_13100	CNAG_13100-t26_1
CNAG_06274	CNAG_06274-t26_1	x	CNAG_13101	CNAG_13101-t26_1
-	-	u	CNAG_13103	CNAG_13103-t26_1
CNAG_07931	CNAG_07931-t26_1	x	CNAG_13110	CNAG_13110-t26_1
CNAG_06326	CNAG_06326-t26_1	x	CNAG_13115	CNAG_13115-t26_1
CNAG_06347	CNAG_06347-t26_1	s	CNAG_13121	CNAG_13121-t26_1
CNAG_06381	CNAG_06381-t26_1	x	CNAG_13122	CNAG_13122-t26_1
CNAG_06394	CNAG_06394-t26_1	x	CNAG_13125	CNAG_13125-t26_1
-	-	u	CNAG_13132	CNAG_13132-t26_1
-	-	u	CNAG_13095	CNAG_13095-t26_1
-	-	u	CNAG_13104	CNAG_13104-t26_1
CNAG_06278	CNAG_06278-t26_1	x	CNAG_13105	CNAG_13105-t26_1
CNAG_06312	CNAG_06312-t26_2	x	CNAG_13111	CNAG_13111-t26_1
CNAG_06387	CNAG_06387-t26_1	p	CNAG_13123	CNAG_13123-t26_1
-	-	u	CNAG_13129	CNAG_13129-t26_1
CNAG_06504	CNAG_06504-t26_1	x	CNAG_13139	CNAG_13139-t26_1
CNAG_07923	CNAG_07923-t26_1	x	CNAG_13099	CNAG_13099-t26_1
CNAG_06322	CNAG_06322-t26_1	x	CNAG_13114	CNAG_13114-t26_1
CNAG_06339	CNAG_06339-t26_1	x	CNAG_13119	CNAG_13119-t26_1
-	-	u	CNAG_13126	CNAG_13126-t26_1
CNAG_06504	CNAG_06504-t26_1	x	CNAG_13140	CNAG_13140-t26_1
CNAG_06265	CNAG_06265-t26_1	x	CNAG_13098	CNAG_13098-t26_1
CNAG_06337	CNAG_06337-t26_1	x	CNAG_13117	CNAG_13117-t26_1
CNAG_06390	CNAG_06390-t26_1	x	CNAG_13124	CNAG_13124-t26_1
-	-	u	CNAG_13135	CNAG_13135-t26_1
-	-	u	CNAG_13137	CNAG_13137-t26_1
CNAG_06292	CNAG_06292-t26_3	x	CNAG_13107	CNAG_13107-t26_1
CNAG_06300	CNAG_06300-t26_1	x	CNAG_13108	CNAG_13108-t26_1
CNAG_06302	CNAG_06302-t26_2	x	CNAG_13109	CNAG_13109-t26_1
CNAG_06338	CNAG_06338-t26_1	x	CNAG_13118	CNAG_13118-t26_1
-	-	u	CNAG_13127	CNAG_13127-t26_1
-	-	u	CNAG_13130	CNAG_13130-t26_1
CNAG_06438	CNAG_06438-t26_1	x	CNAG_13131	CNAG_13131-t26_1
-	-	u	CNAG_13133	CNAG_13133-t26_1
CNAG_06313	CNAG_06313-t26_1	x	CNAG_13112	CNAG_13112-t26_1
CNAG_06322	CNAG_06322-t26_1	x	CNAG_13113	CNAG_13113-t26_1
CNAG_06337	CNAG_06337-t26_1	x	CNAG_13116	CNAG_13116-t26_1
-	-	u	CNAG_13120	CNAG_13120-t26_1
CNAG_06260	CNAG_06260-t26_1	p	CNAG_13096	CNAG_13096-t26_1
CNAG_06521	CNAG_06521-t26_1	p	CNAG_13142	CNAG_13142-t26_1
CNAG_06276	CNAG_06276-t26_1	x	CNAG_13102	CNAG_13102-t26_1
CNAG_06290	CNAG_06290-t26_1	x	CNAG_13106	CNAG_13106-t26_1
CNAG_06402	CNAG_06402-t26_1	x	CNAG_13128	CNAG_13128-t26_1
-	-	u	CNAG_13134	CNAG_13134-t26_1
-	-	u	CNAG_13136	CNAG_13136-t26_1
-	-	u	CNAG_13138	CNAG_13138-t26_1
-	-	u	CNAG_13141	CNAG_13141-t26_1
CNAG_05342	CNAG_05342-t26_1	x	CNAG_13143	CNAG_13143-t26_1
CNAG_05343	CNAG_05343-t26_1	x	CNAG_13144	CNAG_13144-t26_1
CNAG_05345	CNAG_05345-t26_1	x	CNAG_13145	CNAG_13145-t26_1
CNAG_08023	CNAG_08023-t26_1	x	CNAG_13166	CNAG_13166-t26_1
CNAG_05420	CNAG_05420-t26_1	x	CNAG_13167	CNAG_13167-t26_1
CNAG_05421	CNAG_05421-t26_1	x	CNAG_13169	CNAG_13169-t26_1
-	-	u	CNAG_13190	CNAG_13190-t26_1
CNAG_07885	CNAG_07885-t26_1	x	CNAG_13191	CNAG_13191-t26_1
CNAG_05549	CNAG_05549-t26_1	x	CNAG_13192	CNAG_13192-t26_1
CNAG_05584	CNAG_05584-t26_1	x	CNAG_13195	CNAG_13195-t26_1
CNAG_05660	CNAG_05660-t26_1	x	CNAG_13201	CNAG_13201-t26_1
-	-	u	CNAG_13206	CNAG_13206-t26_1
CNAG_05357	CNAG_05357-t26_1	x	CNAG_13147	CNAG_13147-t26_1
-	-	u	CNAG_13150	CNAG_13150-t26_1
CNAG_05371	CNAG_05371-t26_1	x	CNAG_13152	CNAG_13152-t26_1
CNAG_05387	CNAG_05387-t26_1	x	CNAG_13158	CNAG_13158-t26_1
CNAG_05403	CNAG_05403-t26_2	x	CNAG_13163	CNAG_13163-t26_1
CNAG_05466	CNAG_05466-t26_1	x	CNAG_13179	CNAG_13179-t26_1
CNAG_05501	CNAG_05501-t26_2	x	CNAG_13187	CNAG_13187-t26_1
CNAG_05558	CNAG_05558-t26_1	x	CNAG_13193	CNAG_13193-t26_1
-	-	u	CNAG_13146	CNAG_13146-t26_1
CNAG_05399	CNAG_05399-t26_2	x	CNAG_13161	CNAG_13161-t26_1
-	-	u	CNAG_13168	CNAG_13168-t26_1
-	-	u	CNAG_13178	CNAG_13178-t26_1
CNAG_05668	CNAG_05668-t26_1	x	CNAG_13207	CNAG_13207-t26_1
CNAG_05369	CNAG_05369-t26_1	x	CNAG_13151	CNAG_13151-t26_1
CNAG_05386	CNAG_05386-t26_1	x	CNAG_13157	CNAG_13157-t26_1
-	-	u	CNAG_13173	CNAG_13173-t26_1
CNAG_05373	CNAG_05373-t26_1	s	CNAG_13153	CNAG_13153-t26_1
CNAG_05403	CNAG_05403-t26_1	x	CNAG_13162	CNAG_13162-t26_1
-	-	u	CNAG_13170	CNAG_13170-t26_1
CNAG_08024	CNAG_08024-t26_2	p	CNAG_13172	CNAG_13172-t26_1
-	-	u	CNAG_13174	CNAG_13174-t26_1
CNAG_05439	CNAG_05439-t26_1	x	CNAG_13175	CNAG_13175-t26_1
CNAG_05440	CNAG_05440-t26_1	p	CNAG_13176	CNAG_13176-t26_1
CNAG_05440	CNAG_05440-t26_1	x	CNAG_13177	CNAG_13177-t26_1
CNAG_07881	CNAG_07881-t26_1	x	CNAG_13184	CNAG_13184-t26_1
-	-	u	CNAG_13186	CNAG_13186-t26_1
CNAG_05631	CNAG_05631-t26_1	x	CNAG_13196	CNAG_13196-t26_1
-	-	u	CNAG_13199	CNAG_13199-t26_1
CNAG_05661	CNAG_05661-t26_1	x	CNAG_13203	CNAG_13203-t26_1
CNAG_05359	CNAG_05359-t26_1	p	CNAG_13148	CNAG_13148-t26_1
CNAG_05360	CNAG_05360-t26_1	x	CNAG_13149	CNAG_13149-t26_1
-	-	u	CNAG_13154	CNAG_13154-t26_1
CNAG_05392	CNAG_05392-t26_1	x	CNAG_13160	CNAG_13160-t26_1
CNAG_05632	CNAG_05632-t26_1	x	CNAG_13197	CNAG_13197-t26_1
CNAG_05636	CNAG_05636-t26_1	x	CNAG_13198	CNAG_13198-t26_1
CNAG_07874	CNAG_07874-t26_1	x	CNAG_13155	CNAG_13155-t26_1
CNAG_05391	CNAG_05391-t26_1	x	CNAG_13159	CNAG_13159-t26_1
CNAG_05409	CNAG_05409-t26_1	x	CNAG_13164	CNAG_13164-t26_1
CNAG_07878	CNAG_07878-t26_1	x	CNAG_13180	CNAG_13180-t26_1
CNAG_07879	CNAG_07879-t26_1	x	CNAG_13181	CNAG_13181-t26_1
CNAG_05478	CNAG_05478-t26_1	x	CNAG_13182	CNAG_13182-t26_1
CNAG_05485	CNAG_05485-t26_1	x	CNAG_13185	CNAG_13185-t26_1
CNAG_05523	CNAG_05523-t26_1	x	CNAG_13189	CNAG_13189-t26_1
CNAG_05666	CNAG_05666-t26_1	x	CNAG_13205	CNAG_13205-t26_1
CNAG_05383	CNAG_05383-t26_1	x	CNAG_13156	CNAG_13156-t26_1
CNAG_05416	CNAG_05416-t26_1	x	CNAG_13165	CNAG_13165-t26_1
-	-	u	CNAG_13171	CNAG_13171-t26_1
-	-	u	CNAG_13183	CNAG_13183-t26_1
CNAG_05523	CNAG_05523-t26_1	x	CNAG_13188	CNAG_13188-t26_1
CNAG_05565	CNAG_05565-t26_1	x	CNAG_13194	CNAG_13194-t26_1
CNAG_05642	CNAG_05642-t26_1	x	CNAG_13200	CNAG_13200-t26_1
CNAG_05660	CNAG_05660-t26_1	x	CNAG_13202	CNAG_13202-t26_1
CNAG_05664	CNAG_05664-t26_1	x	CNAG_13204	CNAG_13204-t26_1

## Sheet: RPF_RNA_TE_R1
gene_id	rpf	rna	te	replicate	Product.Description	Gene.Type
CNAG_00003	23	63	0.365079	R1	drug transporter	protein coding
CNAG_00004	517	250	2.068	R1	hypothetical protein	protein coding
CNAG_00005	519	67	7.74627	R1	TPR repeat-containing protein	protein coding
CNAG_00006	844	460	1.83478	R1	prohibitin-2	protein coding
CNAG_00008	1082	340	3.18235	R1	hypothetical protein	protein coding
CNAG_00010	396	622	0.636656	R1	cation transporter	protein coding
CNAG_00013	45	135	0.333333	R1	hypothetical protein, hypothetical protein, variant 1, hypothetical protein, variant 2	protein coding
CNAG_00017	20	74	0.27027	R1	hypothetical protein	protein coding
CNAG_00019	313	341	0.917889	R1	mitochondrial import inner membrane translocase subunit tim9	protein coding
CNAG_00021	1104	527	2.09488	R1	S-adenosylmethionine decarboxylase proenzyme	protein coding
CNAG_00022	663	626	1.05911	R1	cytochrome c heme-lyase	protein coding
CNAG_00023	22	20	1.1	R1	hypothetical protein	protein coding
CNAG_00025	516	288	1.79167	R1	vacuolar calcium exchanger	protein coding
CNAG_00026	1343	942	1.42569	R1	kynurenine aminotransferase, kynurenine aminotransferase, variant	protein coding
CNAG_00028	89	100	0.89	R1	high-affinity nicotinic acid transporter, high-affinity nicotinic acid transporter, variant	protein coding
CNAG_00031	411	202	2.03465	R1	hypothetical protein, hypothetical protein, variant	protein coding
CNAG_00036	88	23	3.82609	R1	SEC14 cytosolic factor	protein coding
CNAG_00038	535	237	2.25738	R1	Alcohol dehydrogenase	protein coding
CNAG_00043	537	316	1.69937	R1	hypothetical protein, hypothetical protein, variant	protein coding
CNAG_00045	366	74	4.94595	R1	hypothetical protein	protein coding
CNAG_00047	85	59	1.44068	R1	pyruvate dehydrogenase kinase	protein coding
CNAG_00050	483	131	3.68702	R1	hypothetical protein	protein coding
CNAG_00051	1238	620	1.99677	R1	putative set3c deacetylase complex subunit	protein coding
CNAG_00057	902	455	1.98242	R1	fructose-1,6-bisphosphatase I	protein coding
CNAG_00058	1472	839	1.75447	R1	T-complex protein 1 subunit epsilon	protein coding
CNAG_00060	764	276	2.76812	R1	chaperone regulator, chaperone regulator, variant	protein coding
CNAG_00062	1395	702	1.98718	R1	26S proteasome regulatory subunit N3	protein coding
CNAG_00064	537	449	1.19599	R1	COPII-coated vesicle protein	protein coding
CNAG_00066	898	555	1.61802	R1	membrane protein	protein coding
CNAG_00073	1415	766	1.84726	R1	nuclear mRNA splicing protein	protein coding
CNAG_00075	441	299	1.47492	R1	hypothetical protein	protein coding
CNAG_00081	1993	752	2.65027	R1	pre-mRNA-processing factor 6	protein coding
CNAG_00083	1348	396	3.40404	R1	hypothetical protein	protein coding
CNAG_00085	515	293	1.75768	R1	histone chaperone ASF1	protein coding
CNAG_00087	897	410	2.1878	R1	hypothetical protein	protein coding
CNAG_00088	763	738	1.03388	R1	prohibitin PHB1	protein coding
CNAG_00089	743	345	2.15362	R1	exosome complex component RRP4	protein coding
CNAG_00093	994	347	2.86455	R1	hypothetical protein	protein coding
CNAG_00095	933	502	1.85857	R1	hypothetical protein	protein coding
CNAG_00097	148	70	2.11429	R1	myo-inositol transporter, putative	protein coding
CNAG_00099	1581	423	3.73759	R1	minichromosome maintenance protein 3	protein coding
CNAG_00101	513	413	1.24213	R1	hypothetical protein	protein coding
CNAG_00105	18	49	0.367347	R1	pyridoxal reductase	protein coding
CNAG_00106	1463	1110	1.31802	R1	Two-component-like sensor kinase	protein coding
CNAG_00108	1210	646	1.87307	R1	RuvB-like helicase 1	protein coding
CNAG_00110	1083	347	3.12104	R1	hypothetical protein	protein coding
CNAG_00115	981	439	2.23462	R1	chlorophyll synthesis pathway protein BchC	protein coding
CNAG_00117	919	533	1.7242	R1	c-14 sterol reductase	protein coding
CNAG_00118	290	188	1.54255	R1	hypothetical protein	protein coding
CNAG_00120	419	274	1.5292	R1	hypothetical protein	protein coding
CNAG_00121	1037	751	1.38083	R1	glycerol-3-phosphate dehydrogenase (NAD())	protein coding
CNAG_00122	722	241	2.99585	R1	Alpha-amylase	protein coding
CNAG_00123	75	38	1.97368	R1	hypothetical protein	protein coding
CNAG_00126	643	280	2.29643	R1	2-deoxy-D-gluconate 3-dehydrogenase	protein coding
CNAG_00127	447	301	1.48505	R1	hypothetical protein	protein coding
CNAG_00132	20	19	1.05263	R1	hypothetical protein, hypothetical protein, variant	protein coding
CNAG_00134	653	315	2.07302	R1	hypothetical protein	protein coding
CNAG_00136	2792	942	2.96391	R1	ubiquitin-activating enzyme E1	protein coding
CNAG_00137	628	435	1.44368	R1	hypothetical protein	protein coding
CNAG_00139	766	504	1.51984	R1	hypothetical protein	protein coding
CNAG_00140	1137	780	1.45769	R1	U1 small nuclear ribonucleoprotein 70kDa	protein coding
CNAG_00144	170	58	2.93103	R1	hypothetical protein, hypothetical protein, variant	protein coding
CNAG_00146	810	251	3.22709	R1	5'/3'-nucleotidase SurE	protein coding
CNAG_00152	621	231	2.68831	R1	hypothetical protein	protein coding
CNAG_00154	799	360	2.21944	R1	oxidoreductase	protein coding
CNAG_00156	1529	456	3.35307	R1	Putative zinc finger transcription factor	protein coding
CNAG_00158	328	243	1.34979	R1	glycosyltransferase	protein coding
CNAG_00161	214	88	2.43182	R1	auxin-induced protein	protein coding
CNAG_00162	471	219	2.15068	R1	alternative oxidase, mitochondrial	protein coding
CNAG_00163	485	223	2.17489	R1	general transcription factor 3C polypeptide 4, general transcription factor 3C polypeptide 4, variant	protein coding
CNAG_00165	922	633	1.45656	R1	methylthioadenosine phosphorylase	protein coding
CNAG_00166	1057	319	3.31348	R1	ATP-dependent RNA helicase DBP8	protein coding
CNAG_00174	574	178	3.22472	R1	hypothetical protein	protein coding
CNAG_00176	1401	834	1.67986	R1	glutamate carboxypeptidase, glutamate carboxypeptidase, variant	protein coding
CNAG_00178	183	264	0.693182	R1	DNA repair protein REV1	protein coding
CNAG_00181	502	173	2.90173	R1	macrophage erythroblast attacher isoform 1	protein coding
CNAG_00183	673	410	1.64146	R1	alternative cyclin Pcl12, alternative cyclin Pcl12, variant	protein coding
CNAG_00186	160	86	1.86047	R1	mitotic spindle organizing protein 1	protein coding
CNAG_00188	414	209	1.98086	R1	endoplasmic reticulum protein	protein coding
CNAG_00193	2383	935	2.54866	R1	GATA type zinc finger protein asd-4	protein coding
CNAG_00195	499	393	1.26972	R1	exosome complex protein LRP1	protein coding
CNAG_00232	426	572	0.744755	R1	large subunit ribosomal protein L30e	protein coding
CNAG_00235	1003	798	1.25689	R1	amt family ammonium transporter	protein coding
CNAG_00239	970	200	4.85	R1	hypothetical protein	protein coding
CNAG_00243	400	175	2.28571	R1	hypothetical protein	protein coding
CNAG_00246	1104	337	3.27596	R1	hypothetical protein	protein coding
CNAG_00248	290	197	1.47208	R1	ESCRT-II complex subunit VPS36	protein coding
CNAG_00252	265	137	1.93431	R1	transcription elongation factor B, polypeptide 1, transcription elongation factor B, polypeptide 1, variant	protein coding
CNAG_00255	280	271	1.03321	R1	hypothetical protein	protein coding
CNAG_00257	625	565	1.10619	R1	kinesin family member 21A, kinesin family member 21A, variant	protein coding
CNAG_00258	620	262	2.36641	R1	Fungal gamma tubulin complex family protein	protein coding
CNAG_00260	802	499	1.60721	R1	transformer-2 protein	protein coding
CNAG_00262	25	18	1.38889	R1	hypothetical protein, hypothetical protein, variant	protein coding
CNAG_00263	303	177	1.71186	R1	serine/threonine/tyrosine-interacting protein	protein coding
CNAG_00264	757	433	1.74827	R1	nuclease I, nuclease I, variant	protein coding
CNAG_00266	494	208	2.375	R1	hypothetical protein	protein coding
CNAG_00268	1811	1197	1.51295	R1	acetolactate synthase, mitochondrial	protein coding
CNAG_00271	570	254	2.24409	R1	INO80 complex subunit C	protein coding
CNAG_00273	233	83	2.80723	R1	hypothetical protein	protein coding
CNAG_00275	816	456	1.78947	R1	hypothetical protein	protein coding
CNAG_00278	575	274	2.09854	R1	methionine aminopeptidase, type I	protein coding
CNAG_00283	46	59	0.779661	R1	hypothetical protein	protein coding
CNAG_00285	375	186	2.01613	R1	hypothetical protein	protein coding
CNAG_00286	1401	848	1.65212	R1	putative nuclear polyadenylated mRNA-binding protein	protein coding
CNAG_00289	465	184	2.52717	R1	hypothetical protein	protein coding
CNAG_00293	630	525	1.2	R1	Ras-like protein	protein coding
CNAG_00300	997	372	2.68011	R1	gamma-tubulin complex component 2	protein coding
CNAG_00304	363	213	1.70423	R1	hypothetical protein	protein coding
CNAG_00307	235	284	0.827465	R1	hypothetical protein	protein coding
CNAG_00308	592	200	2.96	R1	gly-X carboxypeptidase	protein coding
CNAG_00311	1198	692	1.73121	R1	3-hydroxyisobutyryl-CoA hydrolase	protein coding
CNAG_00314	242	162	1.49383	R1	hypothetical protein	protein coding
CNAG_00316	542	511	1.06067	R1	rdgB/HAM1 family non-canonical purine NTP pyrophosphatase	protein coding
CNAG_00317	836	199	4.20101	R1	hypothetical protein	protein coding
CNAG_00319	691	462	1.49567	R1	hypothetical protein, hypothetical protein, variant	protein coding
CNAG_00322	594	240	2.475	R1	hypothetical protein	protein coding
CNAG_00327	285	117	2.4359	R1	DASH complex subunit DAD2	protein coding
CNAG_00329	480	406	1.18227	R1	NADH dehydrogenase (ubiquinone) 1 beta subcomplex 8	protein coding
CNAG_00332	247	58	4.25862	R1	hypothetical protein	protein coding
CNAG_00335	840	437	1.9222	R1	hypothetical protein	protein coding
CNAG_00336	81	306	0.264706	R1	hypothetical protein	protein coding
CNAG_00342	1122	191	5.87435	R1	hypothetical protein	protein coding
CNAG_00343	544	189	2.87831	R1	hypothetical protein	protein coding
CNAG_00345	913	452	2.01991	R1	porphobilinogen synthase	protein coding
CNAG_00347	1314	276	4.76087	R1	DEAH box polypeptide 36	protein coding
CNAG_00353	255	65	3.92308	R1	3-oxo-5-alpha-steroid 4-dehydrogenase 1	protein coding
CNAG_00354	1035	1036	0.999035	R1	vacuolar protein 8	protein coding
CNAG_00358	590	386	1.5285	R1	tRNA dimethylallyltransferase, tRNA dimethylallyltransferase, variant	protein coding
CNAG_00359	352	228	1.54386	R1	hypothetical protein	protein coding
CNAG_00360	613	259	2.3668	R1	nuclear protein SNF4, nuclear protein SNF4, variant	protein coding
CNAG_00361	1112	750	1.48267	R1	hypothetical protein	protein coding
CNAG_00362	731	285	2.56491	R1	hypothetical protein	protein coding
CNAG_00364	729	370	1.97027	R1	tRNA threonylcarbamoyladenosine biosynthesis protein	protein coding
CNAG_00367	283	211	1.34123	R1	dynactin 5	protein coding
CNAG_00369	517	259	1.99614	R1	hypothetical protein	protein coding
CNAG_00370	509	553	0.920434	R1	Predicted ubiquitin-ribosomal 60s subunit protein L40a fusion protein	protein coding
CNAG_00372	1353	627	2.15789	R1	chromatin structure-remodeling complex protein RSC7	protein coding
CNAG_00375	1270	473	2.68499	R1	histone acetyltransferase	protein coding
CNAG_00377	2527	891	2.83614	R1	DNA topoisomerase II, DNA topoisomerase II, variant	protein coding
CNAG_00384	338	116	2.91379	R1	RAD51-like protein 2	protein coding
CNAG_00388	1196	242	4.94215	R1	1-phosphatidylinositol-4-phosphate 5-kinase	protein coding
CNAG_00391	476	212	2.24528	R1	hypothetical protein	protein coding
CNAG_00393	968	240	4.03333	R1	1,4-alpha-glucan-branching enzyme	protein coding
CNAG_00395	232	153	1.51634	R1	structure-specific endonuclease subunit SLX1	protein coding
CNAG_00396	912	240	3.8	R1	AGC/PKA protein kinase	protein coding
CNAG_00398	646	237	2.72574	R1	hypothetical protein	protein coding
CNAG_00399	649	341	1.90323	R1	transformer-2-beta isoform 3	protein coding
CNAG_00401	539	280	1.925	R1	phosphatidylinositol glycan, class U	protein coding
CNAG_00402	3455	1070	3.22897	R1	translation initiation factor 4G	protein coding
CNAG_00404	419	45	9.31111	R1	RING zinc finger protein	protein coding
CNAG_00406	1348	273	4.93773	R1	hypothetical protein	protein coding
CNAG_00407	1279	783	1.63346	R1	glyoxal oxidase	protein coding
CNAG_00408	674	209	3.22488	R1	serine/threonine-protein phosphatase PP-X isozyme 1	protein coding
CNAG_00410	1612	617	2.61264	R1	hypothetical protein	protein coding
CNAG_00412	15	13	1.15385	R1	hypothetical protein	protein coding
CNAG_00413	1449	758	1.91161	R1	putative oxidoreductase	protein coding
CNAG_00416	246	177	1.38983	R1	f-box/wd-repeat protein lin-23	protein coding
CNAG_00417	1329	1345	0.988104	R1	elongation factor 1-gamma	protein coding
CNAG_00418	1254	1169	1.07271	R1	S-adenosylmethionine synthase	protein coding
CNAG_00419	32	27	1.18519	R1	DNA polymerase beta subunit	protein coding
CNAG_00421	504	226	2.23009	R1	charged multivesicular body protein 3	protein coding
CNAG_00423	379	166	2.28313	R1	kinetochore protein Spc24, fungi type	protein coding
CNAG_00426	1208	261	4.62835	R1	UBA/TS-N domain-containing protein	protein coding
CNAG_00427	579	503	1.15109	R1	type 2C protein Phosphatase	protein coding
CNAG_00429	1032	305	3.38361	R1	tRNA-dihydrouridine synthase 1	protein coding
CNAG_00433	65	77	0.844156	R1	hypothetical protein	protein coding
CNAG_00434	828	520	1.59231	R1	arginine N-methyltransferase 2	protein coding
CNAG_00436	670	425	1.57647	R1	palmitoyltransferase akr1	protein coding
CNAG_00437	240	113	2.12389	R1	anaphase-promoting complex subunit 11	protein coding
CNAG_00439	1503	462	3.25325	R1	hypothetical protein	protein coding
CNAG_00441	1608	1374	1.17031	R1	inosine-5'-monophosphate dehydrogenase	protein coding
CNAG_00447	1472	1278	1.1518	R1	T-complex protein 1 subunit beta	protein coding
CNAG_00449	1100	330	3.33333	R1	RNA-binding protein NOB1, RNA-binding protein NOB1, variant	protein coding
CNAG_00455	1282	449	2.85523	R1	ubiquitin carboxyl-terminal hydrolase Ubp16	protein coding
CNAG_00460	804	125	6.432	R1	virulence related protein of unknown function	protein coding
CNAG_00461	1046	704	1.4858	R1	protein kinase C substrate 80K-H	protein coding
CNAG_00465	287	255	1.12549	R1	hypothetical protein	protein coding
CNAG_00467	287	112	2.5625	R1	hypothetical protein, hypothetical protein, variant	protein coding
CNAG_00469	347	224	1.54911	R1	endoplasmic reticulum protein	protein coding
CNAG_00471	494	377	1.31034	R1	mitochondrial protein	protein coding
CNAG_00473	349	218	1.60092	R1	oligosaccharyltransferase complex subunit epsilon	protein coding
CNAG_00475	472	121	3.90083	R1	WSC domain-containing protein	protein coding
CNAG_00482	975	683	1.42753	R1	26S proteasome regulatory subunit N10	protein coding
CNAG_00484	95	102	0.931373	R1	2-oxoisovalerate dehydrogenase E2 component (dihydrolipoyl transacylase)	protein coding
CNAG_00485	252	58	4.34483	R1	hypothetical protein	protein coding
CNAG_00488	56	71	0.788732	R1	hypothetical protein, hypothetical protein, variant	protein coding
CNAG_00490	636	187	3.40107	R1	acetyl-CoA acyltransferase	protein coding
CNAG_00493	145	230	0.630435	R1	hypothetical protein	protein coding
CNAG_00497	990	285	3.47368	R1	hypothetical protein	protein coding
CNAG_00499	619	189	3.27513	R1	solute carrier family 25 (mitochondrial carnitine/acylcarnitine transporter), member 20/29	protein coding
CNAG_00501	66	48	1.375	R1	hypothetical protein	protein coding
CNAG_00503	798	459	1.73856	R1	hypothetical protein	protein coding
CNAG_00506	592	157	3.7707	R1	hypothetical protein	protein coding
CNAG_00508	1257	213	5.90141	R1	vacuolar protein sorting-associated protein vps17	protein coding
CNAG_00509	1267	960	1.31979	R1	translation initiation factor 3 subunit M	protein coding
CNAG_00512	1075	685	1.56934	R1	mitochondrial carrier protein	protein coding
CNAG_00514	742	316	2.3481	R1	hypothetical protein	protein coding
CNAG_00517	496	483	1.02692	R1	hypothetical protein	protein coding
CNAG_00521	172	172	1	R1	hypothetical protein	protein coding
CNAG_00523	582	219	2.65753	R1	hypothetical protein, hypothetical protein, variant	protein coding
CNAG_00526	15	13	1.15385	R1	hypothetical protein	protein coding
CNAG_00527	1617	789	2.04943	R1	translation initiation factor eIF-2B subunit epsilon	protein coding
CNAG_00531	1036	441	2.34921	R1	potassium/sodium efflux P-type ATPase, fungal- type	protein coding
CNAG_00532	571	243	2.34979	R1	hypothetical protein	protein coding
CNAG_00534	312	404	0.772277	R1	hypothetical protein	protein coding
CNAG_00536	303	390	0.776923	R1	hypothetical protein, hypothetical protein, variant	protein coding
CNAG_00538	327	383	0.853786	R1	hypothetical protein	protein coding
CNAG_00539	733	198	3.70202	R1	membrane transporter	protein coding
CNAG_00541	65	91	0.714286	R1	dimethylaniline monooxygenase	protein coding
CNAG_00544	164	241	0.680498	R1	hypothetical protein	protein coding
CNAG_00547	932	717	1.29986	R1	hypothetical protein	protein coding
CNAG_00549	10	67	0.149254	R1	hypothetical protein, hypothetical protein, variant	protein coding
CNAG_00550	15	29	0.517241	R1	DNA mismatch repair protein Msh5	protein coding
CNAG_00551	1647	760	2.16711	R1	poly(A) polymerase	protein coding
CNAG_00554	762	206	3.69903	R1	inositol phosphorylsphingolipid-phospholipase C	protein coding
CNAG_00555	463	202	2.29208	R1	hypothetical protein, hypothetical protein, variant	protein coding
CNAG_00556	1240	645	1.92248	R1	Casein kinase I	protein coding
CNAG_00560	649	496	1.30847	R1	V-type H -transporting ATPase subunit E	protein coding
CNAG_00562	786	455	1.72747	R1	hypothetical protein	protein coding
CNAG_00563	392	214	1.83178	R1	hypothetical protein	protein coding
CNAG_00565	1904	1328	1.43373	R1	dynamin GTPase	protein coding
CNAG_00567	678	365	1.85753	R1	WD40 repeat protein	protein coding
CNAG_00568	28	26	1.07692	R1	hypothetical protein	protein coding
CNAG_00570	1149	579	1.98446	R1	cAMP-dependent protein kinase regulator	protein coding
CNAG_00573	461	365	1.26301	R1	NADH dehydrogenase (ubiquinone) 1 alpha subcomplex 6	protein coding
CNAG_00574	380	382	0.994764	R1	amino acid/metabolite permease, amino acid/metabolite permease, variant	protein coding
CNAG_00575	755	185	4.08108	R1	Catalase 3	protein coding
CNAG_00576	729	411	1.77372	R1	mitochondrial protein	protein coding
CNAG_00577	449	308	1.45779	R1	hypothetical protein	protein coding
CNAG_00580	1095	1100	0.995455	R1	translation initiation factor IF-2	protein coding
CNAG_00582	402	404	0.99505	R1	vacuolar transporter chaperone 1	protein coding
CNAG_00585	698	528	1.32197	R1	hypothetical protein	protein coding
CNAG_00589	579	392	1.47704	R1	5-formyltetrahydrofolate cyclo-ligase	protein coding
CNAG_00592	392	81	4.83951	R1	dolichol-phosphate mannosyltransferase	protein coding
CNAG_00594	819	280	2.925	R1	lipid particle protein	protein coding
CNAG_00595	130	158	0.822785	R1	hypothetical protein	protein coding
CNAG_00600	1150	624	1.84295	R1	capsular associated protein	protein coding
CNAG_00601	138	53	2.60377	R1	glycosyl hydrolase	protein coding
CNAG_00602	1026	886	1.15801	R1	translation initiation factor 3 subunit I	protein coding
CNAG_00603	781	431	1.81206	R1	pre-rRNA-processing protein PNO1	protein coding
CNAG_00607	1051	551	1.90744	R1	hypothetical protein	protein coding
CNAG_00609	404	348	1.16092	R1	hypothetical protein	protein coding
CNAG_00613	420	278	1.51079	R1	Cytosine deaminase	protein coding
CNAG_00615	215	67	3.20896	R1	hypothetical protein	protein coding
CNAG_00619	570	130	4.38462	R1	tubulin folding cofactor C	protein coding
CNAG_00623	730	311	2.34727	R1	fungus-specific glucosylceramide	protein coding
CNAG_00624	676	508	1.33071	R1	hypothetical protein	protein coding
CNAG_00625	464	504	0.920635	R1	ARF guanyl-nucleotide exchange factor	protein coding
CNAG_00628	219	133	1.64662	R1	hypothetical protein	protein coding
CNAG_00632	417	245	1.70204	R1	hypothetical protein	protein coding
CNAG_00634	1349	461	2.92625	R1	hypothetical protein, hypothetical protein, variant	protein coding
CNAG_00635	1842	480	3.8375	R1	cytoplasmic protein	protein coding
CNAG_00636	825	303	2.72277	R1	CDC7 protein kinase	protein coding
CNAG_00638	877	437	2.00686	R1	GTPase	protein coding
CNAG_00641	2534	926	2.7365	R1	transcription elongation factor spt5	protein coding
CNAG_00644	553	163	3.39264	R1	sphingolipid delta-4 desaturase	protein coding
CNAG_00648	491	220	2.23182	R1	esterase/lipase	protein coding
CNAG_00649	1963	983	1.99695	R1	tryptophan synthase, beta subunit	protein coding
CNAG_00651	55	19	2.89474	R1	ATP-binding cassette, subfamily D (ALD), peroxisomal long-chain fatty acid import protein	protein coding
CNAG_00652	448	217	2.06452	R1	hypothetical protein, hypothetical protein, variant 1, hypothetical protein, variant 2	protein coding
CNAG_00655	481	517	0.930368	R1	large subunit acidic ribosomal protein P1	protein coding
CNAG_00658	335	126	2.65873	R1	hypothetical protein	protein coding
CNAG_00660	510	164	3.10976	R1	histone deacetylase HOS3	protein coding
CNAG_00662	715	401	1.78304	R1	carboxymethylenebutenolidase	protein coding
CNAG_00666	2543	655	3.88244	R1	nucleoporin NSP1	protein coding
CNAG_00667	768	285	2.69474	R1	hypothetical protein	protein coding
CNAG_00668	992	515	1.92621	R1	hypothetical protein	protein coding
CNAG_00669	547	344	1.59012	R1	hypothetical protein	protein coding
CNAG_00671	1025	403	2.54342	R1	cytoplasmic protein	protein coding
CNAG_00674	392	161	2.43478	R1	hypothetical protein	protein coding
CNAG_00675	493	491	1.00407	R1	carnitine/acyl carnitine carrier, carnitine/acyl carnitine carrier, variant	protein coding
CNAG_00680	788	479	1.64509	R1	kinetochore protein Nuf2, variant, kinetochore protein nuf2	protein coding
CNAG_00684	631	437	1.44394	R1	Ribulose-phosphate 3-epimerase	protein coding
CNAG_00686	895	731	1.22435	R1	hypothetical protein	protein coding
CNAG_00688	327	210	1.55714	R1	hypothetical protein	protein coding
CNAG_00691	380	244	1.55738	R1	hypothetical protein	protein coding
CNAG_00695	361	172	2.09884	R1	hypothetical protein	protein coding
CNAG_00697	1113	681	1.63436	R1	UDP-glucose 4-epimerase	protein coding
CNAG_00699	255	48	5.3125	R1	transmembrane receptor	protein coding
CNAG_00701	1037	732	1.41667	R1	protein involved in gxm O-acetylation	protein coding
CNAG_00703	503	590	0.852542	R1	large subunit ribosomal protein L31e	protein coding
CNAG_00704	942	324	2.90741	R1	hypothetical protein, hypothetical protein, variant	protein coding
CNAG_00705	1171	859	1.36321	R1	RuvB-like helicase 2	protein coding
CNAG_00707	507	251	2.01992	R1	protein sym1	protein coding
CNAG_00709	790	306	2.5817	R1	uracil-DNA glycosylase	protein coding
CNAG_00712	672	269	2.49814	R1	hypothetical protein	protein coding
CNAG_00715	276	318	0.867925	R1	hypothetical protein	protein coding
CNAG_00718	1119	202	5.5396	R1	chromatin assembly factor 1 subunit B	protein coding
CNAG_00719	1069	475	2.25053	R1	ribosome biogenesis ATPase	protein coding
CNAG_00722	522	400	1.305	R1	large subunit ribosomal protein L27	protein coding
CNAG_00727	422	145	2.91034	R1	mitochondrial protein with role in iron accumulation	protein coding
CNAG_00728	71	70	1.01429	R1	dityrosine transporter	protein coding
CNAG_00732	483	140	3.45	R1	hypothetical protein, hypothetical protein, variant 1, hypothetical protein, variant 2	protein coding
CNAG_00735	850	190	4.47368	R1	aldehyde dehydrogenase family 7 member A1	protein coding
CNAG_00736	889	426	2.08685	R1	exocyst protein, exocyst protein, variant	protein coding
CNAG_00737	597	251	2.37849	R1	hypothetical protein	protein coding
CNAG_00738	20	21	0.952381	R1	hypothetical protein	protein coding
CNAG_00740	1998	585	3.41538	R1	swi/snf chromatin-remodeling complex subunit	protein coding
CNAG_00743	1625	616	2.63799	R1	imidazoleglycerol phosphate synthase, cyclase subunit	protein coding
CNAG_00744	519	257	2.01946	R1	alpha 1,6-mannosyltransferase	protein coding
CNAG_00748	394	166	2.37349	R1	hypothetical protein	protein coding
CNAG_00753	708	441	1.60544	R1	hypothetical protein	protein coding
CNAG_00754	1745	1033	1.68925	R1	ATP-binding cassette, sub-family E, member 1	protein coding
CNAG_00756	282	218	1.29358	R1	hypothetical protein	protein coding
CNAG_00759	15	17	0.882353	R1	hypothetical protein, hypothetical protein, variant	protein coding
CNAG_00761	431	357	1.20728	R1	coiled-coil domain-containing protein 12	protein coding
CNAG_00765	480	188	2.55319	R1	hypothetical protein	protein coding
CNAG_00766	279	51	5.47059	R1	hypothetical protein	protein coding
CNAG_00768	574	297	1.93266	R1	hypothetical protein	protein coding
CNAG_00770	1291	364	3.5467	R1	DNA mismatch repair protein Msh2	protein coding
CNAG_00771	474	535	0.885981	R1	large subunit ribosomal protein L29	protein coding
CNAG_00774	1440	672	2.14286	R1	phosphoglycerate dehydrogenase	protein coding
CNAG_00778	326	262	1.24427	R1	hypothetical protein	protein coding
CNAG_00780	859	105	8.18095	R1	hypothetical protein, hypothetical protein, variant	protein coding
CNAG_00782	157	113	1.38938	R1	STE/STE20/Fray protein kinase	protein coding
CNAG_00783	562	348	1.61494	R1	hypothetical protein	protein coding
CNAG_00784	209	163	1.28221	R1	hypothetical protein	protein coding
CNAG_00786	315	204	1.54412	R1	hypothetical protein	protein coding
CNAG_00788	1503	1437	1.04593	R1	NADH dehydrogenase	protein coding
CNAG_00789	142	303	0.468647	R1	hypothetical protein	protein coding
CNAG_00791	311	115	2.70435	R1	hypothetical protein	protein coding
CNAG_00792	1236	522	2.36782	R1	ATP-binding cassette transporter	protein coding
CNAG_00794	633	380	1.66579	R1	hypothetical protein	protein coding
CNAG_00796	1451	392	3.70153	R1	ATP-binding cassette, subfamily B (MDR/TAP), member 1	protein coding
CNAG_00797	1836	1016	1.80709	R1	acetyl-CoA synthetase	protein coding
CNAG_00798	19	13	1.46154	R1	hypothetical protein	protein coding
CNAG_00800	189	24	7.875	R1	nicotinamidase	protein coding
CNAG_00801	30	35	0.857143	R1	hypothetical protein	protein coding
CNAG_00803	288	270	1.06667	R1	solute carrier family 24 (sodium/potassium/calcium exchanger), member 6	protein coding
CNAG_00805	702	247	2.84211	R1	hypothetical protein	protein coding
CNAG_00808	421	469	0.897655	R1	myosin regulatory light chain cdc4	protein coding
CNAG_00810	763	184	4.14674	R1	polynucleotide kinase 3'-phosphatase	protein coding
CNAG_00811	953	590	1.61525	R1	anthranilate phosphoribosyltransferase	protein coding
CNAG_00812	1448	538	2.69145	R1	cohesin complex subunit SA-1/2	protein coding
CNAG_00814	132	217	0.608295	R1	hypothetical protein	protein coding
CNAG_00816	439	530	0.828302	R1	microtubule binding protein	protein coding
CNAG_00818	587	196	2.9949	R1	hypothetical protein	protein coding
CNAG_00819	313	532	0.588346	R1	small subunit ribosomal protein S30	protein coding
CNAG_00821	425	515	0.825243	R1	large subunit ribosomal protein L34e	protein coding
CNAG_00823	23	78	0.294872	R1	cadmium ion transporter	protein coding
CNAG_00828	162	31	5.22581	R1	pathway-specific nitrogen regulator	protein coding
CNAG_00829	517	484	1.06818	R1	E3 ubiquitin ligase complex SCF subunit sconC	protein coding
CNAG_00832	310	88	3.52273	R1	D-lactate dehydrogenase	protein coding
CNAG_00836	491	212	2.31604	R1	2-hydroxyacid dehydrogenase	protein coding
CNAG_00838	152	62	2.45161	R1	hypothetical protein	protein coding
CNAG_00839	249	83	3	R1	mitochondrial protein	protein coding
CNAG_00841	498	177	2.81356	R1	hypothetical protein	protein coding
CNAG_00846	693	278	2.49281	R1	hypothetical protein	protein coding
CNAG_00848	1969	621	3.17069	R1	hypothetical protein, hypothetical protein, variant 1, hypothetical protein, variant 2	protein coding
CNAG_00850	191	29	6.58621	R1	plant-inducible protein	protein coding
CNAG_00851	242	110	2.2	R1	hypothetical protein	protein coding
CNAG_00854	583	510	1.14314	R1	C-8 sterol isomerase	protein coding
CNAG_00862	524	233	2.24893	R1	hypothetical protein	protein coding
CNAG_00864	12	12	1	R1	myo-inositol transporter, putative	protein coding
CNAG_00866	802	424	1.89151	R1	transketolase, transketolase, variant	protein coding
CNAG_00869	765	221	3.46154	R1	ATP-binding cassette transporter	protein coding
CNAG_00870	15	18	0.833333	R1	hypothetical protein, hypothetical protein, variant 1, hypothetical protein, variant 2	protein coding
CNAG_00872	486	628	0.773885	R1	ATP-dependent DNA helicase	protein coding
CNAG_00874	1757	770	2.28182	R1	multisite-specific tRNA:(cytosine-C5)- methyltransferase	protein coding
CNAG_00875	470	268	1.75373	R1	rab family protein	protein coding
CNAG_00876	192	119	1.61345	R1	ferric-chelate reductase	protein coding
CNAG_00878	22	121	0.181818	R1	hypothetical protein	protein coding
CNAG_00884	861	325	2.64923	R1	exocyst complex component protein	protein coding
CNAG_00886	1320	1275	1.03529	R1	Adenosylhomocysteinase	protein coding
CNAG_00887	13	13	1	R1	hypothetical protein	protein coding
CNAG_00890	717	319	2.24765	R1	hypothetical protein	protein coding
CNAG_00892	212	103	2.05825	R1	hypothetical protein	protein coding
CNAG_00894	289	347	0.832853	R1	hypothetical protein	protein coding
CNAG_00896	343	179	1.9162	R1	transcription factor	protein coding
CNAG_00897	1383	1087	1.27231	R1	putative glucosidase	protein coding
CNAG_00899	1265	284	4.45423	R1	hypothetical protein	protein coding
CNAG_00901	268	131	2.0458	R1	hypothetical protein	protein coding
CNAG_00907	40	27	1.48148	R1	hypothetical protein, hypothetical protein, variant	protein coding
CNAG_00908	72	78	0.923077	R1	hypothetical protein	protein coding
CNAG_00915	20	21	0.952381	R1	hypothetical protein, hypothetical protein, variant	protein coding
CNAG_00919	1165	707	1.64781	R1	carboxypeptidase D	protein coding
CNAG_00920	436	199	2.19095	R1	YjeF family protein	protein coding
CNAG_00922	562	195	2.88205	R1	hypothetical protein	protein coding
CNAG_00926	477	197	2.42132	R1	alpha-1,3/alpha-1,6-mannosyltransferase	protein coding
CNAG_00928	794	426	1.86385	R1	peptidase	protein coding
CNAG_00930	1429	1648	0.867112	R1	Argininosuccinate synthase	protein coding
CNAG_00931	251	123	2.04065	R1	protein transporter	protein coding
CNAG_00933	226	67	3.37313	R1	hypothetical protein	protein coding
CNAG_00934	815	329	2.4772	R1	Allantoinase	protein coding
CNAG_00935	1212	989	1.22548	R1	DNA-binding protein	protein coding
CNAG_00936	694	181	3.83425	R1	lipid particle protein, lipid particle protein, variant	protein coding
CNAG_00938	413	138	2.99275	R1	hypothetical protein	protein coding
CNAG_00941	72	233	0.309013	R1	hypothetical protein	protein coding
CNAG_00961	360	164	2.19512	R1	hypothetical protein	protein coding
CNAG_00964	10	22	0.454545	R1	hypothetical protein	protein coding
CNAG_00966	953	475	2.00632	R1	aromatic-L-amino-acid decarboxylase	protein coding
CNAG_00968	375	155	2.41935	R1	hypothetical protein, hypothetical protein, variant	protein coding
CNAG_00971	530	127	4.17323	R1	vacuolar fusion protein MON1	protein coding
CNAG_00972	677	579	1.16926	R1	hypothetical protein	protein coding
CNAG_00975	309	96	3.21875	R1	hypothetical protein	protein coding
CNAG_00978	1113	800	1.39125	R1	NADH dehydrogenase (ubiquinone) 1 alpha subcomplex 9	protein coding
CNAG_00980	57	222	0.256757	R1	hypothetical protein	protein coding
CNAG_00983	639	140	4.56429	R1	hypothetical protein	protein coding
CNAG_00985	259	151	1.71523	R1	hypothetical protein, hypothetical protein, variant	protein coding
CNAG_00987	569	451	1.26164	R1	prefoldin subunit	protein coding
CNAG_00989	709	325	2.18154	R1	ubiquitin carboxyl-terminal hydrolase L5	protein coding
CNAG_00991	847	519	1.63198	R1	flap endonuclease 1	protein coding
CNAG_00992	1524	1228	1.24104	R1	homocitrate synthase, mitochondrial	protein coding
CNAG_00996	1182	587	2.01363	R1	dolichyl-phosphate-mannose-protein mannosyltransferase	protein coding
CNAG_00998	656	344	1.90698	R1	hypothetical protein, hypothetical protein, variant	protein coding
CNAG_00999	457	153	2.98693	R1	hypothetical protein	protein coding
CNAG_01002	158	93	1.69892	R1	hypothetical protein	protein coding
CNAG_01005	457	438	1.04338	R1	glutaredoxin	protein coding
CNAG_01006	520	252	2.06349	R1	hypothetical protein	protein coding
CNAG_01007	458	271	1.69004	R1	C2 domain-containing protein	protein coding
CNAG_01010	634	431	1.471	R1	hypothetical protein	protein coding
CNAG_01012	387	131	2.9542	R1	hypothetical protein	protein coding
CNAG_01014	790	296	2.66892	R1	hypothetical protein	protein coding
CNAG_01016	357	205	1.74146	R1	vacuolar membrane protein	protein coding
CNAG_01017	551	320	1.72188	R1	E3 ubiquitin-protein ligase SHPRH, E3 ubiquitin-protein ligase SHPRH, variant	protein coding
CNAG_01021	1020	609	1.67488	R1	ATP phosphoribosyltransferase	protein coding
CNAG_01022	470	218	2.15596	R1	hypothetical protein	protein coding
CNAG_01023	1187	619	1.91761	R1	cohesin complex subunit SCC1	protein coding
CNAG_01025	749	186	4.02688	R1	hypothetical protein	protein coding
CNAG_01027	1533	929	1.65016	R1	succinate-semialdehyde dehydrogenase (NADP)	protein coding
CNAG_01029	935	305	3.06557	R1	impact family protein, impact family protein, variant	protein coding
CNAG_01032	42	33	1.27273	R1	hypothetical protein	protein coding
CNAG_01035	809	616	1.31331	R1	20S proteasome subunit alpha 4	protein coding
CNAG_01037	160	200	0.8	R1	DNA mismatch repair protein MLH3	protein coding
CNAG_01039	1082	1116	0.969534	R1	superkiller protein 3	protein coding
CNAG_01040	141	45	3.13333	R1	carboxypeptidase D	protein coding
CNAG_01041	112	61	1.83607	R1	hypothetical protein	protein coding
CNAG_01043	628	701	0.895863	R1	hypothetical protein	protein coding
CNAG_01044	514	302	1.70199	R1	dihydroceramidase	protein coding
CNAG_01045	909	498	1.8253	R1	hypothetical protein	protein coding
CNAG_01046	967	455	2.12527	R1	N,N-dimethylglycine oxidase	protein coding
CNAG_01049	275	326	0.843558	R1	H/ACA ribonucleoprotein complex subunit 3	protein coding
CNAG_01051	1003	662	1.51511	R1	dynactin 1	protein coding
CNAG_01052	865	382	2.2644	R1	hypothetical protein	protein coding
CNAG_01054	872	248	3.51613	R1	RNA polymerase II subunit A domain phosphatase ssu72	protein coding
CNAG_01058	685	368	1.86141	R1	nitric oxide synthase-interacting protein	protein coding
CNAG_01060	832	1031	0.806984	R1	hypothetical protein, hypothetical protein, variant	protein coding
CNAG_01064	348	154	2.25974	R1	hypothetical protein	protein coding
CNAG_01070	39	11	3.54545	R1	class II aldolase/adducin family protein	protein coding
CNAG_01071	508	218	2.33028	R1	hypothetical protein	protein coding
CNAG_01073	117	103	1.13592	R1	hypothetical protein, hypothetical protein, variant	protein coding
CNAG_01078	811	325	2.49538	R1	aldehyde dehydrogenase (NAD)	protein coding
CNAG_01080	68	21	3.2381	R1	Glycolate oxidase	protein coding
CNAG_01081	110	45	2.44444	R1	hypothetical protein	protein coding
CNAG_01082	589	274	2.14964	R1	hypothetical protein	protein coding
CNAG_01086	209	95	2.2	R1	hypothetical protein	protein coding
CNAG_01089	446	297	1.50168	R1	hypothetical protein	protein coding
CNAG_01092	801	515	1.55534	R1	hypothetical protein	protein coding
CNAG_01096	468	265	1.76604	R1	hypothetical protein	protein coding
CNAG_01100	841	345	2.43768	R1	hypothetical protein	protein coding
CNAG_01101	846	593	1.42664	R1	hypothetical protein	protein coding
CNAG_01102	843	481	1.7526	R1	oxidoreductase	protein coding
CNAG_01104	877	531	1.6516	R1	ribosomal RNA-processing protein 8	protein coding
CNAG_01107	660	448	1.47321	R1	phosphatidylinositol glycan, class A	protein coding
CNAG_01109	502	331	1.51662	R1	hypothetical protein	protein coding
CNAG_01111	752	576	1.30556	R1	translation initiation factor 3 subunit K	protein coding
CNAG_01113	479	359	1.33426	R1	hypothetical protein	protein coding
CNAG_01115	635	691	0.918958	R1	hypothetical protein	protein coding
CNAG_01117	3298	2752	1.1984	R1	elongation factor 3	protein coding
CNAG_01118	87	29	3	R1	AAT family amino acid transporter	protein coding
CNAG_01119	1779	1295	1.37375	R1	POT family proton-dependent oligopeptide transporter	protein coding
CNAG_01120	1444	1219	1.18458	R1	pyruvate dehydrogenase complex dihydrolipoamide acetyltransferase	protein coding
CNAG_01121	44	24	1.83333	R1	hypothetical protein	protein coding
CNAG_01124	314	123	2.55285	R1	hypothetical protein	protein coding
CNAG_01126	3545	1111	3.19082	R1	guanine nucleotide exchange protein for ADP- robosylation factor	protein coding
CNAG_01127	229	165	1.38788	R1	hypothetical protein	protein coding
CNAG_01128	715	274	2.60949	R1	Hydroxyacylglutathione hydrolase	protein coding
CNAG_01129	966	370	2.61081	R1	lanosterol synthase	protein coding
CNAG_01130	2199	922	2.38503	R1	hypothetical protein, hypothetical protein, variant	protein coding
CNAG_01131	129	100	1.29	R1	hypothetical protein	protein coding
CNAG_01134	650	287	2.26481	R1	hypothetical protein	protein coding
CNAG_01135	71	70	1.01429	R1	Delta(3,5)-Delta(2,4)-dienoyl-CoA isomerase, delta(3,5)-Delta(2,4)-dienoyl-CoA isomerase, variant 1, delta(3,5)-Delta(2,4)-dienoyl-CoA isomerase, variant 2	protein coding
CNAG_01141	592	272	2.17647	R1	exosome complex component RRP40	protein coding
CNAG_01142	673	239	2.8159	R1	endoplasmic reticulum protein	protein coding
CNAG_01144	1550	867	1.78777	R1	replication factor A1	protein coding
CNAG_01146	1925	1043	1.84564	R1	U3 small nucleolar RNA-associated protein 22	protein coding
CNAG_01148	1245	1163	1.07051	R1	FK506-binding protein 4	protein coding
CNAG_01149	1752	489	3.58282	R1	hypothetical protein	protein coding
CNAG_01151	407	180	2.26111	R1	ubiquitin-conjugating enzyme E2 D/E	protein coding
CNAG_01153	543	557	0.974865	R1	small subunit ribosomal protein S13e	protein coding
CNAG_01154	76	88	0.863636	R1	hypothetical protein	protein coding
CNAG_01156	930	675	1.37778	R1	capsular related protein	protein coding
CNAG_01157	838	447	1.87472	R1	hypothetical protein	protein coding
CNAG_01159	1251	678	1.84513	R1	pre-mRNA-splicing factor slu7	protein coding
CNAG_01162	448	216	2.07407	R1	hypothetical protein	protein coding
CNAG_01164	2177	1368	1.59137	R1	glutamine-fructose-6-phosphate transaminase (isomerizing)	protein coding
CNAG_01166	522	298	1.75168	R1	urease accessory protein	protein coding
CNAG_01168	1461	1223	1.1946	R1	H/ACA ribonucleoprotein complex subunit 4	protein coding
CNAG_01170	547	695	0.78705	R1	small subunit ribosomal protein S17	protein coding
CNAG_01172	712	250	2.848	R1	parallel beta-helix repeat protein	protein coding
CNAG_01175	409	385	1.06234	R1	hypothetical protein	protein coding
CNAG_01177	428	251	1.70518	R1	nuclear envelope-endoplasmic reticulum network protein	protein coding
CNAG_01178	870	251	3.46614	R1	nuclear envelope-endoplasmic reticulum network protein	protein coding
CNAG_01180	359	90	3.98889	R1	hypothetical protein	protein coding
CNAG_01182	1126	913	1.2333	R1	cytoplasmic protein	protein coding
CNAG_01184	605	239	2.53138	R1	hypothetical protein	protein coding
CNAG_01187	894	472	1.89407	R1	ribosome production factor 2	protein coding
CNAG_01188	661	261	2.53257	R1	peroxin-19	protein coding
CNAG_01190	623	469	1.32836	R1	vesicle transporter SEC22	protein coding
CNAG_01192	253	166	1.5241	R1	hypothetical protein	protein coding
CNAG_01193	15	43	0.348837	R1	hypothetical protein, hypothetical protein, variant	protein coding
CNAG_01196	888	417	2.1295	R1	tyrosyl-DNA phosphodiesterase 1	protein coding
CNAG_01197	1044	625	1.6704	R1	ran GTPase-activating protein 1	protein coding
CNAG_01199	1759	461	3.81562	R1	nuclear pore complex protein Nup62	protein coding
CNAG_01201	261	146	1.78767	R1	hypothetical protein	protein coding
CNAG_01207	74	71	1.04225	R1	hypothetical protein	protein coding
CNAG_01208	510	483	1.0559	R1	calcium-channel protein CCH1	protein coding
CNAG_01213	1389	627	2.21531	R1	hypothetical protein	protein coding
CNAG_01216	779	457	1.7046	R1	6-phosphogluconolactonase	protein coding
CNAG_01217	1303	549	2.37341	R1	protein MPE1	protein coding
CNAG_01220	464	157	2.95541	R1	mitochondrial FAD-linked sulfhydryl oxidase ERV1	protein coding
CNAG_01222	921	391	2.3555	R1	hypothetical protein	protein coding
CNAG_01228	511	272	1.87868	R1	hypothetical protein	protein coding
CNAG_01233	1208	490	2.46531	R1	hypothetical protein	protein coding
CNAG_01236	1057	763	1.38532	R1	rRNA-processing protein EBP2	protein coding
CNAG_01237	521	243	2.14403	R1	hypothetical protein	protein coding
CNAG_01239	575	163	3.52761	R1	Chitin deacetylase	protein coding
CNAG_01241	772	397	1.94458	R1	enzyme regulator	protein coding
CNAG_01245	425	494	0.860324	R1	hypothetical protein	protein coding
CNAG_01246	607	340	1.78529	R1	hypothetical protein, hypothetical protein, variant 1, hypothetical protein, variant 2	protein coding
CNAG_01248	1127	384	2.9349	R1	vacuole morphology and inheritance protein 14	protein coding
CNAG_01249	947	243	3.89712	R1	hypothetical protein	protein coding
CNAG_01251	2321	776	2.99098	R1	E3 ubiquitin-protein ligase TRIP12	protein coding
CNAG_01252	159	11	14.4545	R1	thiosulfate/3-mercaptopyruvate sulfurtransferase	protein coding
CNAG_01253	420	414	1.01449	R1	mitochondrial import inner membrane translocase subunit TIM10	protein coding
CNAG_01255	872	430	2.02791	R1	hypothetical protein	protein coding
CNAG_01256	187	72	2.59722	R1	hypothetical protein	protein coding
CNAG_01257	540	130	4.15385	R1	aldo-keto reductase	protein coding
CNAG_01261	2915	589	4.94907	R1	myosin I binding protein	protein coding
CNAG_01262	245	91	2.69231	R1	guanine nucleotide-binding protein subunit beta	protein coding
CNAG_01263	1671	659	2.53566	R1	vacuolar transporter chaperone 4	protein coding
CNAG_01265	332	162	2.04938	R1	charged multivesicular body protein 6	protein coding
CNAG_01266	1671	736	2.27038	R1	ATP-dependent protease La	protein coding
CNAG_01267	515	200	2.575	R1	hypothetical protein	protein coding
CNAG_01270	1282	921	1.39197	R1	hypothetical protein	protein coding
CNAG_01271	950	605	1.57025	R1	pre-mRNA-splicing factor isy1	protein coding
CNAG_01273	646	646	1	R1	cellular nucleic acid-binding protein	protein coding
CNAG_01275	716	519	1.37958	R1	hypothetical protein	protein coding
CNAG_01277	593	628	0.944268	R1	hypothetical protein	protein coding
CNAG_01278	628	698	0.899713	R1	Aminophospholipid translocase, putative	protein coding
CNAG_01279	565	262	2.15649	R1	ubiquitin-conjugating enzyme E2 S, ubiquitin-conjugating enzyme E2 S, variant	protein coding
CNAG_01281	275	205	1.34146	R1	hypothetical protein	protein coding
CNAG_01282	1168	471	2.47983	R1	hypothetical protein	protein coding
CNAG_01285	1100	427	2.57611	R1	AUR protein kinase	protein coding
CNAG_01286	318	92	3.45652	R1	hypothetical protein, hypothetical protein, variant	protein coding
CNAG_01287	1434	1321	1.08554	R1	NADH-ubiquinone oxidoreductase 51 kDa subunit, mitochondrial	protein coding
CNAG_01288	837	483	1.73292	R1	solute carrier family 25, member 33/36	protein coding
CNAG_01290	267	133	2.00752	R1	hypothetical protein	protein coding
CNAG_01292	526	184	2.8587	R1	pol II transcription elongation factor	protein coding
CNAG_01296	1035	402	2.57463	R1	RNA polymerase I-specific transcription initiation factor RRN3	protein coding
CNAG_01298	957	768	1.24609	R1	lysophospholipase NTE1	protein coding
CNAG_01302	357	331	1.07855	R1	hypothetical protein	protein coding
CNAG_01305	1871	1412	1.32507	R1	methionine-tRNA ligase	protein coding
CNAG_01306	491	205	2.39512	R1	chromodomain-helicase-DNA-binding protein 3, chromodomain-helicase-DNA-binding protein 3, variant	protein coding
CNAG_01308	829	306	2.70915	R1	protein NRD1	protein coding
CNAG_01310	843	316	2.66772	R1	Nucleolar protein	protein coding
CNAG_01314	583	414	1.40821	R1	vacuolar protein, vacuolar protein, variant	protein coding
CNAG_01317	631	299	2.11037	R1	hypothetical protein	protein coding
CNAG_01318	933	571	1.63398	R1	sodium/hydrogen exchanger 3	protein coding
CNAG_01319	526	233	2.25751	R1	Microtubule effector PAC2, putative	protein coding
CNAG_01321	445	506	0.879447	R1	acyl carrier protein	protein coding
CNAG_01323	497	574	0.865854	R1	ubiquinol-cytochrome c reductase subunit 7	protein coding
CNAG_01332	528	703	0.751067	R1	small subunit ribosomal protein S24e	protein coding
CNAG_01334	1031	403	2.55831	R1	hypothetical protein, hypothetical protein, variant	protein coding
CNAG_01335	720	243	2.96296	R1	hypothetical protein	protein coding
CNAG_01337	678	219	3.09589	R1	WD-repeat protein, variant, wd-repeat protein	protein coding
CNAG_01339	1924	590	3.26102	R1	cytoplasmic protein	protein coding
CNAG_01340	1940	744	2.60753	R1	ATPase	protein coding
CNAG_01343	374	136	2.75	R1	ATP-dependent Clp protease ATP-binding subunit ClpX	protein coding
CNAG_01345	812	567	1.4321	R1	small subunit ribosomal protein S2	protein coding
CNAG_01346	491	424	1.15802	R1	hypothetical protein	protein coding
CNAG_01348	562	401	1.4015	R1	cyanate hydratase, cyanate hydratase, variant	protein coding
CNAG_01350	718	313	2.29393	R1	putative ubiquitin ligase	protein coding
CNAG_01352	916	727	1.25997	R1	hypothetical protein	protein coding
CNAG_01354	1301	677	1.92171	R1	hypothetical protein	protein coding
CNAG_01355	688	360	1.91111	R1	thioredoxin	protein coding
CNAG_01358	13	13	1	R1	hypothetical protein	protein coding
CNAG_01360	2384	463	5.14903	R1	pumilio domain-containing protein c	protein coding
CNAG_01362	1668	793	2.1034	R1	cell cycle control protein cwf19	protein coding
CNAG_01363	896	413	2.16949	R1	XPA-binding protein 1	protein coding
CNAG_01365	1265	230	5.5	R1	hypothetical protein	protein coding
CNAG_01367	18	132	0.136364	R1	hypothetical protein	protein coding
CNAG_01369	354	260	1.36154	R1	hypothetical protein, hypothetical protein, variant	protein coding
CNAG_01371	640	339	1.88791	R1	Putative regulator of G-protein signaling protein	protein coding
CNAG_01373	823	387	2.12661	R1	septin ring protein	protein coding
CNAG_01375	1565	256	6.11328	R1	Putative actin-binding protein	protein coding
CNAG_01379	264	309	0.854369	R1	hypothetical protein	protein coding
CNAG_01381	673	270	2.49259	R1	hypothetical protein	protein coding
CNAG_01386	42	41	1.02439	R1	phosphatidylinositol glycan, class P	protein coding
CNAG_01389	896	159	5.63522	R1	hypothetical protein	protein coding
CNAG_01391	1289	474	2.71941	R1	cell division cycle protein 37	protein coding
CNAG_01395	913	528	1.72917	R1	Ribose-5-phosphate isomerase	protein coding
CNAG_01398	2322	686	3.38484	R1	ATP-dependent RNA helicase DOB1	protein coding
CNAG_01400	1144	1071	1.06816	R1	3-deoxy-7-phosphoheptulonate synthase	protein coding
CNAG_01402	1114	727	1.53232	R1	actin binding protein	protein coding
CNAG_01403	538	450	1.19556	R1	eclair-PA	protein coding
CNAG_01414	697	335	2.0806	R1	hypothetical protein	protein coding
CNAG_01416	514	245	2.09796	R1	hypothetical protein	protein coding
CNAG_01418	521	287	1.81533	R1	hypothetical protein	protein coding
CNAG_01419	663	269	2.46468	R1	hypothetical protein	protein coding
CNAG_01420	308	140	2.2	R1	hypothetical protein	protein coding
CNAG_01423	1431	469	3.05117	R1	hypothetical protein	protein coding
CNAG_01425	342	44	7.77273	R1	hypothetical protein	protein coding
CNAG_01426	781	572	1.36538	R1	vacuolar protein sorting 26, vacuolar protein sorting 26, variant 1, vacuolar protein sorting 26, variant 2	protein coding
CNAG_01429	564	334	1.68862	R1	hypothetical protein	protein coding
CNAG_01430	715	201	3.55721	R1	hypothetical protein	protein coding
CNAG_01432	1167	727	1.60523	R1	ribosome assembly protein 4, ribosome assembly protein 4, variant	protein coding
CNAG_01436	593	376	1.57713	R1	serine/threonine-protein phosphatase 6 catalytic subunit	protein coding
CNAG_01438	1781	350	5.08857	R1	Cell-cycle box factor subunit SWI6, putative	protein coding
CNAG_01440	487	145	3.35862	R1	hypothetical protein	protein coding
CNAG_01442	1120	484	2.31405	R1	cysteine desulfurase IscS	protein coding
CNAG_01443	292	70	4.17143	R1	hypothetical protein	protein coding
CNAG_01445	511	132	3.87121	R1	autophagy-like protein 9	protein coding
CNAG_01446	342	348	0.982759	R1	heat shock protein, 12Kda	protein coding
CNAG_01448	831	246	3.37805	R1	hypothetical protein	protein coding
CNAG_01451	241	260	0.926923	R1	hypothetical protein	protein coding
CNAG_01454	358	203	1.76355	R1	transcription factor STE12	protein coding
CNAG_01461	206	145	1.42069	R1	sodium/bile acid cotransporter 7-B/bile acid cotransporter 7-B	protein coding
CNAG_01463	304	214	1.42056	R1	hypothetical protein	protein coding
CNAG_01464	1152	658	1.75076	R1	Flavohemoglobin	protein coding
CNAG_01465	263	121	2.17355	R1	5' flap endonuclease	protein coding
CNAG_01466	246	216	1.13889	R1	hypothetical protein	protein coding
CNAG_01468	371	238	1.55882	R1	hypothetical protein	protein coding
CNAG_01470	733	758	0.967018	R1	NADH dehydrogenase (ubiquinone) flavoprotein 2	protein coding
CNAG_01472	535	238	2.2479	R1	endoplasmic reticulum protein	protein coding
CNAG_01474	70	82	0.853659	R1	hypothetical protein, hypothetical protein, variant	protein coding
CNAG_01475	1111	834	1.33213	R1	sphingolipid C9-methyltransferase	protein coding
CNAG_01477	1507	442	3.4095	R1	Serine palmitoyltransferase	protein coding
CNAG_01479	491	269	1.82528	R1	hypothetical protein	protein coding
CNAG_01480	605	667	0.907046	R1	large subunit ribosomal protein L12	protein coding
CNAG_01483	533	260	2.05	R1	E3 ubiquitin ligase-like protein	protein coding
CNAG_01485	1025	572	1.79196	R1	D-lactate dehydrogenase (cytochrome)	protein coding
CNAG_01491	421	333	1.26426	R1	hypothetical protein	protein coding
CNAG_01493	182	123	1.47967	R1	hypothetical protein, hypothetical protein, variant	protein coding
CNAG_01497	41	75	0.546667	R1	Integral membrane protein	protein coding
CNAG_01499	51	68	0.75	R1	hypothetical protein, hypothetical protein, variant	protein coding
CNAG_01501	235	144	1.63194	R1	hypothetical protein	protein coding
CNAG_01504	401	373	1.07507	R1	hypothetical protein	protein coding
CNAG_01506	14	14	1	R1	hypothetical protein	protein coding
CNAG_01508	1404	551	2.54809	R1	hypothetical protein	protein coding
CNAG_01510	1280	522	2.45211	R1	hypothetical protein	protein coding
CNAG_01519	165	42	3.92857	R1	endonuclease/exonuclease/phosphatase	protein coding
CNAG_01521	279	112	2.49107	R1	metallo-beta-lactamase	protein coding
CNAG_01523	1161	901	1.28857	R1	putative mitogen-activated protein kinase HOG1	protein coding
CNAG_01524	432	286	1.51049	R1	hypothetical protein	protein coding
CNAG_01526	1620	637	2.54317	R1	cleavage and polyadenylation specificity factor subunit 4	protein coding
CNAG_01528	705	315	2.2381	R1	hypothetical protein	protein coding
CNAG_01529	563	179	3.14525	R1	solute carrier family 25 (mitochondrial phosphate transporter), member 23/24/25/41	protein coding
CNAG_01531	729	247	2.95142	R1	DNA helicase II/ATP-dependent DNA helicase PcrA	protein coding
CNAG_01535	1035	573	1.80628	R1	Amino acid permease	protein coding
CNAG_01536	1451	387	3.74935	R1	myosin heavy chain	protein coding
CNAG_01538	13	21	0.619048	R1	hypothetical protein	protein coding
CNAG_01539	1558	1123	1.38736	R1	Myo-inositol-1-phosphate synthase	protein coding
CNAG_01540	398	47	8.46809	R1	dehydrogenase	protein coding
CNAG_01542	220	28	7.85714	R1	taurine catabolism dioxygenase TauD	protein coding
CNAG_01544	1501	933	1.60879	R1	histidyl-tRNA synthetase	protein coding
CNAG_01546	425	140	3.03571	R1	S-adenosylmethionine-dependent methyltransferase	protein coding
CNAG_01548	1125	894	1.25839	R1	ATP-dependent RNA helicase FAL1	protein coding
CNAG_01551	487	234	2.0812	R1	GATA family transcription factor	protein coding
CNAG_01554	848	283	2.99647	R1	sorting nexin-4	protein coding
CNAG_01556	1121	569	1.97012	R1	cytoplasmic protein	protein coding
CNAG_01559	1302	470	2.77021	R1	hypothetical protein	protein coding
CNAG_01560	45	25	1.8	R1	hypothetical protein	protein coding
CNAG_01563	1171	640	1.82969	R1	histone deacetylase 6/10	protein coding
CNAG_01566	871	188	4.63298	R1	gamma-tubulin complex component 3	protein coding
CNAG_01568	1548	1004	1.54183	R1	T-complex protein 1 subunit alpha	protein coding
CNAG_01570	56	23	2.43478	R1	hypothetical protein, hypothetical protein, variant	protein coding
CNAG_01573	1091	441	2.47392	R1	hypothetical protein, hypothetical protein, variant	protein coding
CNAG_01577	1457	1454	1.00206	R1	glutamate dehydrogenase (NADP)	protein coding
CNAG_01579	923	341	2.70674	R1	vacuolar membrane-associated protein IML1	protein coding
CNAG_01583	632	452	1.39823	R1	vacuolar-sorting protein SNF7	protein coding
CNAG_01584	243	50	4.86	R1	hydrolase	protein coding
CNAG_01586	780	774	1.00775	R1	F-type H -transporting ATPase subunit B	protein coding
CNAG_01591	1270	359	3.5376	R1	hypothetical protein	protein coding
CNAG_01593	1105	409	2.70171	R1	ribosome biogenesis protein SSF1/2	protein coding
CNAG_01595	646	361	1.78947	R1	hypothetical protein	protein coding
CNAG_01597	515	272	1.89338	R1	hypothetical protein	protein coding
CNAG_01599	506	190	2.66316	R1	hypothetical protein	protein coding
CNAG_01601	168	74	2.27027	R1	lipase	protein coding
CNAG_01602	274	184	1.48913	R1	IQ domain-containing calmodulin-binding protein	protein coding
CNAG_01603	320	418	0.76555	R1	hypothetical protein	protein coding
CNAG_01604	241	64	3.76562	R1	TIGR01458 family HAD hydrolase, TIGR01458 family HAD hydrolase, variant	protein coding
CNAG_01607	449	361	1.24377	R1	thioredoxin	protein coding
CNAG_01610	1445	391	3.69565	R1	hypothetical protein	protein coding
CNAG_01613	1069	326	3.27914	R1	hypothetical protein, hypothetical protein, variant	protein coding
CNAG_01616	1432	727	1.96974	R1	hypothetical protein	protein coding
CNAG_01620	667	267	2.49813	R1	hypothetical protein	protein coding
CNAG_01622	442	329	1.34347	R1	CTD kinase subunit beta	protein coding
CNAG_01624	179	226	0.792035	R1	hypothetical protein	protein coding
CNAG_01626	793	456	1.73904	R1	transcriptional adapter 2-alpha	protein coding
CNAG_01628	450	506	0.889328	R1	small subunit ribosomal protein S20	protein coding
CNAG_01630	1032	338	3.05325	R1	polyadenylation factor subunit 2	protein coding
CNAG_01632	611	192	3.18229	R1	Triacylglycerol lipase, triacylglycerol lipase, variant	protein coding
CNAG_01636	519	390	1.33077	R1	peptidyl-prolyl cis-trans isomerase-like 1	protein coding
CNAG_01638	528	403	1.31017	R1	mitotic spindle assembly checkpoint protein MAD2	protein coding
CNAG_01640	402	674	0.596439	R1	Cold sensitive for fermentation protein 1, putative	protein coding
CNAG_01642	915	391	2.34015	R1	DNA mismatch repair protein MSH3, DNA mismatch repair protein MSH3, variant	protein coding
CNAG_01644	770	438	1.75799	R1	hypothetical protein	protein coding
CNAG_01646	737	243	3.03292	R1	rab escort protein	protein coding
CNAG_01648	459	492	0.932927	R1	Histone H4	protein coding
CNAG_01649	1288	447	2.88143	R1	hypothetical protein	protein coding
CNAG_01651	34	47	0.723404	R1	glicosidase	protein coding
CNAG_01652	440	157	2.80255	R1	peptide-N4-(N-acetyl-beta- glucosaminyl)asparagine amidase	protein coding
CNAG_01654	490	206	2.37864	R1	putative capsule structure designer protein	protein coding
CNAG_01655	2185	730	2.99315	R1	dynamin GTPase	protein coding
CNAG_01656	488	112	4.35714	R1	hypothetical protein	protein coding
CNAG_01659	565	175	3.22857	R1	hypothetical protein	protein coding
CNAG_01663	511	299	1.70903	R1	dynactin 4	protein coding
CNAG_01665	500	189	2.6455	R1	tRNA-splicing endonuclease subunit sen34	protein coding
CNAG_01669	802	213	3.76526	R1	metallo-beta-lactamase	protein coding
CNAG_01671	11	11	1	R1	acetyl/propionyl CoA carboxylase	protein coding
CNAG_01673	1081	429	2.51981	R1	hypothetical protein, hypothetical protein, variant	protein coding
CNAG_01676	1288	597	2.15745	R1	tRNA (adenine-N(1)-)-methyltransferase non- catalytic subunit TRM6	protein coding
CNAG_01678	617	661	0.933434	R1	Na /H exchanger AnNHA1	protein coding
CNAG_01682	1585	1426	1.1115	R1	mitochondrial outer membrane 72K protein	protein coding
CNAG_01686	645	336	1.91964	R1	hypothetical protein	protein coding
CNAG_01691	365	351	1.03989	R1	hypothetical protein, hypothetical protein, variant	protein coding
CNAG_01692	696	299	2.32776	R1	rub1/nedd8 activating enzyme	protein coding
CNAG_01695	15	45	0.333333	R1	hypothetical protein	protein coding
CNAG_01697	788	408	1.93137	R1	COP9 signalosome subunit 12-like protein	protein coding
CNAG_01698	164	197	0.832487	R1	hypothetical protein	protein coding
CNAG_01699	213	136	1.56618	R1	histone deacetylase 1/2	protein coding
CNAG_01703	87	102	0.852941	R1	hypothetical protein	protein coding
CNAG_01704	1890	1197	1.57895	R1	serine/threonine protein kinase	protein coding
CNAG_01707	337	314	1.07325	R1	Putative regulator of G-protein signaling protein	protein coding
CNAG_01709	1264	731	1.72914	R1	translation initiation factor 5	protein coding
CNAG_01711	1689	792	2.13258	R1	glycerol-3-phosphate O- acyltransferase/dihydroxyacetone phosphate acyltransferase	protein coding
CNAG_01713	477	338	1.41124	R1	hypothetical protein	protein coding
CNAG_01714	17	19	0.894737	R1	sulfonate dioxygenase	protein coding
CNAG_01715	2078	890	2.33483	R1	ribosome biogenesis protein BMS1	protein coding
CNAG_01717	856	213	4.01878	R1	cell differentiation protein rcd1	protein coding
CNAG_01720	578	203	2.84729	R1	ESCRT-I complex subunit TSG101	protein coding
CNAG_01723	568	373	1.52279	R1	hypothetical protein	protein coding
CNAG_01725	70	51	1.37255	R1	hypothetical protein, hypothetical protein, variant	protein coding
CNAG_01730	530	205	2.58537	R1	STE/STE7/MEK1 protein kinase	protein coding
CNAG_01731	365	246	1.48374	R1	hypothetical protein	protein coding
CNAG_01733	1318	893	1.47592	R1	pre-mRNA-processing factor 19	protein coding
CNAG_01735	233	229	1.01747	R1	hypothetical protein	protein coding
CNAG_01736	177	280	0.632143	R1	DASH complex subunit dad4	protein coding
CNAG_01738	1049	240	4.37083	R1	hypothetical protein	protein coding
CNAG_01740	980	506	1.93676	R1	septin	protein coding
CNAG_01744	1231	745	1.65235	R1	phosphatase	protein coding
CNAG_01746	353	131	2.69466	R1	E3 ubiquitin-protein ligase RNF14	protein coding
CNAG_01749	293	180	1.62778	R1	hypothetical protein	protein coding
CNAG_01750	1946	1142	1.70403	R1	hsp72-like protein	protein coding
CNAG_01752	880	769	1.14434	R1	solute carrier family 25 (mitochondrial 2- oxodicarboxylate transporter), member 21	protein coding
CNAG_01754	1335	510	2.61765	R1	hypothetical protein	protein coding
CNAG_01756	491	363	1.35262	R1	mitochondrial import inner membrane translocase subunit tim22	protein coding
CNAG_01760	66	76	0.868421	R1	hypothetical protein	protein coding
CNAG_01761	694	705	0.984397	R1	hypothetical protein	protein coding
CNAG_01763	418	167	2.50299	R1	cytoplasmic protein	protein coding
CNAG_01765	529	286	1.84965	R1	hypothetical protein, hypothetical protein, variant	protein coding
CNAG_01769	1401	486	2.88272	R1	solute carrier family 25 (mitochondrial aspartate/glutamate transporter), member 12/13	protein coding
CNAG_01770	1345	525	2.5619	R1	mitochondrion organization and biogenesis-related protein, putative	protein coding
CNAG_01772	936	694	1.3487	R1	hypothetical protein	protein coding
CNAG_01777	720	211	3.41232	R1	glyoxylate reductase	protein coding
CNAG_01779	665	258	2.57752	R1	hypothetical protein	protein coding
CNAG_01781	30	127	0.23622	R1	hypothetical protein, hypothetical protein, variant 1, hypothetical protein, variant 2, hypothetical protein, variant 3	protein coding
CNAG_01787	137	102	1.34314	R1	hypothetical protein	protein coding
CNAG_01788	756	719	1.05146	R1	tRNA(His) guanylyltransferase	protein coding
CNAG_01790	583	282	2.06738	R1	upstream activation factor subunit UAF30	protein coding
CNAG_01791	1102	605	1.82149	R1	ribosome production factor 1	protein coding
CNAG_01795	432	118	3.66102	R1	hypothetical protein	protein coding
CNAG_01797	714	335	2.13134	R1	hypothetical protein	protein coding
CNAG_01799	399	402	0.992537	R1	ubiquinol-cytochrome c reductase subunit 8	protein coding
CNAG_01802	809	239	3.38494	R1	Fe-S cluster assembly protein DRE2	protein coding
CNAG_01808	673	614	1.09609	R1	solute carrier family 25, member 34/35	protein coding
CNAG_01810	363	280	1.29643	R1	DNA-directed RNA polymerase I subunit RPA12	protein coding
CNAG_01812	601	388	1.54897	R1	large subunit ribosomal protein L24e	protein coding
CNAG_01815	889	210	4.23333	R1	hypothetical protein	protein coding
CNAG_01817	1196	533	2.2439	R1	signal recognition particle receptor subunit alpha	protein coding
CNAG_01819	865	586	1.47611	R1	large subunit ribosomal protein L1	protein coding
CNAG_01823	761	614	1.23941	R1	myo-inositol-1(or 4)-monophosphatase, myo-inositol-1(or 4)-monophosphatase, variant	protein coding
CNAG_01825	435	196	2.21939	R1	hypothetical protein	protein coding
CNAG_01826	855	353	2.4221	R1	transcription initiation factor TFIIH subunit 1	protein coding
CNAG_01832	432	223	1.93722	R1	hypothetical protein	protein coding
CNAG_01834	670	435	1.54023	R1	hypothetical protein, hypothetical protein, variant	protein coding
CNAG_01835	312	137	2.27737	R1	hypothetical protein	protein coding
CNAG_01837	1669	536	3.11381	R1	vacuolar protein sorting-associated protein VPS35	protein coding
CNAG_01839	603	564	1.06915	R1	peptidyl-prolyl cis-trans isomerase NIMA- interacting 1	protein coding
CNAG_01842	1041	558	1.86559	R1	hypothetical protein	protein coding
CNAG_01844	319	149	2.14094	R1	tetracycline efflux protein	protein coding
CNAG_01845	2165	886	2.44357	R1	AGC/PKC protein kinase	protein coding
CNAG_01847	87	52	1.67308	R1	hypothetical protein	protein coding
CNAG_01848	994	661	1.50378	R1	hypothetical protein	protein coding
CNAG_01849	30	27	1.11111	R1	hypothetical protein	protein coding
CNAG_01850	2172	658	3.30091	R1	Two-component-like sensor kinase	protein coding
CNAG_01852	1203	868	1.38594	R1	CCR4-NOT transcription complex subunit 2	protein coding
CNAG_01854	2079	1815	1.14545	R1	heparinase II/III family protein	protein coding
CNAG_01859	863	358	2.41061	R1	hypothetical protein	protein coding
CNAG_01866	70	79	0.886076	R1	hypothetical protein	protein coding
CNAG_01867	952	431	2.20882	R1	mitochondrial division protein 1	protein coding
CNAG_01869	533	310	1.71935	R1	hypothetical protein	protein coding
CNAG_01870	737	681	1.08223	R1	electron transfer flavoprotein beta subunit	protein coding
CNAG_01874	410	226	1.81416	R1	Glutathione S-transferase	protein coding
CNAG_01876	639	178	3.58989	R1	TBC1 domain family member 5	protein coding
CNAG_01878	658	295	2.23051	R1	myo-inositol 2-dehydrogenase	protein coding
CNAG_01879	520	205	2.53659	R1	cathepsin A (carboxypeptidase C)	protein coding
CNAG_01880	884	265	3.33585	R1	hypothetical protein	protein coding
CNAG_01882	458	103	4.4466	R1	histone-lysine N-methyltransferase, H3 lysine-79 specific	protein coding
CNAG_01883	25	49	0.510204	R1	hypothetical protein	protein coding
CNAG_01885	897	296	3.03041	R1	DNA polymerase sigma subunit	protein coding
CNAG_01889	345	67	5.14925	R1	Glutathione S-transferase	protein coding
CNAG_01892	810	321	2.52336	R1	hypothetical protein	protein coding
CNAG_01894	1139	498	2.28715	R1	aspartate-tRNA ligase	protein coding
CNAG_01896	1099	1121	0.980375	R1	alcohol dehydrogenase (NADP)	protein coding
CNAG_01897	1977	875	2.25943	R1	bromodomain-containing factor 1	protein coding
CNAG_01898	1083	529	2.04726	R1	protein MAK11	protein coding
CNAG_01900	697	281	2.48043	R1	hypothetical protein	protein coding
CNAG_01903	1561	282	5.53546	R1	hypothetical protein	protein coding
CNAG_01905	2190	912	2.40132	R1	serine/threonine protein kinase	protein coding
CNAG_01912	1569	716	2.19134	R1	NAD synthetase	protein coding
CNAG_01914	527	340	1.55	R1	mitochondrial protein	protein coding
CNAG_01915	1183	989	1.19616	R1	ribonucleoside-diphosphate reductase subunit M2	protein coding
CNAG_01917	402	199	2.0201	R1	ribonuclease P protein subunit POP4	protein coding
CNAG_01919	473	204	2.31863	R1	hypothetical protein	protein coding
CNAG_01921	35	14	2.5	R1	hypothetical protein	protein coding
CNAG_01923	845	443	1.90745	R1	ATPase GET3	protein coding
CNAG_01924	387	160	2.41875	R1	hypothetical protein	protein coding
CNAG_01925	36	15	2.4	R1	hypothetical protein	protein coding
CNAG_01926	431	109	3.95413	R1	peroxisome targeting signal receptor	protein coding
CNAG_01927	308	96	3.20833	R1	hypothetical protein	protein coding
CNAG_01930	520	323	1.60991	R1	endopeptidase	protein coding
CNAG_01937	20	19	1.05263	R1	hypothetical protein, hypothetical protein, variant	protein coding
CNAG_01940	259	148	1.75	R1	Alpha-amylase, alpha-amylase, variant	protein coding
CNAG_01942	205	91	2.25275	R1	hypothetical protein	protein coding
CNAG_01945	15	11	1.36364	R1	hypothetical protein	protein coding
CNAG_01950	731	285	2.56491	R1	hypothetical protein, hypothetical protein, variant	protein coding
CNAG_01953	123	106	1.16038	R1	hypothetical protein	protein coding
CNAG_01957	754	464	1.625	R1	20S proteasome subunit beta 7	protein coding
CNAG_01960	39	14	2.78571	R1	efflux protein EncT	protein coding
CNAG_01962	494	143	3.45455	R1	ubiquinone biosynthesis protein COQ4, mitochondrial	protein coding
CNAG_01964	116	85	1.36471	R1	OPT family small oligopeptide transporter	protein coding
CNAG_01965	72	17	4.23529	R1	hypothetical protein	protein coding
CNAG_01972	57	134	0.425373	R1	C2H2 zinc finger protein Zas1A, C2H2 zinc finger protein Zas1A, variant	protein coding
CNAG_01973	1402	584	2.40068	R1	C2H2 zinc finger protein Zas1A	protein coding
CNAG_01975	1027	317	3.23975	R1	helicase	protein coding
CNAG_01978	296	96	3.08333	R1	Ras processing enzyme 1, putative	protein coding
CNAG_01981	1154	776	1.48711	R1	sulfide:quinone oxidoreductase	protein coding
CNAG_01984	1063	1006	1.05666	R1	transaldolase	protein coding
CNAG_01986	407	284	1.4331	R1	hypothetical protein	protein coding
CNAG_01988	2897	672	4.31101	R1	bacteriophytochrome histidine kinase, bacteriophytochrome histidine kinase, variant	protein coding
CNAG_01990	826	981	0.841998	R1	small subunit ribosomal protein S5	protein coding
CNAG_01992	21	20	1.05	R1	hypothetical protein	protein coding
CNAG_01994	21	11	1.90909	R1	hypothetical protein	protein coding
CNAG_01996	592	159	3.72327	R1	hypothetical protein, hypothetical protein, variant	protein coding
CNAG_02001	1349	297	4.54209	R1	inositol-polyphosphate 5-phosphatase	protein coding
CNAG_02007	847	927	0.9137	R1	adenylate kinase 1	protein coding
CNAG_02010	154	132	1.16667	R1	tartrate transporter, tartrate transporter, variant	protein coding
CNAG_02013	181	170	1.06471	R1	hypothetical protein, hypothetical protein, variant	protein coding
CNAG_02021	473	328	1.44207	R1	N-terminal acetyltransferase A complex catalytic subunit ard1	protein coding
CNAG_02022	918	650	1.41231	R1	DNA-directed RNA polymerase II subunit RPB3	protein coding
CNAG_02023	24	37	0.648649	R1	hypothetical protein, hypothetical protein, variant	protein coding
CNAG_02025	955	383	2.49347	R1	DNA-directed RNA polymerase III subunit RPC3	protein coding
CNAG_02027	177	86	2.05814	R1	hypothetical protein	protein coding
CNAG_02028	1162	315	3.68889	R1	CMGC/SRPK protein kinase	protein coding
CNAG_02030	1771	999	1.77277	R1	glyoxal oxidase	protein coding
CNAG_02033	376	243	1.54733	R1	hypothetical protein	protein coding
CNAG_02035	806	717	1.12413	R1	triose-phosphate isomerase	protein coding
CNAG_02037	701	465	1.50753	R1	large subunit ribosomal protein L22	protein coding
CNAG_02039	50	19	2.63158	R1	Integral membrane protein, integral membrane protein, variant	protein coding
CNAG_02043	121	49	2.46939	R1	hypothetical protein, hypothetical protein, variant	protein coding
CNAG_02045	59	17	3.47059	R1	acetoacetate-CoA ligase	protein coding
CNAG_02048	1389	998	1.39178	R1	Proline dehydrogenase	protein coding
CNAG_02049	122	53	2.30189	R1	Proline dehydrogenase	protein coding
CNAG_02051	1074	272	3.94853	R1	kinesin family member 20/23	protein coding
CNAG_02057	436	226	1.9292	R1	urease accessory protein	protein coding
CNAG_02059	498	310	1.60645	R1	CCR4-Not complex subunit Caf16	protein coding
CNAG_02060	643	271	2.37269	R1	hypothetical protein	protein coding
CNAG_02062	28	121	0.231405	R1	glycoside hydrolase family 2	protein coding
CNAG_02066	17	31	0.548387	R1	hypothetical protein	protein coding
CNAG_02068	992	331	2.99698	R1	stromal membrane-associated protein	protein coding
CNAG_02071	1252	424	2.95283	R1	putative scaffold protein	protein coding
CNAG_02073	570	314	1.81529	R1	DNA mismatch repair protein MLH1	protein coding
CNAG_02075	637	318	2.00314	R1	hypothetical protein	protein coding
CNAG_02078	854	376	2.27128	R1	hydrolase	protein coding
CNAG_02079	2627	947	2.77402	R1	cytoplasmic protein	protein coding
CNAG_02080	861	441	1.95238	R1	hypothetical protein, hypothetical protein, variant	protein coding
CNAG_02082	245	182	1.34615	R1	DASH complex subunit DAD1	protein coding
CNAG_02083	22	15	1.46667	R1	siderochrome-iron transporter	protein coding
CNAG_02084	1053	683	1.54173	R1	farnesyl diphosphate synthase	protein coding
CNAG_02086	947	649	1.45917	R1	Acyl-CoA-dependent ceramide synthase	protein coding
CNAG_02087	12	19	0.631579	R1	Acyl-CoA-dependent ceramide synthase	protein coding
CNAG_02088	884	495	1.78586	R1	hypothetical protein	protein coding
CNAG_02089	141	50	2.82	R1	hypothetical protein	protein coding
CNAG_02090	519	222	2.33784	R1	guanine nucleotide-binding protein G(o) subunit alpha	protein coding
CNAG_02091	1261	1072	1.17631	R1	nucleosome assembly protein 1-like 1	protein coding
CNAG_02092	917	306	2.99673	R1	protein EFR3	protein coding
CNAG_02094	823	583	1.41166	R1	ARP2/3 complex 34 kDa subunit	protein coding
CNAG_02095	1377	818	1.68337	R1	cyclin	protein coding
CNAG_02096	329	79	4.16456	R1	peroxin-16	protein coding
CNAG_02100	3960	1949	2.03181	R1	fatty acid synthase subunit alpha, fungi type	protein coding
CNAG_02101	421	236	1.7839	R1	hypothetical protein	protein coding
CNAG_02103	29	109	0.266055	R1	hypothetical protein, hypothetical protein, variant	protein coding
CNAG_02104	301	61	4.93443	R1	phosphatidylinositol transfer protein SFH5	protein coding
CNAG_02106	644	371	1.73585	R1	mitochondrial intermembrane space import and assembly protein 40	protein coding
CNAG_02110	1980	787	2.51588	R1	peptide alpha-N-acetyltransferase	protein coding
CNAG_02112	303	186	1.62903	R1	ubiquitin-conjugating enzyme E2 W	protein coding
CNAG_02116	266	136	1.95588	R1	arf/Sar family protein	protein coding
CNAG_02117	826	370	2.23243	R1	NAD-binding Rossmann fold oxidoreductase	protein coding
CNAG_02119	381	346	1.10116	R1	hypothetical protein	protein coding
CNAG_02122	680	267	2.54682	R1	cytoplasmic tRNA 2-thiolation protein 1	protein coding
CNAG_02124	219	151	1.45033	R1	hypothetical protein	protein coding
CNAG_02128	785	775	1.0129	R1	translation initiation factor 3 subunit J	protein coding
CNAG_02129	2476	895	2.76648	R1	hypothetical protein	protein coding
CNAG_02130	1512	1040	1.45385	R1	RNA-binding protein 39	protein coding
CNAG_02132	185	71	2.60563	R1	hypothetical protein	protein coding
CNAG_02134	1678	755	2.22252	R1	rsc chromatin remodeling complex subunit	protein coding
CNAG_02138	555	223	2.48879	R1	DNA replication ATP-dependent helicase dna2	protein coding
CNAG_02139	1140	544	2.09559	R1	oxysterol-binding protein	protein coding
CNAG_02140	448	426	1.05164	R1	NADH dehydrogenase (ubiquinone) 1 alpha subcomplex 12	protein coding
CNAG_02143	204	117	1.74359	R1	hypothetical protein, hypothetical protein, variant	protein coding
CNAG_02145	465	373	1.24665	R1	hypothetical protein	protein coding
CNAG_02148	467	262	1.78244	R1	ubiquitin-conjugating enzyme E2 35, ubiquitin-conjugating enzyme E2 35, variant	protein coding
CNAG_02150	220	95	2.31579	R1	mRNA methyltransferase	protein coding
CNAG_02151	787	299	2.63211	R1	amidohydrolase	protein coding
CNAG_02154	775	397	1.95214	R1	anaphase-promoting complex subunit 6	protein coding
CNAG_02157	491	139	3.53237	R1	hypothetical protein	protein coding
CNAG_02159	77	176	0.4375	R1	hypothetical protein	protein coding
CNAG_02160	54	25	2.16	R1	hypothetical protein, hypothetical protein, variant	protein coding
CNAG_02161	1677	394	4.25635	R1	cortical actin cytoskeleton protein asp1	protein coding
CNAG_02163	584	105	5.5619	R1	hypothetical protein	protein coding
CNAG_02165	1059	235	4.50638	R1	cytoplasmic protein	protein coding
CNAG_02167	1133	155	7.30968	R1	vacuolar protein sorting-associated protein 27	protein coding
CNAG_02170	121	62	1.95161	R1	hypothetical protein	protein coding
CNAG_02173	514	114	4.50877	R1	transporter particle component	protein coding
CNAG_02175	2413	469	5.14499	R1	5'-3' exoribonuclease 1	protein coding
CNAG_02176	150	225	0.666667	R1	hypothetical protein	protein coding
CNAG_02177	956	875	1.09257	R1	serine/threonine-protein phosphatase PP2A catalytic subunit	protein coding
CNAG_02178	1126	312	3.60897	R1	hypothetical protein	protein coding
CNAG_02179	697	206	3.3835	R1	Hemolysin	protein coding
CNAG_02183	1066	642	1.66044	R1	anaphase-promoting complex subunit 1	protein coding
CNAG_02186	335	140	2.39286	R1	myosin regulatory light chain	protein coding
CNAG_02189	1384	692	2	R1	Alpha-amylase	protein coding
CNAG_02191	437	198	2.20707	R1	hypothetical protein	protein coding
CNAG_02194	1307	230	5.68261	R1	AGC/NDR protein kinase	protein coding
CNAG_02197	774	341	2.26979	R1	hypothetical protein	protein coding
CNAG_02201	704	89	7.91011	R1	hypothetical protein	protein coding
CNAG_02202	602	442	1.36199	R1	Adenylylsulfate kinase	protein coding
CNAG_02204	793	405	1.95802	R1	endonuclease G, mitochondrial	protein coding
CNAG_02205	448	197	2.27411	R1	pH-response regulator protein palC, pH-response regulator protein palC, variant	protein coding
CNAG_02207	179	172	1.0407	R1	hypothetical protein	protein coding
CNAG_02210	831	157	5.29299	R1	ribonuclease Z	protein coding
CNAG_02213	1284	445	2.88539	R1	epsin	protein coding
CNAG_02215	331	192	1.72396	R1	transcriptional activator, transcriptional activator, variant	protein coding
CNAG_02217	52	31	1.67742	R1	Chitin synthase	protein coding
CNAG_02218	409	297	1.3771	R1	hypothetical protein	protein coding
CNAG_02220	591	472	1.25212	R1	hypothetical protein	protein coding
CNAG_02222	782	223	3.50673	R1	phosphopantothenate-cysteine ligase	protein coding
CNAG_02224	441	97	4.54639	R1	hypothetical protein, hypothetical protein, variant	protein coding
CNAG_02226	105	33	3.18182	R1	hypothetical protein	protein coding
CNAG_02230	1614	736	2.19293	R1	phosphoketolase	protein coding
CNAG_02231	752	456	1.64912	R1	cytosolic Fe-S cluster assembly factor NBP35	protein coding
CNAG_02233	793	516	1.53682	R1	serine/threonine-protein kinase ATR	protein coding
CNAG_02235	498	364	1.36813	R1	hypothetical protein	protein coding
CNAG_02237	2435	978	2.48978	R1	actin cortical patch component	protein coding
CNAG_02240	1552	751	2.06658	R1	cytoplasmic protein	protein coding
CNAG_02255	31	16	1.9375	R1	BNR/Asp-box repeat family protein	protein coding
CNAG_02258	494	460	1.07391	R1	hypothetical protein, hypothetical protein, variant	protein coding
CNAG_02261	656	311	2.10932	R1	hypothetical protein	protein coding
CNAG_02263	778	473	1.64482	R1	hypothetical protein	protein coding
CNAG_02268	563	168	3.35119	R1	nuclear membrane protein	protein coding
CNAG_02269	627	173	3.62428	R1	autophagy-like protein 18 Atg18	protein coding
CNAG_02281	1227	237	5.17722	R1	hypothetical protein, hypothetical protein, variant 1, hypothetical protein, variant 2	protein coding
CNAG_02282	632	369	1.71274	R1	carboxypeptidase A4, carboxypeptidase A4, variant	protein coding
CNAG_02285	539	594	0.907407	R1	nucleoside diphosphate kinase	protein coding
CNAG_02287	628	221	2.84163	R1	hypothetical protein	protein coding
CNAG_02290	977	305	3.20328	R1	parafibromin	protein coding
CNAG_02293	598	302	1.98013	R1	hypothetical protein, hypothetical protein, variant	protein coding
CNAG_02295	105	43	2.44186	R1	phosphotransferase enzyme family protein	protein coding
CNAG_02298	885	370	2.39189	R1	niemann-Pick C1 protein	protein coding
CNAG_02301	1502	1152	1.30382	R1	lupus La protein	protein coding
CNAG_02302	55	31	1.77419	R1	hypothetical protein, hypothetical protein, variant	protein coding
CNAG_02304	442	295	1.49831	R1	mitochondrial distribution and morphology protein 34	protein coding
CNAG_02306	653	268	2.43657	R1	molybdopterin binding domain-containing protein	protein coding
CNAG_02307	471	321	1.46729	R1	L-serine ammonia-lyase	protein coding
CNAG_02308	577	240	2.40417	R1	hypothetical protein	protein coding
CNAG_02310	612	471	1.29936	R1	casein kinase II subunit beta	protein coding
CNAG_02313	261	186	1.40323	R1	hypothetical protein, hypothetical protein, variant	protein coding
CNAG_02314	296	121	2.44628	R1	hypothetical protein	protein coding
CNAG_02315	868	882	0.984127	R1	ubiquinol-cytochrome c reductase, iron-sulfur subunit	protein coding
CNAG_02318	795	152	5.23026	R1	hypothetical protein, hypothetical protein, variant	protein coding
CNAG_02323	396	509	0.777996	R1	hypothetical protein	protein coding
CNAG_02326	1556	744	2.0914	R1	V-type proton ATPase catalytic subunit A	protein coding
CNAG_02327	1353	920	1.47065	R1	xaa-Pro dipeptidase	protein coding
CNAG_02328	1890	862	2.19258	R1	pre-rRNA-processing protein TSR1	protein coding
CNAG_02331	719	737	0.975577	R1	small subunit ribosomal protein S9	protein coding
CNAG_02333	310	157	1.97452	R1	hypothetical protein	protein coding
CNAG_02335	1441	966	1.49172	R1	hypothetical protein	protein coding
CNAG_02337	662	448	1.47768	R1	Uracil phosphoribosyltransferase	protein coding
CNAG_02338	747	984	0.759146	R1	cellular nucleic acid-binding protein	protein coding
CNAG_02340	366	202	1.81188	R1	hypothetical protein	protein coding
CNAG_02342	294	147	2	R1	hypothetical protein	protein coding
CNAG_02343	290	209	1.38756	R1	hypothetical protein	protein coding
CNAG_02345	299	251	1.19124	R1	Polycomb protein EED	protein coding
CNAG_02348	389	157	2.47771	R1	hypothetical protein	protein coding
CNAG_02349	241	69	3.49275	R1	hypothetical protein	protein coding
CNAG_02351	365	269	1.35688	R1	endochitinase	protein coding
CNAG_02354	1116	516	2.16279	R1	large subunit ribosomal protein L2	protein coding
CNAG_02356	461	193	2.3886	R1	phosphatidylinositol glycan, class F	protein coding
CNAG_02358	575	272	2.11397	R1	MRP family ATP-binding protein	protein coding
CNAG_02364	213	147	1.44898	R1	hypothetical protein	protein coding
CNAG_02366	700	308	2.27273	R1	4-aminobutyrate aminotransferase	protein coding
CNAG_02367	637	714	0.892157	R1	GTP-binding protein ypt3	protein coding
CNAG_02368	655	273	2.39927	R1	hypothetical protein, hypothetical protein, variant	protein coding
CNAG_02371	458	180	2.54444	R1	coiled-coil domain-containing protein 130	protein coding
CNAG_02373	976	319	3.05956	R1	ATP-binding protein	protein coding
CNAG_02375	505	318	1.58805	R1	polyphosphoinositide phosphatase	protein coding
CNAG_02378	683	659	1.03642	R1	H/ACA ribonucleoprotein complex subunit 2	protein coding
CNAG_02383	553	194	2.85052	R1	trimethylguanosine synthase	protein coding
CNAG_02386	372	197	1.88832	R1	hypothetical protein	protein coding
CNAG_02393	1395	528	2.64205	R1	hypothetical protein	protein coding
CNAG_02394	606	315	1.92381	R1	hypothetical protein	protein coding
CNAG_02397	188	61	3.08197	R1	hypothetical protein	protein coding
CNAG_02398	277	172	1.61047	R1	hypothetical protein	protein coding
CNAG_02401	1106	473	2.33827	R1	G patch domain-containing protein 1	protein coding
CNAG_02404	1557	1257	1.23866	R1	nuclear segregation protein Bfr1	protein coding
CNAG_02405	78	51	1.52941	R1	hypothetical protein	protein coding
CNAG_02407	1138	355	3.20563	R1	Phospholipase D	protein coding
CNAG_02408	340	84	4.04762	R1	hypothetical protein	protein coding
CNAG_02409	383	163	2.34969	R1	hypothetical protein	protein coding
CNAG_02413	784	508	1.54331	R1	hypothetical protein, hypothetical protein, variant	protein coding
CNAG_02415	1022	356	2.87079	R1	annexin XIV	protein coding
CNAG_02418	1747	1175	1.48681	R1	asparagine-tRNA ligase	protein coding
CNAG_02422	371	202	1.83663	R1	hypothetical protein	protein coding
CNAG_02424	527	374	1.40909	R1	hypothetical protein	protein coding
CNAG_02426	2418	674	3.58754	R1	pre-mRNA-splicing factor syf1	protein coding
CNAG_02427	197	144	1.36806	R1	hypothetical protein, hypothetical protein, variant	protein coding
CNAG_02428	1264	631	2.00317	R1	GC-rich sequence DNA-binding factor	protein coding
CNAG_02431	511	300	1.70333	R1	TatD DNase	protein coding
CNAG_02433	236	261	0.904215	R1	thiol oxidase	protein coding
CNAG_02437	3227	1138	2.83568	R1	rRNA biogenesis protein RRP5	protein coding
CNAG_02439	185	85	2.17647	R1	hypothetical protein, hypothetical protein, variant	protein coding
CNAG_02443	282	310	0.909677	R1	NADH dehydrogenase	protein coding
CNAG_02447	329	203	1.62069	R1	hypothetical protein	protein coding
CNAG_02449	982	357	2.7507	R1	long-chain fatty acid CoA ligase	protein coding
CNAG_02453	1075	369	2.91328	R1	hypothetical protein	protein coding
CNAG_02458	1677	358	4.68436	R1	GTPase activating protein	protein coding
CNAG_02460	719	271	2.65314	R1	coproporphyrinogen III oxidase	protein coding
CNAG_02463	69	39	1.76923	R1	hypothetical protein	protein coding
CNAG_02466	404	120	3.36667	R1	hypothetical protein	protein coding
CNAG_02468	1115	417	2.67386	R1	AP-3 complex subunit delta-1	protein coding
CNAG_02470	367	141	2.60284	R1	phosphoric monoester hydrolase	protein coding
CNAG_02472	1124	449	2.50334	R1	endosomal P24A protein	protein coding
CNAG_02475	193	122	1.58197	R1	Flavin-containing monooxygenase	protein coding
CNAG_02482	531	254	2.09055	R1	translation machinery-associated protein 22	protein coding
CNAG_02483	24	13	1.84615	R1	hypothetical protein	protein coding
CNAG_02486	1029	707	1.45545	R1	translation initiation factor 2 subunit 2	protein coding
CNAG_02487	446	193	2.31088	R1	3-hydroxy acyl-CoA dehydratase	protein coding
CNAG_02491	643	419	1.53461	R1	nuclear protein	protein coding
CNAG_02493	308	177	1.74011	R1	hypothetical protein	protein coding
CNAG_02495	739	514	1.43774	R1	cytoplasmic protein	protein coding
CNAG_02498	1123	291	3.85911	R1	hypothetical protein	protein coding
CNAG_02501	634	295	2.14915	R1	hypothetical protein	protein coding
CNAG_02502	1530	818	1.87042	R1	ATP-dependent RNA helicase DBP3	protein coding
CNAG_02503	531	410	1.29512	R1	Glutathione peroxidase, glutathione peroxidase, variant	protein coding
CNAG_02504	263	206	1.2767	R1	hypothetical protein	protein coding
CNAG_02506	552	313	1.76358	R1	3,4-dihydroxy-2-butanone-4-phosphate synthase	protein coding
CNAG_02507	1104	745	1.48188	R1	translation initiation factor 3 subunit H	protein coding
CNAG_02517	23	38	0.605263	R1	hypothetical protein	protein coding
CNAG_02520	930	231	4.02597	R1	DNA-directed RNA polymerase III subunit RPC4	protein coding
CNAG_02524	122	81	1.50617	R1	hypothetical protein	protein coding
CNAG_02527	554	199	2.78392	R1	multidrug transporter, multidrug transporter, variant	protein coding
CNAG_02529	290	247	1.17409	R1	hypothetical protein	protein coding
CNAG_02534	728	231	3.15152	R1	tRNA 2'-phosphotransferase	protein coding
CNAG_02536	759	146	5.19863	R1	transcription initiation factor TFIID subunit 6	protein coding
CNAG_02540	673	273	2.4652	R1	hypothetical protein	protein coding
CNAG_02542	541	205	2.63902	R1	fructosamine kinase	protein coding
CNAG_02547	3210	1152	2.78646	R1	nuclear pore complex protein Nup205	protein coding
CNAG_02549	156	308	0.506494	R1	hypothetical protein	protein coding
CNAG_02551	18	67	0.268657	R1	dihydroxyacetone kinase 1	protein coding
CNAG_02554	85	102	0.833333	R1	Sugar transporter	protein coding
CNAG_02555	829	390	2.12564	R1	Putative Zn2-Cys6 zinc-finger transcription factor	protein coding
CNAG_02557	62	88	0.704545	R1	fungal specific transcription factor	protein coding
CNAG_02563	1426	332	4.29518	R1	DNA polymerase delta subunit 1	protein coding
CNAG_02565	1639	651	2.51767	R1	homoaconitase, mitochondrial	protein coding
CNAG_02568	2976	685	4.34453	R1	UBA/TS-N domain-containing protein	protein coding
CNAG_02569	620	220	2.81818	R1	hypothetical protein	protein coding
CNAG_02574	1076	351	3.06553	R1	cofactor D	protein coding
CNAG_02576	468	314	1.49045	R1	hypothetical protein	protein coding
CNAG_02577	859	339	2.53392	R1	oxidoreductase	protein coding
CNAG_02579	1951	436	4.47477	R1	ARID-containing regulator of virulence traits and carbon assimilation	protein coding
CNAG_02581	624	377	1.65517	R1	capsular associated protein	protein coding
CNAG_02583	800	415	1.92771	R1	tRNA (guanine10-N2)-methyltransferase	protein coding
CNAG_02584	340	86	3.95349	R1	serine/threonine-protein phosphatase 2A activator 1	protein coding
CNAG_02587	276	62	4.45161	R1	alfa-L-rhamnosidase	protein coding
CNAG_02588	47	42	1.11905	R1	avenacinase	protein coding
CNAG_02590	111	35	3.17143	R1	3-hydroxyisobutyrate dehydrogenase	protein coding
CNAG_02593	314	163	1.92638	R1	hypothetical protein	protein coding
CNAG_02594	86	121	0.710744	R1	hypothetical protein	protein coding
CNAG_02597	1401	714	1.96218	R1	hypothetical protein	protein coding
CNAG_02598	22	29	0.758621	R1	Chitinase	protein coding
CNAG_02600	57	94	0.606383	R1	tartrate transporter	protein coding
CNAG_02606	398	216	1.84259	R1	hypothetical protein	protein coding
CNAG_02654	1551	453	3.42384	R1	DNA polymerase epsilon catalytic subunit A	protein coding
CNAG_02655	915	492	1.85976	R1	hypothetical protein	protein coding
CNAG_02658	122	41	2.97561	R1	hypothetical protein	protein coding
CNAG_02662	944	226	4.17699	R1	cysteine protease atg4	protein coding
CNAG_02664	1370	963	1.42264	R1	D-lactate dehydrogenase	protein coding
CNAG_02670	1142	393	2.90585	R1	bud emergence protein 1	protein coding
CNAG_02671	2075	1395	1.48746	R1	pre-mRNA-splicing factor cef1	protein coding
CNAG_02672	1312	769	1.70611	R1	nonsense-mediated mRNA decay protein 3	protein coding
CNAG_02674	1157	268	4.31716	R1	hypothetical protein	protein coding
CNAG_02675	2175	762	2.85433	R1	CAMK/CAMKL/GIN4 protein kinase	protein coding
CNAG_02678	227	320	0.709375	R1	hypothetical protein	protein coding
CNAG_02680	908	315	2.88254	R1	VPS15 protein kinase	protein coding
CNAG_02681	101	94	1.07447	R1	Phytase	protein coding
CNAG_02683	487	244	1.9959	R1	hypothetical protein	protein coding
CNAG_02685	84	61	1.37705	R1	hypothetical protein	protein coding
CNAG_02686	1819	838	2.17064	R1	Cystathionine beta-lyase	protein coding
CNAG_02688	199	77	2.58442	R1	hypothetical protein	protein coding
CNAG_02692	600	518	1.1583	R1	nitroreductase	protein coding
CNAG_02694	27	51	0.529412	R1	hypothetical protein, hypothetical protein, variant	protein coding
CNAG_02696	1220	477	2.55765	R1	exocyst protein	protein coding
CNAG_02697	50	62	0.806452	R1	hypothetical protein	protein coding
CNAG_02698	1450	496	2.92339	R1	hypothetical protein	protein coding
CNAG_02700	1206	525	2.29714	R1	C2H2 type zinc finger transcription factor	protein coding
CNAG_02701	721	372	1.93817	R1	hypothetical protein	protein coding
CNAG_02703	1576	697	2.26112	R1	hypothetical protein, hypothetical protein, variant	protein coding
CNAG_02705	61	57	1.07018	R1	hypothetical protein, hypothetical protein, variant 1, hypothetical protein, variant 2	protein coding
CNAG_02708	188	89	2.11236	R1	prenylcysteine oxidase/farnesylcysteine lyase	protein coding
CNAG_02710	1567	1177	1.33135	R1	T-complex protein 1 subunit gamma	protein coding
CNAG_02711	37	70	0.528571	R1	hypothetical protein	protein coding
CNAG_02712	689	459	1.50109	R1	BUD32 protein kinase	protein coding
CNAG_02714	774	868	0.891705	R1	elongation factor 1-beta	protein coding
CNAG_02717	629	313	2.00958	R1	aryl-alcohol dehydrogenase	protein coding
CNAG_02721	2035	405	5.02469	R1	leucine repeat containing protein	protein coding
CNAG_02723	758	359	2.11142	R1	hypothetical protein	protein coding
CNAG_02724	778	266	2.92481	R1	hypothetical protein	protein coding
CNAG_02726	888	552	1.6087	R1	cytoplasmic protein	protein coding
CNAG_02728	241	72	3.34722	R1	peroxin-13	protein coding
CNAG_02729	332	108	3.07407	R1	hypothetical protein	protein coding
CNAG_02736	1488	1244	1.19614	R1	T-complex protein 1 subunit theta	protein coding
CNAG_02739	806	484	1.66529	R1	hypothetical protein	protein coding
CNAG_02740	533	143	3.72727	R1	hypothetical protein	protein coding
CNAG_02742	617	376	1.64096	R1	dicer-like protein 1	protein coding
CNAG_02744	435	422	1.03081	R1	hypothetical protein	protein coding
CNAG_02745	1964	719	2.73157	R1	dicer-like protein 2	protein coding
CNAG_02750	172	135	1.27407	R1	hypothetical protein, hypothetical protein, variant 1, hypothetical protein, variant 2	protein coding
CNAG_02751	354	225	1.57333	R1	Short-chain dehydrogenase	protein coding
CNAG_02752	660	219	3.0137	R1	Short-chain dehydrogenase	protein coding
CNAG_02754	550	707	0.777935	R1	small subunit ribosomal protein S12e	protein coding
CNAG_02756	281	60	4.68333	R1	geranylgeranyl transferase type-1 subunit beta, geranylgeranyl transferase type-1 subunit beta, variant	protein coding
CNAG_02759	163	53	3.07547	R1	hypothetical protein	protein coding
CNAG_02760	955	425	2.24706	R1	hypothetical protein	protein coding
CNAG_02762	508	545	0.93211	R1	F-type H -transporting ATPase subunit G	protein coding
CNAG_02763	1707	710	2.40423	R1	phenylalanine-tRNA ligase, beta subunit	protein coding
CNAG_02766	897	167	5.37126	R1	hypothetical protein	protein coding
CNAG_02768	157	58	2.7069	R1	hypothetical protein	protein coding
CNAG_02770	386	291	1.32646	R1	transcription initiation factor TFIID subunit 11	protein coding
CNAG_02771	795	328	2.42378	R1	DNA repair and recombination protein RAD54B	protein coding
CNAG_02773	2034	840	2.42143	R1	exosome complex exonuclease Rrp6	protein coding
CNAG_02774	483	260	1.85769	R1	Fungal Zn(2)-Cys(6) binuclear cluster domain protein	protein coding
CNAG_02775	774	840	0.921429	R1	hypothetical protein	protein coding
CNAG_02777	553	326	1.69632	R1	phosphate:H symporter, phosphate:H symporter, variant	protein coding
CNAG_02780	1033	604	1.71026	R1	Kynureninase	protein coding
CNAG_02783	457	313	1.46006	R1	hypothetical protein	protein coding
CNAG_02784	334	195	1.71282	R1	Methyltransferase	protein coding
CNAG_02787	516	223	2.3139	R1	dephospho-CoA kinase	protein coding
CNAG_02789	549	301	1.82392	R1	nitrogen permease regulator 2	protein coding
CNAG_02792	708	435	1.62759	R1	mitochondrial chaperone BCS1	protein coding
CNAG_02793	1072	435	2.46437	R1	kynurenine 3-monooxygenase	protein coding
CNAG_02795	613	328	1.8689	R1	Phosphoribosylglycinamide formyltransferase	protein coding
CNAG_02797	391	224	1.74554	R1	putative secreted protein	protein coding
CNAG_02798	567	267	2.1236	R1	hypothetical protein	protein coding
CNAG_02801	447	465	0.96129	R1	thioredoxin, thioredoxin, variant	protein coding
CNAG_02803	320	290	1.10345	R1	hypothetical protein	protein coding
CNAG_02805	21	11	1.90909	R1	Putative beta-type carbonic anhydrase	protein coding
CNAG_02809	983	381	2.58005	R1	tRNA-specific adenosine deaminase 3	protein coding
CNAG_02813	345	300	1.15	R1	large subunit ribosomal protein L30	protein coding
CNAG_02815	1031	905	1.13923	R1	glycerol-3-phosphate dehydrogenase	protein coding
CNAG_02817	650	560	1.16071	R1	GTP-binding protein ypt2	protein coding
CNAG_02819	241	215	1.12093	R1	vacuolar membrane protein	protein coding
CNAG_02820	722	176	4.10227	R1	serine/threonine protein kinase	protein coding
CNAG_02824	814	394	2.06599	R1	hypothetical protein	protein coding
CNAG_02825	1319	976	1.35143	R1	Argininosuccinate lyase	protein coding
CNAG_02828	57	35	1.62857	R1	hypothetical protein	protein coding
CNAG_02833	321	328	0.978659	R1	NADH dehydrogenase (ubiquinone) 1 beta subcomplex 7	protein coding
CNAG_02838	474	355	1.33521	R1	small subunit ribosomal protein S17	protein coding
CNAG_02841	119	164	0.72561	R1	cytochrome P450 monooxygenase pc-2, cytochrome P450 monooxygenase pc-2, variant	protein coding
CNAG_02845	649	506	1.28261	R1	hypothetical protein	protein coding
CNAG_02848	19	49	0.387755	R1	hypothetical protein	protein coding
CNAG_02850	1640	1347	1.21752	R1	glucan endo-1,3-alpha-glucosidase agn1	protein coding
CNAG_02851	1061	896	1.18415	R1	Threonine aldolase	protein coding
CNAG_02852	1358	745	1.82282	R1	4-aminobutyrate transaminase	protein coding
CNAG_02854	568	440	1.29091	R1	peroxiredoxin Q/BCP	protein coding
CNAG_02855	773	535	1.44486	R1	oligosaccharyltransferase complex subunit delta (ribophorin II)	protein coding
CNAG_02856	644	644	1	R1	potassium ion transporter	protein coding
CNAG_02859	540	117	4.61538	R1	NADH kinase, NADH kinase, variant 1, NADH kinase, variant 2, NADH kinase, variant 3	protein coding
CNAG_02860	1022	822	1.24331	R1	endo-1,3(4)-beta-glucanase	protein coding
CNAG_02861	500	154	3.24675	R1	histidinol-phosphatase (PHP family)	protein coding
CNAG_02867	621	860	0.722093	R1	phosphatidylinositol phospholipase C, delta	protein coding
CNAG_02870	847	324	2.6142	R1	folylpolyglutamate synthase	protein coding
CNAG_02871	243	131	1.85496	R1	GPI mannosyltransferase 2	protein coding
CNAG_02874	1159	256	4.52734	R1	hypothetical protein	protein coding
CNAG_02877	594	163	3.64417	R1	hypothetical protein	protein coding
CNAG_02878	605	403	1.50124	R1	hypothetical protein	protein coding
CNAG_02881	449	285	1.57544	R1	Cytidine deaminase	protein coding
CNAG_02883	496	202	2.45545	R1	Ras-like GTP-binding protein, putative	protein coding
CNAG_02885	834	601	1.38769	R1	capsular associated protein	protein coding
CNAG_02889	111	52	2.13462	R1	hypothetical protein	protein coding
CNAG_02891	478	338	1.4142	R1	endoplasmic reticulum protein	protein coding
CNAG_02893	341	99	3.44444	R1	hypothetical protein, hypothetical protein, variant	protein coding
CNAG_02895	1199	456	2.62939	R1	dynamin GTPase	protein coding
CNAG_02896	1324	494	2.68016	R1	hydroxymethylglutaryl-CoA synthase	protein coding
CNAG_02897	900	261	3.44828	R1	inositol hexaphosphate kinase 1	protein coding
CNAG_02902	147	100	1.47	R1	hypothetical protein	protein coding
CNAG_02905	439	397	1.10579	R1	hypothetical protein	protein coding
CNAG_02907	731	398	1.83668	R1	tRNA (guanine-N(1)-)-methyltransferase	protein coding
CNAG_02910	646	428	1.50935	R1	hypothetical protein	protein coding
CNAG_02912	1607	552	2.91123	R1	hypothetical protein	protein coding
CNAG_02915	1189	515	2.30874	R1	AGC/PDK1 protein kinase	protein coding
CNAG_02917	930	703	1.3229	R1	hypothetical protein	protein coding
CNAG_02918	1118	586	1.90785	R1	Acetyl-CoA C-acetyltransferase	protein coding
CNAG_02919	226	90	2.51111	R1	hypothetical protein	protein coding
CNAG_02923	437	438	0.997717	R1	large subunit ribosomal protein L14	protein coding
CNAG_02924	318	110	2.89091	R1	histone H1/5	protein coding
CNAG_02925	988	824	1.19903	R1	D-arabinitol 2-dehydrogenase	protein coding
CNAG_02928	1009	1016	0.99311	R1	large subunit ribosomal protein L5e	protein coding
CNAG_02929	972	571	1.70228	R1	transcription initiation factor TFIID subunit 1	protein coding
CNAG_02930	910	268	3.39552	R1	virulence related protein of unknown function	protein coding
CNAG_02932	195	97	2.01031	R1	hypothetical protein	protein coding
CNAG_02933	544	157	3.46497	R1	quinone oxidoreductase	protein coding
CNAG_02934	15	11	1.36364	R1	hypothetical protein, hypothetical protein, variant	protein coding
CNAG_02935	507	197	2.5736	R1	malonic semialdehyde reductase	protein coding
CNAG_02938	410	424	0.966981	R1	cytochrome c oxidase subunit 6a	protein coding
CNAG_02941	364	215	1.69302	R1	hypothetical protein, hypothetical protein, variant	protein coding
CNAG_02942	517	324	1.59568	R1	hypothetical protein	protein coding
CNAG_02943	1685	1125	1.49778	R1	cytoplasmic protein, cytoplasmic protein, variant	protein coding
CNAG_02944	66	13	5.07692	R1	phosphate-repressible vacuolar acid phosphatase	protein coding
CNAG_02950	624	331	1.8852	R1	Grx4 family monothiol glutaredoxin	protein coding
CNAG_02952	324	295	1.09831	R1	hypothetical protein	protein coding
CNAG_02955	373	153	2.43791	R1	hypothetical protein	protein coding
CNAG_02959	31	59	0.525424	R1	high-affinity iron transporter	protein coding
CNAG_02963	597	227	2.62996	R1	anaphase-promoting complex subunit 8	protein coding
CNAG_02966	17	14	1.21429	R1	carboxypeptidase	protein coding
CNAG_02967	453	218	2.07798	R1	hypothetical protein	protein coding
CNAG_02969	219	102	2.14706	R1	thioesterase, thioesterase, variant	protein coding
CNAG_02975	496	336	1.47619	R1	hypothetical protein	protein coding
CNAG_02977	1267	696	1.8204	R1	metal resistance protein YCF1	protein coding
CNAG_02978	97	34	2.85294	R1	hypothetical protein	protein coding
CNAG_02980	233	152	1.53289	R1	membrane dipeptidase	protein coding
CNAG_02982	1638	617	2.65478	R1	U3 small nucleolar RNA-associated protein 13	protein coding
CNAG_02985	698	471	1.48195	R1	nuclear mRNA splicing protein	protein coding
CNAG_02986	540	293	1.843	R1	ADP-ribose pyrophosphatase	protein coding
CNAG_02994	2127	856	2.48481	R1	hypothetical protein, hypothetical protein, variant	protein coding
CNAG_02996	223	93	2.39785	R1	flavoprotein oxygenase, flavoprotein oxygenase, variant 1, flavoprotein oxygenase, variant 2	protein coding
CNAG_02997	1131	296	3.82095	R1	protein STU1	protein coding
CNAG_02999	267	250	1.068	R1	hypothetical protein	protein coding
CNAG_03001	1610	640	2.51562	R1	multiple RNA-binding domain-containing protein 1	protein coding
CNAG_03004	541	470	1.15106	R1	riboflavin synthase, alpha subunit	protein coding
CNAG_03006	271	56	4.83929	R1	hypothetical protein	protein coding
CNAG_03007	385	394	0.977157	R1	hypothetical protein	protein coding
CNAG_03009	335	212	1.58019	R1	putative ER membrane protein	protein coding
CNAG_03012	306	386	0.792746	R1	quorum sensing-like molecule	protein coding
CNAG_03014	196	109	1.79817	R1	dolichyldiphosphatase, dolichyldiphosphatase, variant	protein coding
CNAG_03015	365	483	0.755694	R1	large subunit ribosomal protein L37-A	protein coding
CNAG_03017	1193	507	2.35306	R1	transcription initiation factor TFIIF subunit alpha	protein coding
CNAG_03018	443	197	2.24873	R1	Putative zinc finger transcription factor	protein coding
CNAG_03023	1694	396	4.27778	R1	hypothetical protein	protein coding
CNAG_03026	474	192	2.46875	R1	N-acetylglucosaminylphosphatidylinositol deacetylase	protein coding
CNAG_03028	243	117	2.07692	R1	hypothetical protein	protein coding
CNAG_03032	773	425	1.81882	R1	dynactin 2, dynactin 2, variant	protein coding
CNAG_03034	478	153	3.12418	R1	RNA exonuclease 1	protein coding
CNAG_03036	169	268	0.630597	R1	potassium ion transporter, potassium ion transporter, variant	protein coding
CNAG_03038	699	911	0.767289	R1	hypothetical protein	protein coding
CNAG_03040	1586	585	2.71111	R1	transketolase, transketolase, variant	protein coding
CNAG_03044	389	220	1.76818	R1	hypothetical protein, hypothetical protein, variant	protein coding
CNAG_03049	367	352	1.04261	R1	hypothetical protein	protein coding
CNAG_03051	245	81	3.02469	R1	polyamine transporter	protein coding
CNAG_03053	576	665	0.866165	R1	large subunit ribosomal protein L23	protein coding
CNAG_03055	381	440	0.865909	R1	bud site selection protein 20	protein coding
CNAG_03056	63	14	4.5	R1	hypothetical protein	protein coding
CNAG_03057	690	151	4.56954	R1	hypothetical protein	protein coding
CNAG_03059	210	187	1.12299	R1	hypothetical protein	protein coding
CNAG_03060	304	96	3.16667	R1	multiple drug resistance protein	protein coding
CNAG_03061	1090	398	2.73869	R1	multiple drug resistance protein	protein coding
CNAG_03063	928	713	1.30154	R1	hypothetical protein, hypothetical protein, variant	protein coding
CNAG_03065	471	690	0.682609	R1	ER-derived vesicles protein ERV14	protein coding
CNAG_03067	183	66	2.77273	R1	hydroxymethylglutaryl-CoA lyase	protein coding
CNAG_03069	348	279	1.24731	R1	hydrolase	protein coding
CNAG_03070	752	295	2.54915	R1	compass component swd2	protein coding
CNAG_03071	212	192	1.10417	R1	hypothetical protein	protein coding
CNAG_03072	1443	1362	1.05947	R1	enolase	protein coding
CNAG_03075	697	244	2.85656	R1	DNA polymerase delta subunit 3	protein coding
CNAG_03079	265	100	2.65	R1	Protein processing in the ER protein 1, putative	protein coding
CNAG_03081	1227	530	2.31509	R1	ATP-dependent RNA helicase MRH4, mitochondrial	protein coding
CNAG_03084	262	111	2.36036	R1	endoribonuclease L-PSP	protein coding
CNAG_03090	70	70	1	R1	hypothetical protein	protein coding
CNAG_03092	456	275	1.65818	R1	hypothetical protein	protein coding
CNAG_03095	98	27	3.62963	R1	hypothetical protein	protein coding
CNAG_03096	520	320	1.625	R1	UDP-glucose 4-epimerase	protein coding
CNAG_03099	603	441	1.36735	R1	chitin synthase 1	protein coding
CNAG_03101	29	63	0.460317	R1	efflux protein EncT	protein coding
CNAG_03102	367	131	2.80153	R1	hypothetical protein	protein coding
CNAG_03104	387	217	1.78341	R1	hypothetical protein	protein coding
CNAG_03106	993	582	1.70619	R1	hypothetical protein	protein coding
CNAG_03108	443	254	1.74409	R1	hypothetical protein	protein coding
CNAG_03113	1220	217	5.62212	R1	trehalose synthase	protein coding
CNAG_03117	1117	252	4.43254	R1	hypothetical protein	protein coding
CNAG_03119	318	122	2.60656	R1	hypothetical protein	protein coding
CNAG_03120	4228	1903	2.22176	R1	alpha-1,3-glucan synthase, alpha-1,3-glucan synthase, variant	protein coding
CNAG_03122	69	101	0.683168	R1	hypothetical protein	protein coding
CNAG_03124	1684	899	1.87319	R1	periodic tryptophan protein 2	protein coding
CNAG_03126	225	145	1.55172	R1	hypothetical protein	protein coding
CNAG_03129	651	509	1.27898	R1	transcription factor IIIA	protein coding
CNAG_03133	113	68	1.66176	R1	UDP-glucose,sterol transferase	protein coding
CNAG_03134	214	96	2.22917	R1	3-hydroxybutyryl-CoA dehydrogenase	protein coding
CNAG_03136	815	659	1.23672	R1	hypothetical protein	protein coding
CNAG_03137	58	113	0.513274	R1	CMGC/CDK protein kinase	protein coding
CNAG_03138	830	288	2.88194	R1	ubiquitin-protein ligase	protein coding
CNAG_03140	227	938	0.242004	R1	Sugar transporter	protein coding
CNAG_03141	75	27	2.77778	R1	hypothetical protein, hypothetical protein, variant	protein coding
CNAG_03142	493	526	0.937262	R1	hypothetical protein	protein coding
CNAG_03144	632	361	1.75069	R1	peptide-methionine (S)-S-oxide reductase	protein coding
CNAG_03145	12	47	0.255319	R1	hypothetical protein	protein coding
CNAG_03147	652	314	2.07643	R1	rhomboid-like protein	protein coding
CNAG_03149	739	328	2.25305	R1	BRCA1-associated protein	protein coding
CNAG_03150	580	375	1.54667	R1	solute carrier family 25 (mitochondrial folate transporter), member 32	protein coding
CNAG_03152	798	237	3.36709	R1	calcium-binding protein	protein coding
CNAG_03154	294	141	2.08511	R1	hypothetical protein, hypothetical protein, variant	protein coding
CNAG_03156	436	175	2.49143	R1	hypothetical protein	protein coding
CNAG_03157	1092	326	3.34969	R1	hypothetical protein	protein coding
CNAG_03159	548	410	1.33659	R1	cytoplasmic protein	protein coding
CNAG_03162	467	226	2.06637	R1	vacuolar protein	protein coding
CNAG_03165	436	437	0.997712	R1	hypothetical protein	protein coding
CNAG_03166	222	80	2.775	R1	hypothetical protein	protein coding
CNAG_03168	2773	908	3.05396	R1	sulfite reductase (NADPH) flavoprotein alpha- component	protein coding
CNAG_03171	1306	523	2.49713	R1	WEE protein kinase	protein coding
CNAG_03172	401	122	3.28689	R1	hypothetical protein	protein coding
CNAG_03174	250	175	1.42857	R1	4'-phosphopantetheinyl transferase	protein coding
CNAG_03176	654	509	1.28487	R1	endoplasmic oxidoreductin 1	protein coding
CNAG_03177	365	338	1.07988	R1	hypothetical protein, hypothetical protein, variant	protein coding
CNAG_03183	1172	478	2.45188	R1	nuclear protein	protein coding
CNAG_03188	1414	598	2.36455	R1	histone-lysine N-methyltransferase, H3 lysine-36 specific	protein coding
CNAG_03189	639	440	1.45227	R1	DIL and Ankyrin domain-containing protein	protein coding
CNAG_03191	761	326	2.33436	R1	hypothetical protein	protein coding
CNAG_03195	44	57	0.77193	R1	hypothetical protein	protein coding
CNAG_03199	44	15	2.93333	R1	FAD dependent oxidoreductase	protein coding
CNAG_03202	1457	625	2.3312	R1	Adenylate cyclase	protein coding
CNAG_03205	1240	512	2.42188	R1	ATP-dependent RNA helicase ROK1	protein coding
CNAG_03212	758	212	3.57547	R1	forkhead domain-containing protein	protein coding
CNAG_03213	315	189	1.66667	R1	UV damage endonuclease UvdE, UV damage endonuclease UvdE, variant	protein coding
CNAG_03214	111	112	0.991071	R1	tRNA (uracil-O(2)-)-methyltransferase	protein coding
CNAG_03216	456	136	3.35294	R1	CAMK protein kinase	protein coding
CNAG_03217	826	314	2.63057	R1	hypothetical protein	protein coding
CNAG_03221	287	429	0.668998	R1	large subunit ribosomal protein L29	protein coding
CNAG_03223	729	762	0.956693	R1	hypothetical protein	protein coding
CNAG_03225	1069	970	1.10206	R1	malate dehydrogenase, NAD-dependent	protein coding
CNAG_03226	892	704	1.26705	R1	succinate dehydrogenase [ubiquinone] iron-sulfur subunit, mitochondrial	protein coding
CNAG_03227	140	108	1.2963	R1	hypothetical protein	protein coding
CNAG_03230	80	43	1.86047	R1	yippee-like, putative	protein coding
CNAG_03233	36	41	0.878049	R1	yippee-like, putative	protein coding
CNAG_03235	1223	457	2.67615	R1	THO complex subunit 1	protein coding
CNAG_03236	329	115	2.86087	R1	AMME syndrome candidate protein	protein coding
CNAG_03238	25	13	1.92308	R1	dioxygenase subfamily protein	protein coding
CNAG_03240	819	731	1.12038	R1	Mannosyl-oligosaccharide 1,2-alpha-mannosidase	protein coding
CNAG_03241	603	188	3.20745	R1	hypothetical protein	protein coding
CNAG_03245	1506	1123	1.34105	R1	glucose-6-phosphate dehydrogenase	protein coding
CNAG_03246	834	397	2.10076	R1	18S rRNA biogenesis protein RCL1	protein coding
CNAG_03250	450	203	2.21675	R1	hypothetical protein	protein coding
CNAG_03258	608	405	1.50123	R1	AGC protein kinase, AGC protein kinase, variant 1, AGC protein kinase, variant 2	protein coding
CNAG_03260	659	367	1.79564	R1	large subunit ribosomal protein L6	protein coding
CNAG_03262	548	451	1.21508	R1	myo-inositol-1(or 4)-monophosphatase	protein coding
CNAG_03264	708	354	2	R1	hypothetical protein	protein coding
CNAG_03266	932	510	1.82745	R1	malate dehydrogenase, NAD-dependent	protein coding
CNAG_03267	1459	725	2.01241	R1	splicing factor 3B subunit 2	protein coding
CNAG_03268	346	511	0.677104	R1	hypothetical protein	protein coding
CNAG_03269	396	307	1.2899	R1	Aldehyde dehydrogenase	protein coding
CNAG_03271	1169	575	2.03304	R1	pre-mRNA-splicing factor prp46	protein coding
CNAG_03273	1573	379	4.1504	R1	transcription initiation factor TFIID subunit 2	protein coding
CNAG_03275	660	234	2.82051	R1	glutaryl-CoA dehydrogenase, glutaryl-CoA dehydrogenase, variant	protein coding
CNAG_03279	247	91	2.71429	R1	hypothetical protein	protein coding
CNAG_03281	793	867	0.914648	R1	glycine-rich RNA binding protein, glycine-rich RNA binding protein, variant 1, glycine-rich RNA binding protein, variant 2	protein coding
CNAG_03284	869	509	1.70727	R1	rRNA biogenesis protein RRP36	protein coding
CNAG_03286	524	284	1.84507	R1	hypothetical protein	protein coding
CNAG_03288	468	328	1.42683	R1	membrane protein	protein coding
CNAG_03290	667	213	3.13146	R1	ste/ste20/ysk protein kinase	protein coding
CNAG_03291	597	224	2.66518	R1	hypothetical protein	protein coding
CNAG_03297	1027	454	2.26211	R1	histone acetyltransferase type B subunit 2	protein coding
CNAG_03298	334	363	0.92011	R1	hypothetical protein	protein coding
CNAG_03301	389	363	1.07163	R1	mitochondrial import inner membrane translocase subunit TIM13	protein coding
CNAG_03304	410	140	2.92857	R1	hypothetical protein	protein coding
CNAG_03305	587	160	3.66875	R1	calcium binding protein 39	protein coding
CNAG_03308	1103	416	2.65144	R1	hypothetical protein	protein coding
CNAG_03309	503	304	1.65461	R1	pre-mRNA-splicing factor CWC21	protein coding
CNAG_03311	1453	966	1.50414	R1	hydroxymethylglutaryl-CoA synthase	protein coding
CNAG_03312	353	208	1.69712	R1	hypothetical protein	protein coding
CNAG_03314	1148	275	4.17455	R1	YTH domain family 2, YTH domain family 2, variant	protein coding
CNAG_03315	646	736	0.877717	R1	GTP-binding protein rhoA	protein coding
CNAG_03318	49	19	2.57895	R1	hypothetical protein	protein coding
CNAG_03319	2023	619	3.26817	R1	phospholipid binding protein	protein coding
CNAG_03321	996	381	2.61417	R1	vacuolar protein sorting-associated protein 9	protein coding
CNAG_03322	1237	829	1.49216	R1	UDP-glucuronate decarboxylase	protein coding
CNAG_03324	915	388	2.35825	R1	hypothetical protein	protein coding
CNAG_03326	359	177	2.02825	R1	Chitin synthase	protein coding
CNAG_03328	812	306	2.65359	R1	hypothetical protein	protein coding
CNAG_03330	205	88	2.32955	R1	RecQ-mediated genome instability protein 1	protein coding
CNAG_03332	753	410	1.83659	R1	replication factor C subunit 2/4	protein coding
CNAG_03333	1467	437	3.35698	R1	cytoplasmic protein	protein coding
CNAG_03337	329	354	0.929379	R1	hypothetical protein	protein coding
CNAG_03339	13	69	0.188406	R1	biotin transporter, biotin transporter, variant	protein coding
CNAG_03341	1747	426	4.10094	R1	minichromosome maintenance protein 2	protein coding
CNAG_03343	614	281	2.18505	R1	hypothetical protein	protein coding
CNAG_03345	2349	951	2.47003	R1	putative translational repressor	protein coding
CNAG_03346	81	29	2.7931	R1	bZip transcription factor, putative	protein coding
CNAG_03347	1580	694	2.27666	R1	ATP-dependent Clp protease ATP-binding subunit ClpB	protein coding
CNAG_03348	995	296	3.36149	R1	hypothetical protein	protein coding
CNAG_03349	1528	685	2.23066	R1	pre-mRNA-processing factor 17	protein coding
CNAG_03352	294	309	0.951456	R1	hypothetical protein	protein coding
CNAG_03356	573	288	1.98958	R1	hypothetical protein	protein coding
CNAG_03357	906	283	3.20141	R1	hypothetical protein	protein coding
CNAG_03358	1327	1326	1.00075	R1	Phosphoglycerate kinase	protein coding
CNAG_03362	909	322	2.82298	R1	hypothetical protein	protein coding
CNAG_03364	484	202	2.39604	R1	hypothetical protein	protein coding
CNAG_03367	809	482	1.67842	R1	Uridine kinase	protein coding
CNAG_03370	603	652	0.924847	R1	calcium-binding protein NCS-1	protein coding
CNAG_03372	1377	423	3.25532	R1	vacuolar protein-sorting protein bro1	protein coding
CNAG_03374	256	126	2.03175	R1	DNA replication complex GINS protein PSF1	protein coding
CNAG_03376	599	202	2.96535	R1	cytoplasmic protein, cytoplasmic protein, variant	protein coding
CNAG_03377	386	246	1.56911	R1	hypothetical protein	protein coding
CNAG_03379	493	238	2.07143	R1	N-acetyltransferase 5	protein coding
CNAG_03381	120	52	2.30769	R1	hypothetical protein	protein coding
CNAG_03382	432	232	1.86207	R1	hypothetical protein	protein coding
CNAG_03387	129	394	0.327411	R1	hypothetical protein	protein coding
CNAG_03388	1030	404	2.5495	R1	nuclear protein	protein coding
CNAG_03391	708	293	2.41638	R1	mitochondrial inner membrane protein	protein coding
CNAG_03393	369	91	4.05495	R1	acyl-CoA thioesterase II	protein coding
CNAG_03394	363	150	2.42	R1	hypothetical protein	protein coding
CNAG_03399	1846	843	2.1898	R1	SIT4-associating protein/190	protein coding
CNAG_03400	123	116	1.06034	R1	oxidoreductase	protein coding
CNAG_03402	669	260	2.57308	R1	hypothetical protein	protein coding
CNAG_03403	586	247	2.37247	R1	mitochondrial protein	protein coding
CNAG_03405	692	448	1.54464	R1	hypothetical protein	protein coding
CNAG_03409	1456	499	2.91784	R1	osomolarity two-component system, response regulator SKN7	protein coding
CNAG_03411	331	299	1.10702	R1	hypothetical protein	protein coding
CNAG_03412	492	171	2.87719	R1	Chitinase	protein coding
CNAG_03416	426	333	1.27928	R1	hypothetical protein	protein coding
CNAG_03418	2678	974	2.74949	R1	exportin-1	protein coding
CNAG_03421	43	41	1.04878	R1	hypothetical protein	protein coding
CNAG_03423	1086	281	3.86477	R1	transcriptional activator	protein coding
CNAG_03426	732	299	2.44816	R1	GDP-mannose transporter 2	protein coding
CNAG_03427	33	95	0.347368	R1	aconitate hydratase, mitochondrial, aconitate hydratase, mitochondrial, variant	protein coding
CNAG_03433	427	438	0.974886	R1	endo alpha-1,4 polygalactosaminidase precursor	protein coding
CNAG_03434	626	521	1.20154	R1	solute carrier family 45, member 1/2/4	protein coding
CNAG_03436	997	404	2.46782	R1	Alanine transaminase, alanine transaminase, variant	protein coding
CNAG_03437	192	150	1.28	R1	hypothetical protein	protein coding
CNAG_03438	1727	1508	1.14523	R1	hexose transporter	protein coding
CNAG_03439	641	766	0.836815	R1	hypothetical protein	protein coding
CNAG_03441	525	354	1.48305	R1	small subunit ribosomal protein S21	protein coding
CNAG_03444	283	281	1.00712	R1	hypothetical protein	protein coding
CNAG_03448	1018	317	3.21136	R1	translation initiation factor eIF-2B subunit delta	protein coding
CNAG_03451	731	239	3.05858	R1	hypothetical protein	protein coding
CNAG_03452	642	411	1.56204	R1	AFG1 family mitochondrial ATPase	protein coding
CNAG_03456	609	436	1.39679	R1	hypothetical protein	protein coding
CNAG_03457	1903	1026	1.85478	R1	arginine-tRNA ligase	protein coding
CNAG_03458	510	306	1.66667	R1	hypothetical protein	protein coding
CNAG_03461	108	52	2.07692	R1	hypothetical protein, hypothetical protein, variant	protein coding
CNAG_03466	1214	318	3.81761	R1	RNA-dependent RNA polymerase 1	protein coding
CNAG_03474	13	32	0.40625	R1	efflux protein EncT	protein coding
CNAG_03475	964	290	3.32414	R1	hypothetical protein	protein coding
CNAG_03476	2229	1577	1.41344	R1	Spermidine synthase	protein coding
CNAG_03477	225	247	0.910931	R1	hypothetical protein	protein coding
CNAG_03479	1835	557	3.29443	R1	hypothetical protein	protein coding
CNAG_03480	107	69	1.55072	R1	NAD epimerase domain-containing protein	protein coding
CNAG_03483	517	371	1.39353	R1	protein GET1	protein coding
CNAG_03485	1459	477	3.0587	R1	polyamine transporter 1	protein coding
CNAG_03486	716	626	1.14377	R1	peptidyl-prolyl cis-trans isomerase B	protein coding
CNAG_03488	197	243	0.8107	R1	Required for Rim101 Activation 1	protein coding
CNAG_03494	1164	485	2.4	R1	hypothetical protein	protein coding
CNAG_03497	496	481	1.03119	R1	BET3 family protein	protein coding
CNAG_03499	309	250	1.236	R1	twin-arginine translocation pathway signal peptide	protein coding
CNAG_03500	1168	154	7.58442	R1	osmosensor	protein coding
CNAG_03503	830	283	2.93286	R1	ATP-binding cassette transporter protein YOR1, ATP-binding cassette transporter protein YOR1, variant	protein coding
CNAG_03507	1143	1023	1.1173	R1	mitochondrial-processing peptidase subunit beta	protein coding
CNAG_03509	942	755	1.24768	R1	pyruvate dehydrogenase X component	protein coding
CNAG_03511	131	37	3.54054	R1	hypothetical protein	protein coding
CNAG_03513	859	359	2.39276	R1	ribosomal RNA-processing protein 7	protein coding
CNAG_03516	834	424	1.96698	R1	hypothetical protein	protein coding
CNAG_03517	1091	809	1.34858	R1	NADH dehydrogenase	protein coding
CNAG_03518	14	18	0.777778	R1	Phenylacrylic acid decarboxylase	protein coding
CNAG_03520	509	166	3.06627	R1	hypothetical protein	protein coding
CNAG_03522	227	109	2.08257	R1	hypothetical protein	protein coding
CNAG_03524	688	326	2.11043	R1	transmembrane receptor	protein coding
CNAG_03525	221	158	1.39873	R1	alpha,alpha-trehalase	protein coding
CNAG_03527	1432	298	4.80537	R1	cytoplasmic protein	protein coding
CNAG_03538	71	246	0.288618	R1	hypothetical protein	protein coding
CNAG_03540	534	275	1.94182	R1	aspartyl/glutamyl-tRNA(Asn/Gln) amidotransferase, B subunit	protein coding
CNAG_03541	668	349	1.91404	R1	hypothetical protein	protein coding
CNAG_03542	961	653	1.47167	R1	Arginase	protein coding
CNAG_03552	140	163	0.858896	R1	hypothetical protein	protein coding
CNAG_03555	215	90	2.38889	R1	acylglycerone-phosphate reductase	protein coding
CNAG_03557	326	247	1.31984	R1	transcription initiation factor TFIIA small subunit	protein coding
CNAG_03559	103	125	0.824	R1	allantoate permease	protein coding
CNAG_03561	576	378	1.52381	R1	hypothetical protein	protein coding
CNAG_03563	1310	393	3.33333	R1	aspartate-tRNA(Asn) ligase	protein coding
CNAG_03577	1043	1122	0.92959	R1	large subunit ribosomal protein LP0	protein coding
CNAG_03583	657	334	1.96707	R1	hypothetical protein	protein coding
CNAG_03587	709	235	3.01702	R1	hypothetical protein	protein coding
CNAG_03588	3527	1353	2.6068	R1	L-aminoadipate-semialdehyde dehydrogenase	protein coding
CNAG_03589	589	434	1.35714	R1	adrenodoxin-type ferredoxin	protein coding
CNAG_03590	716	652	1.09816	R1	casein kinase II subunit beta	protein coding
CNAG_03592	1170	539	2.17069	R1	phosphomethylpyrimidine kinase	protein coding
CNAG_03595	765	947	0.807814	R1	hypothetical protein	protein coding
CNAG_03596	1332	1091	1.2209	R1	2-oxoglutarate dehydrogenase E2 component (dihydrolipoamide succinyltransferase)	protein coding
CNAG_03597	23	25	0.92	R1	hypothetical protein, hypothetical protein, variant	protein coding
CNAG_03599	646	132	4.89394	R1	mandelate racemase/muconate lactonizing enzyme	protein coding
CNAG_03602	1895	1740	1.08908	R1	U3 small nucleolar RNA-associated protein 5	protein coding
CNAG_03604	745	235	3.17021	R1	mRNA 3'-end-processing protein yth1	protein coding
CNAG_03605	578	265	2.18113	R1	hypothetical protein	protein coding
CNAG_03607	524	107	4.8972	R1	hypothetical protein	protein coding
CNAG_03609	445	163	2.73006	R1	hypothetical protein	protein coding
CNAG_03619	314	152	2.06579	R1	solute carrier family 29 (equilibrative nucleoside transporter), member 1/2/3	protein coding
CNAG_03621	616	712	0.865169	R1	Cyclophilin A	protein coding
CNAG_03624	1575	986	1.59736	R1	pescadillo	protein coding
CNAG_03629	1985	1376	1.44259	R1	NADH dehydrogenase (quinone), G subunit	protein coding
CNAG_03631	497	375	1.32533	R1	hypothetical protein	protein coding
CNAG_03633	452	132	3.42424	R1	hypothetical protein	protein coding
CNAG_03637	698	365	1.91233	R1	ATP-dependent DNA helicase 2 subunit 2	protein coding
CNAG_03639	285	93	3.06452	R1	hypothetical protein	protein coding
CNAG_03641	1522	1051	1.44814	R1	translation initiation factor 3 subunit D	protein coding
CNAG_03646	628	271	2.31734	R1	phosphoribosylformimino-5-aminoimidazole carboxamide ribotide isomerase	protein coding
CNAG_03651	588	323	1.82043	R1	syntaxin 7	protein coding
CNAG_03653	804	549	1.46448	R1	hypothetical protein	protein coding
CNAG_03654	452	171	2.64327	R1	ATP-dependent DNA helicase	protein coding
CNAG_03656	72	49	1.46939	R1	hypothetical protein	protein coding
CNAG_03658	625	267	2.34082	R1	hypothetical protein	protein coding
CNAG_03659	919	222	4.13964	R1	DNA replication regulator DPB11	protein coding
CNAG_03661	386	178	2.16854	R1	hypothetical protein, hypothetical protein, variant	protein coding
CNAG_03664	711	462	1.53896	R1	high-affinity nickel-transporter	protein coding
CNAG_03666	290	75	3.86667	R1	acyl-CoA dehydrogenase	protein coding
CNAG_03667	458	361	1.2687	R1	hypothetical protein	protein coding
CNAG_03669	908	283	3.20848	R1	hypothetical protein	protein coding
CNAG_03671	466	204	2.28431	R1	hypothetical protein	protein coding
CNAG_03672	407	232	1.75431	R1	BET3 family protein	protein coding
CNAG_03674	2625	1197	2.19298	R1	oxoglutarate dehydrogenase (succinyl- transferring), E1 component	protein coding
CNAG_03676	457	244	1.87295	R1	D-lactate dehydrogenase	protein coding
CNAG_03678	359	222	1.61712	R1	hypothetical protein	protein coding
CNAG_03682	475	511	0.92955	R1	FK506-binding protein 1	protein coding
CNAG_03683	429	118	3.63559	R1	short-chain dehydrogenase/reductase SDR	protein coding
CNAG_03684	882	787	1.12071	R1	ATP-binding cassette, subfamily B (MDR/TAP), member 10	protein coding
CNAG_03685	420	218	1.92661	R1	hypothetical protein	protein coding
CNAG_03687	233	149	1.56376	R1	hypothetical protein	protein coding
CNAG_03688	486	372	1.30645	R1	hypothetical protein	protein coding
CNAG_03689	462	237	1.94937	R1	zf-C3HC4 type zinc finger protein	protein coding
CNAG_03692	212	89	2.38202	R1	hypothetical protein	protein coding
CNAG_03694	532	283	1.87986	R1	iron ion transporter	protein coding
CNAG_03697	91	114	0.798246	R1	hormone-sensitive lipase	protein coding
CNAG_03698	445	314	1.4172	R1	E3 ubiquitin-protein ligase UBR7	protein coding
CNAG_03700	882	246	3.58537	R1	hypothetical protein	protein coding
CNAG_03701	3584	1006	3.56262	R1	3-phosphoshikimate 1-carboxyvinyltransferase	protein coding
CNAG_03707	376	231	1.62771	R1	efflux protein	protein coding
CNAG_03710	1077	467	2.30621	R1	hypothetical protein	protein coding
CNAG_03711	219	158	1.38608	R1	oligosaccharidyl-lipid flippase	protein coding
CNAG_03713	23	15	1.53333	R1	efflux protein EncT, efflux protein EncT, variant	protein coding
CNAG_03714	730	434	1.68203	R1	microtubule motor protein	protein coding
CNAG_03720	477	311	1.53376	R1	D-tyrosyl-tRNA(Tyr) deacylase, D-tyrosyl-tRNA(Tyr) deacylase, variant	protein coding
CNAG_03721	741	526	1.40875	R1	26S proteasome regulatory subunit N12	protein coding
CNAG_03723	1067	295	3.61695	R1	nuclear protein	protein coding
CNAG_03725	908	767	1.18383	R1	dTDP-4-dehydrorhamnose reductase	protein coding
CNAG_03728	255	114	2.23684	R1	hypothetical protein	protein coding
CNAG_03730	497	415	1.19759	R1	DNA-directed RNA polymerase II subunit RPB11	protein coding
CNAG_03732	270	201	1.34328	R1	Integral membrane protein	protein coding
CNAG_03734	223	85	2.62353	R1	hypothetical protein, hypothetical protein, variant 1, hypothetical protein, variant 2	protein coding
CNAG_03738	656	291	2.2543	R1	pantetheine-phosphate adenylyltransferase	protein coding
CNAG_03742	2368	670	3.53433	R1	staphylococcal nuclease domain-containing protein 1	protein coding
CNAG_03747	548	665	0.82406	R1	large subunit ribosomal protein L27Ae	protein coding
CNAG_03753	655	356	1.83989	R1	dolichol-phosphate mannosyltransferase	protein coding
CNAG_03755	434	142	3.05634	R1	hypothetical protein	protein coding
CNAG_03759	30	11	2.72727	R1	conidiation-specific protein 6	protein coding
CNAG_03761	2379	511	4.65558	R1	mRNA 3'-end-processing protein rna14	protein coding
CNAG_03762	2160	995	2.17085	R1	AdoMet-dependent rRNA methyltransferase spb1	protein coding
CNAG_03766	601	242	2.48347	R1	ankyrin repeat-containing protein	protein coding
CNAG_03767	1748	708	2.46893	R1	cohesin complex subunit Psm1	protein coding
CNAG_03770	202	113	1.78761	R1	hypothetical protein	protein coding
CNAG_03772	53	22	2.40909	R1	high-affinity glucose transporter	protein coding
CNAG_03775	1149	485	2.36907	R1	hypothetical protein, hypothetical protein, variant 1, hypothetical protein, variant 2	protein coding
CNAG_03777	632	146	4.32877	R1	hypothetical protein	protein coding
CNAG_03779	932	445	2.09438	R1	large subunit ribosomal protein L4, large subunit ribosomal protein L4, variant	protein coding
CNAG_03785	1689	492	3.43293	R1	alpha,alpha-trehalase	protein coding
CNAG_03789	699	573	1.2199	R1	mRNA turnover protein 4	protein coding
CNAG_03791	1190	314	3.78981	R1	CAMKK/ELM protein kinase	protein coding
CNAG_03794	436	192	2.27083	R1	endoplasmic reticulum protein	protein coding
CNAG_03795	385	316	1.21835	R1	N-glycosylase/DNA lyase	protein coding
CNAG_03805	947	663	1.42836	R1	calcium/proton exchanger	protein coding
CNAG_03806	176	121	1.45455	R1	acyltransferase, acyltransferase, variant	protein coding
CNAG_03807	25	29	0.862069	R1	E3 ubiquitin-protein ligase CCNP1IP1, E3 ubiquitin-protein ligase CCNP1IP1, variant	protein coding
CNAG_03808	920	378	2.43386	R1	aromatic amino acid aminotransferase I	protein coding
CNAG_03809	1071	646	1.65789	R1	hypothetical protein	protein coding
CNAG_03811	391	343	1.13994	R1	AGC/YANK protein kinase	protein coding
CNAG_03812	1229	801	1.53433	R1	histidinol-phosphate transaminase	protein coding
CNAG_03814	373	435	0.857471	R1	small nuclear ribonucleoprotein Sm D2, small nuclear ribonucleoprotein Sm D2, variant	protein coding
CNAG_03815	784	396	1.9798	R1	hypothetical protein	protein coding
CNAG_03818	1684	436	3.86239	R1	osomolarity two-component system, response regulator SSK1	protein coding
CNAG_03820	2016	1296	1.55556	R1	nucleolar protein 14	protein coding
CNAG_03823	315	277	1.13718	R1	RING-box protein 1	protein coding
CNAG_03824	941	744	1.26478	R1	solute carrier family 25 (mitochondrial phosphate transporter), member 3	protein coding
CNAG_03826	1037	422	2.45735	R1	histone acetyltransferase esa1	protein coding
CNAG_03832	663	635	1.04409	R1	alpha 1,2-mannosyltransferase	protein coding
CNAG_03834	514	185	2.77838	R1	C4-hydroxylase	protein coding
CNAG_03837	179	122	1.46721	R1	protein-L-isoaspartate O-methyltransferase	protein coding
CNAG_03839	1993	572	3.48427	R1	CCR4-NOT transcription complex subunit 4, CCR4-NOT transcription complex subunit 4, variant 1, CCR4-NOT transcription complex subunit 4, variant 2	protein coding
CNAG_03843	1212	208	5.82692	R1	NAK protein kinase, NAK protein kinase, variant	protein coding
CNAG_03845	347	267	1.29963	R1	multidrug resistance protein fnx1	protein coding
CNAG_03847	445	473	0.940803	R1	hypothetical protein	protein coding
CNAG_03850	775	604	1.28311	R1	transcriptional activator spt7	protein coding
CNAG_03853	558	567	0.984127	R1	small copII coat GTPase	protein coding
CNAG_03855	199	91	2.18681	R1	phosphatidylinositol glycan, class M	protein coding
CNAG_03858	753	496	1.51815	R1	hypothetical protein	protein coding
CNAG_03859	988	364	2.71429	R1	transcriptional regulator Medusa, transcriptional regulator Medusa, variant	protein coding
CNAG_03861	499	516	0.967054	R1	cytochrome c oxidase subunit 5a	protein coding
CNAG_03863	1104	822	1.34307	R1	protein arginine N-methyltransferase 1, protein arginine N-methyltransferase 1, variant	protein coding
CNAG_03864	1120	350	3.2	R1	hypothetical protein	protein coding
CNAG_03866	487	164	2.96951	R1	solute carrier family 32 (vesicular inhibitory amino acid transporter)	protein coding
CNAG_03868	613	237	2.5865	R1	hypothetical protein	protein coding
CNAG_03869	153	220	0.695455	R1	hypothetical protein	protein coding
CNAG_03872	795	159	5	R1	putative ubiquitin carboxyl-terminal hydrolase	protein coding
CNAG_03873	354	184	1.92391	R1	hypothetical protein, hypothetical protein, variant	protein coding
CNAG_03875	795	565	1.40708	R1	galactose-1-phosphate uridylyltransferase	protein coding
CNAG_03876	590	291	2.02749	R1	Ras family protein	protein coding
CNAG_03877	775	456	1.69956	R1	AP-3 complex subunit mu, AP-3 complex subunit mu, variant	protein coding
CNAG_03881	174	225	0.773333	R1	hypothetical protein	protein coding
CNAG_03882	656	244	2.68852	R1	hypothetical protein	protein coding
CNAG_03885	551	475	1.16	R1	cytoplasmic protein	protein coding
CNAG_03887	521	352	1.48011	R1	hypothetical protein	protein coding
CNAG_03890	866	389	2.22622	R1	protein lysine methyltransferase SET5	protein coding
CNAG_03891	1737	1674	1.03763	R1	hsp60-like protein	protein coding
CNAG_03898	700	457	1.53173	R1	phosphoadenosine phosphosulfate reductase	protein coding
CNAG_03900	600	420	1.42857	R1	f-actin-capping protein subunit beta	protein coding
CNAG_03902	1241	536	2.3153	R1	Regulator of drug sensitivity 2, putative	protein coding
CNAG_03903	818	535	1.52897	R1	hypothetical protein	protein coding
CNAG_03904	1124	975	1.15282	R1	26S protease regulatory subunit 6B	protein coding
CNAG_03906	142	50	2.84	R1	hypothetical protein	protein coding
CNAG_03907	716	235	3.04681	R1	LIM domain containing protein	protein coding
CNAG_03908	579	332	1.74398	R1	wd-repeat protein	protein coding
CNAG_03910	261	69	3.78261	R1	myo-inositol transporter, putative	protein coding
CNAG_03911	27	17	1.58824	R1	hydrolase	protein coding
CNAG_03913	555	220	2.52273	R1	hypothetical protein, hypothetical protein, variant	protein coding
CNAG_03914	734	303	2.42244	R1	hypothetical protein, hypothetical protein, variant	protein coding
CNAG_03916	1645	1347	1.22123	R1	glucose-6-phosphate isomerase	protein coding
CNAG_03918	636	352	1.80682	R1	ram signaling network protein	protein coding
CNAG_03919	417	174	2.39655	R1	acetate non-utilizing protein 9, mitochondrial	protein coding
CNAG_03925	342	222	1.54054	R1	mitochondrial inner membrane protease subunit 2	protein coding
CNAG_03927	323	244	1.32377	R1	hypothetical protein	protein coding
CNAG_03930	491	324	1.51543	R1	hypothetical protein	protein coding
CNAG_03932	262	276	0.949275	R1	cell cycle checkpoint protein	protein coding
CNAG_03935	1307	524	2.49427	R1	endothelin-converting enzyme	protein coding
CNAG_03936	617	482	1.28008	R1	NAD(P)H:quinone oxidoreductase, type IV	protein coding
CNAG_03939	1144	496	2.30645	R1	5-aminolevulinic acid synthase	protein coding
CNAG_03944	1260	1140	1.10526	R1	chaperone regulator	protein coding
CNAG_03946	762	164	4.64634	R1	galactokinase, galactokinase, variant	protein coding
CNAG_03949	696	310	2.24516	R1	4-nitrophenyl phosphatase	protein coding
CNAG_03951	285	386	0.738342	R1	hypothetical protein	protein coding
CNAG_03952	438	488	0.897541	R1	hypothetical protein	protein coding
CNAG_03955	197	132	1.49242	R1	L-methionine transporter	protein coding
CNAG_03957	824	533	1.54597	R1	4-nitrophenyl phosphatase	protein coding
CNAG_03958	456	256	1.78125	R1	hypothetical protein	protein coding
CNAG_03960	587	233	2.51931	R1	Gly-Xaa carboxypeptidase	protein coding
CNAG_03962	1770	635	2.7874	R1	minichromosome maintenance protein 6	protein coding
CNAG_03964	790	259	3.05019	R1	zinc knuckle family protein	protein coding
CNAG_03966	546	235	2.3234	R1	hypothetical protein	protein coding
CNAG_03967	1057	720	1.46806	R1	F-actin capping protein	protein coding
CNAG_03968	583	501	1.16367	R1	polyadenylate-binding protein 2	protein coding
CNAG_03975	2073	830	2.49759	R1	ribosome biogenesis protein ERB1	protein coding
CNAG_03977	812	262	3.09924	R1	hypothetical protein	protein coding
CNAG_03980	15	18	0.833333	R1	hypothetical protein, hypothetical protein, variant	protein coding
CNAG_03981	320	131	2.44275	R1	palmitoyltransferase pfa4	protein coding
CNAG_03982	452	281	1.60854	R1	hypothetical protein	protein coding
CNAG_03983	956	830	1.15181	R1	oxidoreductase	protein coding
CNAG_03984	355	273	1.30037	R1	hypothetical protein	protein coding
CNAG_03986	838	605	1.38512	R1	NAM9 protein	protein coding
CNAG_03987	1697	744	2.28091	R1	elongation factor 1 alpha-like protein	protein coding
CNAG_03988	296	67	4.41791	R1	solute carrier family 38 (sodium-coupled neutral amino acid transporter), member 11	protein coding
CNAG_03991	420	217	1.93548	R1	Integral membrane protein	protein coding
CNAG_03994	469	162	2.89506	R1	leucine carboxyl methyltransferase 1	protein coding
CNAG_03996	978	757	1.29194	R1	guanosine-diphosphatase	protein coding
CNAG_03998	549	383	1.43342	R1	MADS-box transcription factor	protein coding
CNAG_03999	131	48	2.72917	R1	hypothetical protein	protein coding
CNAG_04000	537	400	1.3425	R1	cytochrome c oxidase assembly protein subunit 11	protein coding
CNAG_04001	695	580	1.19828	R1	20S proteasome subunit alpha 1	protein coding
CNAG_04009	2311	886	2.60835	R1	aminopeptidase 2	protein coding
CNAG_04010	1136	565	2.01062	R1	GTP cyclohydrolase I	protein coding
CNAG_04012	180	139	1.29496	R1	hypothetical protein	protein coding
CNAG_04014	1086	663	1.63801	R1	26S proteasome regulatory subunit N9	protein coding
CNAG_04018	845	284	2.97535	R1	hypothetical protein	protein coding
CNAG_04023	1153	459	2.51198	R1	hypothetical protein	protein coding
CNAG_04024	26	55	0.472727	R1	myo-inositol transporter	protein coding
CNAG_04026	426	276	1.54348	R1	chromosome transmission fidelity protein 1	protein coding
CNAG_04027	48	19	2.52632	R1	hypothetical protein	protein coding
CNAG_04029	24	19	1.26316	R1	Cytochrome P450	protein coding
CNAG_04030	260	248	1.04839	R1	hypothetical protein, hypothetical protein, variant	protein coding
CNAG_04032	1648	1093	1.50778	R1	AFG3 family protein	protein coding
CNAG_04037	330	314	1.05096	R1	hypothetical protein	protein coding
CNAG_04038	131	80	1.6375	R1	MFS quinate transporter QutD	protein coding
CNAG_04041	835	178	4.69101	R1	hypothetical protein	protein coding
CNAG_04044	869	335	2.59403	R1	U3 small nucleolar RNA-associated protein 6	protein coding
CNAG_04046	383	261	1.46743	R1	hypothetical protein	protein coding
CNAG_04048	1075	519	2.07129	R1	53 kda brg1-associated factor b	protein coding
CNAG_04050	490	633	0.774092	R1	small nuclear ribonucleoprotein D3	protein coding
CNAG_04052	1126	315	3.5746	R1	minichromosome maintenance protein 5 (cell division control protein 46)	protein coding
CNAG_04053	425	277	1.5343	R1	hypothetical protein	protein coding
CNAG_04055	316	96	3.29167	R1	cell cycle checkpoint protein	protein coding
CNAG_04063	455	185	2.45946	R1	selenoprotein W	protein coding
CNAG_04064	504	509	0.990177	R1	hypothetical protein	protein coding
CNAG_04066	482	412	1.1699	R1	endoribonuclease L-PSP	protein coding
CNAG_04068	590	777	0.759331	R1	large subunit ribosomal protein L28e	protein coding
CNAG_04070	580	353	1.64306	R1	exonuclease	protein coding
CNAG_04071	781	546	1.4304	R1	20S proteasome subunit alpha 6	protein coding
CNAG_04073	1041	444	2.34459	R1	hypothetical protein	protein coding
CNAG_04077	41	11	3.72727	R1	hypothetical protein	protein coding
CNAG_04079	937	390	2.40256	R1	HAT1-interacting factor 1	protein coding
CNAG_04081	416	191	2.17801	R1	hypothetical protein	protein coding
CNAG_04083	401	206	1.9466	R1	dolichol kinase, dolichol kinase, variant	protein coding
CNAG_04085	41	99	0.414141	R1	oxidoreductase, oxidoreductase, variant	protein coding
CNAG_04087	242	110	2.2	R1	hypothetical protein	protein coding
CNAG_04089	535	562	0.951957	R1	coatomer zeta subunit	protein coding
CNAG_04094	331	154	2.14935	R1	hypothetical protein	protein coding
CNAG_04100	131	54	2.42593	R1	hypothetical protein	protein coding
CNAG_04101	172	219	0.785388	R1	hypothetical protein	protein coding
CNAG_04105	213	291	0.731959	R1	hypothetical protein	protein coding
CNAG_04106	415	47	8.82979	R1	hypothetical protein	protein coding
CNAG_04108	606	369	1.64228	R1	pyruvate dehydrogenase kinase	protein coding
CNAG_04113	1083	947	1.14361	R1	hypothetical protein	protein coding
CNAG_04117	237	92	2.57609	R1	hypothetical protein	protein coding
CNAG_04118	931	576	1.61632	R1	CMGC/CDK/CRK7 protein kinase	protein coding
CNAG_04120	1156	363	3.18457	R1	RNA polymerase II subunit A domain phosphatase	protein coding
CNAG_04121	383	419	0.914081	R1	hypothetical protein, hypothetical protein, variant	protein coding
CNAG_04122	383	128	2.99219	R1	galactose dehydrogenase	protein coding
CNAG_04128	486	215	2.26047	R1	GTPase inhibitor	protein coding
CNAG_04130	1148	720	1.59444	R1	hypothetical protein	protein coding
CNAG_04131	1547	849	1.82214	R1	antiviral helicase SKI2	protein coding
CNAG_04137	883	291	3.03436	R1	hypothetical protein	protein coding
CNAG_04142	107	21	5.09524	R1	tartrate transporter	protein coding
CNAG_04147	1059	269	3.9368	R1	ATP-dependent rRNA helicase RRP3	protein coding
CNAG_04149	1107	742	1.49191	R1	nuclear pore complex protein Nup107	protein coding
CNAG_04151	1784	657	2.71537	R1	oxysterol-binding protein	protein coding
CNAG_04153	125	95	1.31579	R1	hypothetical protein	protein coding
CNAG_04155	359	374	0.959893	R1	small nuclear ribonucleoprotein E	protein coding
CNAG_04157	552	233	2.3691	R1	kinetochore protein Mis12/MTW1	protein coding
CNAG_04161	766	387	1.97933	R1	hypothetical protein	protein coding
CNAG_04162	863	315	2.73968	R1	AGC/PKA protein kinase	protein coding
CNAG_04165	243	123	1.97561	R1	hypothetical protein	protein coding
CNAG_04167	333	314	1.06051	R1	hypothetical protein	protein coding
CNAG_04169	271	136	1.99265	R1	holo-[acyl-carrier protein] synthase	protein coding
CNAG_04172	566	250	2.264	R1	transcription factor C subunit 6	protein coding
CNAG_04174	460	180	2.55556	R1	Peroxisomal ATPase PEX6	protein coding
CNAG_04176	1026	481	2.13306	R1	hypothetical protein	protein coding
CNAG_04177	521	281	1.85409	R1	COP9 signalosome complex subunit 7, COP9 signalosome complex subunit 7, variant	protein coding
CNAG_04179	1857	1109	1.67448	R1	lysine-tRNA ligase	protein coding
CNAG_04181	802	327	2.4526	R1	RNA-binding domain-containing protein, X-linked 2	protein coding
CNAG_04182	610	379	1.6095	R1	hypothetical protein	protein coding
CNAG_04184	335	133	2.5188	R1	hypothetical protein	protein coding
CNAG_04185	143	30	4.76667	R1	hypothetical protein	protein coding
CNAG_04186	291	122	2.38525	R1	hypothetical protein	protein coding
CNAG_04189	1666	1269	1.31284	R1	succinate dehydrogenase [ubiquinone] flavoprotein subunit, mitochondrial	protein coding
CNAG_04191	1311	330	3.97273	R1	SCYL protein kinase	protein coding
CNAG_04193	450	389	1.15681	R1	hypothetical protein	protein coding
CNAG_04198	1167	322	3.62422	R1	hypothetical protein	protein coding
CNAG_04200	389	180	2.16111	R1	C2 domain-containing protein	protein coding
CNAG_04202	672	188	3.57447	R1	cytosolic Fe-S cluster assembly factor NAR1	protein coding
CNAG_04204	299	317	0.943218	R1	transcription elongation factor spt4	protein coding
CNAG_04206	368	186	1.97849	R1	hypothetical protein	protein coding
CNAG_04208	776	206	3.76699	R1	ataxin-3	protein coding
CNAG_04211	1322	672	1.96726	R1	nuclear RNA export factor 1/2	protein coding
CNAG_04213	1379	301	4.5814	R1	signal transducer	protein coding
CNAG_04218	305	166	1.83735	R1	hypothetical protein	protein coding
CNAG_04220	621	208	2.98558	R1	ATP-dependent DNA helicase II subunit 1	protein coding
CNAG_04225	31	27	1.14815	R1	hypothetical protein	protein coding
CNAG_04227	2657	470	5.65319	R1	hypothetical protein	protein coding
CNAG_04230	1033	418	2.47129	R1	hydroxyethylthiazole kinase	protein coding
CNAG_04232	255	105	2.42857	R1	hypothetical protein	protein coding
CNAG_04234	464	223	2.08072	R1	hypothetical protein	protein coding
CNAG_04236	700	504	1.38889	R1	pyridoxal phosphate phosphatase phospho2	protein coding
CNAG_04237	347	260	1.33462	R1	hypothetical protein	protein coding
CNAG_04239	723	146	4.95205	R1	hypothetical protein	protein coding
CNAG_04241	435	169	2.57396	R1	cytoplasmic protein, cytoplasmic protein, variant	protein coding
CNAG_04244	892	251	3.55378	R1	hypothetical protein	protein coding
CNAG_04246	24	35	0.685714	R1	hypothetical protein	protein coding
CNAG_04248	584	92	6.34783	R1	ubiquitin thioesterase OTUB1	protein coding
CNAG_04252	386	217	1.7788	R1	hypothetical protein	protein coding
CNAG_04254	123	72	1.70833	R1	hypothetical protein	protein coding
CNAG_04256	190	109	1.74312	R1	hypothetical protein	protein coding
CNAG_04258	367	274	1.33942	R1	ADP-ribosylation factor	protein coding
CNAG_04260	1155	417	2.76978	R1	translation initiation factor eIF-2B subunit gamma	protein coding
CNAG_04262	155	66	2.34848	R1	E3 ubiquitin-protein ligase NRDP1, E3 ubiquitin-protein ligase NRDP1, variant	protein coding
CNAG_04263	597	210	2.84286	R1	hypothetical protein	protein coding
CNAG_04265	1284	595	2.15798	R1	hypothetical protein	protein coding
CNAG_04267	660	227	2.90749	R1	mitochondrial genome maintenance protein	protein coding
CNAG_04268	409	115	3.55652	R1	exodeoxyribonuclease III	protein coding
CNAG_04270	460	202	2.27723	R1	syntaxin 8	protein coding
CNAG_04272	810	563	1.43872	R1	CAMK/CAMK1 protein kinase	protein coding
CNAG_04273	675	566	1.19258	R1	hypothetical protein	protein coding
CNAG_04274	30	19	1.57895	R1	acyl-CoA thioesterase II	protein coding
CNAG_04276	895	318	2.81447	R1	cytosine-purine permease	protein coding
CNAG_04278	1151	411	2.80049	R1	DNA ligase 1	protein coding
CNAG_04280	27	11	2.45455	R1	hypothetical protein	protein coding
CNAG_04283	772	456	1.69298	R1	Integral membrane protein, integral membrane protein, variant	protein coding
CNAG_04284	1193	737	1.61872	R1	hypothetical protein	protein coding
CNAG_04286	478	458	1.04367	R1	DNA-directed RNA polymerase I, II, and III subunit RPABC3	protein coding
CNAG_04289	1043	945	1.1037	R1	hypothetical protein	protein coding
CNAG_04294	216	95	2.27368	R1	hypothetical protein	protein coding
CNAG_04295	458	221	2.0724	R1	hypothetical protein	protein coding
CNAG_04296	526	148	3.55405	R1	hypothetical protein	protein coding
CNAG_04298	1746	719	2.42837	R1	nucleolar complex protein 3	protein coding
CNAG_04300	442	323	1.36842	R1	hypothetical protein	protein coding
CNAG_04302	604	316	1.91139	R1	hypothetical protein	protein coding
CNAG_04304	1529	1273	1.2011	R1	T-complex protein 1 subunit zeta	protein coding
CNAG_04306	414	432	0.958333	R1	vesicle transporter SFT2B	protein coding
CNAG_04307	535	88	6.07955	R1	Urate oxidase	protein coding
CNAG_04309	289	223	1.29596	R1	hypothetical protein	protein coding
CNAG_04310	702	208	3.375	R1	hypothetical protein	protein coding
CNAG_04314	522	228	2.28947	R1	NAD kinase, NAD kinase, variant	protein coding
CNAG_04318	798	412	1.93689	R1	telomere length regulation protein	protein coding
CNAG_04320	1014	510	1.98824	R1	polysaccharide synthase Cps1p	protein coding
CNAG_04323	262	105	2.49524	R1	hypothetical protein	protein coding
CNAG_04326	509	262	1.94275	R1	malate dehydrogenase (oxaloacetate- decarboxylating)	protein coding
CNAG_04327	3473	1102	3.15154	R1	hypothetical protein	protein coding
CNAG_04328	418	334	1.2515	R1	ubiquitin-conjugating enzyme E2 I	protein coding
CNAG_04332	325	274	1.18613	R1	large subunit ribosomal protein L31	protein coding
CNAG_04334	845	627	1.34769	R1	hypothetical protein	protein coding
CNAG_04335	1616	601	2.68885	R1	phosphatidylinositol 4-kinase	protein coding
CNAG_04338	674	352	1.91477	R1	cation diffusion facilitator 1	protein coding
CNAG_04343	39	48	0.8125	R1	nicotinamide mononucleotide permease	protein coding
CNAG_04345	120	77	1.55844	R1	specific RNA polymerase II transcription factor	protein coding
CNAG_04348	1085	707	1.53465	R1	chaperone	protein coding
CNAG_04352	683	192	3.55729	R1	Putative zinc finger transcription factor	protein coding
CNAG_04353	593	152	3.90132	R1	hypothetical protein, hypothetical protein, variant	protein coding
CNAG_04355	473	120	3.94167	R1	hypothetical protein	protein coding
CNAG_04358	728	284	2.56338	R1	iron-sulfur clusters transporter ATM1, mitochondrial, variant, iron-sulfur clusters transporter atm1, mitochondrial	protein coding
CNAG_04360	1152	479	2.40501	R1	tRNA (guanine37-N1)-methyltransferase	protein coding
CNAG_04361	1564	572	2.73427	R1	hypothetical protein	protein coding
CNAG_04365	2309	1240	1.8621	R1	ribosome biogenesis protein MAK21	protein coding
CNAG_04367	492	209	2.35407	R1	hypothetical protein	protein coding
CNAG_04369	234	79	2.96203	R1	hypothetical protein	protein coding
CNAG_04371	188	272	0.691176	R1	WD40 domain-containing protein	protein coding
CNAG_04373	1030	847	1.21606	R1	alginate lyase	protein coding
CNAG_04374	34	67	0.507463	R1	hypothetical protein	protein coding
CNAG_04375	1136	778	1.46015	R1	hexaprenyl-diphosphate synthase	protein coding
CNAG_04377	530	423	1.25296	R1	vacuolar protein	protein coding
CNAG_04381	551	186	2.96237	R1	transcription initiation factor TFIIH subunit 2	protein coding
CNAG_04383	613	387	1.58398	R1	acetyltransferase	protein coding
CNAG_04387	364	244	1.4918	R1	thioredoxin-like protein 4A	protein coding
CNAG_04389	396	262	1.51145	R1	hypothetical protein	protein coding
CNAG_04393	1775	535	3.31776	R1	RNA helicase	protein coding
CNAG_04395	949	586	1.61945	R1	protein BFR2	protein coding
CNAG_04397	607	205	2.96098	R1	hypothetical protein	protein coding
CNAG_04399	595	306	1.94444	R1	YggS family pyridoxal phosphate enzyme	protein coding
CNAG_04401	793	578	1.37197	R1	alpha-soluble NSF attachment protein	protein coding
CNAG_04403	592	193	3.06736	R1	CCCH zinc finger protein	protein coding
CNAG_04405	632	285	2.21754	R1	cyclin H	protein coding
CNAG_04407	893	247	3.61538	R1	dynein intermediate chain, cytosolic	protein coding
CNAG_04408	1128	407	2.7715	R1	choline kinase	protein coding
CNAG_04411	449	197	2.27919	R1	hypothetical protein	protein coding
CNAG_04412	730	244	2.9918	R1	hypothetical protein	protein coding
CNAG_04414	689	276	2.49638	R1	multidrug resistance protein fnx1	protein coding
CNAG_04415	116	33	3.51515	R1	oxidoreductase	protein coding
CNAG_04433	1336	410	3.25854	R1	CMGC/DYRK/DYRK2 protein kinase	protein coding
CNAG_04437	476	218	2.18349	R1	nicotinamide riboside kinase, nicotinamide riboside kinase, variant	protein coding
CNAG_04439	1250	497	2.51509	R1	V-type proton ATPase subunit B	protein coding
CNAG_04441	2073	1537	1.34873	R1	polyadenylate-binding protein, cytoplasmic and nuclear	protein coding
CNAG_04443	632	296	2.13514	R1	hypothetical protein	protein coding
CNAG_04444	2780	747	3.72155	R1	splicing factor 3B subunit 1	protein coding
CNAG_04447	475	156	3.04487	R1	hypothetical protein	protein coding
CNAG_04448	682	762	0.895013	R1	large subunit ribosomal protein L19e	protein coding
CNAG_04449	232	294	0.789116	R1	alpha-1,6-mannosyltransferase	protein coding
CNAG_04450	2844	641	4.43682	R1	chromodomain-helicase-DNA-binding protein 1	protein coding
CNAG_04451	658	350	1.88	R1	ribonuclease P/MRP protein subunit POP1	protein coding
CNAG_04453	511	179	2.85475	R1	inositolphosphorylceramide synthase	protein coding
CNAG_04456	602	297	2.02694	R1	hypothetical protein	protein coding
CNAG_04458	698	228	3.0614	R1	DNA helicase, DNA helicase, variant	protein coding
CNAG_04462	462	139	3.32374	R1	F-box protein 9	protein coding
CNAG_04466	201	114	1.76316	R1	hypothetical protein	protein coding
CNAG_04467	780	111	7.02703	R1	succinate-semialdehyde dehydrogenase (NADP)	protein coding
CNAG_04469	126	13	9.69231	R1	4-aminobutyrate transaminase	protein coding
CNAG_04471	59	33	1.78788	R1	FAD dependent oxidoreductase	protein coding
CNAG_04474	482	306	1.57516	R1	monocarboxylic acid transporter	protein coding
CNAG_04476	13	17	0.764706	R1	hypothetical protein, hypothetical protein, variant	protein coding
CNAG_04478	2079	424	4.9033	R1	hypothetical protein	protein coding
CNAG_04485	1822	842	2.1639	R1	long-chain acyl-CoA synthetase	protein coding
CNAG_04487	291	291	1	R1	transcription regulator	protein coding
CNAG_04493	428	188	2.2766	R1	ubiquitin carboxyl-terminal hydrolase 48, ubiquitin carboxyl-terminal hydrolase 48, variant	protein coding
CNAG_04498	451	411	1.09732	R1	alpha-1,2-mannosidase	protein coding
CNAG_04499	815	447	1.82327	R1	clathrin light chain	protein coding
CNAG_04501	1732	654	2.64832	R1	anthranilate synthase/indole-3-glycerol phosphate synthase/phosphoribosylanthranilate isomerase	protein coding
CNAG_04502	919	567	1.62081	R1	hypothetical protein	protein coding
CNAG_04504	542	192	2.82292	R1	hypothetical protein, hypothetical protein, variant	protein coding
CNAG_04505	824	477	1.72746	R1	guanine nucleotide-binding protein subunit alpha	protein coding
CNAG_04507	54	94	0.574468	R1	hypothetical protein	protein coding
CNAG_04510	1045	465	2.24731	R1	vacuolar protein-sorting-associated protein 4	protein coding
CNAG_04513	1978	765	2.58562	R1	DNA-directed RNA polymerase III subunit RPC2	protein coding
CNAG_04516	136	280	0.485714	R1	WSC domain-containing protein	protein coding
CNAG_04519	162	29	5.58621	R1	D-serine dehydratase	protein coding
CNAG_04520	97	94	1.03191	R1	D-aminoacylase	protein coding
CNAG_04521	106	13	8.15385	R1	oxidoreductase	protein coding
CNAG_04522	557	414	1.34541	R1	hypothetical protein	protein coding
CNAG_04524	450	318	1.41509	R1	zinc metalloprotease	protein coding
CNAG_04527	468	290	1.61379	R1	hypothetical protein	protein coding
CNAG_04529	302	138	2.18841	R1	cytochrome c oxidase-assembly factor COX16	protein coding
CNAG_04531	657	496	1.3246	R1	Enoyl-CoA hydratase	protein coding
CNAG_04534	278	46	6.04348	R1	hypothetical protein, hypothetical protein, variant	protein coding
CNAG_04535	19	19	1	R1	Tartrate dehydrogenase	protein coding
CNAG_04537	160	150	1.06667	R1	hypothetical protein	protein coding
CNAG_04541	976	307	3.17915	R1	cleavage stimulation factor subunit 2	protein coding
CNAG_04544	215	91	2.36264	R1	hypothetical protein	protein coding
CNAG_04545	432	171	2.52632	R1	CTD kinase subunit gamma, CTD kinase subunit gamma, variant	protein coding
CNAG_04546	18	12	1.5	R1	multidrug transporter	protein coding
CNAG_04561	115	69	1.66667	R1	monooxygenase	protein coding
CNAG_04564	187	95	1.96842	R1	phytanoyl-CoA dioxygenase	protein coding
CNAG_04566	845	603	1.40133	R1	beta-flanking protein	protein coding
CNAG_04570	2150	1435	1.49826	R1	hypothetical protein	protein coding
CNAG_04574	193	123	1.56911	R1	dolichyl-phosphate mannosyltransferase polypeptide 2, regulatory subunit	protein coding
CNAG_04576	202	95	2.12632	R1	hypothetical protein	protein coding
CNAG_04579	384	425	0.903529	R1	Alpha-1,2-mannosyltransferase	protein coding
CNAG_04581	406	247	1.64372	R1	hypothetical protein	protein coding
CNAG_04582	29	11	2.63636	R1	hypothetical protein	protein coding
CNAG_04584	1015	698	1.45415	R1	poly(rC)-binding protein 2/3/4	protein coding
CNAG_04585	31	13	2.38462	R1	hypothetical protein	protein coding
CNAG_04587	932	242	3.85124	R1	hypothetical protein, hypothetical protein, variant	protein coding
CNAG_04590	55	57	0.964912	R1	hypothetical protein	protein coding
CNAG_04591	53	160	0.33125	R1	hypothetical protein	protein coding
CNAG_04594	292	67	4.35821	R1	hypothetical protein	protein coding
CNAG_04596	277	103	2.68932	R1	prolyl endopeptidase, prolyl endopeptidase, variant	protein coding
CNAG_04597	116	69	1.68116	R1	hypothetical protein	protein coding
CNAG_04599	1107	278	3.98201	R1	3-methyl-2-oxobutanoate hydroxymethyltransferase	protein coding
CNAG_04601	1504	1295	1.16139	R1	glycine hydroxymethyltransferase	protein coding
CNAG_04602	131	23	5.69565	R1	hypothetical protein	protein coding
CNAG_04604	1713	831	2.06137	R1	tryptophan-tRNA ligase	protein coding
CNAG_04605	1128	1056	1.06818	R1	C-3 sterol dehydrogenase	protein coding
CNAG_04612	532	521	1.02111	R1	hypothetical protein, hypothetical protein, variant 1, hypothetical protein, variant 2	protein coding
CNAG_04614	13	23	0.565217	R1	hypothetical protein	protein coding
CNAG_04616	31	18	1.72222	R1	hypothetical protein	protein coding
CNAG_04617	66	48	1.375	R1	OPT family small oligopeptide transporter	protein coding
CNAG_04618	84	53	1.58491	R1	hypothetical protein, hypothetical protein, variant	protein coding
CNAG_04619	61	55	1.10909	R1	prolyl oligopeptidase	protein coding
CNAG_04620	292	316	0.924051	R1	hypothetical protein	protein coding
CNAG_04621	1105	196	5.63776	R1	glycogen(starch) synthase, glycogen(starch) synthase, variant	protein coding
CNAG_04622	787	155	5.07742	R1	endoplasmic reticulum protein	protein coding
CNAG_04626	76	19	4	R1	hypothetical protein	protein coding
CNAG_04628	741	527	1.40607	R1	translation initiation factor 6	protein coding
CNAG_04629	1183	752	1.57314	R1	Mob1 family protein	protein coding
CNAG_04630	1443	368	3.9212	R1	hypothetical protein	protein coding
CNAG_04631	183	31	5.90323	R1	ribitol kinase	protein coding
CNAG_04638	29	37	0.783784	R1	hypothetical protein	protein coding
CNAG_04641	754	357	2.11204	R1	general transcription factor 3C polypeptide 3 (transcription factor C subunit 4)	protein coding
CNAG_04642	1000	458	2.18341	R1	tetraspanin Tsp2	protein coding
CNAG_04646	352	314	1.12102	R1	hypothetical protein	protein coding
CNAG_04647	791	225	3.51556	R1	Glutathione synthetase	protein coding
CNAG_04648	1583	658	2.40578	R1	sister chromatid cohesion protein pds5	protein coding
CNAG_04650	457	185	2.47027	R1	actin-like protein arp6	protein coding
CNAG_04651	766	372	2.05914	R1	hypothetical protein	protein coding
CNAG_04657	444	94	4.7234	R1	Short-chain dehydrogenase	protein coding
CNAG_04659	1339	352	3.80398	R1	Pyruvate decarboxylase	protein coding
CNAG_04664	400	332	1.20482	R1	large subunit ribosomal protein L37	protein coding
CNAG_04666	1134	910	1.24615	R1	26S protease regulatory subunit 8	protein coding
CNAG_04668	438	188	2.32979	R1	ubiquitin-conjugating enzyme E2 M	protein coding
CNAG_04670	1281	675	1.89778	R1	hypothetical protein	protein coding
CNAG_04671	593	208	2.85096	R1	hypothetical protein	protein coding
CNAG_04674	851	318	2.6761	R1	transcriptional adapter 3	protein coding
CNAG_04675	191	38	5.02632	R1	hypothetical protein	protein coding
CNAG_04676	2462	1017	2.42085	R1	6-phosphofructokinase	protein coding
CNAG_04680	469	144	3.25694	R1	hypothetical protein	protein coding
CNAG_04683	536	422	1.27014	R1	hypothetical protein	protein coding
CNAG_04686	460	112	4.10714	R1	hypothetical protein	protein coding
CNAG_04688	114	27	4.22222	R1	acyl-CoA dehydrogenase	protein coding
CNAG_04690	441	214	2.06075	R1	acylpyruvate hydrolase, acylpyruvate hydrolase, variant	protein coding
CNAG_04692	707	456	1.55044	R1	thymidylate synthase	protein coding
CNAG_04694	1300	999	1.3013	R1	periodic tryptophan protein 1	protein coding
CNAG_04695	11	19	0.578947	R1	hypothetical protein	protein coding
CNAG_04696	600	152	3.94737	R1	DNA clamp loader	protein coding
CNAG_04698	518	485	1.06804	R1	cytoplasmic protein	protein coding
CNAG_04700	710	656	1.08232	R1	hypothetical protein	protein coding
CNAG_04702	395	261	1.51341	R1	hypothetical protein	protein coding
CNAG_04703	902	399	2.26065	R1	DNA clamp loader	protein coding
CNAG_04707	102	48	2.125	R1	hypothetical protein	protein coding
CNAG_04709	972	682	1.42522	R1	hypothetical protein	protein coding
CNAG_04713	547	501	1.09182	R1	citrate lyase subunit beta-like protein	protein coding
CNAG_04717	38	15	2.53333	R1	hypothetical protein	protein coding
CNAG_04718	343	118	2.90678	R1	hypothetical protein	protein coding
CNAG_04719	609	215	2.83256	R1	solute carrier family 41	protein coding
CNAG_04723	921	521	1.76775	R1	hypothetical protein	protein coding
CNAG_04726	631	747	0.844712	R1	large subunit ribosomal protein L18Ae	protein coding
CNAG_04729	1526	638	2.39185	R1	ATP-dependent RNA helicase DBP7	protein coding
CNAG_04730	307	321	0.956386	R1	G-protein coupled receptor	protein coding
CNAG_04732	295	144	2.04861	R1	hypothetical protein	protein coding
CNAG_04736	472	137	3.44526	R1	hypothetical protein	protein coding
CNAG_04737	1473	342	4.30702	R1	hypothetical protein	protein coding
CNAG_04739	357	209	1.70813	R1	cytochrome c oxidase assembly protein Cox19	protein coding
CNAG_04743	1129	538	2.09851	R1	oligosaccharyltransferase complex subunit beta	protein coding
CNAG_04746	951	506	1.87945	R1	hypothetical protein	protein coding
CNAG_04747	222	194	1.14433	R1	hypothetical protein	protein coding
CNAG_04749	726	516	1.40698	R1	hypothetical protein	protein coding
CNAG_04751	391	262	1.49237	R1	hypothetical protein	protein coding
CNAG_04753	172	103	1.6699	R1	Gluconolactonase	protein coding
CNAG_04755	1393	536	2.59888	R1	STE/STE11/BCK1 protein kinase	protein coding
CNAG_04756	146	37	3.94595	R1	hypothetical protein	protein coding
CNAG_04757	556	257	2.16342	R1	mitochondrial protein	protein coding
CNAG_04760	688	346	1.98844	R1	cytoplasmic protein	protein coding
CNAG_04763	1020	462	2.20779	R1	dolichyl-phosphate-mannose-protein mannosyltransferase	protein coding
CNAG_04765	509	253	2.01186	R1	ARP2/3 complex 21 kDa subunit	protein coding
[truncated: 4,724 more rows]

## Sheet: RPF_RNA_TE_R2
gene_id	rpf	rna	te
CNAG_00003	5	205	0.0243902
CNAG_00004	299	478	0.625523
CNAG_00005	319	139	2.29496
CNAG_00006	716	790	0.906329
CNAG_00008	864	489	1.76687
CNAG_00010	289	897	0.322185
CNAG_00013	18	481	0.037422
CNAG_00017	15	178	0.0842697
CNAG_00019	256	412	0.621359
CNAG_00021	920	759	1.21212
CNAG_00022	538	687	0.783115
CNAG_00023	11	34	0.323529
CNAG_00025	400	415	0.963855
CNAG_00026	1133	1145	0.98952
CNAG_00028	43	380	0.113158
CNAG_00031	241	320	0.753125
CNAG_00036	37	59	0.627119
CNAG_00038	356	395	0.901266
CNAG_00043	365	663	0.550528
CNAG_00045	245	142	1.72535
CNAG_00047	72	138	0.521739
CNAG_00048	3	55	0.0545455
CNAG_00050	321	262	1.22519
CNAG_00051	1112	1075	1.03442
CNAG_00054	11	11	1
CNAG_00057	604	466	1.29614
CNAG_00058	1336	1398	0.955651
CNAG_00060	622	495	1.25657
CNAG_00062	1107	1078	1.0269
CNAG_00064	417	639	0.652582
CNAG_00066	774	916	0.844978
CNAG_00073	1203	1042	1.15451
CNAG_00075	333	456	0.730263
CNAG_00080	5	49	0.102041
CNAG_00081	1599	1497	1.06814
CNAG_00083	989	732	1.35109
CNAG_00085	404	492	0.821138
CNAG_00087	590	572	1.03147
CNAG_00088	645	877	0.735462
CNAG_00089	538	576	0.934028
CNAG_00093	356	614	0.579805
CNAG_00095	676	816	0.828431
CNAG_00097	76	92	0.826087
CNAG_00099	1211	922	1.31345
CNAG_00101	326	531	0.613936
CNAG_00105	5	157	0.0318471
CNAG_00106	1424	1573	0.905277
CNAG_00108	1072	903	1.18715
CNAG_00110	729	608	1.19901
CNAG_00115	786	720	1.09167
CNAG_00117	769	759	1.01318
CNAG_00118	207	288	0.71875
CNAG_00120	339	501	0.676647
CNAG_00121	793	921	0.861021
CNAG_00122	595	327	1.81957
CNAG_00123	28	128	0.21875
CNAG_00126	511	525	0.973333
CNAG_00127	310	523	0.592734
CNAG_00132	12	79	0.151899
CNAG_00134	475	551	0.862069
CNAG_00136	2396	1187	2.01853
CNAG_00137	488	695	0.702158
CNAG_00139	578	677	0.853767
CNAG_00140	985	1001	0.984016
CNAG_00144	91	119	0.764706
CNAG_00146	603	350	1.72286
CNAG_00152	372	493	0.754564
CNAG_00154	573	476	1.20378
CNAG_00155	4	5	0.8
CNAG_00156	991	724	1.36878
CNAG_00158	340	434	0.78341
CNAG_00161	136	185	0.735135
CNAG_00162	296	362	0.81768
CNAG_00163	323	548	0.589416
CNAG_00164	7	38	0.184211
CNAG_00165	776	806	0.962779
CNAG_00166	827	640	1.29219
CNAG_00174	488	327	1.49235
CNAG_00176	1244	1067	1.16589
CNAG_00178	117	426	0.274648
CNAG_00181	318	335	0.949254
CNAG_00183	414	427	0.969555
CNAG_00186	101	184	0.548913
CNAG_00188	315	376	0.837766
CNAG_00193	1798	1474	1.21981
CNAG_00195	374	585	0.639316
CNAG_00232	399	611	0.653028
CNAG_00235	865	1390	0.622302
CNAG_00239	671	209	3.21053
CNAG_00242	5	21	0.238095
CNAG_00243	283	254	1.11417
CNAG_00246	792	555	1.42703
CNAG_00248	168	225	0.746667
CNAG_00252	156	241	0.647303
CNAG_00255	251	359	0.699164
CNAG_00257	386	878	0.439636
CNAG_00258	426	553	0.770344
CNAG_00260	697	661	1.05446
CNAG_00262	9	65	0.138462
CNAG_00263	198	415	0.477108
CNAG_00264	439	583	0.753002
CNAG_00266	267	284	0.940141
CNAG_00268	1692	1500	1.128
CNAG_00271	315	512	0.615234
CNAG_00273	150	185	0.810811
CNAG_00275	641	738	0.868564
CNAG_00278	450	451	0.997783
CNAG_00283	39	62	0.629032
CNAG_00285	207	369	0.560976
CNAG_00286	1148	1249	0.919135
CNAG_00289	279	230	1.21304
CNAG_00293	490	699	0.701001
CNAG_00295	1	1	1
CNAG_00300	732	909	0.805281
CNAG_00303	15	39	0.384615
CNAG_00304	233	326	0.714724
CNAG_00307	176	291	0.604811
CNAG_00308	436	210	2.07619
CNAG_00311	1066	989	1.07786
CNAG_00314	143	193	0.740933
CNAG_00316	440	644	0.68323
CNAG_00317	611	473	1.29175
CNAG_00319	592	650	0.910769
CNAG_00322	419	327	1.28135
CNAG_00323	3	15	0.2
CNAG_00327	181	151	1.19868
CNAG_00329	439	426	1.03052
CNAG_00331	17	26	0.653846
CNAG_00332	162	196	0.826531
CNAG_00335	610	634	0.962145
CNAG_00336	39	719	0.054242
CNAG_00342	793	377	2.10345
CNAG_00343	314	290	1.08276
CNAG_00345	771	690	1.11739
CNAG_00347	851	457	1.86214
CNAG_00353	133	203	0.655172
CNAG_00354	894	1234	0.724473
CNAG_00358	413	789	0.523447
CNAG_00359	254	399	0.636591
CNAG_00360	385	502	0.766932
CNAG_00361	950	868	1.09447
CNAG_00362	441	656	0.672256
CNAG_00364	511	649	0.787365
CNAG_00367	150	375	0.4
CNAG_00369	369	655	0.563359
CNAG_00370	446	599	0.744574
CNAG_00372	971	1014	0.957594
CNAG_00375	847	833	1.01681
CNAG_00377	2044	1352	1.51183
CNAG_00384	176	209	0.842105
CNAG_00388	751	496	1.51411
CNAG_00391	331	391	0.846547
CNAG_00393	522	305	1.71148
CNAG_00395	115	452	0.254425
CNAG_00396	566	484	1.16942
CNAG_00398	471	336	1.40179
CNAG_00399	395	556	0.710432
CNAG_00401	321	493	0.651116
CNAG_00402	2898	1525	1.90033
CNAG_00404	226	76	2.97368
CNAG_00406	950	375	2.53333
CNAG_00407	1146	817	1.40269
CNAG_00408	427	342	1.24854
CNAG_00410	1388	867	1.60092
CNAG_00412	8	41	0.195122
CNAG_00413	1255	1118	1.12254
CNAG_00416	149	271	0.549816
CNAG_00417	1288	1455	0.885223
CNAG_00418	1149	1308	0.87844
CNAG_00419	14	138	0.101449
CNAG_00421	364	428	0.850467
CNAG_00423	227	293	0.774744
CNAG_00425	7	19	0.368421
CNAG_00426	930	491	1.89409
CNAG_00427	595	848	0.701651
CNAG_00429	785	582	1.3488
CNAG_00433	24	235	0.102128
CNAG_00434	608	734	0.828338
CNAG_00436	512	796	0.643216
CNAG_00437	169	263	0.642586
CNAG_00439	1063	968	1.09814
CNAG_00441	1480	1563	0.946897
CNAG_00443	33	49	0.673469
CNAG_00446	4	9	0.444444
CNAG_00447	1350	1443	0.935551
CNAG_00449	917	674	1.36053
CNAG_00455	972	642	1.51402
CNAG_00460	582	264	2.20455
CNAG_00461	859	1002	0.857285
CNAG_00465	161	328	0.490854
CNAG_00467	202	263	0.768061
CNAG_00469	268	379	0.707124
CNAG_00471	415	524	0.791985
CNAG_00473	268	274	0.978102
CNAG_00475	507	261	1.94253
CNAG_00482	839	875	0.958857
CNAG_00484	57	353	0.161473
CNAG_00485	117	196	0.596939
CNAG_00488	29	135	0.214815
CNAG_00490	338	295	1.14576
CNAG_00492	11	41	0.268293
CNAG_00493	118	373	0.316354
CNAG_00497	547	452	1.21018
CNAG_00499	469	463	1.01296
CNAG_00501	16	105	0.152381
CNAG_00503	629	581	1.08262
CNAG_00506	448	242	1.85124
CNAG_00507	5	17	0.294118
CNAG_00508	902	358	2.51955
CNAG_00509	1139	1237	0.920776
CNAG_00512	933	862	1.08237
CNAG_00514	553	402	1.37562
CNAG_00517	382	607	0.629325
CNAG_00521	80	262	0.305344
CNAG_00523	385	526	0.731939
CNAG_00526	5	38	0.131579
CNAG_00527	1369	1130	1.2115
CNAG_00531	679	774	0.877261
CNAG_00532	383	632	0.606013
CNAG_00534	267	461	0.579176
CNAG_00536	283	518	0.546332
CNAG_00538	251	419	0.599045
CNAG_00539	562	459	1.2244
CNAG_00541	37	262	0.141221
CNAG_00544	92	409	0.224939
CNAG_00547	611	1020	0.59902
CNAG_00549	9	243	0.037037
CNAG_00550	19	150	0.126667
CNAG_00551	1298	1396	0.929799
CNAG_00554	447	301	1.48505
CNAG_00555	292	474	0.616034
CNAG_00556	942	1065	0.884507
CNAG_00560	552	695	0.794245
CNAG_00562	563	805	0.699379
CNAG_00563	301	500	0.602
CNAG_00565	1653	1544	1.0706
CNAG_00567	460	712	0.646067
CNAG_00568	19	66	0.287879
CNAG_00570	984	927	1.06149
CNAG_00573	396	422	0.938389
CNAG_00574	218	620	0.351613
CNAG_00575	198	358	0.553073
CNAG_00576	511	537	0.951583
CNAG_00577	306	509	0.601179
CNAG_00580	1009	1590	0.634591
CNAG_00582	277	567	0.488536
CNAG_00585	577	587	0.982964
CNAG_00587	13	28	0.464286
CNAG_00588	7	21	0.333333
CNAG_00589	396	583	0.679245
CNAG_00591	6	25	0.24
CNAG_00592	291	183	1.59016
CNAG_00594	491	661	0.742814
CNAG_00595	101	261	0.386973
CNAG_00600	1088	944	1.15254
CNAG_00601	107	123	0.869919
CNAG_00602	927	1055	0.878673
CNAG_00603	607	739	0.82138
CNAG_00607	801	822	0.974453
CNAG_00609	331	620	0.533871
CNAG_00613	354	438	0.808219
CNAG_00615	133	89	1.49438
CNAG_00619	350	295	1.18644
CNAG_00623	513	453	1.13245
CNAG_00624	453	725	0.624828
CNAG_00625	284	685	0.414599
CNAG_00628	123	308	0.399351
CNAG_00632	339	479	0.707724
CNAG_00634	1031	684	1.50731
CNAG_00635	1348	762	1.76903
CNAG_00636	544	676	0.804734
CNAG_00638	581	704	0.825284
CNAG_00641	2111	1393	1.51543
CNAG_00644	436	341	1.27859
CNAG_00648	331	385	0.85974
CNAG_00649	1737	1180	1.47203
CNAG_00651	33	35	0.942857
CNAG_00652	266	352	0.755682
CNAG_00655	424	535	0.792523
CNAG_00657	1	3	0.333333
CNAG_00658	261	283	0.922261
CNAG_00660	364	345	1.05507
CNAG_00662	561	586	0.957338
CNAG_00666	2328	1017	2.28909
CNAG_00667	477	527	0.905123
CNAG_00668	781	995	0.784925
CNAG_00669	420	525	0.8
CNAG_00671	724	689	1.0508
CNAG_00674	237	215	1.10233
CNAG_00675	303	797	0.380176
CNAG_00680	548	776	0.706186
CNAG_00684	540	617	0.875203
CNAG_00686	790	864	0.914352
CNAG_00688	179	376	0.476064
CNAG_00691	305	331	0.92145
CNAG_00695	172	302	0.569536
CNAG_00697	906	1031	0.878758
CNAG_00699	197	112	1.75893
CNAG_00701	919	1118	0.822004
CNAG_00703	460	725	0.634483
CNAG_00704	639	529	1.20794
CNAG_00705	990	1176	0.841837
CNAG_00707	373	496	0.752016
CNAG_00709	549	387	1.4186
CNAG_00712	513	575	0.892174
CNAG_00715	225	400	0.5625
CNAG_00718	846	495	1.70909
CNAG_00719	861	904	0.952434
CNAG_00722	446	504	0.884921
CNAG_00726	7	19	0.368421
CNAG_00727	247	323	0.764706
CNAG_00728	49	124	0.395161
CNAG_00732	211	381	0.553806
CNAG_00735	510	485	1.05155
CNAG_00736	594	715	0.830769
CNAG_00737	373	375	0.994667
CNAG_00738	24	113	0.212389
CNAG_00740	1617	831	1.94585
CNAG_00743	1406	891	1.578
CNAG_00744	371	555	0.668468
CNAG_00748	274	187	1.46524
CNAG_00753	499	664	0.751506
CNAG_00754	1524	1318	1.1563
CNAG_00756	249	315	0.790476
CNAG_00759	9	69	0.130435
CNAG_00761	351	477	0.735849
CNAG_00765	273	265	1.03019
CNAG_00766	118	110	1.07273
CNAG_00768	459	412	1.11408
CNAG_00770	840	661	1.2708
CNAG_00771	417	585	0.712821
CNAG_00774	1254	845	1.48402
CNAG_00778	244	465	0.524731
CNAG_00780	592	193	3.06736
CNAG_00782	101	294	0.343537
CNAG_00783	364	513	0.709552
CNAG_00784	115	573	0.200698
CNAG_00786	254	338	0.751479
CNAG_00788	1412	1527	0.924689
CNAG_00789	24	638	0.0376175
CNAG_00791	160	120	1.33333
CNAG_00792	1250	868	1.44009
CNAG_00794	434	555	0.781982
CNAG_00795	6	3	2
CNAG_00796	1107	644	1.71894
CNAG_00797	1642	1462	1.12312
CNAG_00798	7	59	0.118644
CNAG_00800	78	102	0.764706
CNAG_00801	11	151	0.0728477
CNAG_00803	288	354	0.813559
CNAG_00805	454	373	1.21716
CNAG_00808	361	545	0.662385
CNAG_00810	564	521	1.08253
CNAG_00811	762	741	1.02834
CNAG_00812	1034	826	1.25182
CNAG_00814	85	565	0.150442
CNAG_00816	310	583	0.531732
CNAG_00818	420	379	1.10818
CNAG_00819	293	622	0.471061
CNAG_00821	378	586	0.645051
CNAG_00823	17	292	0.0582192
CNAG_00826	33	11	3
CNAG_00828	57	47	1.21277
CNAG_00829	435	603	0.721393
CNAG_00832	204	306	0.666667
CNAG_00833	13	37	0.351351
CNAG_00836	323	342	0.944444
CNAG_00838	111	100	1.11
CNAG_00839	163	116	1.40517
CNAG_00841	272	253	1.0751
CNAG_00846	481	428	1.12383
CNAG_00848	665	723	0.919779
CNAG_00850	104	44	2.36364
CNAG_00851	107	115	0.930435
CNAG_00854	498	612	0.813725
CNAG_00862	374	379	0.986807
CNAG_00864	6	31	0.193548
CNAG_00865	1	3	0.333333
CNAG_00866	825	847	0.974026
CNAG_00867	11	28	0.392857
CNAG_00869	750	374	2.00535
CNAG_00870	17	30	0.566667
CNAG_00872	338	769	0.439532
CNAG_00874	1521	1075	1.41488
CNAG_00875	289	471	0.613588
CNAG_00876	103	219	0.47032
CNAG_00878	15	321	0.046729
CNAG_00884	623	629	0.990461
CNAG_00886	1236	1505	0.821262
CNAG_00887	5	25	0.2
CNAG_00890	586	488	1.20082
CNAG_00892	124	225	0.551111
CNAG_00894	242	360	0.672222
CNAG_00896	169	285	0.592982
CNAG_00897	1211	1033	1.17231
CNAG_00898	3	9	0.333333
CNAG_00899	996	516	1.93023
CNAG_00901	234	339	0.690265
CNAG_00907	23	44	0.522727
CNAG_00908	43	68	0.632353
CNAG_00915	11	31	0.354839
CNAG_00919	912	1247	0.731355
CNAG_00920	270	368	0.733696
CNAG_00922	369	382	0.965969
CNAG_00925	11	20	0.55
CNAG_00926	344	338	1.01775
CNAG_00928	595	674	0.882789
CNAG_00930	1291	1843	0.700488
CNAG_00931	140	259	0.540541
CNAG_00933	123	97	1.26804
CNAG_00934	590	607	0.971993
CNAG_00935	1064	1218	0.873563
CNAG_00936	499	319	1.56426
CNAG_00938	249	251	0.992032
CNAG_00941	43	777	0.0553411
CNAG_00961	178	386	0.46114
CNAG_00964	7	128	0.0546875
CNAG_00966	675	683	0.988287
CNAG_00968	241	262	0.919847
CNAG_00971	251	250	1.004
CNAG_00972	491	732	0.670765
CNAG_00974	1	17	0.0588235
CNAG_00975	205	193	1.06218
CNAG_00978	1035	842	1.22922
CNAG_00980	55	507	0.108481
CNAG_00983	464	355	1.30704
CNAG_00985	151	373	0.404826
CNAG_00987	435	598	0.727425
CNAG_00989	592	420	1.40952
CNAG_00991	670	930	0.72043
CNAG_00992	1406	1295	1.08571
CNAG_00996	1043	847	1.2314
CNAG_00998	525	517	1.01547
CNAG_00999	309	299	1.03344
CNAG_01002	100	299	0.334448
CNAG_01005	388	453	0.856512
CNAG_01006	314	364	0.862637
CNAG_01007	302	483	0.625259
CNAG_01010	453	717	0.631799
CNAG_01012	296	249	1.18876
CNAG_01014	500	571	0.875657
CNAG_01016	256	256	1
CNAG_01017	417	501	0.832335
CNAG_01021	859	743	1.15612
CNAG_01022	308	318	0.968553
CNAG_01023	1014	987	1.02736
CNAG_01025	535	325	1.64615
CNAG_01027	1369	1070	1.27944
CNAG_01029	641	480	1.33542
CNAG_01032	33	76	0.434211
CNAG_01035	716	838	0.854415
CNAG_01037	86	352	0.244318
CNAG_01039	1230	1209	1.01737
CNAG_01040	116	123	0.943089
CNAG_01041	52	205	0.253659
CNAG_01043	457	808	0.565594
CNAG_01044	333	612	0.544118
CNAG_01045	781	805	0.970186
CNAG_01046	797	787	1.01271
CNAG_01049	215	389	0.552699
CNAG_01051	709	849	0.8351
CNAG_01052	411	396	1.03788
CNAG_01054	685	419	1.63484
CNAG_01058	534	474	1.12658
CNAG_01060	779	1291	0.603408
CNAG_01064	235	454	0.517621
CNAG_01070	17	38	0.447368
CNAG_01071	322	475	0.677895
CNAG_01073	36	328	0.109756
CNAG_01076	11	33	0.333333
CNAG_01078	572	605	0.945455
CNAG_01080	73	94	0.776596
CNAG_01081	37	211	0.175355
CNAG_01082	442	427	1.03513
CNAG_01086	170	257	0.661479
CNAG_01089	344	422	0.815166
CNAG_01092	698	709	0.984485
CNAG_01096	332	415	0.8
CNAG_01100	524	431	1.21578
CNAG_01101	760	831	0.914561
CNAG_01102	558	593	0.940978
CNAG_01104	660	774	0.852713
CNAG_01107	495	713	0.69425
CNAG_01109	440	548	0.80292
CNAG_01111	674	756	0.891534
CNAG_01113	320	489	0.654397
CNAG_01115	609	1117	0.54521
CNAG_01117	3169	2968	1.06772
CNAG_01118	34	91	0.373626
CNAG_01119	1617	1691	0.956239
CNAG_01120	1349	1308	1.03135
CNAG_01121	22	133	0.165414
CNAG_01124	179	180	0.994444
CNAG_01126	2659	1697	1.56688
CNAG_01127	164	426	0.384977
CNAG_01128	514	464	1.10776
CNAG_01129	673	518	1.29923
CNAG_01130	1965	1099	1.78799
CNAG_01131	45	178	0.252809
CNAG_01134	494	373	1.3244
CNAG_01135	53	202	0.262376
CNAG_01141	458	437	1.04805
CNAG_01142	519	473	1.09725
CNAG_01144	1210	1300	0.930769
CNAG_01146	1524	1278	1.19249
CNAG_01148	1150	1332	0.863363
CNAG_01149	1322	637	2.07535
CNAG_01151	220	353	0.623229
CNAG_01153	497	596	0.833893
CNAG_01154	34	226	0.150442
CNAG_01156	850	1079	0.787766
CNAG_01157	551	737	0.747626
CNAG_01159	963	953	1.01049
CNAG_01162	277	506	0.547431
CNAG_01164	1852	1686	1.09846
CNAG_01166	345	397	0.869018
CNAG_01168	1382	1396	0.989971
CNAG_01170	505	753	0.670651
CNAG_01172	653	477	1.36897
CNAG_01175	286	594	0.481481
CNAG_01177	350	327	1.07034
CNAG_01178	767	429	1.78788
CNAG_01180	148	221	0.669683
CNAG_01182	1000	1097	0.911577
CNAG_01184	344	473	0.727273
CNAG_01187	759	715	1.06154
CNAG_01188	467	400	1.1675
CNAG_01190	498	550	0.905455
CNAG_01192	140	247	0.566802
CNAG_01193	6	137	0.0437956
CNAG_01196	491	706	0.695467
CNAG_01197	859	994	0.864185
CNAG_01199	1437	770	1.86623
CNAG_01201	200	327	0.611621
CNAG_01207	50	81	0.617284
CNAG_01208	490	647	0.757342
CNAG_01210	9	1	9
CNAG_01213	1018	1004	1.01394
CNAG_01216	682	583	1.16981
CNAG_01217	997	1007	0.99007
CNAG_01220	350	327	1.07034
CNAG_01222	806	585	1.37778
CNAG_01228	369	387	0.953488
CNAG_01233	1094	744	1.47043
CNAG_01236	939	1017	0.923304
CNAG_01237	366	362	1.01105
CNAG_01239	394	239	1.64854
CNAG_01241	563	655	0.859542
CNAG_01245	280	885	0.316384
CNAG_01246	394	726	0.5427
CNAG_01248	727	589	1.2343
CNAG_01249	656	397	1.65239
CNAG_01251	1856	1202	1.54409
CNAG_01252	102	70	1.45714
CNAG_01253	311	470	0.661702
CNAG_01255	738	640	1.15312
CNAG_01256	103	152	0.677632
CNAG_01257	342	252	1.35714
CNAG_01261	1686	1092	1.54396
CNAG_01262	132	310	0.425806
CNAG_01263	1291	1319	0.978772
CNAG_01265	214	407	0.525799
CNAG_01266	1474	1316	1.12006
CNAG_01267	398	449	0.886414
CNAG_01268	7	13	0.538462
CNAG_01270	1098	1208	0.90894
CNAG_01271	763	821	0.929354
CNAG_01273	558	716	0.77933
CNAG_01275	512	798	0.641604
CNAG_01277	348	935	0.372193
CNAG_01278	716	1153	0.620989
CNAG_01279	407	578	0.704152
CNAG_01281	185	532	0.347744
CNAG_01282	817	736	1.11005
CNAG_01285	801	793	1.01009
CNAG_01286	160	234	0.683761
CNAG_01287	1370	1444	0.948753
CNAG_01288	698	617	1.13128
CNAG_01290	205	237	0.864979
CNAG_01292	269	309	0.87055
CNAG_01296	734	751	0.977364
CNAG_01298	1277	1143	1.11724
CNAG_01299	5	5	1
CNAG_01302	303	394	0.769036
CNAG_01305	1624	1680	0.966667
CNAG_01306	310	402	0.771144
CNAG_01308	622	480	1.29583
CNAG_01310	616	642	0.959502
CNAG_01314	498	522	0.954023
CNAG_01317	511	482	1.06017
CNAG_01318	731	838	0.872315
CNAG_01319	305	536	0.56903
CNAG_01321	400	648	0.617284
CNAG_01323	470	608	0.773026
CNAG_01332	476	840	0.566667
CNAG_01334	1245	608	2.0477
CNAG_01335	438	443	0.988713
CNAG_01337	461	435	1.05977
CNAG_01339	1618	883	1.83239
CNAG_01340	1328	1054	1.25996
CNAG_01343	294	139	2.11511
CNAG_01345	690	769	0.897269
CNAG_01346	330	543	0.607735
CNAG_01348	352	478	0.736402
CNAG_01350	483	566	0.853357
CNAG_01352	625	1125	0.555556
CNAG_01354	1132	995	1.13769
CNAG_01355	535	660	0.810606
CNAG_01358	11	24	0.458333
CNAG_01360	1852	705	2.62695
CNAG_01362	1247	1212	1.02888
CNAG_01363	645	594	1.08586
CNAG_01365	851	356	2.39045
CNAG_01367	91	318	0.286164
CNAG_01369	196	314	0.624204
CNAG_01370	5	154	0.0324675
CNAG_01371	433	601	0.720466
CNAG_01373	633	696	0.909483
CNAG_01375	1169	475	2.46105
CNAG_01379	199	348	0.571839
CNAG_01381	533	453	1.1766
CNAG_01386	42	132	0.318182
CNAG_01389	622	306	2.03268
CNAG_01391	1045	872	1.19839
CNAG_01395	790	745	1.0604
CNAG_01398	1848	1216	1.51974
CNAG_01400	1040	1138	0.913884
CNAG_01402	884	990	0.892929
CNAG_01403	446	589	0.757216
CNAG_01414	577	553	1.0434
CNAG_01416	413	477	0.865828
CNAG_01418	361	485	0.74433
CNAG_01419	390	529	0.73724
CNAG_01420	234	327	0.715596
CNAG_01423	1100	920	1.19565
CNAG_01425	221	148	1.49324
CNAG_01426	531	870	0.610345
CNAG_01429	410	689	0.595065
CNAG_01430	464	322	1.44099
CNAG_01432	979	1094	0.894881
CNAG_01436	388	479	0.810021
CNAG_01438	1383	558	2.47849
CNAG_01440	386	203	1.90148
CNAG_01442	975	692	1.40896
CNAG_01443	212	145	1.46207
CNAG_01445	301	198	1.5202
CNAG_01446	200	390	0.512821
CNAG_01448	544	314	1.73248
CNAG_01451	212	320	0.6625
CNAG_01454	188	338	0.556213
CNAG_01461	142	356	0.398876
CNAG_01463	191	290	0.658621
CNAG_01464	834	687	1.21397
CNAG_01465	189	330	0.572727
CNAG_01466	176	299	0.588629
CNAG_01468	331	401	0.825436
CNAG_01470	680	770	0.883117
CNAG_01472	321	466	0.688841
CNAG_01473	15	26	0.576923
CNAG_01474	35	145	0.241379
CNAG_01475	1049	1340	0.782836
CNAG_01477	1179	725	1.62621
CNAG_01479	332	416	0.798077
CNAG_01480	555	727	0.763411
CNAG_01483	350	534	0.655431
CNAG_01485	932	1127	0.826974
CNAG_01491	311	527	0.590133
CNAG_01493	83	176	0.471591
CNAG_01497	24	286	0.0839161
CNAG_01499	33	298	0.110738
CNAG_01501	144	310	0.464516
CNAG_01504	264	515	0.512621
CNAG_01506	5	38	0.131579
CNAG_01508	1056	715	1.47692
CNAG_01510	1329	872	1.52408
CNAG_01514	1	7	0.142857
CNAG_01519	99	71	1.39437
CNAG_01521	170	160	1.0625
CNAG_01523	969	1007	0.962264
CNAG_01524	319	573	0.556719
CNAG_01526	1118	849	1.31684
CNAG_01527	11	9	1.22222
CNAG_01528	526	596	0.88255
CNAG_01529	300	482	0.622407
CNAG_01531	451	344	1.31105
CNAG_01535	795	913	0.870756
CNAG_01536	1041	681	1.52863
CNAG_01538	11	53	0.207547
CNAG_01539	1188	1567	0.758137
CNAG_01540	219	121	1.80992
CNAG_01542	111	152	0.730263
CNAG_01544	1289	1285	1.00311
CNAG_01546	323	354	0.912429
CNAG_01548	968	1120	0.864286
CNAG_01551	322	320	1.00625
CNAG_01554	602	553	1.08861
CNAG_01556	854	627	1.36204
CNAG_01559	940	640	1.46875
CNAG_01560	27	25	1.08
CNAG_01563	795	1032	0.770349
CNAG_01566	623	484	1.28719
CNAG_01568	1393	1342	1.038
CNAG_01570	19	60	0.316667
CNAG_01573	763	790	0.965823
CNAG_01577	1376	1556	0.884319
CNAG_01579	729	483	1.50932
CNAG_01583	495	559	0.88551
CNAG_01584	57	98	0.581633
CNAG_01586	726	872	0.832569
CNAG_01591	1172	558	2.10036
CNAG_01593	855	911	0.938529
CNAG_01595	451	434	1.03917
CNAG_01597	397	475	0.835789
CNAG_01599	442	219	2.01826
CNAG_01601	126	119	1.05882
CNAG_01602	177	295	0.6
CNAG_01603	185	730	0.253425
CNAG_01604	102	148	0.689189
CNAG_01607	357	389	0.917738
CNAG_01610	956	639	1.49609
CNAG_01613	756	603	1.25373
CNAG_01616	1010	1099	0.919017
CNAG_01620	489	559	0.874776
CNAG_01622	300	513	0.584795
CNAG_01624	92	362	0.254144
CNAG_01626	580	610	0.95082
CNAG_01628	414	550	0.752727
CNAG_01630	790	531	1.48776
CNAG_01632	360	450	0.8
CNAG_01636	366	469	0.780384
CNAG_01638	385	565	0.681416
CNAG_01640	447	1196	0.373746
CNAG_01642	563	809	0.695921
CNAG_01644	608	762	0.7979
CNAG_01646	500	587	0.851789
CNAG_01648	373	556	0.670863
CNAG_01649	883	694	1.27233
CNAG_01651	17	84	0.202381
CNAG_01652	274	638	0.429467
CNAG_01653	15	24	0.625
CNAG_01654	416	482	0.863071
CNAG_01655	1759	1095	1.60639
CNAG_01656	342	280	1.22143
CNAG_01659	376	424	0.886792
CNAG_01663	356	493	0.72211
CNAG_01665	330	368	0.896739
CNAG_01668	13	34	0.382353
CNAG_01669	583	470	1.24043
CNAG_01671	17	5	3.4
CNAG_01673	708	618	1.14563
CNAG_01674	14	22	0.636364
CNAG_01676	985	808	1.21906
CNAG_01678	602	1035	0.581643
CNAG_01680	5	7	0.714286
CNAG_01682	1458	1633	0.892835
CNAG_01686	366	499	0.733467
CNAG_01689	3	24	0.125
CNAG_01691	232	560	0.414286
CNAG_01692	458	595	0.769748
CNAG_01695	11	131	0.0839695
CNAG_01697	467	689	0.677794
CNAG_01698	117	282	0.414894
CNAG_01699	197	349	0.56447
CNAG_01703	52	364	0.142857
CNAG_01704	1636	1565	1.04537
CNAG_01706	1	41	0.0243902
CNAG_01707	221	514	0.429961
CNAG_01709	1076	1223	0.879804
CNAG_01711	1256	1172	1.07167
CNAG_01713	324	535	0.605607
CNAG_01714	9	47	0.191489
CNAG_01715	1765	1299	1.35874
CNAG_01717	668	275	2.42909
CNAG_01720	401	235	1.70638
CNAG_01723	504	715	0.704895
CNAG_01725	29	122	0.237705
CNAG_01730	309	337	0.916914
CNAG_01731	219	411	0.532847
CNAG_01733	1203	1103	1.09066
CNAG_01735	90	329	0.273556
CNAG_01736	123	299	0.411371
CNAG_01738	784	347	2.25937
CNAG_01740	776	768	1.01042
CNAG_01742	1	15	0.0666667
CNAG_01744	1027	881	1.16572
CNAG_01746	178	270	0.659259
CNAG_01749	177	439	0.403189
CNAG_01750	1779	1149	1.5483
CNAG_01752	773	853	0.906213
CNAG_01754	905	762	1.18766
CNAG_01756	406	582	0.697595
CNAG_01758	13	66	0.19697
CNAG_01760	21	236	0.088983
CNAG_01761	603	739	0.815968
CNAG_01763	284	335	0.847761
CNAG_01765	354	552	0.641304
CNAG_01769	1009	884	1.1414
CNAG_01770	1190	918	1.2963
CNAG_01772	776	829	0.936068
CNAG_01777	448	356	1.25843
CNAG_01779	410	310	1.32258
CNAG_01781	13	373	0.0348526
CNAG_01787	72	205	0.35122
CNAG_01788	551	955	0.576963
CNAG_01790	403	483	0.834369
CNAG_01791	862	892	0.966368
CNAG_01795	238	172	1.38372
CNAG_01797	564	601	0.938436
CNAG_01799	372	490	0.759184
CNAG_01802	643	386	1.6658
CNAG_01808	520	696	0.747126
CNAG_01810	295	320	0.921875
CNAG_01812	556	548	1.0146
CNAG_01815	571	335	1.70448
CNAG_01817	860	806	1.067
CNAG_01819	687	747	0.919679
CNAG_01823	530	823	0.643985
CNAG_01825	302	169	1.78698
CNAG_01826	579	715	0.80979
CNAG_01827	7	31	0.225806
CNAG_01832	290	441	0.657596
CNAG_01834	474	693	0.683983
CNAG_01835	250	549	0.455373
CNAG_01837	1209	848	1.42571
CNAG_01839	464	668	0.694611
CNAG_01842	1076	781	1.37772
CNAG_01844	229	203	1.12808
CNAG_01845	1759	1408	1.24929
CNAG_01847	44	168	0.261905
CNAG_01848	1151	1051	1.09515
CNAG_01849	15	75	0.2
CNAG_01850	1762	1027	1.71568
CNAG_01852	1036	1125	0.920889
CNAG_01854	1890	2019	0.936107
CNAG_01857	5	5	1
CNAG_01859	555	571	0.971979
CNAG_01862	5	11	0.454545
CNAG_01866	38	214	0.17757
CNAG_01867	820	812	1.00985
CNAG_01869	404	541	0.746765
CNAG_01870	638	716	0.891061
CNAG_01874	280	287	0.97561
CNAG_01876	397	362	1.09669
CNAG_01878	467	510	0.915686
CNAG_01879	456	288	1.58333
CNAG_01880	623	379	1.6438
CNAG_01882	289	213	1.35681
CNAG_01883	11	181	0.0607735
CNAG_01885	640	533	1.20075
CNAG_01889	183	170	1.07647
CNAG_01892	642	487	1.31828
CNAG_01894	1023	917	1.11559
CNAG_01896	971	1176	0.82568
CNAG_01897	1607	1313	1.22391
CNAG_01898	802	889	0.902137
CNAG_01900	487	492	0.989837
CNAG_01901	7	35	0.2
CNAG_01903	1186	476	2.4916
CNAG_01905	1641	1117	1.46911
CNAG_01912	1203	1174	1.0247
CNAG_01914	418	554	0.754513
CNAG_01915	1028	1235	0.832389
CNAG_01917	254	171	1.48538
CNAG_01919	352	341	1.03226
CNAG_01921	38	62	0.612903
CNAG_01923	732	702	1.04274
CNAG_01924	240	336	0.714286
CNAG_01925	28	17	1.64706
CNAG_01926	271	269	1.00743
CNAG_01927	181	241	0.751037
CNAG_01930	325	606	0.536304
CNAG_01931	5	20	0.25
CNAG_01936	21	31	0.677419
CNAG_01937	5	48	0.104167
CNAG_01940	180	285	0.631579
CNAG_01942	125	178	0.702247
CNAG_01944	5	6	0.833333
CNAG_01945	7	39	0.179487
CNAG_01950	483	602	0.802326
CNAG_01953	78	231	0.337662
CNAG_01954	15	13	1.15385
CNAG_01957	641	660	0.971212
CNAG_01960	13	78	0.166667
CNAG_01962	359	459	0.782135
CNAG_01964	80	281	0.284698
CNAG_01965	40	21	1.90476
CNAG_01969	3	90	0.0333333
CNAG_01971	4	1	4
CNAG_01972	44	420	0.104762
CNAG_01973	1027	771	1.33204
CNAG_01975	712	568	1.25352
CNAG_01977	3	30	0.1
CNAG_01978	166	230	0.721739
CNAG_01980	1	1	1
CNAG_01981	1062	838	1.2673
CNAG_01984	980	1049	0.934223
CNAG_01986	304	410	0.741463
CNAG_01988	2082	1065	1.95493
CNAG_01990	734	999	0.734735
CNAG_01992	14	43	0.325581
CNAG_01994	1	44	0.0227273
CNAG_01996	364	280	1.3
CNAG_02001	913	452	2.01991
CNAG_02005	19	11	1.72727
CNAG_02007	769	902	0.85255
CNAG_02010	91	300	0.303333
CNAG_02013	103	379	0.271768
CNAG_02021	347	492	0.705285
CNAG_02022	722	792	0.911616
CNAG_02023	5	117	0.042735
CNAG_02025	655	810	0.808642
CNAG_02027	207	211	0.981043
CNAG_02028	839	395	2.12405
CNAG_02030	1586	1221	1.29894
CNAG_02033	338	280	1.20714
CNAG_02035	723	850	0.850588
CNAG_02037	599	626	0.956869
CNAG_02039	37	29	1.27586
CNAG_02043	68	162	0.419753
CNAG_02045	35	29	1.2069
CNAG_02048	1273	1251	1.01759
CNAG_02049	70	132	0.530303
CNAG_02051	850	474	1.79325
CNAG_02052	13	17	0.764706
CNAG_02057	264	392	0.673469
CNAG_02059	320	625	0.512
CNAG_02060	538	397	1.35516
CNAG_02062	14	317	0.044164
CNAG_02066	9	103	0.0873786
CNAG_02068	791	510	1.55098
CNAG_02071	830	671	1.23696
CNAG_02073	347	690	0.502899
CNAG_02075	526	525	1.0019
CNAG_02078	655	632	1.03639
CNAG_02079	1916	1099	1.7434
CNAG_02080	604	656	0.920732
CNAG_02082	143	286	0.5
CNAG_02083	19	38	0.5
CNAG_02084	910	896	1.01562
CNAG_02086	745	904	0.824115
CNAG_02087	19	46	0.413043
CNAG_02088	618	802	0.770574
CNAG_02089	78	83	0.939759
CNAG_02090	299	425	0.703529
CNAG_02091	1182	1285	0.919844
CNAG_02092	703	528	1.33144
CNAG_02094	672	732	0.918033
CNAG_02095	1038	964	1.07676
CNAG_02096	174	252	0.690476
CNAG_02100	3662	2826	1.29582
CNAG_02101	317	368	0.861413
CNAG_02103	23	234	0.0982906
CNAG_02104	178	170	1.04706
CNAG_02106	513	585	0.876923
CNAG_02110	1619	975	1.66051
CNAG_02112	189	361	0.523546
CNAG_02116	162	240	0.675
CNAG_02117	634	590	1.07458
CNAG_02119	225	523	0.43021
CNAG_02122	506	736	0.6875
CNAG_02124	172	232	0.741379
CNAG_02125	9	26	0.346154
CNAG_02128	672	830	0.809639
CNAG_02129	1644	1273	1.29144
CNAG_02130	1292	1707	0.756883
CNAG_02132	113	104	1.08654
CNAG_02134	1400	1344	1.04167
CNAG_02138	484	484	1
CNAG_02139	799	700	1.14143
CNAG_02140	404	512	0.789062
CNAG_02143	84	124	0.677419
CNAG_02145	400	609	0.656814
CNAG_02148	331	469	0.705757
CNAG_02150	115	205	0.560976
CNAG_02151	739	451	1.63858
CNAG_02154	590	438	1.34703
CNAG_02155	3	10	0.3
CNAG_02157	334	227	1.47137
CNAG_02159	48	487	0.0985626
CNAG_02160	20	56	0.357143
CNAG_02161	1200	869	1.3809
CNAG_02163	431	207	2.08213
CNAG_02165	716	384	1.86458
CNAG_02167	806	207	3.89372
CNAG_02170	81	121	0.669421
CNAG_02173	350	252	1.38889
CNAG_02175	1724	842	2.04751
CNAG_02176	113	880	0.128409
CNAG_02177	757	1176	0.643707
CNAG_02178	793	621	1.27697
CNAG_02179	496	456	1.08772
CNAG_02183	883	960	0.919792
CNAG_02186	204	227	0.898678
CNAG_02189	1226	960	1.27708
CNAG_02191	314	354	0.887006
CNAG_02192	7	34	0.205882
CNAG_02194	918	420	2.18571
CNAG_02197	601	529	1.13611
CNAG_02201	428	165	2.59394
CNAG_02202	519	535	0.970093
CNAG_02204	694	521	1.33205
CNAG_02205	286	248	1.15323
CNAG_02207	119	324	0.367284
CNAG_02210	565	373	1.51475
CNAG_02213	1072	855	1.2538
CNAG_02215	262	334	0.784431
CNAG_02217	13	97	0.134021
CNAG_02218	323	368	0.877717
CNAG_02220	681	950	0.716842
CNAG_02222	552	473	1.16702
CNAG_02224	318	170	1.87059
CNAG_02226	41	142	0.288732
CNAG_02230	642	1013	0.633761
CNAG_02231	564	679	0.830633
CNAG_02233	621	784	0.792092
CNAG_02235	351	855	0.410526
CNAG_02237	1917	1588	1.20718
CNAG_02240	1190	1187	1.00253
CNAG_02253	1	3	0.333333
CNAG_02255	17	36	0.472222
CNAG_02258	292	931	0.313641
CNAG_02261	491	614	0.799674
CNAG_02263	472	691	0.683068
CNAG_02268	385	340	1.13235
CNAG_02269	410	294	1.39456
CNAG_02281	889	547	1.62523
CNAG_02282	477	577	0.82669
CNAG_02285	499	697	0.715925
CNAG_02287	348	448	0.776786
CNAG_02290	754	646	1.16718
CNAG_02293	429	487	0.880903
CNAG_02295	41	121	0.338843
CNAG_02298	728	597	1.21943
CNAG_02301	1384	1406	0.984353
CNAG_02302	24	136	0.176471
CNAG_02304	244	328	0.743902
CNAG_02306	459	612	0.75
CNAG_02307	277	534	0.518727
CNAG_02308	391	560	0.698214
CNAG_02310	468	717	0.65272
CNAG_02313	181	364	0.497253
CNAG_02314	228	299	0.762542
CNAG_02315	838	936	0.895299
CNAG_02318	523	286	1.82867
CNAG_02321	5	9	0.555556
CNAG_02323	249	1227	0.202934
CNAG_02326	1294	1146	1.12914
CNAG_02327	1074	1053	1.01994
CNAG_02328	1578	1060	1.48868
CNAG_02331	640	818	0.782396
CNAG_02333	214	351	0.609687
CNAG_02335	971	1324	0.733384
CNAG_02337	478	569	0.84007
CNAG_02338	691	1206	0.572968
CNAG_02339	5	5	1
CNAG_02340	256	388	0.659794
CNAG_02342	208	340	0.611765
CNAG_02343	275	403	0.682382
CNAG_02345	170	384	0.442708
CNAG_02348	297	306	0.970588
CNAG_02349	136	162	0.839506
CNAG_02351	260	418	0.62201
CNAG_02354	956	685	1.39562
CNAG_02356	369	305	1.20984
CNAG_02358	421	474	0.888186
CNAG_02364	112	504	0.222222
CNAG_02366	498	667	0.746627
CNAG_02367	547	776	0.704897
CNAG_02368	430	631	0.681458
CNAG_02371	317	328	0.966463
CNAG_02373	633	570	1.11053
CNAG_02375	305	553	0.551537
CNAG_02378	617	749	0.823765
CNAG_02381	7	11	0.636364
CNAG_02383	344	547	0.628885
CNAG_02386	256	482	0.53112
CNAG_02393	1060	847	1.25148
CNAG_02394	458	539	0.849722
CNAG_02397	102	133	0.766917
CNAG_02398	138	431	0.320186
CNAG_02401	778	689	1.12917
CNAG_02404	1425	1363	1.04549
CNAG_02405	57	104	0.548077
CNAG_02407	475	510	0.931373
CNAG_02408	229	205	1.11707
CNAG_02409	267	348	0.767241
CNAG_02413	445	579	0.768566
CNAG_02415	759	529	1.43478
CNAG_02418	1590	1496	1.06283
CNAG_02422	270	353	0.764873
CNAG_02424	437	686	0.637026
CNAG_02426	1928	1075	1.79349
CNAG_02427	113	204	0.553922
CNAG_02428	879	884	0.994344
CNAG_02431	289	445	0.649438
CNAG_02433	160	488	0.327869
CNAG_02437	2771	1789	1.54891
CNAG_02439	97	145	0.668966
CNAG_02441	5	13	0.384615
CNAG_02443	242	359	0.674095
CNAG_02447	228	521	0.43762
CNAG_02448	5	120	0.0416667
CNAG_02449	686	647	1.06028
CNAG_02453	852	783	1.08812
CNAG_02458	1382	603	2.29187
CNAG_02460	625	300	2.08333
CNAG_02463	48	145	0.331034
CNAG_02466	236	344	0.686047
CNAG_02468	746	731	1.02052
CNAG_02470	257	354	0.725989
CNAG_02472	898	782	1.14834
CNAG_02475	119	214	0.556075
CNAG_02482	428	443	0.96614
CNAG_02483	17	35	0.485714
CNAG_02486	888	887	1.00113
CNAG_02487	387	351	1.10256
CNAG_02489	15	7	2.14286
CNAG_02491	409	547	0.747715
CNAG_02493	172	340	0.505882
CNAG_02495	520	757	0.686922
CNAG_02497	5	32	0.15625
CNAG_02498	721	299	2.41137
CNAG_02501	541	480	1.12708
CNAG_02502	1348	1026	1.31384
CNAG_02503	429	577	0.743501
CNAG_02504	166	287	0.578397
CNAG_02506	458	435	1.05287
CNAG_02507	970	957	1.01358
CNAG_02517	16	69	0.231884
CNAG_02520	757	485	1.56082
CNAG_02524	80	81	0.987654
CNAG_02526	5	5	1
CNAG_02527	270	339	0.79646
CNAG_02529	235	342	0.687134
CNAG_02534	547	325	1.68308
CNAG_02536	565	260	2.17308
CNAG_02538	7	5	1.4
CNAG_02540	366	632	0.579114
CNAG_02542	213	277	0.768953
CNAG_02544	9	8	1.125
CNAG_02547	2569	1789	1.436
CNAG_02549	79	415	0.190361
CNAG_02551	12	113	0.106195
CNAG_02554	58	458	0.126638
CNAG_02555	550	836	0.657895
CNAG_02557	74	342	0.216374
CNAG_02563	946	786	1.20356
CNAG_02565	1358	933	1.45552
CNAG_02568	2407	1086	2.21639
CNAG_02569	470	350	1.34286
CNAG_02574	726	570	1.27368
CNAG_02576	278	421	0.660333
CNAG_02577	657	518	1.26834
CNAG_02579	1372	522	2.62835
CNAG_02581	578	466	1.24034
CNAG_02582	1	1	1
CNAG_02583	525	690	0.76087
CNAG_02584	186	173	1.07514
CNAG_02587	178	184	0.967391
CNAG_02588	19	68	0.279412
CNAG_02590	71	41	1.73171
CNAG_02593	203	321	0.632399
CNAG_02594	46	333	0.138138
CNAG_02597	1092	1149	0.950392
CNAG_02598	3	67	0.0447761
CNAG_02600	36	188	0.191489
CNAG_02602	23	15	1.53333
CNAG_02606	290	274	1.05839
CNAG_02654	1283	732	1.75273
CNAG_02655	654	647	1.01082
CNAG_02658	56	108	0.518519
CNAG_02659	3	11	0.272727
CNAG_02662	574	442	1.29864
CNAG_02664	1204	1116	1.07885
CNAG_02670	872	713	1.223
CNAG_02671	1777	1834	0.96892
CNAG_02672	1117	1092	1.02289
CNAG_02674	837	366	2.28689
CNAG_02675	1802	1302	1.38402
CNAG_02678	120	520	0.230769
CNAG_02680	591	496	1.19153
CNAG_02681	83	338	0.245562
CNAG_02683	347	582	0.59622
CNAG_02685	45	179	0.251397
CNAG_02686	1469	1119	1.31278
CNAG_02688	122	102	1.19608
CNAG_02692	500	724	0.690608
CNAG_02694	11	150	0.0733333
CNAG_02696	788	769	1.02471
CNAG_02697	42	183	0.229508
CNAG_02698	1068	855	1.24912
CNAG_02700	1248	851	1.46651
CNAG_02701	830	586	1.41638
CNAG_02703	1154	1358	0.849779
CNAG_02705	42	120	0.35
CNAG_02708	185	202	0.915842
CNAG_02710	1416	1488	0.951613
CNAG_02711	35	254	0.137795
CNAG_02712	464	727	0.638239
CNAG_02714	721	950	0.758947
CNAG_02717	367	535	0.685981
CNAG_02721	1390	604	2.30132
CNAG_02723	459	615	0.746341
CNAG_02724	561	489	1.14724
CNAG_02726	805	623	1.29213
CNAG_02728	171	174	0.982759
CNAG_02729	185	156	1.1859
CNAG_02734	1	3	0.333333
CNAG_02736	1361	1379	0.986947
CNAG_02739	620	773	0.80207
CNAG_02740	404	308	1.31169
CNAG_02742	408	536	0.761194
CNAG_02744	241	809	0.297899
CNAG_02745	1486	1152	1.28993
CNAG_02750	116	293	0.395904
CNAG_02751	116	499	0.232465
CNAG_02752	447	484	0.923554
CNAG_02754	478	751	0.636485
CNAG_02756	169	234	0.722222
CNAG_02759	130	147	0.884354
CNAG_02760	684	604	1.13245
CNAG_02762	487	617	0.789303
CNAG_02763	1480	927	1.59655
CNAG_02766	666	317	2.10095
CNAG_02768	30	47	0.638298
CNAG_02770	219	374	0.585561
CNAG_02771	457	444	1.02928
CNAG_02773	1534	1162	1.32014
CNAG_02774	286	547	0.522852
CNAG_02775	694	847	0.819362
CNAG_02776	1	174	0.00574713
CNAG_02777	433	951	0.45531
CNAG_02780	773	894	0.864653
CNAG_02781	23	13	1.76923
CNAG_02783	348	452	0.769911
CNAG_02784	200	318	0.628931
CNAG_02787	379	474	0.799578
CNAG_02789	348	634	0.548896
CNAG_02792	541	896	0.603795
CNAG_02793	724	621	1.16586
CNAG_02795	490	436	1.12385
CNAG_02797	233	314	0.742038
CNAG_02798	424	514	0.824903
CNAG_02801	373	533	0.699812
CNAG_02803	208	549	0.378871
CNAG_02805	9	29	0.310345
CNAG_02809	745	682	1.09238
CNAG_02813	273	371	0.735849
CNAG_02815	657	1208	0.543874
CNAG_02817	556	790	0.703797
CNAG_02819	216	395	0.546835
CNAG_02820	536	319	1.68025
CNAG_02824	567	736	0.77038
CNAG_02825	1138	1116	1.01971
CNAG_02828	39	135	0.288889
CNAG_02833	253	405	0.624691
CNAG_02838	388	474	0.818565
CNAG_02841	46	376	0.12234
CNAG_02845	544	989	0.550051
CNAG_02848	15	234	0.0641026
CNAG_02849	10	5	2
CNAG_02850	1331	1803	0.738214
CNAG_02851	814	1115	0.730045
CNAG_02852	1242	967	1.28438
CNAG_02854	404	719	0.561892
CNAG_02855	612	651	0.940092
CNAG_02856	551	747	0.737617
CNAG_02859	350	372	0.94086
CNAG_02860	781	962	0.81185
CNAG_02861	360	419	0.859189
CNAG_02863	5	1	5
CNAG_02867	406	1513	0.268341
CNAG_02870	686	652	1.05215
CNAG_02871	169	244	0.692623
CNAG_02874	948	344	2.75581
CNAG_02877	213	218	0.977064
CNAG_02878	495	593	0.834739
CNAG_02881	298	484	0.615702
CNAG_02883	303	322	0.940994
CNAG_02885	792	858	0.923077
CNAG_02889	64	115	0.556522
CNAG_02891	414	551	0.751361
CNAG_02893	136	109	1.24771
CNAG_02895	990	693	1.42857
CNAG_02896	1125	938	1.19936
CNAG_02897	578	526	1.09886
CNAG_02902	79	167	0.473054
CNAG_02905	327	534	0.61236
CNAG_02907	517	744	0.694892
CNAG_02910	489	632	0.773734
CNAG_02912	1074	871	1.23307
CNAG_02915	924	568	1.62676
CNAG_02917	808	906	0.891832
CNAG_02918	1014	782	1.29668
CNAG_02919	101	252	0.400794
CNAG_02923	399	470	0.848936
CNAG_02924	197	281	0.701068
CNAG_02925	883	1028	0.858949
CNAG_02928	974	1067	0.91284
CNAG_02929	729	757	0.963012
CNAG_02930	715	492	1.45325
CNAG_02932	109	185	0.589189
CNAG_02933	346	420	0.82381
CNAG_02934	17	21	0.809524
CNAG_02935	340	277	1.22744
CNAG_02938	356	500	0.712
CNAG_02941	264	446	0.591928
CNAG_02942	330	591	0.558376
CNAG_02943	1408	1516	0.92876
CNAG_02944	51	120	0.425
CNAG_02950	524	513	1.02144
CNAG_02952	257	471	0.545648
CNAG_02955	243	251	0.968127
CNAG_02959	27	233	0.11588
CNAG_02963	407	391	1.04092
CNAG_02966	3	35	0.0857143
CNAG_02967	230	300	0.766667
CNAG_02969	151	160	0.94375
CNAG_02972	1	3	0.333333
CNAG_02975	405	469	0.863539
CNAG_02977	1418	1124	1.26157
CNAG_02978	48	63	0.761905
CNAG_02980	262	287	0.912892
CNAG_02982	1323	922	1.43492
CNAG_02985	517	711	0.727145
CNAG_02986	317	461	0.687636
CNAG_02987	1	3	0.333333
CNAG_02994	1875	1357	1.38172
CNAG_02996	81	274	0.29562
CNAG_02997	736	515	1.42913
CNAG_02999	183	293	0.624573
CNAG_03001	1255	1119	1.12154
CNAG_03004	432	498	0.86747
CNAG_03006	156	77	2.02597
CNAG_03007	315	451	0.698448
CNAG_03009	250	377	0.66313
CNAG_03012	209	414	0.504831
CNAG_03014	109	168	0.64881
CNAG_03015	311	596	0.521812
CNAG_03017	937	740	1.26622
CNAG_03018	282	249	1.13253
CNAG_03021	10	67	0.149254
CNAG_03023	1130	575	1.96522
CNAG_03026	347	330	1.05152
CNAG_03028	147	292	0.503425
CNAG_03032	541	755	0.716556
CNAG_03034	295	425	0.694118
CNAG_03036	78	773	0.100906
CNAG_03038	525	991	0.529768
CNAG_03040	939	1094	0.858318
CNAG_03044	256	367	0.697548
CNAG_03049	282	451	0.625277
CNAG_03051	191	147	1.29932
CNAG_03053	496	735	0.67483
CNAG_03055	317	541	0.585952
CNAG_03056	22	20	1.1
CNAG_03057	453	296	1.53041
CNAG_03059	108	370	0.291892
CNAG_03060	192	320	0.6
CNAG_03061	946	799	1.18398
CNAG_03063	734	1133	0.647838
CNAG_03065	376	750	0.501333
CNAG_03067	135	84	1.60714
CNAG_03069	221	424	0.521226
CNAG_03070	516	487	1.05955
CNAG_03071	179	358	0.5
CNAG_03072	1346	1505	0.894352
CNAG_03075	472	342	1.38012
CNAG_03076	3	80	0.0375
CNAG_03077	4	2	2
CNAG_03079	170	275	0.618182
CNAG_03081	1048	736	1.42391
CNAG_03084	115	109	1.05505
CNAG_03087	5	1	5
CNAG_03090	47	295	0.159322
CNAG_03091	3	1	3
CNAG_03092	268	398	0.673367
CNAG_03095	122	133	0.917293
CNAG_03096	353	458	0.770742
CNAG_03099	424	522	0.812261
CNAG_03101	15	168	0.0892857
CNAG_03102	277	222	1.24775
CNAG_03104	309	390	0.792308
CNAG_03105	1	88	0.0113636
CNAG_03106	838	684	1.22515
CNAG_03107	1	1	1
CNAG_03108	300	458	0.655022
CNAG_03113	427	293	1.45734
CNAG_03117	833	516	1.61434
CNAG_03119	210	322	0.652174
CNAG_03120	4396	2691	1.63359
CNAG_03122	26	245	0.106122
CNAG_03124	1360	1299	1.04696
CNAG_03126	155	315	0.492063
CNAG_03129	434	587	0.739353
CNAG_03133	67	139	0.482014
CNAG_03134	111	167	0.664671
CNAG_03136	498	921	0.540717
CNAG_03137	37	226	0.163717
CNAG_03138	558	477	1.16981
CNAG_03140	147	1699	0.0865215
CNAG_03141	37	96	0.385417
CNAG_03142	373	574	0.649826
CNAG_03144	514	582	0.883162
CNAG_03145	9	80	0.1125
CNAG_03147	545	679	0.802651
CNAG_03149	436	374	1.16578
CNAG_03150	423	535	0.790654
CNAG_03152	607	415	1.46265
CNAG_03154	160	321	0.498442
CNAG_03156	338	349	0.968481
CNAG_03157	804	554	1.45126
CNAG_03159	458	538	0.851301
CNAG_03162	373	346	1.07803
CNAG_03165	358	536	0.66791
CNAG_03166	143	177	0.80791
CNAG_03168	2452	1248	1.96474
CNAG_03169	13	7	1.85714
CNAG_03171	873	668	1.30689
CNAG_03172	236	231	1.02165
CNAG_03174	142	205	0.692683
CNAG_03176	569	699	0.81402
CNAG_03177	196	311	0.630225
CNAG_03181	19	29	0.655172
CNAG_03183	812	748	1.08556
CNAG_03188	1024	1031	0.99321
CNAG_03189	387	633	0.611374
CNAG_03191	475	656	0.724085
CNAG_03193	3	15	0.2
CNAG_03195	30	159	0.188679
CNAG_03199	11	9	1.22222
CNAG_03202	1036	884	1.17195
CNAG_03205	987	776	1.27191
CNAG_03211	17	75	0.226667
CNAG_03212	490	295	1.66102
CNAG_03213	155	371	0.41779
CNAG_03214	87	257	0.338521
CNAG_03216	358	214	1.6729
CNAG_03217	562	395	1.42278
CNAG_03221	238	556	0.428058
CNAG_03223	649	783	0.828863
CNAG_03224	3	7	0.428571
CNAG_03225	1008	1069	0.942937
CNAG_03226	782	853	0.916764
CNAG_03227	88	284	0.309859
CNAG_03229	17	19	0.894737
CNAG_03230	58	115	0.504348
CNAG_03233	12	124	0.0967742
CNAG_03235	902	808	1.11634
CNAG_03236	236	222	1.06306
CNAG_03238	15	87	0.172414
CNAG_03240	752	836	0.899522
CNAG_03241	411	338	1.21598
CNAG_03245	1332	1204	1.10631
CNAG_03246	671	803	0.835616
CNAG_03250	262	508	0.515748
CNAG_03258	404	766	0.527415
CNAG_03260	534	513	1.04094
CNAG_03262	378	728	0.519231
CNAG_03264	533	692	0.770231
CNAG_03266	758	630	1.20317
CNAG_03267	1177	1148	1.02526
CNAG_03268	216	574	0.376307
CNAG_03269	287	764	0.375654
CNAG_03271	953	1166	0.817324
CNAG_03273	1185	947	1.25132
CNAG_03275	442	422	1.04739
CNAG_03279	135	212	0.636792
CNAG_03281	633	1064	0.594925
CNAG_03284	657	813	0.808118
CNAG_03286	397	327	1.21407
CNAG_03288	386	652	0.592025
CNAG_03290	430	455	0.945055
CNAG_03291	434	497	0.873239
CNAG_03292	5	13	0.384615
CNAG_03297	808	640	1.2625
CNAG_03298	287	419	0.684964
CNAG_03301	299	416	0.71875
CNAG_03304	360	256	1.40625
CNAG_03305	409	285	1.43509
CNAG_03308	983	605	1.62479
CNAG_03309	420	476	0.882353
CNAG_03311	1305	1188	1.09848
CNAG_03312	205	243	0.843621
CNAG_03314	825	497	1.65996
CNAG_03315	569	760	0.748684
CNAG_03318	27	54	0.5
CNAG_03319	1657	924	1.79329
CNAG_03321	671	843	0.795967
CNAG_03322	1146	1055	1.08626
CNAG_03324	609	536	1.13619
CNAG_03326	257	383	0.671018
CNAG_03328	658	410	1.60488
CNAG_03330	112	156	0.717949
CNAG_03332	546	637	0.857143
CNAG_03333	1276	822	1.55231
CNAG_03337	255	471	0.541401
CNAG_03339	17	206	0.0825243
CNAG_03341	1313	1054	1.24573
CNAG_03343	434	621	0.698873
CNAG_03345	2149	1625	1.32246
CNAG_03346	29	45	0.644444
CNAG_03347	1366	1292	1.05728
CNAG_03348	706	619	1.14055
CNAG_03349	1256	1095	1.14703
CNAG_03352	189	410	0.460976
CNAG_03356	367	527	0.696395
CNAG_03357	639	588	1.08673
CNAG_03358	1233	1405	0.87758
CNAG_03362	662	578	1.14533
CNAG_03364	374	457	0.818381
CNAG_03367	541	687	0.787482
CNAG_03370	491	736	0.66712
CNAG_03372	949	614	1.5456
CNAG_03374	166	263	0.631179
CNAG_03376	396	165	2.4
CNAG_03377	251	502	0.5
CNAG_03379	333	408	0.816176
CNAG_03381	54	130	0.415385
CNAG_03382	298	437	0.681922
CNAG_03384	5	24	0.208333
CNAG_03387	55	690	0.0797101
CNAG_03388	638	683	0.934114
CNAG_03391	517	411	1.25791
CNAG_03393	247	153	1.61438
CNAG_03394	213	201	1.0597
CNAG_03399	1567	1286	1.21851
CNAG_03400	75	281	0.266904
CNAG_03402	489	567	0.862434
CNAG_03403	452	424	1.06604
CNAG_03405	523	782	0.668798
CNAG_03409	1064	733	1.45157
CNAG_03411	212	299	0.70903
CNAG_03412	272	292	0.931507
CNAG_03416	353	402	0.878109
CNAG_03418	2255	1224	1.84232
CNAG_03421	12	139	0.0863309
CNAG_03423	757	406	1.86453
CNAG_03426	617	502	1.22908
CNAG_03427	28	279	0.100358
CNAG_03433	314	594	0.52862
CNAG_03434	595	810	0.734568
CNAG_03436	702	621	1.13043
CNAG_03437	104	251	0.414343
CNAG_03438	1515	1782	0.850168
CNAG_03439	568	898	0.632517
CNAG_03441	452	475	0.951579
CNAG_03444	202	499	0.40481
CNAG_03448	837	475	1.76211
CNAG_03451	580	691	0.839363
CNAG_03452	489	677	0.722304
CNAG_03454	53	34	1.55882
CNAG_03456	515	598	0.861204
CNAG_03457	1695	1322	1.28215
CNAG_03458	403	548	0.735401
CNAG_03460	8	1	8
CNAG_03461	80	145	0.551724
CNAG_03466	892	645	1.38295
CNAG_03468	3	27	0.111111
CNAG_03474	7	113	0.0619469
CNAG_03475	689	708	0.973164
CNAG_03476	2089	1696	1.23172
CNAG_03477	165	529	0.311909
CNAG_03479	1324	696	1.9023
CNAG_03480	132	158	0.835443
CNAG_03483	447	685	0.652555
CNAG_03485	1153	762	1.51312
CNAG_03486	638	774	0.824289
CNAG_03488	153	285	0.536842
CNAG_03494	966	930	1.03871
CNAG_03497	382	609	0.627258
CNAG_03498	3	43	0.0697674
CNAG_03499	227	435	0.521839
CNAG_03500	898	285	3.15088
CNAG_03503	732	326	2.2454
CNAG_03507	1127	1101	1.02361
CNAG_03509	837	903	0.92691
CNAG_03511	78	59	1.32203
CNAG_03513	692	715	0.967832
CNAG_03516	538	443	1.21445
CNAG_03517	934	878	1.06378
CNAG_03518	8	86	0.0930233
CNAG_03520	293	235	1.24681
CNAG_03522	141	248	0.568548
CNAG_03524	762	622	1.22508
CNAG_03525	101	281	0.359431
CNAG_03527	1044	710	1.47042
CNAG_03538	23	526	0.0437262
CNAG_03540	410	693	0.591631
CNAG_03541	562	677	0.830133
CNAG_03542	791	763	1.0367
CNAG_03548	20	46	0.434783
CNAG_03551	5	7	0.714286
CNAG_03552	76	513	0.148148
CNAG_03555	133	212	0.627358
CNAG_03557	229	451	0.507761
CNAG_03559	59	255	0.231373
CNAG_03561	312	463	0.673866
CNAG_03563	570	528	1.07955
CNAG_03577	986	1139	0.865672
CNAG_03583	429	355	1.20845
CNAG_03587	406	510	0.796078
CNAG_03588	3104	1730	1.79422
CNAG_03589	439	640	0.685937
CNAG_03590	570	885	0.644068
CNAG_03592	826	922	0.895879
CNAG_03595	685	995	0.688442
CNAG_03596	1173	1272	0.92217
CNAG_03597	21	101	0.207921
CNAG_03599	461	208	2.21635
CNAG_03602	1584	2245	0.705568
CNAG_03604	594	504	1.17857
CNAG_03605	392	412	0.951456
CNAG_03607	315	133	2.36842
CNAG_03609	247	324	0.762346
CNAG_03619	213	225	0.946667
CNAG_03621	549	766	0.71671
CNAG_03624	1414	1152	1.22743
CNAG_03629	1884	1909	0.986904
CNAG_03630	14	9	1.55556
CNAG_03631	318	457	0.695842
CNAG_03633	286	225	1.27111
CNAG_03635	9	24	0.375
CNAG_03637	421	565	0.745133
CNAG_03639	168	252	0.666667
CNAG_03641	1397	1203	1.16126
CNAG_03646	525	621	0.845411
CNAG_03651	436	618	0.705502
CNAG_03653	666	931	0.71536
CNAG_03654	266	504	0.527778
CNAG_03656	43	128	0.335938
CNAG_03658	440	306	1.43791
CNAG_03659	602	427	1.40984
CNAG_03661	272	387	0.702842
CNAG_03664	525	777	0.675676
CNAG_03666	170	153	1.11111
CNAG_03667	308	492	0.626016
CNAG_03669	685	583	1.17496
CNAG_03671	338	333	1.01502
CNAG_03672	319	404	0.789604
CNAG_03674	2441	1696	1.43927
CNAG_03676	329	476	0.691176
CNAG_03678	216	316	0.683544
CNAG_03682	430	602	0.714286
CNAG_03683	279	268	1.04104
CNAG_03684	640	1057	0.605487
CNAG_03685	223	448	0.497768
CNAG_03687	125	247	0.506073
CNAG_03688	319	447	0.713647
CNAG_03689	448	632	0.708861
CNAG_03692	137	76	1.80263
CNAG_03694	478	475	1.00632
CNAG_03697	82	89	0.921348
CNAG_03698	305	599	0.509182
CNAG_03700	631	627	1.00638
CNAG_03701	3084	1122	2.74866
CNAG_03707	253	464	0.545259
CNAG_03710	678	733	0.924966
CNAG_03711	153	364	0.42033
CNAG_03713	5	57	0.0877193
CNAG_03714	430	858	0.501166
CNAG_03720	325	527	0.616698
CNAG_03721	625	730	0.856164
CNAG_03723	667	500	1.334
CNAG_03725	798	912	0.875
CNAG_03728	173	171	1.0117
CNAG_03730	386	587	0.657581
CNAG_03732	156	502	0.310757
CNAG_03734	142	137	1.0365
CNAG_03738	442	689	0.641509
CNAG_03740	9	28	0.321429
CNAG_03742	1899	1142	1.66287
CNAG_03744	3	5	0.6
CNAG_03747	477	761	0.626807
CNAG_03753	471	408	1.15441
CNAG_03754	29	16	1.8125
CNAG_03755	240	321	0.747664
CNAG_03759	7	53	0.132075
CNAG_03761	1821	747	2.43775
CNAG_03762	1859	1345	1.38216
CNAG_03766	453	519	0.872832
CNAG_03767	1244	1121	1.10972
CNAG_03770	145	143	1.01399
CNAG_03772	25	93	0.268817
CNAG_03775	873	1190	0.733613
CNAG_03777	351	464	0.756466
CNAG_03779	794	704	1.12784
CNAG_03782	9	1	9
CNAG_03784	7	11	0.636364
CNAG_03785	1194	749	1.59413
CNAG_03789	584	767	0.761408
CNAG_03791	814	434	1.87558
CNAG_03794	195	373	0.522788
CNAG_03795	235	369	0.636856
CNAG_03805	729	925	0.788108
CNAG_03806	80	309	0.2589
CNAG_03807	9	87	0.103448
CNAG_03808	523	476	1.09874
CNAG_03809	759	1045	0.726316
CNAG_03811	253	656	0.385671
CNAG_03812	1044	960	1.0875
CNAG_03814	311	573	0.542757
CNAG_03815	540	576	0.9375
CNAG_03818	1208	548	2.20438
CNAG_03820	1690	1423	1.18763
CNAG_03823	225	357	0.630252
CNAG_03824	631	847	0.744982
CNAG_03825	1	51	0.0196078
CNAG_03826	751	807	0.930607
CNAG_03832	586	744	0.787634
CNAG_03833	1	5	0.2
CNAG_03834	407	267	1.52434
CNAG_03837	105	228	0.460526
CNAG_03839	1552	984	1.57724
CNAG_03843	760	392	1.93878
CNAG_03845	280	431	0.649652
CNAG_03847	352	613	0.574225
CNAG_03850	542	866	0.625866
CNAG_03853	478	629	0.759936
CNAG_03855	130	200	0.65
CNAG_03858	590	858	0.687646
CNAG_03859	701	562	1.24733
CNAG_03861	448	518	0.864865
CNAG_03863	958	1101	0.870118
CNAG_03864	807	516	1.56395
CNAG_03866	366	368	0.994565
CNAG_03868	444	512	0.867188
CNAG_03869	99	446	0.221973
CNAG_03872	550	339	1.62242
CNAG_03873	172	283	0.607774
CNAG_03875	504	850	0.592941
CNAG_03876	382	577	0.662045
CNAG_03877	484	859	0.563446
CNAG_03881	110	417	0.263789
CNAG_03882	404	575	0.702609
CNAG_03885	389	750	0.518667
CNAG_03887	378	560	0.675
CNAG_03890	624	551	1.13249
CNAG_03891	1702	1766	0.96376
CNAG_03898	576	575	1.00174
CNAG_03900	492	605	0.813223
CNAG_03902	912	789	1.15589
CNAG_03903	615	865	0.710983
CNAG_03904	960	1358	0.706922
CNAG_03906	88	119	0.739496
CNAG_03907	385	305	1.2623
CNAG_03908	404	655	0.616794
CNAG_03910	200	200	1
CNAG_03911	17	42	0.404762
CNAG_03913	372	281	1.32384
CNAG_03914	332	511	0.649706
CNAG_03916	1483	1380	1.07464
CNAG_03918	411	497	0.826962
CNAG_03919	319	310	1.02903
CNAG_03925	255	372	0.685484
CNAG_03927	245	296	0.827703
CNAG_03930	376	448	0.839286
CNAG_03932	163	288	0.565972
CNAG_03934	20	3	6.66667
CNAG_03935	1058	720	1.46944
CNAG_03936	509	574	0.88676
CNAG_03938	10	56	0.178571
CNAG_03939	957	1062	0.90113
CNAG_03944	1170	1314	0.890411
CNAG_03946	443	315	1.40635
CNAG_03949	491	484	1.01446
CNAG_03951	214	474	0.451477
CNAG_03952	309	636	0.485849
CNAG_03955	171	508	0.336614
CNAG_03957	688	779	0.883184
CNAG_03958	264	313	0.84345
CNAG_03960	476	422	1.12796
CNAG_03962	1293	979	1.32074
CNAG_03964	599	695	0.86187
CNAG_03966	444	504	0.880952
CNAG_03967	838	1017	0.823992
CNAG_03968	501	607	0.825371
CNAG_03971	3	5	0.6
CNAG_03975	1773	1103	1.60743
CNAG_03977	604	652	0.92638
CNAG_03980	3	25	0.12
CNAG_03981	253	469	0.539446
CNAG_03982	330	503	0.656064
CNAG_03983	808	847	0.953955
CNAG_03984	241	389	0.619537
CNAG_03986	726	809	0.897404
CNAG_03987	1220	1295	0.942085
CNAG_03988	142	249	0.570281
CNAG_03991	222	385	0.576623
CNAG_03994	315	289	1.08997
CNAG_03996	886	1072	0.826493
CNAG_03998	435	503	0.864811
CNAG_03999	72	73	0.986301
CNAG_04000	452	537	0.841713
CNAG_04001	595	720	0.826389
CNAG_04009	1946	1237	1.57316
CNAG_04010	889	929	0.956943
CNAG_04012	94	233	0.403433
CNAG_04014	916	905	1.01215
CNAG_04015	5	64	0.078125
CNAG_04018	645	339	1.90265
CNAG_04023	757	740	1.02297
CNAG_04024	20	233	0.0858369
CNAG_04026	253	394	0.642132
CNAG_04027	17	51	0.333333
CNAG_04029	11	59	0.186441
CNAG_04030	195	490	0.397959
CNAG_04032	1459	1424	1.02458
CNAG_04037	265	403	0.657568
CNAG_04038	71	158	0.449367
CNAG_04041	553	237	2.33333
CNAG_04044	642	583	1.1012
CNAG_04046	284	439	0.646925
CNAG_04048	947	893	1.06047
CNAG_04050	390	720	0.541667
CNAG_04052	825	565	1.46018
CNAG_04053	321	472	0.680085
CNAG_04055	219	301	0.727575
CNAG_04063	312	445	0.701124
CNAG_04064	435	565	0.769911
CNAG_04066	415	508	0.816929
CNAG_04068	542	915	0.59235
CNAG_04070	361	537	0.672253
CNAG_04071	657	650	1.01077
CNAG_04073	995	992	1.00302
CNAG_04077	19	25	0.76
CNAG_04079	773	521	1.48369
CNAG_04081	307	367	0.836512
CNAG_04083	282	364	0.774725
CNAG_04085	26	278	0.0935252
CNAG_04087	126	117	1.07692
CNAG_04089	456	685	0.665693
CNAG_04092	5	11	0.454545
CNAG_04093	11	15	0.733333
CNAG_04094	208	212	0.981132
CNAG_04096	9	31	0.290323
CNAG_04100	58	149	0.389262
CNAG_04101	78	561	0.139037
CNAG_04103	16	29	0.551724
CNAG_04105	74	286	0.258741
CNAG_04106	89	63	1.4127
CNAG_04108	384	502	0.76494
CNAG_04109	3	3	1
CNAG_04113	868	1075	0.807442
CNAG_04117	193	189	1.02116
CNAG_04118	781	882	0.885488
CNAG_04120	794	586	1.35495
CNAG_04121	300	508	0.590551
CNAG_04122	197	209	0.942584
CNAG_04128	333	396	0.840909
CNAG_04130	929	1062	0.874765
CNAG_04131	1113	1429	0.778866
CNAG_04137	673	418	1.61005
CNAG_04139	3	35	0.0857143
CNAG_04142	73	75	0.973333
CNAG_04143	5	22	0.227273
CNAG_04147	763	387	1.97158
CNAG_04149	854	899	0.949944
CNAG_04151	1423	1099	1.29481
CNAG_04153	91	186	0.489247
CNAG_04155	263	471	0.558386
CNAG_04157	390	461	0.845987
CNAG_04160	5	16	0.3125
CNAG_04161	526	465	1.13118
CNAG_04162	530	492	1.07724
CNAG_04165	162	282	0.574468
CNAG_04167	221	640	0.345313
CNAG_04169	183	213	0.859155
CNAG_04172	386	425	0.908235
CNAG_04174	393	336	1.16964
CNAG_04176	675	767	0.880052
CNAG_04177	307	474	0.647679
CNAG_04179	1681	1378	1.21988
CNAG_04181	532	602	0.883721
CNAG_04182	513	591	0.86802
CNAG_04184	248	291	0.852234
CNAG_04185	70	60	1.16667
CNAG_04186	125	153	0.816993
CNAG_04189	1540	1535	1.00326
CNAG_04191	949	569	1.66784
CNAG_04193	318	517	0.615087
CNAG_04198	752	376	2
CNAG_04200	260	297	0.875421
CNAG_04202	513	419	1.22434
CNAG_04204	242	427	0.566745
CNAG_04206	181	240	0.754167
CNAG_04208	517	452	1.14381
CNAG_04211	1011	997	1.01404
CNAG_04213	1252	517	2.42166
CNAG_04218	149	228	0.653509
CNAG_04220	334	361	0.925208
CNAG_04223	1	8	0.125
CNAG_04225	26	214	0.121495
CNAG_04227	2024	795	2.54591
CNAG_04230	833	837	0.995221
CNAG_04232	211	202	1.04455
CNAG_04234	324	456	0.710526
CNAG_04236	586	666	0.87988
CNAG_04237	248	339	0.731563
CNAG_04239	401	237	1.69198
CNAG_04241	286	323	0.885449
CNAG_04244	667	346	1.92775
CNAG_04246	21	120	0.175
CNAG_04248	368	218	1.68807
CNAG_04252	202	227	0.889868
CNAG_04254	68	87	0.781609
CNAG_04256	94	207	0.454106
CNAG_04258	295	418	0.705742
CNAG_04260	904	882	1.02494
CNAG_04262	85	116	0.732759
CNAG_04263	381	461	0.826464
CNAG_04265	923	966	0.955487
CNAG_04267	499	238	2.09664
CNAG_04268	302	186	1.62366
CNAG_04270	311	364	0.854396
CNAG_04272	612	764	0.801047
CNAG_04273	542	696	0.778736
CNAG_04274	17	29	0.586207
CNAG_04276	694	758	0.915567
CNAG_04278	815	659	1.23672
CNAG_04280	10	53	0.188679
CNAG_04283	623	694	0.897695
CNAG_04284	1023	1207	0.847556
CNAG_04286	373	570	0.654386
CNAG_04289	942	1375	0.685091
CNAG_04294	99	239	0.414226
CNAG_04295	265	553	0.479204
CNAG_04296	346	251	1.37849
CNAG_04298	1342	1159	1.15789
CNAG_04300	317	525	0.60381
CNAG_04302	450	484	0.929752
CNAG_04304	1398	1552	0.900773
CNAG_04306	298	569	0.523726
CNAG_04307	310	299	1.03679
CNAG_04309	170	270	0.62963
CNAG_04310	446	259	1.72201
CNAG_04314	213	618	0.34466
CNAG_04318	582	496	1.17339
CNAG_04320	726	843	0.86121
CNAG_04323	118	207	0.570048
CNAG_04326	202	462	0.437229
CNAG_04327	3128	1513	2.06742
CNAG_04328	330	489	0.674847
CNAG_04330	7	8	0.875
CNAG_04332	254	384	0.661458
CNAG_04334	744	827	0.899637
CNAG_04335	1298	963	1.34787
CNAG_04337	6	64	0.09375
CNAG_04338	380	532	0.714286
CNAG_04342	9	20	0.45
CNAG_04343	15	146	0.10274
CNAG_04345	60	185	0.324324
CNAG_04348	966	987	0.978723
CNAG_04352	442	236	1.87288
CNAG_04353	390	315	1.2381
CNAG_04355	360	375	0.96
CNAG_04358	591	710	0.832394
CNAG_04360	876	821	1.06699
CNAG_04361	1258	895	1.40559
CNAG_04365	1917	1855	1.03342
CNAG_04367	340	285	1.19298
CNAG_04369	171	107	1.59813
CNAG_04371	118	383	0.308094
CNAG_04373	800	1114	0.718133
CNAG_04374	17	277	0.0613718
CNAG_04375	898	986	0.910751
CNAG_04377	382	639	0.597809
CNAG_04381	380	314	1.21019
CNAG_04383	479	529	0.905482
CNAG_04385	5	7	0.714286
CNAG_04387	260	342	0.760234
CNAG_04389	246	541	0.454713
CNAG_04393	1473	930	1.58387
CNAG_04395	709	914	0.775711
CNAG_04397	448	410	1.09268
CNAG_04399	468	533	0.878049
CNAG_04401	657	753	0.87251
CNAG_04403	414	513	0.807018
CNAG_04405	392	595	0.658824
CNAG_04407	609	651	0.935484
CNAG_04408	855	651	1.31336
CNAG_04411	277	274	1.01095
CNAG_04412	459	520	0.882692
CNAG_04414	591	515	1.14757
CNAG_04415	45	88	0.511364
CNAG_04433	1012	662	1.5287
CNAG_04437	328	328	1
CNAG_04439	1054	865	1.2185
CNAG_04441	1937	1830	1.05847
CNAG_04442	3	5	0.6
CNAG_04443	397	383	1.03655
CNAG_04444	2246	1445	1.55433
CNAG_04447	356	355	1.00282
CNAG_04448	644	878	0.733485
CNAG_04449	196	458	0.427948
CNAG_04450	2081	1049	1.98379
CNAG_04451	456	496	0.919355
CNAG_04453	451	229	1.96943
CNAG_04454	5	11	0.454545
[truncated: 6,233 more rows]

## Sheet: 37_vs_30 RNA-seq
gene_id	baseMean	log2FoldChange	lfcSE	stat	pvalue	padj
CNAG_05602	8613.86	-2.6775	0.170992	-15.6587	2.9e-55	2.19e-51
CNAG_02338	11439.3	-2.30492	0.177196	-13.0078	1.11e-38	3.95e-35
CNAG_01648	17712.2	-2.60798	0.200909	-12.9809	1.57e-38	3.95e-35
CNAG_06347	2800.26	2.54067	0.198965	12.7694	2.43e-37	4.58e-34
CNAG_01455	34831.7	-1.95233	0.158891	-12.2873	1.06e-34	1.6e-31
CNAG_04021	47675.9	-2.24544	0.184057	-12.1997	3.12e-34	3.92e-31
CNAG_06811	46901.8	-2.1987	0.180863	-12.1567	5.29e-34	5.7e-31
CNAG_01264	6574.43	-1.8568	0.154318	-12.0323	2.4e-33	2.27e-30
CNAG_03168	4754.55	-2.20887	0.186135	-11.867	1.76e-32	1.47e-29
CNAG_02144	55879.8	-1.85233	0.157154	-11.7867	4.57e-32	3.45e-29
CNAG_01683	3595.23	-3.04673	0.258785	-11.7732	5.37e-32	3.68e-29
CNAG_07807	16312.1	-2.62374	0.225639	-11.628	2.97e-31	1.87e-28
CNAG_01332	57491.6	-2.21374	0.190787	-11.6032	3.97e-31	2.31e-28
CNAG_06231	63720.9	-2.09216	0.180551	-11.5876	4.76e-31	2.57e-28
CNAG_06930	2074.66	-2.06623	0.179378	-11.5188	1.06e-30	5.33e-28
CNAG_02048	2263.2	-2.09289	0.182296	-11.4807	1.65e-30	7.78e-28
CNAG_03053	64445	-1.93942	0.169641	-11.4325	2.88e-30	1.28e-27
CNAG_01486	69497.1	-2.20837	0.19462	-11.347	7.67e-30	3.22e-27
CNAG_01628	58712.9	-2.32706	0.205178	-11.3417	8.16e-30	3.24e-27
CNAG_01300	45943.2	-2.28116	0.202158	-11.284	1.57e-29	5.94e-27
CNAG_03221	27491.1	-2.28335	0.202813	-11.2584	2.11e-29	7.57e-27
CNAG_04726	64451.3	-2.11997	0.189043	-11.2142	3.47e-29	1.19e-26
CNAG_00149	7165.08	-1.72588	0.153953	-11.2105	3.62e-29	1.19e-26
CNAG_04799	60107.2	-1.90847	0.170334	-11.2043	3.88e-29	1.22e-26
CNAG_00613	1301.25	-2.16828	0.194303	-11.1593	6.45e-29	1.95e-26
CNAG_00771	49782.2	-2.22609	0.200532	-11.1009	1.24e-28	3.6e-26
CNAG_04762	59167.1	-1.66545	0.1502	-11.0883	1.43e-28	3.88e-26
CNAG_06847	25284.9	-1.91027	0.172288	-11.0877	1.44e-28	3.88e-26
CNAG_06623	942.743	2.61813	0.237001	11.0469	2.27e-28	5.9e-26
CNAG_01224	83148.5	-2.07857	0.188966	-10.9997	3.83e-28	9.64e-26
CNAG_03949	866.639	-1.9231	0.175249	-10.9735	5.12e-28	1.25e-25
CNAG_01951	49727.8	-1.92203	0.175241	-10.9679	5.45e-28	1.29e-25
CNAG_01480	55120.8	-1.94522	0.177692	-10.9472	6.86e-28	1.57e-25
CNAG_02811	30640.8	-2.22951	0.203993	-10.9294	8.34e-28	1.85e-25
CNAG_06222	63006.2	-2.09584	0.192686	-10.877	1.48e-27	3.2e-25
CNAG_00699	456.804	2.72399	0.250533	10.8728	1.55e-27	3.26e-25
CNAG_06949	4058.8	-2.20159	0.202977	-10.8465	2.07e-27	4.23e-25
CNAG_06144	27537.1	-1.92983	0.178237	-10.8273	2.56e-27	5.08e-25
CNAG_04883	49551.7	-2.26134	0.20932	-10.8033	3.32e-27	6.43e-25
CNAG_01153	60009.8	-1.78004	0.165521	-10.7542	5.67e-27	1.07e-24
CNAG_06447	67273.8	-2.03749	0.190216	-10.7115	8.99e-27	1.66e-24
CNAG_07486	338.395	2.07106	0.193938	10.679	1.28e-26	2.29e-24
CNAG_06095	71695.7	-2.07429	0.195144	-10.6296	2.17e-26	3.81e-24
CNAG_03127	46523.3	-1.95318	0.184207	-10.6032	2.88e-26	4.94e-24
CNAG_03510	5658.87	-1.87078	0.176612	-10.5926	3.22e-26	5.41e-24
CNAG_05556	38033.5	-2.16362	0.204357	-10.5875	3.41e-26	5.59e-24
CNAG_04901	849.557	-2.39266	0.226675	-10.5555	4.79e-26	7.69e-24
CNAG_07839	54333.5	-1.88597	0.179001	-10.5361	5.89e-26	9.26e-24
CNAG_05465	52747.6	-1.7754	0.169671	-10.4638	1.27e-25	1.95e-23
CNAG_05904	45027.4	-2.08181	0.199843	-10.4172	2.07e-25	3.12e-23
CNAG_03303	47470	-2.02597	0.195038	-10.3876	2.82e-25	4.18e-23
CNAG_05525	63126.7	-2.15991	0.208496	-10.3595	3.79e-25	5.5e-23
CNAG_05592	5186.62	1.488	0.143773	10.3496	4.2e-25	5.98e-23
CNAG_06633	64519.5	-1.97579	0.191631	-10.3104	6.32e-25	8.84e-23
CNAG_00232	72410.8	-2.21357	0.214818	-10.3044	6.73e-25	9.24e-23
CNAG_04445	48189.1	-1.76379	0.171206	-10.3022	6.89e-25	9.28e-23
CNAG_01428	35993.3	-1.59199	0.155187	-10.2585	1.08e-24	1.43e-22
CNAG_01976	39536.4	-1.80746	0.177009	-10.2111	1.77e-24	2.3e-22
CNAG_06747	23543.7	-2.37777	0.233371	-10.1888	2.23e-24	2.85e-22
CNAG_03780	52385.2	-1.92712	0.189184	-10.1865	2.28e-24	2.87e-22
CNAG_00370	42772.1	-1.94062	0.190823	-10.1697	2.71e-24	3.35e-22
CNAG_00821	37494.4	-2.08216	0.205876	-10.1136	4.81e-24	5.85e-22
CNAG_00672	53528.7	-1.90965	0.18905	-10.1013	5.45e-24	6.53e-22
CNAG_00656	70645.7	-1.69995	0.168549	-10.0858	6.38e-24	7.53e-22
CNAG_01152	71425.7	-1.91982	0.190421	-10.082	6.64e-24	7.71e-22
CNAG_05159	383.897	2.28926	0.227206	10.0757	7.07e-24	8.09e-22
CNAG_03000	52201.4	-2.08397	0.206866	-10.074	7.2e-24	8.11e-22
CNAG_02234	60491.4	-1.68446	0.167257	-10.0711	7.41e-24	8.23e-22
CNAG_05555	64177.6	-1.71157	0.172106	-9.94488	2.65e-23	2.9e-21
CNAG_01170	55562.2	-1.89887	0.191218	-9.93039	3.07e-23	3.31e-21
CNAG_03747	54210.6	-2.07704	0.20988	-9.89631	4.32e-23	4.59e-21
CNAG_00116	54047.4	-1.83531	0.185945	-9.87018	5.61e-23	5.88e-21
CNAG_00703	48699.4	-2.18713	0.221807	-9.86053	6.17e-23	6.38e-21
CNAG_02330	39671.1	-1.92237	0.195727	-9.82169	9.08e-23	9.26e-21
CNAG_01390	6052.86	-1.58008	0.160952	-9.81707	9.51e-23	9.56e-21
CNAG_04068	30624.7	-1.76081	0.180739	-9.74227	1.99e-22	1.98e-20
CNAG_04217	148.548	-2.35308	0.241731	-9.7343	2.15e-22	2.11e-20
CNAG_05800	34610.9	-1.66027	0.171337	-9.6901	3.32e-22	3.21e-20
CNAG_00819	29544.9	-2.14016	0.221096	-9.67979	3.67e-22	3.51e-20
CNAG_03283	56115.8	-2.15785	0.222953	-9.67847	3.72e-22	3.51e-20
CNAG_05725	36165	-1.52199	0.157526	-9.66186	4.38e-22	4.08e-20
CNAG_04236	3116.77	-1.52409	0.157808	-9.6579	4.55e-22	4.19e-20
CNAG_03176	2202.13	1.86395	0.193789	9.61846	6.68e-22	6.08e-20
CNAG_03198	95215.9	-1.88584	0.196463	-9.59895	8.08e-22	7.26e-20
CNAG_05814	46889.6	-1.95965	0.205452	-9.5382	1.45e-21	1.29e-19
CNAG_04448	75797	-2.03741	0.213935	-9.52349	1.67e-21	1.47e-19
CNAG_01148	9855.68	-1.71006	0.179744	-9.51387	1.84e-21	1.59e-19
CNAG_06746	29681	-2.27962	0.23975	-9.5083	1.94e-21	1.66e-19
CNAG_06840	52049.8	-1.41645	0.149248	-9.49057	2.3e-21	1.95e-19
CNAG_04690	380.404	-1.8936	0.199741	-9.48029	2.54e-21	2.13e-19
CNAG_01273	7557.14	-1.96817	0.208152	-9.45544	3.22e-21	2.67e-19
CNAG_01621	2984.37	2.92324	0.309608	9.44174	3.67e-21	3.01e-19
CNAG_05458	381.244	1.97633	0.210524	9.38766	6.13e-21	4.98e-19
CNAG_03281	6414.3	-1.72535	0.184423	-9.35541	8.33e-21	6.69e-19
CNAG_02928	60199.5	-1.72604	0.185011	-9.32942	1.06e-20	8.46e-19
CNAG_00034	50874.6	-1.93378	0.20913	-9.24679	2.31e-20	1.82e-18
CNAG_02714	46934	-1.61314	0.175003	-9.21778	3.03e-20	2.36e-18
CNAG_00640	81030.5	-1.90495	0.206762	-9.21324	3.16e-20	2.44e-18
CNAG_02917	1380.06	-1.84985	0.201002	-9.20314	3.48e-20	2.65e-18
CNAG_04675	883.898	2.14908	0.235359	9.13105	6.78e-20	5.12e-18
CNAG_03677	1706.11	2.06136	0.226318	9.10825	8.37e-20	6.26e-18
CNAG_05499	1445.09	-1.67283	0.183699	-9.10638	8.52e-20	6.3e-18
CNAG_03739	56125.8	-1.70341	0.187689	-9.07574	1.13e-19	8.27e-18
CNAG_06745	24888.1	-2.52407	0.278361	-9.06762	1.22e-19	8.83e-18
CNAG_00779	34198.5	-1.9307	0.214677	-8.9935	2.39e-19	1.72e-17
CNAG_03819	4550.17	-1.53094	0.170773	-8.96479	3.11e-19	2.21e-17
CNAG_05437	7256.03	-1.71158	0.191068	-8.95795	3.31e-19	2.33e-17
CNAG_02226	400.841	2.77763	0.310606	8.94263	3.8e-19	2.64e-17
CNAG_03375	7719.47	-1.53428	0.171577	-8.94224	3.81e-19	2.64e-17
CNAG_03461	346.113	1.81702	0.203231	8.94064	3.87e-19	2.65e-17
CNAG_01752	5070.54	-1.49221	0.1689	-8.83486	1e-18	6.81e-17
CNAG_02285	33527.1	-1.81622	0.206945	-8.77635	1.69e-18	1.14e-16
CNAG_02754	46620.2	-1.91078	0.218394	-8.74925	2.15e-18	1.43e-16
CNAG_04011	32044.1	-2.22292	0.255481	-8.70092	3.29e-18	2.18e-16
CNAG_02735	268.314	2.59308	0.299067	8.67057	4.3e-18	2.82e-16
CNAG_04215	5506.3	-1.80058	0.207854	-8.66274	4.61e-18	3e-16
CNAG_06141	958.704	-1.47614	0.170606	-8.65233	5.05e-18	3.25e-16
CNAG_05070	6036.43	-1.39149	0.161586	-8.61145	7.21e-18	4.61e-16
CNAG_07363	6141.19	-1.76125	0.204828	-8.5987	8.06e-18	5.11e-16
CNAG_13013	225.165	-1.99289	0.233444	-8.53693	1.38e-17	8.67e-16
CNAG_04589	295.856	1.78509	0.20937	8.52603	1.51e-17	9.45e-16
CNAG_03848	349.054	1.78018	0.208999	8.51762	1.63e-17	1.01e-15
CNAG_02084	5446.38	-1.45574	0.170965	-8.51488	1.67e-17	1.02e-15
CNAG_03577	39883.5	-1.53572	0.180377	-8.51392	1.68e-17	1.02e-15
CNAG_02378	8163	-1.49155	0.176219	-8.46415	2.58e-17	1.56e-15
CNAG_01800	4006.92	-2.02268	0.239764	-8.43615	3.28e-17	1.96e-15
CNAG_05221	1353.63	-1.35037	0.160109	-8.43409	3.34e-17	1.98e-15
CNAG_06385	860.665	-1.54049	0.182666	-8.43334	3.36e-17	1.98e-15
CNAG_03592	1437.91	-1.34619	0.159809	-8.42376	3.65e-17	2.13e-15
CNAG_04004	67824.9	-1.76012	0.209042	-8.4199	3.77e-17	2.19e-15
CNAG_03435	16664.5	-1.63579	0.194677	-8.40261	4.37e-17	2.52e-15
CNAG_01365	610.181	-1.42625	0.169872	-8.396	4.62e-17	2.64e-15
CNAG_06060	998.05	1.60189	0.191056	8.38442	5.1e-17	2.89e-15
CNAG_03452	608.862	-1.57239	0.188011	-8.36326	6.1e-17	3.44e-15
CNAG_01131	1312.76	1.69041	0.202224	8.35909	6.32e-17	3.53e-15
CNAG_02359	51915.3	-1.97933	0.23687	-8.3562	6.48e-17	3.59e-15
CNAG_05232	67811	-1.78338	0.213685	-8.34585	7.07e-17	3.89e-15
CNAG_07538	1139.38	1.71306	0.205529	8.33492	7.75e-17	4.24e-15
CNAG_07511	3784.83	-1.50724	0.181139	-8.32088	8.73e-17	4.74e-15
CNAG_02270	684.67	-1.48219	0.178373	-8.30951	9.61e-17	5.18e-15
CNAG_03298	6064.85	-1.42929	0.172206	-8.29986	1.04e-16	5.58e-15
CNAG_07851	5037.57	-1.86537	0.225007	-8.29029	1.13e-16	6e-15
CNAG_03951	2692.46	-1.27697	0.154375	-8.2719	1.32e-16	6.96e-15
CNAG_05980	8023.49	-1.32824	0.161394	-8.22977	1.88e-16	9.83e-15
CNAG_03346	252.574	1.75627	0.2135	8.22611	1.93e-16	1.01e-14
CNAG_06121	978.644	1.83911	0.224316	8.19875	2.43e-16	1.26e-14
CNAG_01138	3741.54	-1.23334	0.151039	-8.16571	3.2e-16	1.64e-14
CNAG_01772	1994.69	-1.36527	0.167358	-8.15781	3.41e-16	1.74e-14
CNAG_02830	2802.83	-1.38038	0.169424	-8.14748	3.72e-16	1.88e-14
CNAG_01117	40113.4	-1.23017	0.151526	-8.11849	4.72e-16	2.37e-14
CNAG_07802	186.177	2.60197	0.322056	8.07927	6.52e-16	3.26e-14
CNAG_04976	13668	-1.28598	0.15952	-8.06157	7.53e-16	3.74e-14
CNAG_00869	274.017	-1.89975	0.236416	-8.0356	9.31e-16	4.59e-14
CNAG_01181	43897	-1.65911	0.207071	-8.01225	1.13e-15	5.52e-14
CNAG_05741	1490.52	-1.27444	0.159183	-8.00613	1.18e-15	5.76e-14
CNAG_00655	38969.3	-1.71761	0.215531	-7.96921	1.6e-15	7.72e-14
CNAG_06489	9080.59	-1.33804	0.167975	-7.9657	1.64e-15	7.9e-14
CNAG_01253	2215.78	-1.41939	0.178426	-7.95503	1.79e-15	8.55e-14
CNAG_01090	310.843	1.78485	0.224487	7.95076	1.85e-15	8.8e-14
CNAG_01404	11857.8	-1.23211	0.155004	-7.94889	1.88e-15	8.88e-14
CNAG_02851	1178.44	-1.37798	0.174017	-7.91863	2.4e-15	1.13e-13
CNAG_02202	3954.45	-1.25657	0.159339	-7.88615	3.12e-15	1.45e-13
CNAG_00808	3928.27	-1.30518	0.165644	-7.87947	3.29e-15	1.52e-13
CNAG_06021	1615.76	1.56511	0.198962	7.86634	3.65e-15	1.68e-13
CNAG_03311	4562.07	-1.19547	0.15202	-7.86389	3.72e-15	1.7e-13
CNAG_05831	319.647	-1.62136	0.20639	-7.85578	3.97e-15	1.81e-13
CNAG_04237	1470.59	-1.56234	0.200156	-7.8056	5.92e-15	2.68e-13
CNAG_02546	6103.54	-1.31416	0.168574	-7.79573	6.4e-15	2.88e-13
CNAG_04280	141.364	1.94761	0.249967	7.79147	6.62e-15	2.96e-13
CNAG_03920	3694.34	-1.38879	0.178349	-7.78693	6.87e-15	3.05e-13
CNAG_06638	5041.15	-1.08379	0.139254	-7.78278	7.09e-15	3.13e-13
CNAG_03400	343.306	1.97474	0.25422	7.76784	7.98e-15	3.5e-13
CNAG_04985	17474.3	-1.53904	0.19888	-7.73853	1.01e-14	4.39e-13
CNAG_07476	120.768	2.07801	0.26888	7.72841	1.09e-14	4.72e-13
CNAG_05732	433.965	-1.58224	0.205075	-7.71544	1.21e-14	5.2e-13
CNAG_01812	4515.12	-1.36275	0.176751	-7.70999	1.26e-14	5.39e-13
CNAG_06101	107590	-1.38345	0.179497	-7.70737	1.28e-14	5.48e-13
CNAG_01796	118.345	2.26334	0.294682	7.68062	1.58e-14	6.71e-13
CNAG_04168	3187.6	-2.02463	0.26363	-7.67983	1.59e-14	6.72e-13
CNAG_05144	6141.79	-1.49309	0.194485	-7.67715	1.63e-14	6.82e-13
CNAG_00696	388.535	1.50974	0.197227	7.6548	1.94e-14	8.07e-13
CNAG_03015	16151.6	-1.7545	0.229464	-7.64607	2.07e-14	8.59e-13
CNAG_05028	3643.3	-1.34768	0.176406	-7.63962	2.18e-14	8.98e-13
CNAG_03196	2666.5	-1.58327	0.208426	-7.59628	3.05e-14	1.25e-12
CNAG_04400	2571.91	-1.23486	0.162732	-7.58832	3.24e-14	1.32e-12
CNAG_02257	14996.6	-1.35593	0.178756	-7.58534	3.32e-14	1.35e-12
CNAG_02209	7174.48	-1.34463	0.177449	-7.57755	3.52e-14	1.42e-12
CNAG_03476	8039.03	-1.39023	0.183547	-7.57423	3.61e-14	1.45e-12
CNAG_02961	9548.67	-1.63258	0.21695	-7.52512	5.27e-14	2.1e-12
CNAG_01168	10622.8	-1.40164	0.186301	-7.52353	5.33e-14	2.12e-12
CNAG_01364	3920.47	-1.13807	0.151395	-7.51721	5.6e-14	2.21e-12
CNAG_04601	14849.2	-1.16298	0.154978	-7.50415	6.18e-14	2.43e-12
CNAG_05839	7752.62	-1.51331	0.201906	-7.49514	6.62e-14	2.59e-12
CNAG_06509	180.703	1.80778	0.241718	7.4789	7.49e-14	2.92e-12
CNAG_01111	5516.95	-1.30979	0.176247	-7.43159	1.07e-13	4.15e-12
CNAG_07310	1700.73	-1.58232	0.213007	-7.42852	1.1e-13	4.23e-12
CNAG_03165	4717.85	-1.44896	0.195213	-7.42242	1.15e-13	4.41e-12
CNAG_03294	151.821	1.83177	0.246828	7.42127	1.16e-13	4.42e-12
CNAG_02230	1652.5	1.70135	0.229358	7.4179	1.19e-13	4.51e-12
CNAG_01657	6028.01	-1.32435	0.178954	-7.40052	1.36e-13	5.12e-12
CNAG_02440	2879.62	1.50893	0.203926	7.39941	1.37e-13	5.14e-12
CNAG_00424	1490.74	-1.1185	0.151218	-7.39665	1.4e-13	5.22e-12
CNAG_02812	3483.04	-1.1914	0.161161	-7.39258	1.44e-13	5.35e-12
CNAG_00418	7319.74	-1.50065	0.20354	-7.37276	1.67e-13	6.18e-12
CNAG_06314	6732.53	-1.15655	0.157059	-7.36382	1.79e-13	6.58e-12
CNAG_02054	1927.77	-1.13761	0.154914	-7.34349	2.08e-13	7.62e-12
CNAG_05935	4931.54	-1.16692	0.15899	-7.33956	2.14e-13	7.81e-12
CNAG_03441	2915.78	-1.35441	0.18491	-7.3247	2.39e-13	8.69e-12
CNAG_04259	5291.24	-1.62365	0.222239	-7.30589	2.75e-13	9.94e-12
CNAG_06443	36252.5	1.5298	0.209877	7.28905	3.12e-13	1.12e-11
CNAG_02382	3543.01	-1.308	0.179524	-7.28593	3.19e-13	1.14e-11
CNAG_01737	3590.22	-1.23437	0.169648	-7.27609	3.44e-13	1.22e-11
CNAG_07943	560.067	1.67765	0.230784	7.26936	3.61e-13	1.28e-11
CNAG_03861	16342.1	-1.32137	0.182027	-7.25923	3.89e-13	1.37e-11
CNAG_02505	508.505	1.45735	0.201135	7.24562	4.3e-13	1.51e-11
CNAG_03817	3272.79	-1.3531	0.186822	-7.24275	4.4e-13	1.54e-11
CNAG_01348	1425.44	2.21184	0.305811	7.2327	4.73e-13	1.65e-11
CNAG_01416	1312.14	-1.20249	0.166314	-7.23021	4.82e-13	1.67e-11
CNAG_07752	1486.79	-1.12871	0.156271	-7.22275	5.09e-13	1.76e-11
CNAG_02762	17028.4	-1.47744	0.205235	-7.19875	6.08e-13	2.08e-11
CNAG_05091	3279.8	-1.25397	0.174253	-7.19627	6.19e-13	2.11e-11
CNAG_01204	29466	-1.3454	0.187561	-7.17316	7.33e-13	2.49e-11
CNAG_06168	3695.31	-1.38141	0.192659	-7.1702	7.49e-13	2.53e-11
CNAG_04467	404	-1.34829	0.188342	-7.15874	8.14e-13	2.74e-11
CNAG_01590	2606.56	-1.25679	0.175691	-7.15341	8.46e-13	2.84e-11
CNAG_00538	2407.88	-1.32037	0.184682	-7.14941	8.72e-13	2.91e-11
CNAG_02416	4838.78	-1.3423	0.187922	-7.14288	9.14e-13	3.04e-11
CNAG_00019	3795.53	-1.37053	0.191957	-7.13976	9.35e-13	3.09e-11
CNAG_07487	25585	-1.45152	0.203435	-7.13503	9.68e-13	3.19e-11
CNAG_06407	12575.7	-1.30456	0.183091	-7.12524	1.04e-12	3.41e-11
CNAG_04179	8691.49	-1.18331	0.166144	-7.12219	1.06e-12	3.46e-11
CNAG_03793	1183.13	-1.41798	0.199103	-7.12186	1.06e-12	3.46e-11
CNAG_05402	2094.89	-1.3582	0.191241	-7.10204	1.23e-12	3.98e-11
CNAG_05509	2254.95	-1.17722	0.166216	-7.08248	1.42e-12	4.57e-11
CNAG_02044	135.266	2.4419	0.344889	7.08023	1.44e-12	4.61e-11
CNAG_00997	2173.81	-1.65428	0.233654	-7.08002	1.44e-12	4.61e-11
CNAG_02294	2450.84	-1.09416	0.154624	-7.07626	1.48e-12	4.72e-11
CNAG_07502	6070.01	-1.18239	0.167339	-7.06585	1.6e-12	5.06e-11
CNAG_01262	410.018	-1.32563	0.187732	-7.06127	1.65e-12	5.21e-11
CNAG_03961	2785.08	-1.31822	0.187502	-7.03046	2.06e-12	6.47e-11
CNAG_06386	2611.15	-1.25754	0.178892	-7.0296	2.07e-12	6.49e-11
CNAG_02935	626.119	-1.40916	0.200582	-7.02538	2.13e-12	6.66e-11
CNAG_00060	1216.34	-1.25222	0.178509	-7.01489	2.3e-12	7.15e-11
CNAG_05762	39077.1	-1.76028	0.251596	-6.99646	2.63e-12	8.11e-11
CNAG_01890	24551.6	-1.24501	0.17796	-6.99603	2.63e-12	8.11e-11
CNAG_04628	3843.59	-1.15741	0.165556	-6.99105	2.73e-12	8.37e-11
CNAG_06274	19955	-1.65597	0.236944	-6.98887	2.77e-12	8.47e-11
CNAG_02838	2473.86	-1.26204	0.180651	-6.98608	2.83e-12	8.6e-11
CNAG_05455	9216.69	-1.47403	0.211205	-6.97915	2.97e-12	9e-11
CNAG_04683	2525	-1.43308	0.205387	-6.97749	3e-12	9.07e-11
CNAG_01596	2619.11	-1.13134	0.162188	-6.97548	3.05e-12	9.16e-11
CNAG_02466	114.388	2.12002	0.304226	6.96856	3.2e-12	9.59e-11
CNAG_01586	25803	-1.38645	0.199242	-6.95863	3.44e-12	1.02e-10
CNAG_00697	3298.97	-0.996884	0.143393	-6.95213	3.6e-12	1.07e-10
CNAG_00639	566.615	-1.3655	0.196642	-6.9441	3.81e-12	1.13e-10
CNAG_04635	1832.58	1.51667	0.218548	6.93979	3.93e-12	1.16e-10
CNAG_12153	54.9908	-2.88373	0.415839	-6.93473	4.07e-12	1.2e-10
CNAG_04114	42119.3	-1.30438	0.188517	-6.91918	4.54e-12	1.33e-10
CNAG_00894	10496	-1.55286	0.224906	-6.9045	5.04e-12	1.47e-10
CNAG_00628	422.245	-1.2448	0.180313	-6.90354	5.07e-12	1.47e-10
CNAG_03898	1616.34	-1.29208	0.187173	-6.90312	5.09e-12	1.47e-10
CNAG_02813	1953.88	-1.12762	0.163441	-6.89929	5.23e-12	1.51e-10
CNAG_04606	421.546	1.60306	0.232567	6.89289	5.47e-12	1.57e-10
CNAG_02217	269.361	1.83463	0.266523	6.88359	5.84e-12	1.67e-10
CNAG_03439	9890.41	-1.15026	0.167249	-6.8775	6.09e-12	1.73e-10
CNAG_05059	12449.7	-1.33287	0.193843	-6.87602	6.15e-12	1.75e-10
CNAG_05576	986.987	-1.30228	0.189433	-6.87463	6.21e-12	1.76e-10
CNAG_06605	40076.7	-1.41729	0.20638	-6.86737	6.54e-12	1.84e-10
CNAG_06563	8756.57	-1.02804	0.149768	-6.86424	6.68e-12	1.88e-10
CNAG_02914	3157.25	-1.29106	0.188354	-6.85443	7.16e-12	2e-10
CNAG_01187	2771.75	-1.10849	0.161887	-6.84731	7.53e-12	2.1e-10
CNAG_05273	1669.05	-1.44242	0.211343	-6.82499	8.79e-12	2.44e-10
CNAG_02842	3925.1	-1.14552	0.168015	-6.81798	9.23e-12	2.55e-10
CNAG_00747	5382.1	-1.23987	0.181892	-6.81656	9.32e-12	2.57e-10
CNAG_06775	4794.45	-1.04347	0.153264	-6.8083	9.88e-12	2.71e-10
CNAG_03098	2409.59	-1.48581	0.218308	-6.80605	1e-11	2.74e-10
CNAG_04452	2712.77	-1.39942	0.206146	-6.78847	1.13e-11	3.09e-10
CNAG_06085	1126.71	1.38961	0.204953	6.78016	1.2e-11	3.26e-10
CNAG_01897	2734.03	-1.20309	0.177547	-6.77615	1.23e-11	3.34e-10
CNAG_01236	4296.99	-1.27107	0.187645	-6.77379	1.25e-11	3.38e-10
CNAG_02060	1475.64	-1.73414	0.25634	-6.76499	1.33e-11	3.56e-10
CNAG_00573	3707.69	-1.19183	0.176177	-6.76496	1.33e-11	3.56e-10
CNAG_02788	518.725	-1.29225	0.191029	-6.76469	1.34e-11	3.56e-10
CNAG_05841	281.11	1.44181	0.213228	6.76184	1.36e-11	3.62e-10
CNAG_12827	1968.22	-1.26052	0.186447	-6.76074	1.37e-11	3.63e-10
CNAG_04980	1033.84	-1.26015	0.186395	-6.76062	1.37e-11	3.63e-10
CNAG_05596	7387.36	-1.16666	0.17265	-6.75734	1.41e-11	3.7e-10
CNAG_05294	824.605	1.11703	0.16541	6.75313	1.45e-11	3.79e-10
CNAG_05497	7090.13	-1.12935	0.167375	-6.7474	1.51e-11	3.93e-10
CNAG_05981	346.394	-1.40851	0.209191	-6.73316	1.66e-11	4.32e-10
CNAG_06839	2239.03	-1.0352	0.154047	-6.72003	1.82e-11	4.7e-10
CNAG_04724	704.198	1.16039	0.17268	6.7199	1.82e-11	4.7e-10
CNAG_04292	4539.83	-1.13691	0.169237	-6.71784	1.84e-11	4.75e-10
CNAG_02934	76.4827	2.50886	0.373539	6.71646	1.86e-11	4.78e-10
CNAG_02880	19060.9	-1.13708	0.169705	-6.70034	2.08e-11	5.32e-10
CNAG_07535	1886.84	-1.18805	0.177721	-6.6849	2.31e-11	5.89e-10
CNAG_01049	3046.47	-1.28966	0.193953	-6.64933	2.94e-11	7.48e-10
CNAG_01743	748.977	2.19057	0.331147	6.61508	3.71e-11	9.4e-10
CNAG_06138	5615.26	-1.31908	0.19957	-6.60962	3.85e-11	9.72e-10
CNAG_03596	5605.93	-1.04055	0.1576	-6.60247	4.04e-11	1.02e-09
CNAG_13046	78.8026	2.46975	0.374243	6.59931	4.13e-11	1.04e-09
CNAG_00162	335.208	1.63829	0.248576	6.59071	4.38e-11	1.09e-09
CNAG_07801	1488.07	-1.36249	0.206802	-6.58839	4.45e-11	1.11e-09
CNAG_01990	33336.5	-1.23977	0.188239	-6.58615	4.51e-11	1.12e-09
CNAG_04709	6158.07	-1.09376	0.166356	-6.57481	4.87e-11	1.21e-09
CNAG_00092	4159.05	-1.09856	0.167487	-6.55905	5.42e-11	1.34e-09
CNAG_02938	10787.4	-1.39516	0.212785	-6.55667	5.5e-11	1.35e-09
CNAG_06767	20499.1	-1.3564	0.206984	-6.55313	5.63e-11	1.38e-09
CNAG_05115	1678.23	-1.39506	0.213048	-6.54811	5.83e-11	1.42e-09
CNAG_01797	3304.87	-1.12454	0.172346	-6.5249	6.8e-11	1.66e-09
CNAG_04954	717.048	1.61077	0.247164	6.51703	7.17e-11	1.74e-09
CNAG_01598	3282.52	-1.08041	0.165816	-6.51573	7.23e-11	1.75e-09
CNAG_06273	5180.65	-1.22077	0.187394	-6.51446	7.29e-11	1.76e-09
CNAG_03457	6308.9	-1.01913	0.156449	-6.51411	7.31e-11	1.76e-09
CNAG_01636	1186.31	-1.26968	0.195146	-6.50634	7.7e-11	1.84e-09
CNAG_03919	1122.62	-1.24211	0.191171	-6.4974	8.17e-11	1.95e-09
CNAG_00546	1034.55	1.17187	0.180622	6.48798	8.7e-11	2.07e-09
CNAG_00919	1022.25	1.31106	0.202081	6.4878	8.71e-11	2.07e-09
CNAG_05633	3477.76	-1.20766	0.186267	-6.48348	8.96e-11	2.12e-09
CNAG_00897	2664.6	1.20225	0.185781	6.47131	9.72e-11	2.29e-09
CNAG_05069	6275.58	-1.40209	0.21685	-6.46572	1.01e-10	2.37e-09
CNAG_02002	5140.29	-1.23124	0.190668	-6.45748	1.06e-10	2.49e-09
CNAG_06374	255.03	-1.21622	0.188778	-6.44261	1.17e-10	2.74e-09
CNAG_12511	88.5096	2.09914	0.326253	6.43409	1.24e-10	2.89e-09
CNAG_02037	4042.58	-1.0617	0.165331	-6.42163	1.35e-10	3.13e-09
CNAG_03342	3525.97	-1.06203	0.165419	-6.42024	1.36e-10	3.15e-09
CNAG_02923	2856.32	-1.23025	0.191651	-6.41921	1.37e-10	3.16e-09
CNAG_04037	2285.7	-1.11922	0.174504	-6.41374	1.42e-10	3.27e-09
CNAG_05267	5035.59	-1.44527	0.225507	-6.40896	1.47e-10	3.36e-09
CNAG_02443	4509.02	-1.35462	0.211399	-6.40786	1.48e-10	3.37e-09
CNAG_01021	4300.62	-1.04922	0.164065	-6.39514	1.6e-10	3.66e-09
CNAG_12489	1010.34	-1.33377	0.209342	-6.37123	1.88e-10	4.26e-09
CNAG_05915	336.169	1.71488	0.269334	6.36712	1.93e-10	4.36e-09
CNAG_02327	1765.33	-1.11974	0.176036	-6.36084	2.01e-10	4.53e-09
CNAG_04873	226.384	1.34334	0.211259	6.35871	2.03e-10	4.58e-09
CNAG_02523	533.676	1.15861	0.182294	6.35574	2.07e-10	4.66e-09
CNAG_01884	54189.7	-1.40855	0.221862	-6.34879	2.17e-10	4.86e-09
CNAG_01688	3089.7	-1.02127	0.160903	-6.34709	2.19e-10	4.9e-09
CNAG_01198	4844.43	-1.53207	0.241594	-6.3415	2.28e-10	5.07e-09
CNAG_06545	2535.85	-1.10421	0.174331	-6.33398	2.39e-10	5.3e-09
CNAG_02007	9465.42	-1.13484	0.179508	-6.32196	2.58e-10	5.72e-09
CNAG_00417	27723	-1.15274	0.182373	-6.32078	2.6e-10	5.74e-09
CNAG_07493	276.821	2.0952	0.331656	6.31739	2.66e-10	5.85e-09
CNAG_01059	260.421	1.32976	0.21069	6.31147	2.76e-10	6.06e-09
CNAG_01856	224.474	1.65136	0.26188	6.30578	2.87e-10	6.27e-09
CNAG_01506	118.878	1.84968	0.293508	6.30198	2.94e-10	6.41e-09
CNAG_04082	7806.86	-1.03517	0.164291	-6.30086	2.96e-10	6.44e-09
CNAG_03856	5310.16	1.1651	0.184978	6.2986	3e-10	6.51e-09
CNAG_02164	577.202	1.29511	0.206079	6.28454	3.29e-10	7.11e-09
CNAG_07745	281.054	2.16464	0.344904	6.27605	3.47e-10	7.49e-09
CNAG_00722	3208.97	-1.26207	0.201208	-6.27249	3.55e-10	7.64e-09
CNAG_01974	1736.02	-0.966797	0.154229	-6.26858	3.64e-10	7.81e-09
CNAG_03293	2360.65	-1.3457	0.214835	-6.26387	3.76e-10	8.01e-09
CNAG_03392	232.932	1.29267	0.206372	6.26379	3.76e-10	8.01e-09
CNAG_03931	12420	-0.940574	0.150182	-6.2629	3.78e-10	8.03e-09
CNAG_07908	2769.65	-0.934178	0.149199	-6.26127	3.82e-10	8.09e-09
CNAG_05110	4470.69	-1.31402	0.210238	-6.25016	4.1e-10	8.67e-09
CNAG_07352	7420.55	-1.07961	0.172792	-6.24802	4.16e-10	8.76e-09
CNAG_03897	1258.58	-1.27101	0.203499	-6.24578	4.22e-10	8.86e-09
CNAG_04182	3507.27	-1.08249	0.173368	-6.24388	4.27e-10	8.95e-09
CNAG_01599	3716.73	-1.05932	0.169675	-6.24322	4.29e-10	8.96e-09
CNAG_02825	3266.76	-1.07754	0.172622	-6.24221	4.31e-10	8.99e-09
CNAG_00990	10981.2	-1.21845	0.195854	-6.22123	4.93e-10	1.03e-08
CNAG_01272	1612.28	1.45943	0.234629	6.22014	4.97e-10	1.03e-08
CNAG_01650	3096.63	-0.937148	0.150759	-6.21622	5.09e-10	1.05e-08
CNAG_02500	15677.7	1.34673	0.216901	6.20897	5.33e-10	1.1e-08
CNAG_05411	1112.65	1.25778	0.202582	6.20877	5.34e-10	1.1e-08
CNAG_01991	13948.9	-0.912866	0.147057	-6.20759	5.38e-10	1.1e-08
CNAG_01629	1129.83	-1.00781	0.162473	-6.20297	5.54e-10	1.13e-08
CNAG_05844	2986.57	-1.25816	0.202848	-6.20246	5.56e-10	1.13e-08
CNAG_02204	2316.7	-1.09072	0.176077	-6.19459	5.84e-10	1.19e-08
CNAG_03851	219.929	1.54524	0.249525	6.19273	5.91e-10	1.2e-08
CNAG_00972	1165.6	-1.15112	0.185892	-6.19241	5.93e-10	1.2e-08
CNAG_07855	3858.67	-1.09841	0.177382	-6.1923	5.93e-10	1.2e-08
CNAG_02316	3924.42	-0.902519	0.14585	-6.18799	6.09e-10	1.23e-08
CNAG_06282	374.581	1.35431	0.218982	6.18456	6.23e-10	1.25e-08
CNAG_01799	12475.9	-1.35364	0.219605	-6.16397	7.09e-10	1.42e-08
CNAG_06906	11893.6	-1.01329	0.164395	-6.16374	7.1e-10	1.42e-08
CNAG_01833	4640.62	-0.881681	0.143142	-6.15948	7.3e-10	1.45e-08
CNAG_05917	3578.9	-1.08109	0.175545	-6.15845	7.35e-10	1.46e-08
CNAG_00987	1811.85	-1.18625	0.192629	-6.15824	7.36e-10	1.46e-08
CNAG_05111	5337.76	-1.11091	0.180504	-6.15451	7.53e-10	1.49e-08
CNAG_03787	15858.8	-0.917256	0.149139	-6.15035	7.73e-10	1.52e-08
CNAG_07326	5962.41	-1.21626	0.197961	-6.14394	8.05e-10	1.58e-08
CNAG_03993	1491.88	-0.988168	0.160853	-6.14328	8.08e-10	1.58e-08
CNAG_00097	64.8874	2.34522	0.381952	6.14009	8.25e-10	1.61e-08
CNAG_01789	3647.08	-1.11932	0.18252	-6.13259	8.65e-10	1.69e-08
CNAG_05685	2205.34	-1.29913	0.212281	-6.11983	9.37e-10	1.82e-08
CNAG_06140	7716.82	-1.25489	0.205196	-6.11559	9.62e-10	1.87e-08
CNAG_00715	2977.99	-1.43409	0.234552	-6.11416	9.71e-10	1.88e-08
CNAG_03352	1216.46	-1.26838	0.207575	-6.11045	9.93e-10	1.92e-08
CNAG_05900	5676.86	-1.11927	0.183201	-6.1095	9.99e-10	1.92e-08
CNAG_05635	3262.73	-1.1957	0.195759	-6.10801	1.01e-09	1.94e-08
CNAG_00652	655.975	1.06612	0.174599	6.10609	1.02e-09	1.96e-08
CNAG_00854	2875.29	-0.933702	0.153272	-6.09178	1.12e-09	2.13e-08
CNAG_03913	770.235	1.78578	0.293281	6.08897	1.14e-09	2.17e-08
CNAG_01162	639.106	-1.0425	0.171508	-6.07847	1.21e-09	2.31e-08
CNAG_05024	169.603	1.43583	0.236294	6.07645	1.23e-09	2.33e-08
CNAG_05939	1204.05	3.50888	0.578174	6.06891	1.29e-09	2.44e-08
CNAG_00984	2311.42	3.81191	0.629645	6.05407	1.41e-09	2.66e-08
CNAG_00474	260.23	1.29901	0.214576	6.05385	1.41e-09	2.66e-08
CNAG_05197	6476.19	-1.31185	0.216727	-6.05302	1.42e-09	2.67e-08
CNAG_01666	2274.96	-1.36161	0.225252	-6.04481	1.5e-09	2.8e-08
CNAG_04763	317.835	1.54771	0.256345	6.03762	1.56e-09	2.92e-08
CNAG_05309	1018.38	-1.17793	0.195173	-6.03533	1.59e-09	2.96e-08
CNAG_02145	2506.65	-1.10715	0.183565	-6.03138	1.63e-09	3.02e-08
CNAG_07676	6447.45	-1.30422	0.216259	-6.03083	1.63e-09	3.02e-08
CNAG_00700	5739.38	-1.06117	0.176148	-6.02432	1.7e-09	3.14e-08
CNAG_02315	25461.4	-0.991392	0.164636	-6.02173	1.73e-09	3.18e-08
CNAG_05507	2582.18	-1.24967	0.207574	-6.02036	1.74e-09	3.2e-08
CNAG_01470	8676.44	-1.07891	0.179309	-6.01701	1.78e-09	3.26e-08
CNAG_04934	1626.82	1.41305	0.234991	6.01322	1.82e-09	3.33e-08
CNAG_02964	489.724	1.10897	0.18448	6.0113	1.84e-09	3.36e-08
CNAG_00444	571.679	-1.23666	0.205745	-6.01065	1.85e-09	3.37e-08
CNAG_04612	7351.15	-1.13136	0.188409	-6.00482	1.92e-09	3.48e-08
CNAG_00192	784.127	1.14802	0.19121	6.00398	1.93e-09	3.49e-08
CNAG_05105	7478.37	-1.02036	0.170221	-5.99432	2.04e-09	3.7e-08
CNAG_00973	844.909	-1.08675	0.181324	-5.9934	2.06e-09	3.71e-08
CNAG_02916	16598.2	-1.1431	0.191143	-5.98033	2.23e-09	4.01e-08
CNAG_01821	735.673	1.28118	0.214421	5.97506	2.3e-09	4.13e-08
CNAG_00486	1940.54	-1.16799	0.19584	-5.96402	2.46e-09	4.41e-08
CNAG_02901	2263.25	-1.15267	0.193325	-5.96236	2.49e-09	4.45e-08
CNAG_06436	289.433	-1.30113	0.218329	-5.95948	2.53e-09	4.51e-08
CNAG_06739	1408.84	-1.07313	0.180231	-5.95419	2.61e-09	4.65e-08
CNAG_00138	2484.09	-0.932568	0.156708	-5.95099	2.67e-09	4.73e-08
CNAG_01113	2130.29	-1.05196	0.176787	-5.95042	2.67e-09	4.74e-08
CNAG_02182	8371.45	1.65407	0.27808	5.94819	2.71e-09	4.79e-08
CNAG_02403	5690.55	-1.32144	0.222263	-5.94539	2.76e-09	4.86e-08
CNAG_06919	6387.69	-0.919056	0.154655	-5.94262	2.81e-09	4.93e-08
CNAG_06902	207.72	-1.57864	0.265807	-5.93902	2.87e-09	5.03e-08
CNAG_00386	3296.3	-1.09194	0.183993	-5.93472	2.94e-09	5.15e-08
CNAG_01174	1436.72	1.04353	0.176337	5.91782	3.26e-09	5.7e-08
CNAG_04994	1307.67	-1.29303	0.21853	-5.91693	3.28e-09	5.72e-08
CNAG_00288	857.872	-1.01263	0.171186	-5.9154	3.31e-09	5.76e-08
CNAG_02301	6629.23	-1.24974	0.211314	-5.91416	3.34e-09	5.79e-08
CNAG_00132	95.5794	1.71451	0.290112	5.90982	3.42e-09	5.93e-08
CNAG_07998	248.894	1.22022	0.20653	5.90821	3.46e-09	5.97e-08
CNAG_06226	3020.37	-1.31108	0.222075	-5.90376	3.55e-09	6.12e-08
CNAG_05997	8692.13	-1.11449	0.188863	-5.90106	3.61e-09	6.21e-08
CNAG_06541	660.062	-1.52194	0.257932	-5.90055	3.62e-09	6.21e-08
CNAG_03456	1301.31	-0.966303	0.163862	-5.89707	3.7e-09	6.33e-08
CNAG_06799	3742.58	-1.03802	0.176061	-5.89577	3.73e-09	6.37e-08
CNAG_03560	116.126	1.47036	0.249428	5.89493	3.75e-09	6.38e-08
CNAG_04178	269.741	-1.30331	0.2211	-5.89465	3.75e-09	6.38e-08
CNAG_01750	2558.96	1.50083	0.254718	5.8921	3.81e-09	6.47e-08
CNAG_02656	1642.39	-1.10666	0.187854	-5.89106	3.84e-09	6.49e-08
CNAG_03738	541.663	-1.01417	0.172266	-5.88724	3.93e-09	6.63e-08
CNAG_04378	5808.49	-1.19764	0.203467	-5.8862	3.95e-09	6.64e-08
CNAG_00638	536.287	-1.10752	0.188156	-5.88615	3.95e-09	6.64e-08
CNAG_05132	12212	-1.02864	0.174852	-5.88293	4.03e-09	6.76e-08
CNAG_02918	4403.86	-1.19961	0.203968	-5.88135	4.07e-09	6.81e-08
CNAG_02398	188.64	-1.69208	0.287725	-5.88088	4.08e-09	6.81e-08
CNAG_03300	2446.1	-1.08208	0.184012	-5.8805	4.09e-09	6.81e-08
CNAG_03844	476.272	1.29851	0.220865	5.87923	4.12e-09	6.85e-08
CNAG_00536	3432.31	-1.3659	0.232397	-5.87744	4.17e-09	6.91e-08
CNAG_03599	354.411	-1.29697	0.220682	-5.87711	4.17e-09	6.91e-08
CNAG_03789	3046.77	-0.914772	0.155687	-5.8757	4.21e-09	6.95e-08
CNAG_06113	43387.4	-1.19769	0.203925	-5.87318	4.28e-09	7.04e-08
CNAG_02898	3195.48	-1.02837	0.175129	-5.87207	4.3e-09	7.07e-08
CNAG_04851	8272	1.25732	0.214129	5.87181	4.31e-09	7.07e-08
CNAG_06318	2852.7	-1.17055	0.199366	-5.87138	4.32e-09	7.07e-08
CNAG_04326	356.966	1.55811	0.265396	5.87091	4.33e-09	7.08e-08
CNAG_05572	349.358	-1.29045	0.219825	-5.87038	4.35e-09	7.09e-08
CNAG_06734	763.635	-1.16893	0.199163	-5.8692	4.38e-09	7.12e-08
CNAG_05434	4126.66	-1.15981	0.197648	-5.86808	4.41e-09	7.15e-08
CNAG_05515	1311.44	1.17496	0.200426	5.86233	4.56e-09	7.39e-08
CNAG_03669	808.748	1.08197	0.184572	5.86206	4.57e-09	7.39e-08
CNAG_05614	1448.43	-1.07612	0.183616	-5.86072	4.61e-09	7.43e-08
CNAG_04098	263.958	1.24753	0.213029	5.85613	4.74e-09	7.62e-08
CNAG_05798	1295.5	-1.2088	0.206493	-5.85395	4.8e-09	7.71e-08
CNAG_03326	727.392	1.21443	0.207478	5.8533	4.82e-09	7.72e-08
CNAG_12915	170.066	-1.29342	0.221706	-5.83392	5.41e-09	8.66e-08
CNAG_03007	4930.69	1.61353	0.276712	5.83108	5.51e-09	8.79e-08
CNAG_01564	2601.09	-1.12775	0.193477	-5.82887	5.58e-09	8.88e-08
CNAG_04664	1902.29	-1.04166	0.178855	-5.82402	5.74e-09	9.13e-08
CNAG_05907	4385.76	-0.994311	0.170834	-5.82035	5.87e-09	9.31e-08
CNAG_03359	3057.15	-1.37506	0.236324	-5.81853	5.94e-09	9.39e-08
CNAG_03682	19793.2	-1.14936	0.19774	-5.81247	6.16e-09	9.72e-08
CNAG_03115	276.265	1.53928	0.264852	5.81185	6.18e-09	9.73e-08
CNAG_06338	289.133	1.30273	0.224216	5.81014	6.24e-09	9.79e-08
CNAG_06007	2186.41	-1.10696	0.190522	-5.81013	6.24e-09	9.79e-08
CNAG_01179	3671.45	-1.00943	0.173817	-5.80742	6.34e-09	9.93e-08
CNAG_05623	4836.71	-1.02888	0.177343	-5.80164	6.57e-09	1.03e-07
CNAG_07695	2002.25	-1.52456	0.262994	-5.79692	6.75e-09	1.05e-07
CNAG_00788	12293.4	-0.986918	0.17032	-5.7945	6.85e-09	1.07e-07
CNAG_00534	10565.8	-1.17885	0.20347	-5.79376	6.88e-09	1.07e-07
CNAG_06108	916.069	-1.07785	0.186175	-5.78945	7.06e-09	1.09e-07
CNAG_02687	2406.67	-0.965101	0.166777	-5.78677	7.18e-09	1.11e-07
CNAG_01092	2807.24	-0.868066	0.150093	-5.78352	7.32e-09	1.13e-07
CNAG_05918	74041.9	-0.931984	0.161385	-5.7749	7.7e-09	1.19e-07
CNAG_03822	1104.27	-1.15178	0.199475	-5.77408	7.74e-09	1.19e-07
CNAG_00499	1095.29	-1.146	0.198692	-5.76772	8.03e-09	1.23e-07
CNAG_02178	196.908	1.48787	0.257976	5.76747	8.05e-09	1.23e-07
CNAG_07424	2441.47	-1.22811	0.213004	-5.76568	8.13e-09	1.24e-07
CNAG_01972	857.828	0.960735	0.166707	5.76303	8.26e-09	1.26e-07
CNAG_04836	366.748	1.06313	0.184477	5.76292	8.27e-09	1.26e-07
CNAG_03636	1691.12	-0.972803	0.168898	-5.7597	8.43e-09	1.28e-07
CNAG_02833	4167.75	-1.24202	0.215711	-5.75777	8.52e-09	1.29e-07
CNAG_07555	237.113	1.28743	0.223613	5.7574	8.54e-09	1.29e-07
CNAG_03048	1252.7	-1.16861	0.203239	-5.74994	8.93e-09	1.35e-07
CNAG_00304	608.434	-1.06266	0.18489	-5.74752	9.06e-09	1.36e-07
CNAG_12320	212.428	-1.62521	0.283094	-5.74091	9.42e-09	1.42e-07
CNAG_03483	1722.36	-1.00938	0.175864	-5.73955	9.49e-09	1.42e-07
CNAG_06134	5857.3	1.05625	0.184068	5.73835	9.56e-09	1.43e-07
CNAG_01080	203.089	1.37355	0.239369	5.73823	9.57e-09	1.43e-07
CNAG_01424	361.656	1.10895	0.193337	5.73584	9.7e-09	1.45e-07
CNAG_12951	83.306	1.66264	0.289952	5.73421	9.8e-09	1.46e-07
CNAG_00519	1123.34	-1.1373	0.198399	-5.73239	9.9e-09	1.47e-07
CNAG_02064	1220.52	-0.919295	0.160439	-5.72987	1.01e-08	1.49e-07
CNAG_05216	853.731	0.951158	0.166092	5.72668	1.02e-08	1.52e-07
CNAG_04287	3279.35	-0.895131	0.156444	-5.72172	1.05e-08	1.56e-07
CNAG_04920	376.426	1.18066	0.206405	5.72012	1.06e-08	1.57e-07
CNAG_03322	7827.74	-1.01789	0.178066	-5.71635	1.09e-08	1.6e-07
CNAG_05317	475.449	1.11962	0.195907	5.71507	1.1e-08	1.61e-07
CNAG_00332	511.584	1.14509	0.200671	5.70631	1.15e-08	1.69e-07
CNAG_04935	1312.86	-0.903055	0.158374	-5.70204	1.18e-08	1.73e-07
CNAG_06758	820.871	0.989337	0.173574	5.69978	1.2e-08	1.75e-07
CNAG_05751	4465.27	-1.10979	0.194723	-5.69933	1.2e-08	1.75e-07
CNAG_06484	146.713	1.30349	0.228836	5.69619	1.23e-08	1.78e-07
CNAG_03065	6625.44	-1.08656	0.190808	-5.69451	1.24e-08	1.8e-07
CNAG_00284	157.774	1.28532	0.22579	5.69253	1.25e-08	1.81e-07
CNAG_01137	5665.9	-1.2315	0.216388	-5.69118	1.26e-08	1.82e-07
CNAG_06353	1941.16	-1.02061	0.179398	-5.68911	1.28e-08	1.84e-07
CNAG_01120	10511.6	-1.10956	0.195035	-5.68902	1.28e-08	1.84e-07
CNAG_03693	2692.56	-1.11644	0.196251	-5.68883	1.28e-08	1.84e-07
CNAG_00247	80.3011	1.8961	0.333431	5.68662	1.3e-08	1.86e-07
CNAG_03226	7992.59	-0.861407	0.151598	-5.68218	1.33e-08	1.9e-07
CNAG_02677	3120.2	-0.902347	0.158843	-5.68074	1.34e-08	1.92e-07
CNAG_06645	2895.42	-0.942753	0.166177	-5.67318	1.4e-08	2e-07
CNAG_04030	863.058	-1.2068	0.212888	-5.66872	1.44e-08	2.05e-07
CNAG_07473	4582.52	-0.901921	0.159183	-5.66592	1.46e-08	2.08e-07
CNAG_02998	1009.56	-0.971241	0.171799	-5.65337	1.57e-08	2.23e-07
CNAG_01360	1708.32	1.04901	0.185564	5.65308	1.58e-08	2.23e-07
CNAG_00026	5241.6	-1.05913	0.187434	-5.65068	1.6e-08	2.26e-07
CNAG_03674	4388.71	-0.849227	0.150435	-5.64516	1.65e-08	2.33e-07
CNAG_02427	637.851	1.59541	0.283162	5.63427	1.76e-08	2.47e-07
CNAG_02421	4120.78	-1.04599	0.185904	-5.6265	1.84e-08	2.58e-07
CNAG_04951	6621.51	-0.94924	0.168861	-5.62143	1.89e-08	2.66e-07
CNAG_01609	1547.5	-1.00315	0.178479	-5.62054	1.9e-08	2.67e-07
CNAG_02657	6426.38	-1.09064	0.194088	-5.61933	1.92e-08	2.68e-07
CNAG_03204	463.626	1.10191	0.196239	5.61512	1.96e-08	2.74e-07
CNAG_06729	888.68	-0.917661	0.163707	-5.60552	2.08e-08	2.89e-07
CNAG_06663	8471.09	-0.854469	0.152452	-5.60485	2.08e-08	2.9e-07
CNAG_00871	107.587	1.43885	0.256757	5.60392	2.1e-08	2.91e-07
CNAG_07163	4681.32	-0.821694	0.146735	-5.59986	2.15e-08	2.97e-07
CNAG_02783	1283.32	-0.895259	0.159906	-5.59866	2.16e-08	2.99e-07
CNAG_06421	5832.92	-0.914372	0.163343	-5.59787	2.17e-08	2.99e-07
CNAG_02552	484.201	1.14245	0.204211	5.59445	2.21e-08	3.05e-07
CNAG_05854	1308.09	-0.89121	0.159621	-5.58328	2.36e-08	3.24e-07
CNAG_00039	686.054	1.14441	0.205076	5.58041	2.4e-08	3.29e-07
CNAG_00285	289.4	1.11698	0.200188	5.57966	2.41e-08	3.3e-07
CNAG_06272	716.322	0.993158	0.178151	5.57481	2.48e-08	3.39e-07
CNAG_04314	248.914	-1.16824	0.209877	-5.56629	2.6e-08	3.55e-07
CNAG_01033	788.79	-0.933727	0.167962	-5.55917	2.71e-08	3.69e-07
CNAG_04884	18819.2	-1.36459	0.245497	-5.55848	2.72e-08	3.7e-07
CNAG_05125	3449.94	-0.901376	0.162248	-5.55556	2.77e-08	3.76e-07
CNAG_01981	3677.91	-0.852108	0.153524	-5.55032	2.85e-08	3.86e-07
CNAG_00280	3718.68	-1.0685	0.192763	-5.5431	2.97e-08	4.01e-07
CNAG_06087	752.325	-1.05623	0.190549	-5.54309	2.97e-08	4.01e-07
CNAG_06897	2276.42	1.25237	0.225949	5.54271	2.98e-08	4.01e-07
CNAG_05827	6028.04	-0.882733	0.159278	-5.54207	2.99e-08	4.02e-07
CNAG_03049	3990.11	-1.05672	0.190675	-5.54199	2.99e-08	4.02e-07
CNAG_02266	8486.16	-0.864809	0.156426	-5.52855	3.23e-08	4.32e-07
CNAG_05711	457.066	-1.33369	0.241244	-5.52841	3.23e-08	4.32e-07
CNAG_01027	3808.28	-0.95933	0.1736	-5.52608	3.27e-08	4.37e-07
CNAG_04332	735.728	-0.904267	0.163667	-5.52506	3.29e-08	4.39e-07
CNAG_05909	25571.9	-1.0084	0.182587	-5.52286	3.34e-08	4.44e-07
CNAG_00283	280.717	1.23273	0.22323	5.52225	3.35e-08	4.45e-07
CNAG_08019	303.079	1.24745	0.22612	5.51674	3.45e-08	4.58e-07
CNAG_03562	581.358	-1.04694	0.189906	-5.51294	3.53e-08	4.67e-07
CNAG_01920	8983.17	1.13636	0.20617	5.51175	3.55e-08	4.7e-07
CNAG_05288	109.45	1.58638	0.287955	5.50913	3.61e-08	4.76e-07
CNAG_06471	1988.43	-0.952901	0.173129	-5.50398	3.71e-08	4.89e-07
CNAG_00930	14365.7	-0.969712	0.176219	-5.5029	3.74e-08	4.91e-07
CNAG_00135	866.643	-1.10049	0.200168	-5.49785	3.84e-08	5.05e-07
CNAG_06901	206.04	1.26496	0.230503	5.4878	4.07e-08	5.33e-07
CNAG_00509	7118.47	-1.06829	0.194772	-5.4848	4.14e-08	5.41e-07
CNAG_00462	2548.31	-0.894836	0.163153	-5.48466	4.14e-08	5.41e-07
CNAG_05962	175.233	1.55187	0.283132	5.48109	4.23e-08	5.51e-07
CNAG_03624	4730.8	-1.06705	0.194726	-5.47975	4.26e-08	5.54e-07
CNAG_03899	3552.08	1.00841	0.184037	5.47941	4.27e-08	5.54e-07
CNAG_07382	4800.86	-0.861355	0.15727	-5.47691	4.33e-08	5.61e-07
CNAG_01323	12436.2	-1.15417	0.210936	-5.47165	4.46e-08	5.77e-07
CNAG_00732	310.236	-1.20616	0.220654	-5.46631	4.6e-08	5.94e-07
CNAG_02531	235.683	1.23475	0.225908	5.46574	4.61e-08	5.95e-07
CNAG_00778	909.114	0.948657	0.173728	5.46061	4.75e-08	6.11e-07
CNAG_01607	2060.51	-1.14192	0.209312	-5.45556	4.88e-08	6.28e-07
CNAG_02502	2528.55	-1.08848	0.200107	-5.43948	5.34e-08	6.86e-07
CNAG_12093	1121.76	-1.35734	0.249557	-5.43898	5.36e-08	6.86e-07
CNAG_06482	471.624	1.06514	0.195837	5.43891	5.36e-08	6.86e-07
CNAG_04198	864.951	1.00317	0.184482	5.43776	5.4e-08	6.89e-07
CNAG_06472	2772.79	-1.19113	0.219087	-5.43677	5.43e-08	6.92e-07
CNAG_03509	4104.35	-0.981123	0.180478	-5.43626	5.44e-08	6.92e-07
CNAG_00413	2549.71	-0.882366	0.162549	-5.42829	5.69e-08	7.21e-07
CNAG_06622	117.228	1.51546	0.279185	5.42816	5.69e-08	7.21e-07
CNAG_01865	287.552	1.02371	0.188597	5.42802	5.7e-08	7.21e-07
CNAG_02486	4760.21	-0.964421	0.177683	-5.42775	5.71e-08	7.21e-07
CNAG_04045	2310.7	-0.900971	0.166138	-5.42303	5.86e-08	7.39e-07
CNAG_02512	421.667	1.09492	0.201948	5.42179	5.9e-08	7.43e-07
CNAG_04621	429.479	-1.02368	0.18918	-5.41113	6.26e-08	7.88e-07
CNAG_02176	872.867	1.08166	0.19993	5.41018	6.3e-08	7.91e-07
CNAG_02684	1002.31	0.915447	0.169382	5.40463	6.49e-08	8.14e-07
CNAG_03037	253.867	-1.74149	0.322251	-5.40415	6.51e-08	8.15e-07
CNAG_01644	1167.96	-0.868204	0.160766	-5.40041	6.65e-08	8.31e-07
CNAG_07359	906.032	0.871775	0.161447	5.39977	6.67e-08	8.32e-07
CNAG_03064	2882.51	-1.07183	0.198754	-5.39272	6.94e-08	8.64e-07
CNAG_06074	378.582	1.47481	0.27352	5.39198	6.97e-08	8.66e-07
CNAG_04156	3267.82	-0.895987	0.166222	-5.39029	7.03e-08	8.73e-07
CNAG_07619	411.601	1.13672	0.21099	5.38756	7.14e-08	8.85e-07
CNAG_02482	1636.2	-0.971998	0.180552	-5.38347	7.31e-08	9.04e-07
CNAG_05005	234.799	1.7212	0.32005	5.37792	7.53e-08	9.31e-07
CNAG_02952	1747.81	-1.03646	0.192828	-5.37507	7.66e-08	9.44e-07
CNAG_05712	9322.31	-1.00108	0.186254	-5.3748	7.67e-08	9.44e-07
CNAG_01354	2709.56	-1.12984	0.210292	-5.37271	7.76e-08	9.52e-07
CNAG_00065	6372.25	-1.01141	0.188252	-5.37265	7.76e-08	9.52e-07
CNAG_05234	2802.57	-1.4237	0.26515	-5.36943	7.9e-08	9.68e-07
CNAG_04844	8399.23	-0.903306	0.168255	-5.36866	7.93e-08	9.7e-07
CNAG_06412	2006.13	-0.899715	0.167661	-5.36627	8.04e-08	9.8e-07
CNAG_06577	424.023	1.33882	0.249492	5.36617	8.04e-08	9.8e-07
CNAG_06381	2348.03	-1.11207	0.207444	-5.3608	8.29e-08	1.01e-06
CNAG_05461	84.9627	1.56186	0.291436	5.35918	8.36e-08	1.02e-06
CNAG_00109	4190.4	-1.11919	0.208885	-5.35791	8.42e-08	1.02e-06
CNAG_02034	528.769	-1.16894	0.21819	-5.35745	8.44e-08	1.02e-06
CNAG_04652	1437.26	1.50166	0.280369	5.35602	8.51e-08	1.03e-06
CNAG_03843	726.622	0.890009	0.16624	5.35377	8.61e-08	1.04e-06
CNAG_06794	3016.4	-1.07964	0.202118	-5.34163	9.21e-08	1.11e-06
CNAG_00070	940.682	0.910649	0.170637	5.33676	9.46e-08	1.14e-06
CNAG_04212	5645.47	-1.10242	0.206607	-5.33586	9.51e-08	1.14e-06
CNAG_01946	434.587	-1.36175	0.25531	-5.33372	9.62e-08	1.15e-06
CNAG_06150	47726.5	1.03688	0.194545	5.32979	9.83e-08	1.18e-06
CNAG_03779	3048	-0.843141	0.158202	-5.3295	9.85e-08	1.18e-06
CNAG_03810	3021.99	-1.0065	0.188875	-5.32893	9.88e-08	1.18e-06
CNAG_04235	1707.27	-0.934729	0.175477	-5.3268	1e-07	1.19e-06
CNAG_06346	276.663	1.66862	0.313671	5.31964	1.04e-07	1.24e-06
CNAG_07687	78.3461	1.52205	0.286266	5.31691	1.06e-07	1.25e-06
CNAG_05892	2726.75	-0.910149	0.1712	-5.31628	1.06e-07	1.26e-06
CNAG_03708	2016.77	-1.02034	0.192082	-5.31201	1.08e-07	1.28e-06
CNAG_00399	1637.9	0.859309	0.161782	5.31154	1.09e-07	1.29e-06
CNAG_05858	1729.63	-1.0143	0.1911	-5.30767	1.11e-07	1.31e-06
CNAG_06344	1659.19	-1.09766	0.206904	-5.30516	1.13e-07	1.33e-06
CNAG_04744	967.94	1.59108	0.300165	5.30069	1.15e-07	1.36e-06
CNAG_00053	166.583	-1.37418	0.259374	-5.29805	1.17e-07	1.38e-06
CNAG_03239	465.508	-1.14173	0.21554	-5.29706	1.18e-07	1.38e-06
CNAG_02511	569.135	0.964411	0.182286	5.29066	1.22e-07	1.43e-06
CNAG_06658	566.621	0.985466	0.186703	5.27826	1.3e-07	1.53e-06
CNAG_04505	761.289	1.13844	0.215779	5.27594	1.32e-07	1.54e-06
CNAG_13142	376.813	-1.22577	0.232499	-5.27214	1.35e-07	1.57e-06
CNAG_01089	1154.03	-0.888211	0.168491	-5.27158	1.35e-07	1.58e-06
CNAG_07758	237.504	1.04996	0.199405	5.26545	1.4e-07	1.63e-06
CNAG_00936	852.546	0.9964	0.189394	5.261	1.43e-07	1.66e-06
CNAG_03828	160.656	1.28065	0.243453	5.26037	1.44e-07	1.67e-06
CNAG_00845	2183.73	-1.07166	0.203781	-5.2589	1.45e-07	1.68e-06
CNAG_04017	3204.68	1.24746	0.237223	5.2586	1.45e-07	1.68e-06
CNAG_03320	1519.36	1.19626	0.227853	5.25016	1.52e-07	1.75e-06
CNAG_04712	1042.1	-0.817806	0.156191	-5.23593	1.64e-07	1.89e-06
CNAG_05835	1149.05	0.888107	0.169754	5.23174	1.68e-07	1.93e-06
CNAG_04832	635.257	1.08658	0.207761	5.22995	1.7e-07	1.95e-06
CNAG_02508	1160.01	-1.15682	0.221345	-5.22634	1.73e-07	1.98e-06
CNAG_07550	160.875	1.45394	0.278371	5.22302	1.76e-07	2.02e-06
CNAG_03589	2170.35	-0.912076	0.174642	-5.22255	1.76e-07	2.02e-06
CNAG_04199	86.9513	1.5198	0.291092	5.22103	1.78e-07	2.03e-06
CNAG_01921	39.2846	-2.19345	0.420659	-5.21431	1.85e-07	2.1e-06
CNAG_03106	3278.2	-0.815479	0.156673	-5.20498	1.94e-07	2.21e-06
CNAG_12988	423.841	-1.45078	0.279182	-5.19653	2.03e-07	2.31e-06
CNAG_06657	244.652	1.15376	0.222084	5.19516	2.05e-07	2.32e-06
CNAG_06968	1054.91	-0.819284	0.157818	-5.19133	2.09e-07	2.37e-06
CNAG_04257	4350.71	-0.968228	0.186527	-5.19083	2.09e-07	2.37e-06
CNAG_07325	812.753	-1.07646	0.207611	-5.18499	2.16e-07	2.44e-06
CNAG_00419	28.5072	2.60836	0.503187	5.18369	2.18e-07	2.45e-06
CNAG_06830	4421.16	-0.725976	0.140163	-5.17952	2.22e-07	2.51e-06
CNAG_12869	127.712	-1.7973	0.347229	-5.17612	2.27e-07	2.55e-06
CNAG_02672	2584.34	-0.945695	0.182728	-5.17543	2.27e-07	2.55e-06
CNAG_04840	5956.05	-1.02277	0.197645	-5.17479	2.28e-07	2.56e-06
CNAG_04862	174.561	1.31928	0.255042	5.17281	2.31e-07	2.58e-06
CNAG_04286	2613.22	-0.866489	0.167559	-5.17124	2.33e-07	2.6e-06
CNAG_05012	219.567	1.32883	0.257199	5.16653	2.38e-07	2.66e-06
CNAG_06669	865.749	-1.03341	0.200301	-5.15928	2.48e-07	2.76e-06
CNAG_05367	2080.72	-0.881594	0.17093	-5.15764	2.5e-07	2.78e-06
CNAG_01739	671.355	0.921299	0.178712	5.15522	2.53e-07	2.81e-06
CNAG_06993	1170.9	-0.880369	0.170779	-5.15503	2.54e-07	2.81e-06
CNAG_02212	11609.5	-0.925964	0.17964	-5.15457	2.54e-07	2.82e-06
CNAG_06331	130.832	1.29561	0.251642	5.1486	2.62e-07	2.9e-06
CNAG_00255	1971.17	-1.01273	0.196826	-5.14534	2.67e-07	2.95e-06
CNAG_06748	1890.46	-0.90266	0.175473	-5.14416	2.69e-07	2.96e-06
CNAG_02351	617.843	0.946192	0.184003	5.14227	2.71e-07	2.99e-06
CNAG_04694	3672.84	-1.03552	0.201384	-5.14202	2.72e-07	2.99e-06
CNAG_01485	1654.03	-0.967825	0.188259	-5.14091	2.73e-07	3e-06
CNAG_06759	754.335	1.36053	0.264739	5.13916	2.76e-07	3.03e-06
CNAG_05588	660.911	1.19574	0.232731	5.13785	2.78e-07	3.04e-06
CNAG_04785	989.241	-1.13221	0.220408	-5.1369	2.79e-07	3.05e-06
CNAG_04824	588.43	-1.0939	0.213282	-5.12888	2.91e-07	3.18e-06
CNAG_03814	3613.04	-0.807916	0.15753	-5.12866	2.92e-07	3.18e-06
CNAG_00313	159.491	1.41252	0.275424	5.12854	2.92e-07	3.18e-06
CNAG_02225	43.7291	1.96504	0.383213	5.12781	2.93e-07	3.19e-06
CNAG_04187	697.285	1.03931	0.202723	5.12673	2.95e-07	3.2e-06
CNAG_04790	1088.35	-0.898581	0.175316	-5.1255	2.97e-07	3.22e-06
CNAG_06175	2392.17	1.02953	0.200896	5.12471	2.98e-07	3.23e-06
CNAG_04132	2016.29	-0.82866	0.161729	-5.12375	3e-07	3.24e-06
CNAG_13051	43.9388	2.47915	0.484026	5.12194	3.02e-07	3.26e-06
CNAG_00104	5522.38	-0.853726	0.166772	-5.11912	3.07e-07	3.31e-06
CNAG_03974	1763.11	1.58024	0.308779	5.11769	3.09e-07	3.33e-06
CNAG_06288	2514.96	-0.814225	0.159258	-5.11261	3.18e-07	3.42e-06
CNAG_00055	1095.39	-0.931664	0.182441	-5.10666	3.28e-07	3.52e-06
CNAG_04867	1006.58	1.08729	0.212941	5.10604	3.29e-07	3.52e-06
CNAG_00471	1991.5	-1.11262	0.217908	-5.10589	3.29e-07	3.52e-06
CNAG_04072	2881.09	-0.778163	0.152573	-5.10028	3.39e-07	3.63e-06
CNAG_04155	3655.69	-1.13406	0.222494	-5.09705	3.45e-07	3.68e-06
CNAG_03124	2423.87	-0.87886	0.17267	-5.08983	3.58e-07	3.82e-06
CNAG_01473	125.093	1.26757	0.249193	5.0867	3.64e-07	3.88e-06
CNAG_03264	1207.86	-0.890398	0.175306	-5.07912	3.79e-07	4.03e-06
CNAG_06125	250979	-1.05239	0.207233	-5.07829	3.81e-07	4.04e-06
CNAG_05755	2688.35	-1.03651	0.204175	-5.07659	3.84e-07	4.07e-06
CNAG_01665	780.602	-0.881638	0.173771	-5.07355	3.9e-07	4.13e-06
CNAG_03715	744.183	-1.15832	0.228307	-5.0735	3.91e-07	4.13e-06
CNAG_04411	402.011	0.889505	0.175331	5.0733	3.91e-07	4.13e-06
CNAG_00445	1089.9	-1.00207	0.197562	-5.07221	3.93e-07	4.14e-06
CNAG_00038	765.8	1.04155	0.205395	5.07097	3.96e-07	4.17e-06
CNAG_06018	200.996	1.12517	0.22195	5.0695	3.99e-07	4.19e-06
CNAG_01191	334.022	1.0016	0.197661	5.06728	4.04e-07	4.24e-06
CNAG_01019	20286.1	-1.32548	0.261668	-5.06549	4.07e-07	4.27e-06
CNAG_04402	2748.75	-0.810668	0.160055	-5.06494	4.09e-07	4.28e-06
CNAG_05352	1367.74	0.788985	0.15579	5.06443	4.1e-07	4.28e-06
CNAG_01593	2832.58	-0.993502	0.196235	-5.06283	4.13e-07	4.31e-06
CNAG_05926	3132.1	-0.799681	0.15806	-5.05934	4.21e-07	4.38e-06
CNAG_05181	524.931	0.899124	0.17772	5.0592	4.21e-07	4.38e-06
CNAG_02412	1240.21	-0.875264	0.173053	-5.05777	4.24e-07	4.41e-06
CNAG_02524	136.774	1.35378	0.26769	5.05725	4.25e-07	4.41e-06
CNAG_03412	722.854	1.14338	0.226233	5.054	4.33e-07	4.48e-06
CNAG_01381	1150.21	-1.05918	0.209591	-5.05358	4.34e-07	4.49e-06
CNAG_00237	4585.57	-1.13312	0.224259	-5.05272	4.36e-07	4.5e-06
CNAG_05031	494.522	-1.22063	0.242133	-5.04114	4.63e-07	4.78e-06
CNAG_01820	16626.8	-0.799066	0.15852	-5.04079	4.64e-07	4.78e-06
CNAG_05778	352.355	1.1137	0.220944	5.04065	4.64e-07	4.78e-06
CNAG_02366	834.251	-0.911256	0.180793	-5.04034	4.65e-07	4.78e-06
CNAG_06574	158.143	1.43961	0.285688	5.03909	4.68e-07	4.8e-06
CNAG_06426	1468.11	-1.10486	0.219345	-5.03711	4.73e-07	4.85e-06
CNAG_02197	2425.45	-0.963327	0.191413	-5.03271	4.84e-07	4.95e-06
CNAG_06755	5603.88	-0.82451	0.163848	-5.03215	4.85e-07	4.96e-06
CNAG_07507	231.16	1.27755	0.253973	5.03025	4.9e-07	5e-06
CNAG_00329	4290.52	-0.984932	0.195944	-5.02659	4.99e-07	5.09e-06
CNAG_12372	93.6799	-1.49475	0.297682	-5.0213	5.13e-07	5.22e-06
CNAG_01709	4723	-0.880862	0.175428	-5.02123	5.13e-07	5.22e-06
CNAG_03385	1410.89	1.25491	0.249924	5.02118	5.14e-07	5.22e-06
CNAG_02140	5021.71	-1.09529	0.218151	-5.02079	5.15e-07	5.22e-06
CNAG_03553	2486.8	-0.80462	0.160302	-5.01941	5.18e-07	5.25e-06
CNAG_00045	322.339	1.56548	0.312064	5.01653	5.26e-07	5.32e-06
CNAG_04558	67.1525	1.69145	0.337187	5.01635	5.27e-07	5.32e-06
CNAG_00849	207.846	1.22719	0.244936	5.01026	5.44e-07	5.48e-06
CNAG_02485	20174	-0.923316	0.184634	-5.0008	5.71e-07	5.75e-06
CNAG_01321	12055	-0.921827	0.184349	-5.00045	5.72e-07	5.75e-06
CNAG_12282	24.2849	3.71237	0.743875	4.99058	6.02e-07	6.05e-06
CNAG_06035	299.825	1.07028	0.214499	4.98968	6.05e-07	6.07e-06
CNAG_06539	38.6619	2.13241	0.427398	4.98929	6.06e-07	6.07e-06
CNAG_05241	1400.69	-0.931285	0.186708	-4.98792	6.1e-07	6.11e-06
CNAG_06032	645.567	-0.992991	0.199129	-4.98666	6.14e-07	6.14e-06
CNAG_01959	823.918	-1.17898	0.236493	-4.98527	6.19e-07	6.18e-06
CNAG_00054	82.7494	1.92723	0.386886	4.98138	6.31e-07	6.29e-06
CNAG_06723	6593.59	-1.02901	0.206655	-4.97935	6.38e-07	6.35e-06
CNAG_06831	253.313	1.07035	0.214965	4.9792	6.38e-07	6.35e-06
CNAG_05041	6825.57	-0.751496	0.151136	-4.97231	6.62e-07	6.57e-06
CNAG_06742	2355.92	-0.883757	0.177845	-4.96925	6.72e-07	6.66e-06
CNAG_05050	2008.83	-0.863615	0.174166	-4.95858	7.1e-07	7.03e-06
CNAG_01103	2125.94	-0.967042	0.195296	-4.95167	7.36e-07	7.28e-06
CNAG_07817	734.431	-0.971512	0.19628	-4.94961	7.44e-07	7.34e-06
CNAG_12550	218.389	1.23822	0.25043	4.94439	7.64e-07	7.53e-06
CNAG_04494	2018.61	-0.899122	0.181922	-4.94235	7.72e-07	7.6e-06
CNAG_02889	70.5456	-1.41392	0.286111	-4.94186	7.74e-07	7.61e-06
CNAG_03512	1800.49	-0.768604	0.155571	-4.94053	7.79e-07	7.66e-06
CNAG_06123	5506.41	-0.809561	0.163952	-4.93778	7.9e-07	7.75e-06
CNAG_02128	5727.11	-0.946118	0.191657	-4.93651	7.95e-07	7.79e-06
CNAG_06392	1081.96	-0.897646	0.181849	-4.93621	7.97e-07	7.8e-06
CNAG_00404	224.903	1.33048	0.269764	4.93202	8.14e-07	7.95e-06
CNAG_06112	7361.4	-0.852031	0.172882	-4.92841	8.29e-07	8.09e-06
CNAG_00608	1463.78	-0.756501	0.15365	-4.92353	8.5e-07	8.29e-06
CNAG_00345	3038.53	-0.81419	0.165394	-4.92274	8.53e-07	8.31e-06
CNAG_03310	937.739	-0.972258	0.197581	-4.92082	8.62e-07	8.38e-06
CNAG_13192	47.6737	1.90153	0.386658	4.91786	8.75e-07	8.5e-06
CNAG_02797	913.748	1.06956	0.217621	4.91481	8.89e-07	8.62e-06
CNAG_01947	250.975	1.01314	0.206335	4.91017	9.1e-07	8.81e-06
CNAG_07309	709.236	-0.955447	0.194762	-4.90573	9.31e-07	9e-06
CNAG_00886	6732.93	-1.06067	0.216359	-4.90236	9.47e-07	9.15e-06
CNAG_01686	1465.11	1.27858	0.260888	4.9009	9.54e-07	9.21e-06
CNAG_06963	1082.87	-0.926518	0.18912	-4.89909	9.63e-07	9.28e-06
CNAG_01949	457.657	-0.991525	0.202439	-4.89789	9.69e-07	9.31e-06
CNAG_02751	959.397	1.60253	0.327189	4.89787	9.69e-07	9.31e-06
CNAG_02990	6560.91	1.32509	0.27094	4.8907	1e-06	9.65e-06
CNAG_04620	1181.3	-0.922752	0.188717	-4.88961	1.01e-06	9.69e-06
CNAG_04416	67.9118	1.69004	0.345817	4.88709	1.02e-06	9.8e-06
CNAG_04741	1455.01	0.766174	0.157183	4.8744	1.09e-06	1.04e-05
CNAG_01222	3533.15	-0.861556	0.176807	-4.87286	1.1e-06	1.05e-05
CNAG_03154	736.483	0.962582	0.197627	4.8707	1.11e-06	1.06e-05
CNAG_12414	169.17	-1.14307	0.234758	-4.86915	1.12e-06	1.07e-05
CNAG_04340	2356.19	-0.857002	0.17602	-4.86878	1.12e-06	1.07e-05
CNAG_01287	12405.4	-0.830639	0.170622	-4.86829	1.13e-06	1.07e-05
CNAG_02102	23.5729	2.84565	0.585481	4.86037	1.17e-06	1.11e-05
CNAG_01400	8350.17	-0.711798	0.146501	-4.85864	1.18e-06	1.12e-05
CNAG_07333	1558.98	0.824662	0.169737	4.85848	1.18e-06	1.12e-05
CNAG_05425	8554.34	-0.837273	0.172352	-4.85791	1.19e-06	1.12e-05
CNAG_01140	2502.19	-1.08315	0.222975	-4.85774	1.19e-06	1.12e-05
CNAG_06876	374.277	-1.03701	0.213516	-4.85685	1.19e-06	1.13e-05
CNAG_07883	493.912	0.876006	0.180471	4.85399	1.21e-06	1.14e-05
CNAG_04944	573.072	1.03205	0.212823	4.84934	1.24e-06	1.17e-05
CNAG_06656	1484.41	-0.822225	0.169592	-4.84826	1.25e-06	1.17e-05
CNAG_06865	1171.17	-0.884511	0.182481	-4.84715	1.25e-06	1.18e-05
CNAG_03584	2653.48	-0.800142	0.165093	-4.8466	1.26e-06	1.18e-05
CNAG_00743	3934.32	-0.808268	0.166896	-4.84295	1.28e-06	1.2e-05
CNAG_03766	1530.78	-0.848332	0.175221	-4.84149	1.29e-06	1.2e-05
CNAG_01060	8924.57	-0.855923	0.176968	-4.83661	1.32e-06	1.23e-05
CNAG_02033	2873.05	-1.0336	0.213723	-4.83616	1.32e-06	1.23e-05
CNAG_03748	2528.98	-0.771135	0.159469	-4.83564	1.33e-06	1.24e-05
CNAG_02939	926.753	-0.820729	0.169805	-4.83337	1.34e-06	1.25e-05
CNAG_00485	278.103	1.52494	0.315793	4.82891	1.37e-06	1.28e-05
CNAG_01544	3446.96	-0.819079	0.169635	-4.82849	1.38e-06	1.28e-05
CNAG_06027	190.082	3.83155	0.793652	4.82775	1.38e-06	1.28e-05
CNAG_07347	1971.66	1.4069	0.291436	4.82746	1.38e-06	1.28e-05
CNAG_03238	212.202	1.02244	0.211834	4.82662	1.39e-06	1.28e-05
CNAG_02405	176.46	1.13368	0.235	4.82417	1.41e-06	1.3e-05
CNAG_00597	704.652	-1.54119	0.319615	-4.82201	1.42e-06	1.31e-05
CNAG_01870	3197.3	-0.770206	0.159739	-4.82167	1.42e-06	1.31e-05
CNAG_03284	989.409	-0.936271	0.194401	-4.81618	1.46e-06	1.35e-05
CNAG_05229	287.136	-1.0095	0.209652	-4.8151	1.47e-06	1.35e-05
CNAG_01526	2393.75	0.932005	0.193634	4.81324	1.49e-06	1.36e-05
CNAG_00236	625.696	-0.897043	0.186541	-4.80883	1.52e-06	1.39e-05
CNAG_04891	98.2453	1.77786	0.369936	4.80586	1.54e-06	1.41e-05
CNAG_06446	3460.7	-0.734246	0.152873	-4.80297	1.56e-06	1.43e-05
CNAG_01081	197.919	1.35514	0.282229	4.80155	1.57e-06	1.44e-05
CNAG_03184	1118.65	-1.11632	0.23255	-4.80034	1.58e-06	1.45e-05
CNAG_05412	73.9984	1.48086	0.308693	4.79719	1.61e-06	1.47e-05
CNAG_05853	546.861	-1.07872	0.224917	-4.79609	1.62e-06	1.47e-05
CNAG_01145	1233.28	-0.96637	0.201601	-4.79348	1.64e-06	1.49e-05
CNAG_03081	2077.02	-0.963261	0.201062	-4.79086	1.66e-06	1.51e-05
CNAG_06294	716.752	-0.829272	0.173104	-4.7906	1.66e-06	1.51e-05
CNAG_04361	1422.14	-0.757144	0.158082	-4.78956	1.67e-06	1.51e-05
CNAG_04776	5980.15	-0.796303	0.166313	-4.78798	1.68e-06	1.52e-05
CNAG_06341	2365.86	-1.02726	0.214771	-4.78304	1.73e-06	1.56e-05
CNAG_00896	93.1695	1.69434	0.354478	4.77983	1.75e-06	1.58e-05
CNAG_02041	427.987	-0.919877	0.192498	-4.77863	1.76e-06	1.59e-05
CNAG_06061	5276.83	-0.71351	0.149431	-4.77483	1.8e-06	1.62e-05
CNAG_12776	160.615	1.05224	0.220385	4.77457	1.8e-06	1.62e-05
CNAG_01877	5597.07	-0.913745	0.191482	-4.77197	1.82e-06	1.64e-05
CNAG_02720	391.013	-1.28692	0.269711	-4.77145	1.83e-06	1.64e-05
CNAG_03373	1614.44	-1.01886	0.21358	-4.77041	1.84e-06	1.65e-05
CNAG_04000	1217.54	-0.778726	0.163269	-4.76959	1.85e-06	1.65e-05
CNAG_04047	322.101	0.992738	0.208144	4.76947	1.85e-06	1.65e-05
CNAG_04989	743.233	-0.828685	0.173791	-4.76828	1.86e-06	1.66e-05
CNAG_01215	1098.86	-1.00705	0.211226	-4.76766	1.86e-06	1.66e-05
CNAG_13196	430.029	-1.04591	0.219492	-4.76516	1.89e-06	1.68e-05
CNAG_06774	1494.59	-0.783181	0.164366	-4.76486	1.89e-06	1.68e-05
CNAG_05194	1543.22	-0.745451	0.156863	-4.75226	2.01e-06	1.79e-05
CNAG_01123	1248.5	-0.769456	0.161994	-4.74991	2.04e-06	1.81e-05
CNAG_02890	2645.48	-0.77142	0.162441	-4.74892	2.05e-06	1.81e-05
CNAG_07358	154.647	1.26526	0.266613	4.74567	2.08e-06	1.84e-05
CNAG_06483	410.94	1.19698	0.252346	4.74341	2.1e-06	1.86e-05
CNAG_07534	330.249	1.00468	0.211885	4.74162	2.12e-06	1.87e-05
CNAG_02864	705.297	-1.07052	0.225831	-4.74038	2.13e-06	1.88e-05
CNAG_07901	829.232	0.750395	0.158369	4.73827	2.16e-06	1.9e-05
CNAG_02136	2502.06	-0.88006	0.186057	-4.73007	2.24e-06	1.98e-05
CNAG_12913	211.484	1.13648	0.240284	4.72973	2.25e-06	1.98e-05
CNAG_05287	744.897	-0.956554	0.202285	-4.72874	2.26e-06	1.98e-05
CNAG_07660	12181.2	-0.859237	0.181922	-4.72309	2.32e-06	2.04e-05
CNAG_01466	533.216	0.862776	0.182789	4.72007	2.36e-06	2.07e-05
CNAG_06118	574.499	-0.958047	0.203171	-4.71547	2.41e-06	2.11e-05
CNAG_00804	784.634	-0.73674	0.15631	-4.71333	2.44e-06	2.13e-05
CNAG_03926	2759.24	-0.782095	0.165943	-4.71302	2.44e-06	2.13e-05
CNAG_05350	680.318	-0.778787	0.165329	-4.71053	2.47e-06	2.16e-05
CNAG_01537	7416.52	-0.821689	0.174487	-4.70918	2.49e-06	2.17e-05
CNAG_03387	301.694	-1.00218	0.212878	-4.70778	2.5e-06	2.18e-05
CNAG_01936	80.9015	1.54804	0.328951	4.70598	2.53e-06	2.2e-05
CNAG_01539	6125.29	-1.17256	0.249285	-4.7037	2.55e-06	2.22e-05
CNAG_02284	225.601	1.23196	0.261955	4.70295	2.56e-06	2.22e-05
CNAG_03918	685.552	0.874796	0.186042	4.70215	2.57e-06	2.23e-05
CNAG_01671	79.481	1.49138	0.317279	4.70053	2.59e-06	2.25e-05
CNAG_03323	3105.87	-0.802878	0.170838	-4.69965	2.61e-06	2.25e-05
CNAG_12452	65.5398	-1.4489	0.308682	-4.69382	2.68e-06	2.32e-05
CNAG_06716	2961.68	-0.929591	0.198123	-4.692	2.71e-06	2.33e-05
CNAG_02152	333.206	1.237	0.263652	4.69178	2.71e-06	2.33e-05
CNAG_00867	19.6152	3.01517	0.642772	4.69089	2.72e-06	2.34e-05
CNAG_12238	159.256	1.11798	0.238335	4.69081	2.72e-06	2.34e-05
CNAG_07330	54.7979	1.77346	0.378559	4.68476	2.8e-06	2.41e-05
CNAG_06727	150.734	1.10872	0.23678	4.68251	2.83e-06	2.43e-05
CNAG_04388	5822.01	1.0626	0.226948	4.68215	2.84e-06	2.43e-05
CNAG_06191	761.404	0.83191	0.177778	4.67949	2.88e-06	2.46e-05
CNAG_00270	1104.8	-1.08975	0.232926	-4.67853	2.89e-06	2.47e-05
CNAG_02447	581.644	-0.943103	0.2016	-4.67809	2.9e-06	2.47e-05
CNAG_07884	8140.41	-0.920693	0.196848	-4.67719	2.91e-06	2.48e-05
CNAG_07805	2343.78	0.79702	0.170444	4.67614	2.92e-06	2.49e-05
CNAG_07316	271.726	-0.980462	0.209959	-4.66979	3.02e-06	2.57e-05
CNAG_00637	224.802	1.22456	0.262371	4.66727	3.05e-06	2.59e-05
CNAG_03148	1100	-0.937705	0.200926	-4.66692	3.06e-06	2.6e-05
CNAG_05764	3407.46	-0.747331	0.160225	-4.66425	3.1e-06	2.63e-05
CNAG_06870	108.516	1.17436	0.251787	4.66411	3.1e-06	2.63e-05
CNAG_03687	198.87	1.22037	0.261713	4.66301	3.12e-06	2.64e-05
CNAG_04027	180.835	1.11195	0.23851	4.66208	3.13e-06	2.65e-05
CNAG_04522	970.851	-0.735731	0.15783	-4.66153	3.14e-06	2.65e-05
CNAG_06411	90.6735	1.28316	0.275267	4.66151	3.14e-06	2.65e-05
CNAG_04407	279.186	1.05591	0.226541	4.66103	3.15e-06	2.65e-05
CNAG_07458	266.56	0.968588	0.20784	4.66026	3.16e-06	2.66e-05
CNAG_13063	635.765	0.805676	0.172897	4.65985	3.16e-06	2.66e-05
CNAG_06285	199.322	1.17842	0.253095	4.65603	3.22e-06	2.71e-05
CNAG_01095	608.752	0.877187	0.188487	4.65384	3.26e-06	2.73e-05
CNAG_07988	519.399	0.945856	0.203332	4.65179	3.29e-06	2.76e-05
CNAG_01634	2203.13	-0.799847	0.17195	-4.65163	3.29e-06	2.76e-05
CNAG_02709	2066.09	-0.872762	0.187677	-4.65035	3.31e-06	2.77e-05
CNAG_02459	156.422	1.36544	0.293853	4.64667	3.37e-06	2.82e-05
CNAG_05163	46.2797	1.93876	0.417745	4.64101	3.47e-06	2.89e-05
CNAG_05239	838.256	-0.898684	0.193698	-4.63961	3.49e-06	2.91e-05
CNAG_05410	226.576	1.08454	0.233791	4.63891	3.5e-06	2.91e-05
CNAG_05270	1369.44	-0.896382	0.19335	-4.63606	3.55e-06	2.95e-05
CNAG_04657	752.408	1.15166	0.248711	4.63049	3.65e-06	3.03e-05
CNAG_02357	664.626	0.819667	0.177027	4.63018	3.65e-06	3.03e-05
CNAG_05545	392.305	0.830117	0.179306	4.62961	3.66e-06	3.03e-05
CNAG_04541	2378.09	-0.751848	0.162433	-4.62867	3.68e-06	3.05e-05
CNAG_03890	1515.41	-0.820233	0.177353	-4.62485	3.75e-06	3.1e-05
CNAG_00654	359.374	-1.21391	0.26266	-4.62162	3.81e-06	3.14e-05
CNAG_03004	1360.13	-0.839064	0.181568	-4.62121	3.82e-06	3.15e-05
CNAG_03205	1985.9	-0.917482	0.198565	-4.62056	3.83e-06	3.15e-05
CNAG_06756	1496.8	-0.917286	0.198536	-4.62024	3.83e-06	3.15e-05
CNAG_04571	1582.69	-0.844748	0.182852	-4.61984	3.84e-06	3.16e-05
CNAG_06891	1144.34	-0.901537	0.19543	-4.6131	3.97e-06	3.26e-05
CNAG_01881	4870.78	-0.819684	0.17769	-4.61301	3.97e-06	3.26e-05
CNAG_03709	310.427	1.10951	0.240572	4.61195	3.99e-06	3.27e-05
CNAG_06578	11506.2	1.21267	0.263079	4.60955	4.04e-06	3.3e-05
CNAG_06076	2937.7	-0.701788	0.152331	-4.60699	4.09e-06	3.34e-05
CNAG_00782	450.134	0.887519	0.19273	4.60499	4.12e-06	3.37e-05
CNAG_05161	221.485	0.985097	0.213963	4.60405	4.14e-06	3.38e-05
CNAG_03507	19134.1	-0.691784	0.150355	-4.601	4.2e-06	3.43e-05
CNAG_04375	2633.53	-0.809189	0.176017	-4.59723	4.28e-06	3.49e-05
CNAG_00680	1104.87	-0.973642	0.211848	-4.59595	4.31e-06	3.5e-05
CNAG_01320	3643.87	-0.762621	0.1662	-4.58858	4.46e-06	3.62e-05
CNAG_04029	67.0771	1.51763	0.330787	4.58793	4.48e-06	3.63e-05
CNAG_03720	631.498	-0.867777	0.189191	-4.58679	4.5e-06	3.65e-05
CNAG_00710	500.217	-0.884445	0.1929	-4.585	4.54e-06	3.68e-05
CNAG_07720	3910.72	-0.83837	0.182915	-4.58338	4.58e-06	3.7e-05
CNAG_04050	4754.88	-0.783999	0.171178	-4.58002	4.65e-06	3.76e-05
CNAG_02953	604.235	-0.845053	0.184545	-4.57911	4.67e-06	3.77e-05
CNAG_02545	14689.2	-0.756275	0.165238	-4.57688	4.72e-06	3.81e-05
CNAG_03301	4067.57	-0.90457	0.1977	-4.57547	4.75e-06	3.83e-05
CNAG_02194	780.666	-0.948885	0.207454	-4.57394	4.79e-06	3.85e-05
CNAG_07957	1936.47	-0.922045	0.201593	-4.57379	4.79e-06	3.85e-05
CNAG_05187	1203.53	0.704565	0.154098	4.5722	4.83e-06	3.87e-05
CNAG_06587	440.169	1.02022	0.223163	4.57166	4.84e-06	3.88e-05
CNAG_06621	4553.72	-0.77195	0.168878	-4.57105	4.85e-06	3.89e-05
CNAG_01005	7258.59	-1.03047	0.225642	-4.56682	4.95e-06	3.96e-05
CNAG_06710	2434.71	-1.01893	0.223164	-4.56584	4.98e-06	3.98e-05
CNAG_05359	780.041	-0.742167	0.162553	-4.56569	4.98e-06	3.98e-05
CNAG_00100	9892.45	1.00821	0.220969	4.5627	5.05e-06	4.03e-05
CNAG_01356	713.2	0.758099	0.166214	4.56099	5.09e-06	4.06e-05
CNAG_06377	30566.3	-0.881422	0.193258	-4.56087	5.09e-06	4.06e-05
CNAG_07368	222.305	1.15209	0.25263	4.56039	5.11e-06	4.06e-05
CNAG_05655	954.38	-0.792668	0.17389	-4.55846	5.15e-06	4.09e-05
CNAG_01173	829.935	0.843299	0.184998	4.55842	5.15e-06	4.09e-05
CNAG_00390	370.056	1.07699	0.236389	4.55601	5.21e-06	4.13e-05
CNAG_03110	736.638	0.784471	0.172263	4.55392	5.27e-06	4.17e-05
CNAG_07321	245.242	1.01817	0.22369	4.5517	5.32e-06	4.21e-05
CNAG_12695	107.858	-1.26556	0.278063	-4.55135	5.33e-06	4.21e-05
CNAG_02896	1984.01	-0.867656	0.190914	-4.54474	5.5e-06	4.34e-05
CNAG_01822	1685.74	-0.86956	0.19149	-4.54102	5.6e-06	4.41e-05
CNAG_05647	1073.63	-0.842767	0.185609	-4.54054	5.61e-06	4.42e-05
CNAG_07177	8537.01	-0.876575	0.193097	-4.53956	5.64e-06	4.44e-05
CNAG_04180	2666.5	-0.765398	0.16863	-4.53892	5.65e-06	4.44e-05
CNAG_00510	1481.68	-0.90673	0.199778	-4.5387	5.66e-06	4.44e-05
CNAG_02791	690.51	-0.759335	0.167329	-4.53796	5.68e-06	4.46e-05
CNAG_03080	5658.51	-0.717844	0.158381	-4.5324	5.83e-06	4.57e-05
CNAG_00806	11802.6	-1.10826	0.244768	-4.5278	5.96e-06	4.67e-05
CNAG_00870	133.079	1.09594	0.24208	4.52716	5.98e-06	4.67e-05
CNAG_00015	202.988	1.12256	0.248047	4.52559	6.02e-06	4.7e-05
CNAG_05196	733.729	-0.833593	0.184254	-4.52415	6.06e-06	4.73e-05
CNAG_06367	2531.12	-1.15815	0.256015	-4.52375	6.08e-06	4.74e-05
CNAG_07492	121.373	1.76905	0.391191	4.52222	6.12e-06	4.77e-05
CNAG_02988	879.928	-1.03442	0.228813	-4.52083	6.16e-06	4.79e-05
CNAG_03999	366.111	1.18593	0.262417	4.51928	6.21e-06	4.82e-05
CNAG_00575	390.908	1.5173	0.335756	4.51906	6.21e-06	4.82e-05
CNAG_00983	337.977	1.1269	0.249384	4.51873	6.22e-06	4.82e-05
CNAG_03765	3555.38	0.860631	0.190511	4.51749	6.26e-06	4.85e-05
CNAG_01682	5413.07	-0.74567	0.165072	-4.51723	6.27e-06	4.85e-05
CNAG_07710	21.0751	2.69525	0.596967	4.51491	6.33e-06	4.9e-05
CNAG_01379	849.213	-1.03171	0.228524	-4.51468	6.34e-06	4.9e-05
CNAG_01578	787.188	-0.78751	0.174448	-4.51428	6.35e-06	4.9e-05
CNAG_02006	703.634	-0.947706	0.210006	-4.51276	6.4e-06	4.93e-05
CNAG_03162	499.544	1.02864	0.227982	4.51191	6.42e-06	4.95e-05
CNAG_02601	77.9082	1.32924	0.294619	4.51173	6.43e-06	4.95e-05
CNAG_03607	468.743	0.918799	0.203838	4.5075	6.56e-06	5.04e-05
CNAG_02073	540.357	0.984061	0.218439	4.50497	6.64e-06	5.1e-05
CNAG_00848	1937.69	1.2768	0.283452	4.50447	6.65e-06	5.1e-05
CNAG_00682	1073.21	0.844347	0.18749	4.50342	6.69e-06	5.12e-05
CNAG_06339	287.71	0.993327	0.220701	4.50078	6.77e-06	5.18e-05
CNAG_03986	3402.46	-0.749135	0.166449	-4.50069	6.77e-06	5.18e-05
CNAG_04290	4715.5	-0.885225	0.196716	-4.50002	6.79e-06	5.19e-05
CNAG_05113	788.871	1.02192	0.2271	4.49986	6.8e-06	5.19e-05
CNAG_07374	1665.51	-0.823854	0.183094	-4.49963	6.81e-06	5.19e-05
CNAG_02589	417.848	0.996823	0.221658	4.49712	6.89e-06	5.24e-05
CNAG_02074	2148.02	-0.855244	0.190483	-4.48987	7.13e-06	5.42e-05
CNAG_05789	1317.55	-0.864982	0.192736	-4.48791	7.19e-06	5.47e-05
CNAG_06248	4139.76	-0.76182	0.169795	-4.48671	7.23e-06	5.49e-05
CNAG_06684	1891.75	-0.677777	0.151426	-4.47597	7.61e-06	5.77e-05
CNAG_05220	63.7225	1.37562	0.307478	4.4739	7.68e-06	5.82e-05
CNAG_05773	446.502	0.855688	0.191441	4.46972	7.83e-06	5.93e-05
CNAG_00264	903.511	0.86367	0.193318	4.46761	7.91e-06	5.98e-05
CNAG_05202	2205.57	-0.805063	0.180319	-4.46466	8.02e-06	6.06e-05
CNAG_05383	242.603	1.29842	0.291063	4.46096	8.16e-06	6.16e-05
CNAG_02540	478.139	-0.796607	0.178657	-4.45887	8.24e-06	6.21e-05
CNAG_07337	366.77	0.7885	0.17686	4.45834	8.26e-06	6.22e-05
CNAG_02925	5655.34	0.693044	0.15577	4.44914	8.62e-06	6.49e-05
CNAG_05624	1042.34	-0.729657	0.164043	-4.44797	8.67e-06	6.52e-05
CNAG_05843	597.42	0.841029	0.189151	4.44634	8.73e-06	6.56e-05
CNAG_06785	86.255	1.45258	0.326837	4.44435	8.82e-06	6.61e-05
CNAG_02435	1671.4	-0.716244	0.161249	-4.44184	8.92e-06	6.68e-05
CNAG_06849	4723.37	-0.802819	0.180744	-4.44175	8.92e-06	6.68e-05
CNAG_00184	1818.69	-0.837881	0.188729	-4.4396	9.01e-06	6.74e-05
CNAG_04902	507.677	1.02349	0.230577	4.43882	9.05e-06	6.76e-05
CNAG_12203	123.287	-1.18655	0.267381	-4.43766	9.09e-06	6.79e-05
CNAG_04590	128.153	-1.0599	0.239031	-4.43416	9.24e-06	6.89e-05
CNAG_06456	4132.04	-0.783309	0.176703	-4.43292	9.3e-06	6.93e-05
CNAG_03543	945.477	0.70288	0.158574	4.43249	9.32e-06	6.93e-05
CNAG_06520	454.735	-0.779326	0.176018	-4.42754	9.53e-06	7.09e-05
CNAG_07488	2819.79	-0.75545	0.170664	-4.42654	9.58e-06	7.11e-05
CNAG_03968	3105.65	-0.807612	0.182505	-4.42515	9.64e-06	7.15e-05
CNAG_03260	3041.19	-0.69327	0.15668	-4.42476	9.66e-06	7.16e-05
CNAG_07668	652.346	0.754933	0.170728	4.42183	9.79e-06	7.25e-05
CNAG_04333	147.153	1.25644	0.284274	4.41982	9.88e-06	7.31e-05
CNAG_03603	2543.28	-0.750742	0.170196	-4.41105	1.03e-05	7.6e-05
CNAG_03161	375.803	0.88261	0.20021	4.40842	1.04e-05	7.69e-05
CNAG_02995	3140.44	-0.839845	0.190638	-4.40545	1.06e-05	7.79e-05
CNAG_03409	291.242	1.23594	0.280587	4.40482	1.06e-05	7.8e-05
CNAG_02308	145.872	1.05278	0.239188	4.40147	1.08e-05	7.92e-05
CNAG_02526	43.3125	2.47389	0.563073	4.39356	1.12e-05	8.2e-05
CNAG_00253	233.758	1.05092	0.239245	4.39265	1.12e-05	8.23e-05
CNAG_03984	647.096	-0.842674	0.192165	-4.38516	1.16e-05	8.51e-05
CNAG_02354	4859.9	-0.752614	0.17171	-4.38305	1.17e-05	8.58e-05
CNAG_00334	43246	-1.00457	0.229395	-4.37923	1.19e-05	8.73e-05
CNAG_04348	2412.65	-0.730768	0.166909	-4.37824	1.2e-05	8.76e-05
CNAG_05130	620.565	-1.08411	0.247637	-4.37782	1.2e-05	8.77e-05
CNAG_08027	507.621	0.784453	0.179219	4.37707	1.2e-05	8.79e-05
CNAG_12714	217.939	-1.21082	0.276772	-4.37478	1.22e-05	8.87e-05
CNAG_02879	2131.15	-0.868987	0.199065	-4.36535	1.27e-05	9.25e-05
CNAG_07864	2388.42	-0.742168	0.17003	-4.36492	1.27e-05	9.26e-05
CNAG_01906	680.994	-0.801034	0.183543	-4.36429	1.28e-05	9.28e-05
CNAG_05932	8076.57	1.02788	0.235607	4.36268	1.28e-05	9.34e-05
CNAG_03863	4505.54	-0.679117	0.15596	-4.35443	1.33e-05	9.68e-05
CNAG_00932	1332.4	3.98973	0.916258	4.35437	1.33e-05	9.68e-05
CNAG_08020	113.969	1.33756	0.307278	4.35293	1.34e-05	9.74e-05
CNAG_06009	116.434	1.35375	0.311109	4.35137	1.35e-05	9.8e-05
CNAG_00968	111.935	1.2419	0.285574	4.3488	1.37e-05	9.9e-05
CNAG_06927	1957.32	-0.900635	0.207195	-4.3468	1.38e-05	9.98e-05
CNAG_01960	136.789	1.12404	0.258647	4.34583	1.39e-05	0.00010019
CNAG_03383	561.098	-0.738029	0.16994	-4.34287	1.41e-05	0.000101453
CNAG_05876	501.855	-0.791926	0.182381	-4.34214	1.41e-05	0.000101694
CNAG_05247	1961.45	-0.754171	0.173714	-4.34145	1.42e-05	0.000101845
CNAG_07756	847.01	-1.14095	0.262807	-4.3414	1.42e-05	0.000101845
CNAG_03113	735.449	1.39247	0.320843	4.34002	1.42e-05	0.000102386
CNAG_05470	372.176	0.845255	0.194979	4.3351	1.46e-05	0.000104606
CNAG_12351	35.3837	1.81237	0.418241	4.33333	1.47e-05	0.000105351
CNAG_02848	307.099	0.926672	0.213926	4.33174	1.48e-05	0.000106012
CNAG_01550	1033.09	-0.822992	0.190164	-4.3278	1.51e-05	0.000107824
CNAG_06432	801.551	1.16431	0.269131	4.32619	1.52e-05	0.000108514
CNAG_01175	1162.68	-0.805907	0.186337	-4.325	1.53e-05	0.000108997
CNAG_03481	562.945	-1.07732	0.249275	-4.32181	1.55e-05	0.000110482
CNAG_00449	1766.81	-0.80267	0.185768	-4.32083	1.55e-05	0.000110798
CNAG_00705	2323.94	-0.773901	0.179112	-4.32076	1.55e-05	0.000110798
CNAG_05086	800.398	-0.963298	0.222961	-4.32048	1.56e-05	0.000110835
CNAG_00653	104.126	1.30918	0.303068	4.31976	1.56e-05	0.00011109
CNAG_00535	2852.98	-0.707798	0.163946	-4.31726	1.58e-05	0.000112248
CNAG_06935	988.061	1.16583	0.270536	4.30934	1.64e-05	0.000116211
CNAG_00299	345.221	0.966695	0.224334	4.30918	1.64e-05	0.000116211
CNAG_02950	3038.71	-0.693444	0.160934	-4.30887	1.64e-05	0.000116265
CNAG_07423	438.877	-0.761289	0.176998	-4.30111	1.7e-05	0.000120302
CNAG_04283	1270.48	0.774735	0.180156	4.30035	1.71e-05	0.000120601
CNAG_03160	84.8831	1.36401	0.317244	4.29957	1.71e-05	0.000120915
CNAG_02534	717.52	-0.784587	0.182586	-4.29709	1.73e-05	0.00012216
CNAG_01736	502.587	-0.993962	0.231333	-4.29668	1.73e-05	0.000122272
CNAG_00527	3085.85	-0.764365	0.177999	-4.29422	1.75e-05	0.00012352
CNAG_02215	350.459	-0.847706	0.197477	-4.29269	1.77e-05	0.000124258
CNAG_06206	2688.3	-0.84718	0.197395	-4.2918	1.77e-05	0.000124639
CNAG_04948	2362.14	-0.722319	0.16832	-4.29134	1.78e-05	0.000124784
CNAG_00405	824.014	0.713206	0.166217	4.2908	1.78e-05	0.000124968
CNAG_04584	7510.98	-0.599659	0.139808	-4.28917	1.79e-05	0.000125776
CNAG_00165	3415.86	-0.63545	0.148221	-4.28718	1.81e-05	0.000126788
CNAG_04630	1298.8	0.913035	0.213372	4.27909	1.88e-05	0.000131364
CNAG_06180	7060.01	-0.710652	0.166088	-4.27878	1.88e-05	0.000131425
CNAG_00786	724.51	-0.723148	0.169162	-4.27488	1.91e-05	0.000133523
CNAG_05256	532.592	0.899314	0.210374	4.27484	1.91e-05	0.000133523
CNAG_04157	533.956	-0.811445	0.189829	-4.27461	1.91e-05	0.000133534
CNAG_03762	2737.86	-1.02138	0.239033	-4.27296	1.93e-05	0.000134401
CNAG_12536	108.7	1.16912	0.273787	4.2702	1.95e-05	0.00013595
CNAG_03664	1577.37	0.812396	0.190293	4.26918	1.96e-05	0.000136447
CNAG_03261	3799.72	-0.646777	0.151518	-4.26865	1.97e-05	0.000136575
CNAG_05675	163.126	1.04297	0.244338	4.26856	1.97e-05	0.000136575
CNAG_01588	3808.6	1.22346	0.286699	4.26741	1.98e-05	0.000137158
CNAG_01600	2276.8	-0.828547	0.194174	-4.26702	1.98e-05	0.000137269
CNAG_07732	574.557	0.702633	0.164724	4.26552	1.99e-05	0.000138069
CNAG_02556	89.6524	1.32205	0.310032	4.26422	2.01e-05	0.000138748
CNAG_00994	2040.15	-0.783733	0.183864	-4.26257	2.02e-05	0.000139651
CNAG_01866	339.448	1.01065	0.237248	4.25991	2.05e-05	0.000141194
CNAG_04351	202.898	1.20957	0.283979	4.25938	2.05e-05	0.000141395
CNAG_01370	64.7296	-1.37238	0.322287	-4.25827	2.06e-05	0.000141973
CNAG_06188	299.267	0.832181	0.195547	4.25565	2.08e-05	0.000143516
CNAG_07549	1095.29	-0.965272	0.226841	-4.25527	2.09e-05	0.000143624
CNAG_00874	2419.65	-0.812396	0.19095	-4.2545	2.1e-05	0.00014399
CNAG_02337	751.241	-0.771778	0.181426	-4.25395	2.1e-05	0.000144213
CNAG_00766	294.509	0.915664	0.215277	4.25341	2.11e-05	0.000144428
CNAG_06485	173.967	0.939045	0.220958	4.24987	2.14e-05	0.000146511
CNAG_03433	1616.79	-0.701721	0.165119	-4.2498	2.14e-05	0.000146511
CNAG_04553	27.6471	1.97895	0.465734	4.24909	2.15e-05	0.000146841
CNAG_02026	73.6485	1.2161	0.286379	4.24648	2.17e-05	0.000148426
CNAG_00016	2470.98	-0.716865	0.168906	-4.24416	2.19e-05	0.000149837
CNAG_02562	193.81	0.896465	0.211272	4.24318	2.2e-05	0.000150355
CNAG_04039	1609.5	-0.763765	0.180127	-4.24014	2.23e-05	0.000152268
CNAG_02768	179.252	1.49251	0.352154	4.23822	2.25e-05	0.000153437
CNAG_01214	214.498	0.900712	0.212602	4.23661	2.27e-05	0.000154388
CNAG_04681	26.374	2.59768	0.613178	4.23643	2.27e-05	0.000154388
CNAG_04181	1244.16	-0.841343	0.198621	-4.23592	2.28e-05	0.000154601
CNAG_06973	93.5234	1.25357	0.296234	4.23168	2.32e-05	0.000157399
CNAG_00669	1585.58	-0.910656	0.215214	-4.23139	2.32e-05	0.000157466
CNAG_04381	608.529	0.728812	0.172278	4.23043	2.33e-05	0.000157993
CNAG_05667	331.826	-1.0072	0.238218	-4.22804	2.36e-05	0.000159537
CNAG_02858	10311.7	-0.887161	0.209981	-4.22496	2.39e-05	0.000161593
CNAG_02507	4971.76	-0.645908	0.152892	-4.22459	2.39e-05	0.000161711
CNAG_01337	202.528	1.16498	0.275862	4.22304	2.41e-05	0.000162683
CNAG_07707	47.1453	1.72479	0.408634	4.22087	2.43e-05	0.000164114
CNAG_06400	25361.1	-0.944628	0.223873	-4.21947	2.45e-05	0.000164984
CNAG_06753	2352.7	-0.71131	0.168651	-4.21765	2.47e-05	0.000166174
CNAG_05554	2570.76	-0.778578	0.184659	-4.2163	2.48e-05	0.000167024
CNAG_06005	2677.33	-0.758852	0.180002	-4.21579	2.49e-05	0.00016725
CNAG_04090	1135.68	-0.910604	0.216009	-4.21559	2.49e-05	0.000167252
CNAG_03504	169.376	0.959473	0.227684	4.21406	2.51e-05	0.000168239
CNAG_07965	1714.61	0.834987	0.198177	4.21333	2.52e-05	0.000168636
CNAG_06336	1106.93	0.764104	0.181399	4.21229	2.53e-05	0.000169261
CNAG_05793	999.357	-0.80143	0.190347	-4.21035	2.55e-05	0.000170568
CNAG_07453	1912.57	-0.769143	0.182722	-4.20935	2.56e-05	0.000171173
CNAG_04680	850.974	-0.921519	0.219067	-4.20657	2.59e-05	0.000173143
CNAG_00692	96.2406	1.21087	0.287871	4.20631	2.6e-05	0.00017319
CNAG_13120	51.6405	1.89616	0.450842	4.20582	2.6e-05	0.00017341
CNAG_05582	103.569	1.18278	0.281306	4.20459	2.62e-05	0.000174203
CNAG_05664	2662.54	-0.710189	0.16892	-4.2043	2.62e-05	0.000174272
CNAG_04670	2893.52	-0.715428	0.1702	-4.20345	2.63e-05	0.000174684
CNAG_02236	428.155	1.12062	0.266601	4.20337	2.63e-05	0.000174684
CNAG_06311	620.819	0.746562	0.17766	4.20219	2.64e-05	0.000175443
CNAG_02806	1548.98	-0.701226	0.167038	-4.198	2.69e-05	0.000178558
CNAG_04395	1925.45	-0.813292	0.193753	-4.19757	2.7e-05	0.000178744
CNAG_07566	447.214	0.899353	0.21439	4.19494	2.73e-05	0.000180673
CNAG_04991	995.791	0.976395	0.23281	4.19395	2.74e-05	0.000181298
CNAG_03076	165.464	0.98454	0.234787	4.19333	2.75e-05	0.000181638
CNAG_04470	119.513	-1.0886	0.25969	-4.19192	2.77e-05	0.000182516
CNAG_00559	902.817	-0.708759	0.169081	-4.19184	2.77e-05	0.000182516
CNAG_02029	1180.43	-0.710003	0.169388	-4.19158	2.77e-05	0.000182566
CNAG_00781	1313.88	-0.896106	0.213888	-4.18961	2.79e-05	0.000183995
CNAG_00906	1528.48	-0.822954	0.19655	-4.18698	2.83e-05	0.000185975
CNAG_00706	1667.02	-0.758591	0.181254	-4.18522	2.85e-05	0.00018726
CNAG_00644	660.058	0.864697	0.20664	4.18455	2.86e-05	0.000187653
CNAG_03988	27.4205	1.94284	0.464434	4.18325	2.87e-05	0.000188564
CNAG_00090	682.624	-0.771185	0.184631	-4.17689	2.96e-05	0.000193743
CNAG_00895	1869.51	0.659423	0.157885	4.17659	2.96e-05	0.000193832
CNAG_05578	470.408	-1.08141	0.259006	-4.17522	2.98e-05	0.000194836
CNAG_01114	568.192	-0.79121	0.190011	-4.16402	3.13e-05	0.000204466
CNAG_01121	259.102	1.27598	0.306531	4.16266	3.15e-05	0.000205512
CNAG_05672	1796.62	-0.717631	0.172431	-4.16185	3.16e-05	0.000205977
CNAG_03728	140.294	-1.23716	0.29727	-4.16175	3.16e-05	0.000205977
CNAG_04370	2291.81	-0.822269	0.197679	-4.15961	3.19e-05	0.000207737
CNAG_07373	7805.94	-0.837302	0.20132	-4.15906	3.2e-05	0.000208055
CNAG_01171	990.718	-0.930091	0.223716	-4.15747	3.22e-05	0.000209334
CNAG_01437	1886.4	-0.686613	0.165185	-4.15662	3.23e-05	0.000209926
CNAG_05320	297.766	-0.853816	0.205457	-4.1557	3.24e-05	0.000210599
CNAG_06324	959.698	-0.718163	0.172884	-4.15403	3.27e-05	0.000211959
CNAG_03040	644.748	1.35486	0.326566	4.14882	3.34e-05	0.000216653
CNAG_05838	657.953	0.918037	0.221314	4.14813	3.35e-05	0.000217122
CNAG_04174	48.7174	1.57922	0.381151	4.14328	3.42e-05	0.000221573
CNAG_04350	816.309	0.793651	0.191707	4.13991	3.47e-05	0.000224665
CNAG_05613	1114.69	0.667195	0.161176	4.13955	3.48e-05	0.000224822
CNAG_00457	15900.4	-0.670739	0.162116	-4.1374	3.51e-05	0.000226742
CNAG_03061	912.623	-0.716716	0.173509	-4.13072	3.62e-05	0.000233093
CNAG_00853	1104.94	-0.711852	0.172334	-4.13066	3.62e-05	0.000233093
CNAG_04649	115.597	1.11827	0.270812	4.12932	3.64e-05	0.000234262
CNAG_02445	1269.61	-0.696206	0.168631	-4.12858	3.65e-05	0.000234816
CNAG_01954	147.991	2.91768	0.707158	4.12592	3.69e-05	0.000237343
CNAG_06406	1874.3	-0.833996	0.202292	-4.12274	3.74e-05	0.000240445
CNAG_04834	203.287	0.887427	0.215405	4.1198	3.79e-05	0.000243316
CNAG_02789	778.443	0.977195	0.237266	4.11857	3.81e-05	0.000244415
CNAG_12505	27.6288	1.91905	0.466355	4.11499	3.87e-05	0.000248032
CNAG_05772	827.254	0.653522	0.158827	4.11469	3.88e-05	0.000248143
CNAG_02342	274.176	0.832131	0.202307	4.1132	3.9e-05	0.000249538
CNAG_04564	385.528	0.74977	0.182414	4.11026	3.95e-05	0.000252518
CNAG_07628	4555.25	-0.960748	0.233755	-4.11007	3.96e-05	0.000252518
CNAG_02852	6328.89	-0.67302	0.163821	-4.10826	3.99e-05	0.000254287
CNAG_04841	133.38	1.26116	0.307005	4.10795	3.99e-05	0.000254411
CNAG_04465	1425.14	-0.858636	0.209072	-4.10689	4.01e-05	0.000255367
CNAG_03282	498.318	-0.837862	0.204087	-4.10541	4.04e-05	0.000256794
CNAG_03459	6599.44	-0.674265	0.16429	-4.1041	4.06e-05	0.000258031
CNAG_06875	372.627	0.723756	0.176452	4.10171	4.1e-05	0.000260493
CNAG_03013	626.508	0.793125	0.193391	4.10115	4.11e-05	0.000260901
CNAG_02071	1396.26	1.05233	0.256664	4.10002	4.13e-05	0.000261923
CNAG_00007	1688.09	-0.832852	0.203141	-4.09986	4.13e-05	0.000261923
CNAG_07509	1301.22	-0.723413	0.176492	-4.09885	4.15e-05	0.000262855
CNAG_01207	422.806	0.733351	0.179044	4.09592	4.2e-05	0.000265971
CNAG_00502	2194.74	-0.94253	0.23014	-4.09546	4.21e-05	0.000266274
CNAG_00607	1573.14	-0.806159	0.196883	-4.09461	4.23e-05	0.000267032
CNAG_02563	122.807	1.5652	0.382605	4.09091	4.3e-05	0.000271108
CNAG_00828	100.201	1.0714	0.261947	4.09012	4.31e-05	0.000271804
CNAG_05586	373.845	0.797687	0.195101	4.08858	4.34e-05	0.000273387
CNAG_01104	1523.5	-0.758469	0.185561	-4.08743	4.36e-05	0.000274509
CNAG_05413	143.298	1.10343	0.270093	4.08535	4.4e-05	0.000276664
CNAG_02332	812.869	-0.757886	0.185518	-4.08523	4.4e-05	0.000276664
CNAG_02745	815.223	0.993245	0.24317	4.08457	4.42e-05	0.000277219
CNAG_05860	210.313	0.988073	0.242055	4.08201	4.46e-05	0.000280055
CNAG_03276	345.232	-0.821964	0.201426	-4.08073	4.49e-05	0.000281375
CNAG_07824	283.32	0.83479	0.204624	4.07963	4.51e-05	0.00028248
CNAG_04729	1906.68	-0.797125	0.195517	-4.07701	4.56e-05	0.000285431
CNAG_07778	7030.19	-0.665629	0.163334	-4.07526	4.6e-05	0.000287353
CNAG_00292	4198.39	-0.655315	0.160835	-4.07445	4.61e-05	0.000287907
CNAG_00515	224.833	1.00935	0.247729	4.07443	4.61e-05	0.000287907
CNAG_03263	4985.48	-0.794762	0.195149	-4.07259	4.65e-05	0.000289945
CNAG_03153	4710.94	-0.735405	0.180678	-4.07026	4.7e-05	0.000292427
CNAG_03752	106.541	1.19112	0.292642	4.07022	4.7e-05	0.000292427
CNAG_03071	142.121	1.06256	0.26108	4.06985	4.7e-05	0.00029265
CNAG_00307	2388.11	-0.650466	0.159981	-4.0659	4.78e-05	0.000297405
CNAG_07625	1866.22	-0.699643	0.172099	-4.06535	4.8e-05	0.000297742
CNAG_06872	54.044	1.3648	0.335722	4.06526	4.8e-05	0.000297742
CNAG_03786	434.804	-0.707689	0.174153	-4.0636	4.83e-05	0.00029953
CNAG_00716	21284.4	-0.849561	0.209073	-4.06348	4.83e-05	0.00029953
CNAG_12285	182.278	1.06572	0.262307	4.06288	4.85e-05	0.000300052
CNAG_04443	1559.23	1.17212	0.288535	4.06232	4.86e-05	0.000300525
CNAG_01758	74.4614	1.34436	0.330973	4.06183	4.87e-05	0.00030091
CNAG_00195	1154.73	-0.829057	0.204134	-4.06134	4.88e-05	0.000301296
CNAG_05325	76.4107	1.34398	0.331063	4.05959	4.92e-05	0.000303316
CNAG_01703	365.823	0.811177	0.199866	4.0586	4.94e-05	0.000304257
CNAG_02488	91.9024	1.08233	0.266684	4.05848	4.94e-05	0.000304257
CNAG_01244	69.9094	1.25901	0.310345	4.05681	4.97e-05	0.000306191
CNAG_01069	40.9098	1.94881	0.48041	4.05656	4.98e-05	0.000306273
CNAG_06079	3143.1	-0.722715	0.178179	-4.05612	4.99e-05	0.000306426
CNAG_07862	320.058	-0.773114	0.190607	-4.05606	4.99e-05	0.000306426
CNAG_03275	378.039	-0.771231	0.190292	-4.05288	5.06e-05	0.000310369
CNAG_12360	350.43	-0.956327	0.23603	-4.05171	5.08e-05	0.000311673
CNAG_01271	2301.87	-0.719727	0.177678	-4.05073	5.11e-05	0.000312727
CNAG_01603	2205.66	0.70268	0.173555	4.04874	5.15e-05	0.000315149
CNAG_00279	3511.48	-0.939274	0.232095	-4.04693	5.19e-05	0.000317197
CNAG_06051	720.498	1.02283	0.252748	4.04684	5.19e-05	0.000317197
CNAG_06630	3307.89	-0.770417	0.190511	-4.04395	5.26e-05	0.000320871
CNAG_06200	541.913	0.820662	0.203353	4.03565	5.45e-05	0.000332165
CNAG_04044	1658.07	-0.792452	0.196484	-4.03316	5.5e-05	0.000335437
CNAG_02854	926.731	-0.69439	0.172203	-4.03239	5.52e-05	0.000336259
CNAG_05254	473.673	0.845297	0.209684	4.03129	5.55e-05	0.000337571
CNAG_04347	2712.33	-0.645686	0.160245	-4.02937	5.59e-05	0.000340073
CNAG_00905	77.1646	1.27787	0.317158	4.02912	5.6e-05	0.000340157
CNAG_12900	37.1107	-1.58855	0.394289	-4.0289	5.6e-05	0.000340192
CNAG_03702	821.355	-0.762178	0.189314	-4.02599	5.67e-05	0.000344071
CNAG_06594	4072.98	-0.783319	0.194572	-4.02586	5.68e-05	0.000344071
CNAG_06641	1825.3	-0.687102	0.170739	-4.02429	5.71e-05	0.000346091
CNAG_07797	967.365	-0.646506	0.160668	-4.02386	5.73e-05	0.000346454
CNAG_02381	14.9492	2.71216	0.674163	4.023	5.75e-05	0.000347304
CNAG_03336	1179.53	0.637241	0.158403	4.0229	5.75e-05	0.000347304
CNAG_05759	5219.6	-0.763896	0.189908	-4.02245	5.76e-05	0.000347688
CNAG_05701	4608.82	-0.69811	0.17366	-4.01999	5.82e-05	0.00035107
CNAG_06242	1197.49	-1.09892	0.273942	-4.01149	6.03e-05	0.000363462
CNAG_06224	920.33	-0.767381	0.191299	-4.01143	6.04e-05	0.000363462
CNAG_06521	77.5455	1.13053	0.281893	4.01048	6.06e-05	0.000364633
CNAG_01915	4747.18	-0.967346	0.24125	-4.00973	6.08e-05	0.000365502
CNAG_04979	84.6624	1.30173	0.324858	4.00708	6.15e-05	0.000369327
CNAG_01040	55.0666	1.3505	0.337043	4.0069	6.15e-05	0.000369327
CNAG_00820	657.752	-0.771955	0.192721	-4.00556	6.19e-05	0.000371126
CNAG_02565	3167.19	-0.702886	0.175516	-4.00469	6.21e-05	0.000372201
CNAG_02027	482.385	0.857502	0.214295	4.00151	6.29e-05	0.000376897
CNAG_03242	195.539	0.891141	0.22271	4.00135	6.3e-05	0.000376897
CNAG_04341	577.253	0.735224	0.183774	4.00069	6.32e-05	0.000377648
CNAG_04957	1867.33	-0.604675	0.151259	-3.99763	6.4e-05	0.000382265
CNAG_05032	113.93	1.06665	0.267134	3.99293	6.53e-05	0.000389614
CNAG_01239	343.041	-1.05999	0.265596	-3.99097	6.58e-05	0.00039253
CNAG_00718	1036.8	0.644968	0.161786	3.98656	6.7e-05	0.000399588
CNAG_01769	1123.88	-0.621431	0.156047	-3.98233	6.82e-05	0.00040644
CNAG_00302	452.611	0.847458	0.212953	3.97955	6.9e-05	0.000410654
CNAG_02799	145.39	-1.09439	0.275006	-3.9795	6.91e-05	0.000410654
CNAG_01395	2760.77	-0.659814	0.165858	-3.97819	6.94e-05	0.000412612
CNAG_03618	610.411	0.855686	0.215165	3.97687	6.98e-05	0.000414567
CNAG_07449	124.858	0.989616	0.248868	3.97647	6.99e-05	0.000414938
CNAG_06617	569.114	0.790975	0.198968	3.97539	7.03e-05	0.000416364
CNAG_02574	211.733	0.98477	0.247723	3.97528	7.03e-05	0.000416364
CNAG_03417	379.517	0.741874	0.186691	3.97382	7.07e-05	0.000418606
CNAG_00177	74.775	1.23973	0.312214	3.97078	7.16e-05	0.00042365
CNAG_00793	2808.56	-0.697322	0.175743	-3.96785	7.25e-05	0.000428563
CNAG_07989	784.414	0.712569	0.17962	3.9671	7.28e-05	0.000429572
CNAG_03418	1923.76	0.788357	0.1989	3.96359	7.38e-05	0.000435595
CNAG_04520	208.797	0.812121	0.205002	3.96152	7.45e-05	0.00043905
CNAG_05750	43252.5	-0.692375	0.174843	-3.95997	7.5e-05	0.000441555
CNAG_03960	446.32	0.775256	0.19579	3.95963	7.51e-05	0.000441847
CNAG_13110	149.082	1.10202	0.278541	3.95638	7.61e-05	0.000447542
CNAG_01344	741.166	0.738852	0.186924	3.95269	7.73e-05	0.000454153
CNAG_06512	520.87	0.882061	0.223171	3.9524	7.74e-05	0.000454351
CNAG_03128	568.285	-0.788627	0.199686	-3.94933	7.84e-05	0.000459866
CNAG_03167	835.083	-0.775291	0.196337	-3.94877	7.86e-05	0.000460575
CNAG_06326	513.089	0.907959	0.230262	3.94315	8.04e-05	0.000471142
CNAG_02870	1240.82	-0.653772	0.165855	-3.94184	8.09e-05	0.000473366
CNAG_07740	4066.74	-0.648838	0.164644	-3.94087	8.12e-05	0.000474919
CNAG_04254	134.946	0.938741	0.238434	3.93712	8.25e-05	0.000482022
CNAG_05529	229.794	1.16723	0.296546	3.93609	8.28e-05	0.000483709
CNAG_03978	872.547	0.659354	0.167554	3.93518	8.31e-05	0.000485169
CNAG_07344	181.481	0.856669	0.217766	3.93389	8.36e-05	0.000487406
CNAG_05899	2685.16	-0.724123	0.184228	-3.93057	8.47e-05	0.0004938
CNAG_05559	818.166	0.693517	0.176535	3.9285	8.55e-05	0.000497691
CNAG_04322	2809.01	2.21432	0.563743	3.92788	8.57e-05	0.000498594
CNAG_01583	2014.33	-0.659289	0.167958	-3.92532	8.66e-05	0.000503539
CNAG_03006	46.2253	1.54006	0.392363	3.92509	8.67e-05	0.00050363
CNAG_04737	1157.84	1.01834	0.259611	3.92257	8.76e-05	0.000508275
CNAG_03270	2704.26	-0.783476	0.199738	-3.92251	8.76e-05	0.000508275
CNAG_00238	7545.14	-0.72402	0.184596	-3.92218	8.78e-05	0.000508579
CNAG_02082	391.615	-0.841032	0.214455	-3.92171	8.79e-05	0.000509184
CNAG_07902	884.269	0.688349	0.175624	3.91945	8.88e-05	0.000513582
CNAG_05574	318.1	0.837064	0.213602	3.9188	8.9e-05	0.000514582
CNAG_04777	499.478	-0.893081	0.227938	-3.91809	8.93e-05	0.000515711
CNAG_02233	434.248	0.953753	0.243472	3.9173	8.95e-05	0.000516908
CNAG_00357	183.382	0.90789	0.23178	3.91704	8.96e-05	0.000516908
CNAG_02479	60.773	1.23391	0.315016	3.91697	8.97e-05	0.000516908
CNAG_02191	1062.19	-0.824135	0.210488	-3.91536	9.03e-05	0.000519972
CNAG_01451	2060.95	-0.926745	0.236722	-3.91491	9.04e-05	0.000520556
CNAG_03827	637.843	0.660665	0.168906	3.91143	9.18e-05	0.000527711
CNAG_02035	7114.79	-0.876479	0.224156	-3.91012	9.23e-05	0.000530175
CNAG_01962	323.894	-0.960757	0.245819	-3.90838	9.29e-05	0.000533591
CNAG_02996	336.437	0.752434	0.192543	3.90788	9.31e-05	0.000534289
CNAG_04692	1240.94	-0.762957	0.195304	-3.90651	9.36e-05	0.000536831
CNAG_02705	305.706	0.978734	0.250548	3.90637	9.37e-05	0.000536831
CNAG_06948	2389.28	-0.741567	0.189944	-3.90414	9.46e-05	0.000541154
CNAG_04260	2464.44	-0.620408	0.158913	-3.90406	9.46e-05	0.000541154
CNAG_04882	881.892	-0.697486	0.178723	-3.90262	9.52e-05	0.000543987
CNAG_06238	103.509	1.50962	0.386918	3.90165	9.55e-05	0.000545757
CNAG_07392	275.581	-0.774842	0.198626	-3.90101	9.58e-05	0.00054678
CNAG_07651	555.466	0.755525	0.193808	3.89832	9.69e-05	0.00055248
CNAG_05639	292.922	0.743259	0.19072	3.89712	9.73e-05	0.00055481
CNAG_03985	2910.04	-0.844898	0.217082	-3.89208	9.94e-05	0.000565894
CNAG_02685	578.819	2.36085	0.606599	3.89195	9.94e-05	0.000565894
CNAG_04213	682.136	0.811509	0.208577	3.89069	0.0001	0.000568419
CNAG_04701	620.57	-0.873841	0.22463	-3.89013	0.000100189	0.000569095
CNAG_07356	5391.26	-0.667608	0.17162	-3.89004	0.000100229	0.000569095
CNAG_01442	2288.88	-0.642025	0.165169	-3.88708	0.000101456	0.000575632
CNAG_01611	348.01	0.921774	0.237256	3.88515	0.000102267	0.00057949
CNAG_06567	799.355	0.754949	0.194319	3.88509	0.00010229	0.00057949
CNAG_05641	16.1706	2.69473	0.694339	3.881	0.000104029	0.0005889
CNAG_04860	1963.9	0.624845	0.161151	3.8774	0.000105578	0.000597223
CNAG_00401	311.535	0.875452	0.225881	3.87572	0.000106312	0.000600919
CNAG_03587	221.272	0.912836	0.235563	3.87512	0.000106571	0.000601888
CNAG_06384	165.45	1.29486	0.33416	3.87496	0.000106642	0.000601888
CNAG_00450	3527.05	-0.802041	0.207057	-3.87352	0.000107276	0.000605012
CNAG_12074	15.7939	-2.33399	0.602974	-3.87079	0.000108484	0.000611294
CNAG_01715	1825.49	-0.860046	0.222198	-3.87064	0.000108552	0.000611294
CNAG_04192	3986.71	-0.668835	0.172831	-3.86988	0.00010889	0.00061274
CNAG_04372	2069.88	-0.59112	0.15285	-3.86733	0.000110032	0.000618706
CNAG_01197	2430.43	-0.664963	0.172014	-3.86575	0.000110747	0.000622263
CNAG_04845	1101.64	-0.596175	0.154261	-3.86471	0.000111223	0.00062447
CNAG_03060	106.06	1.06203	0.274822	3.86442	0.000111355	0.000624744
CNAG_06147	7145.89	-0.719289	0.186202	-3.86295	0.000112027	0.00062805
CNAG_01102	804.992	1.28577	0.333034	3.86079	0.000113023	0.000633162
CNAG_03777	92.1566	1.28771	0.33375	3.85831	0.000114175	0.000639142
CNAG_05733	992.533	0.740837	0.19203	3.85793	0.00011435	0.00063965
CNAG_06822	111.568	0.946483	0.245389	3.85707	0.000114753	0.000641427
CNAG_01141	1177.2	-0.707744	0.183695	-3.85281	0.000116768	0.000652205
CNAG_05638	7501.3	0.856096	0.22238	3.8497	0.000118262	0.000660063
CNAG_03719	84.0884	1.49005	0.387227	3.848	0.000119085	0.000664168
CNAG_06511	802.029	1.04627	0.27212	3.84488	0.000120611	0.000672182
CNAG_03479	1117.53	0.771328	0.200789	3.84149	0.000122292	0.000681042
CNAG_04220	539.833	0.653636	0.170161	3.84127	0.000122398	0.000681131
CNAG_02490	471.846	0.77401	0.20158	3.83971	0.00012318	0.000684599
CNAG_06207	172.13	0.811868	0.211443	3.83966	0.000123202	0.000684599
CNAG_02156	525.3	0.748676	0.195025	3.83888	0.000123598	0.000686293
CNAG_01918	243.735	1.05728	0.275476	3.83803	0.000124026	0.000688163
CNAG_03318	102.076	1.07288	0.279609	3.83708	0.000124504	0.000689813
CNAG_05653	515.357	-0.846985	0.220737	-3.83708	0.000124506	0.000689813
CNAG_01432	1741.31	-0.711582	0.185467	-3.83671	0.000124693	0.000690341
CNAG_03097	280.342	0.729212	0.190074	3.83647	0.000124815	0.000690507
CNAG_07876	38.7849	-1.69132	0.441156	-3.83385	0.000126155	0.000697002
CNAG_05180	305.312	0.874155	0.228012	3.83381	0.000126173	0.000697002
CNAG_07609	1787.96	-0.717379	0.187347	-3.82914	0.00012859	0.000709826
CNAG_03012	19752.1	-0.636619	0.166264	-3.82897	0.000128683	0.000709826
CNAG_13118	35.5139	1.58009	0.413002	3.82587	0.000130312	0.000718286
CNAG_04970	389.818	-0.877159	0.229352	-3.8245	0.000131037	0.000721758
CNAG_01044	644.843	0.807397	0.211169	3.82346	0.000131592	0.000724282
CNAG_07596	69.1276	1.3193	0.345211	3.82173	0.000132519	0.000728856
CNAG_01419	637.939	0.647621	0.169561	3.81939	0.000133781	0.000735257
CNAG_06033	815.466	0.777742	0.203658	3.81886	0.000134067	0.000736297
CNAG_00374	312.358	0.727035	0.190444	3.81758	0.000134766	0.000739595
CNAG_02404	6092.7	0.663498	0.173812	3.81734	0.0001349	0.000739792
CNAG_01718	404.749	0.710956	0.186259	3.81703	0.000135067	0.000740168
CNAG_02047	331.01	-1.07396	0.281539	-3.81459	0.000136408	0.00074698
CNAG_03353	2764.26	-0.658892	0.172741	-3.81433	0.000136551	0.000747219
CNAG_01431	110.031	1.29874	0.340699	3.81198	0.00013786	0.000753833
CNAG_04104	444.831	-0.738851	0.193878	-3.81091	0.000138457	0.000756552
CNAG_07997	80.8934	1.14015	0.299364	3.80859	0.000139762	0.00076313
CNAG_01943	2701.98	-0.647369	0.170055	-3.80681	0.000140769	0.000768074
CNAG_05973	85.0958	1.14555	0.301246	3.80272	0.000143119	0.000780329
CNAG_02567	1944	-0.597059	0.157019	-3.80247	0.000143263	0.000780409
CNAG_07576	1107.14	-0.920416	0.242066	-3.80233	0.00014334	0.000780409
CNAG_00904	14.188	-2.53265	0.666323	-3.80093	0.000144153	0.000784267
CNAG_12434	329.284	-1.10826	0.291892	-3.7968	0.000146573	0.00079686
CNAG_05001	1168	-0.776134	0.204446	-3.79628	0.000146883	0.000797967
CNAG_00902	728.307	-0.736397	0.194075	-3.79439	0.000148005	0.000803485
CNAG_00491	815.208	-0.834007	0.219849	-3.79354	0.000148514	0.00080567
CNAG_04195	447.163	0.932646	0.245899	3.7928	0.000148958	0.000806987
CNAG_03404	153.841	1.09352	0.288317	3.79278	0.000148971	0.000806987
CNAG_00305	9318.04	0.82931	0.21875	3.79113	0.000149965	0.000811792
CNAG_06652	132.027	0.938324	0.247637	3.78912	0.000151184	0.000817803
CNAG_02001	520.262	0.843274	0.222594	3.78839	0.000151629	0.000819296
CNAG_01687	1671.87	-0.791291	0.208877	-3.78831	0.000151677	0.000819296
CNAG_01898	1749.23	-0.864031	0.228381	-3.78329	0.000154767	0.000835172
CNAG_04546	23.5472	-1.7707	0.468045	-3.78318	0.000154838	0.000835172
CNAG_04151	792.417	0.91567	0.242161	3.78124	0.000156048	0.000841097
CNAG_03612	5896.22	-0.737174	0.194986	-3.78065	0.000156418	0.00084249
CNAG_06382	326.312	0.683501	0.180882	3.77872	0.000157638	0.000848459
CNAG_12258	252.095	-0.915584	0.242541	-3.77497	0.000160028	0.000860476
CNAG_05597	736.438	-0.638106	0.169048	-3.7747	0.000160199	0.000860476
CNAG_00838	397.566	0.825535	0.218703	3.77468	0.000160213	0.000860476
CNAG_07514	1396.01	0.726278	0.192423	3.77439	0.000160397	0.000860853
CNAG_05679	2361.54	-0.592905	0.157236	-3.77079	0.000162734	0.000872374
CNAG_06405	776.1	0.669085	0.177442	3.77072	0.000162775	0.000872374
CNAG_05124	1398.93	-0.616301	0.16348	-3.7699	0.000163316	0.000874648
CNAG_05095	213.236	1.25756	0.333613	3.7695	0.000163576	0.000875419
CNAG_06608	1622.57	-0.915304	0.243022	-3.76635	0.000165651	0.0008859
CNAG_03724	2992.42	-0.977929	0.259678	-3.76593	0.000165927	0.000886746
CNAG_03454	472.281	-2.65272	0.704894	-3.76329	0.00016769	0.000895534
CNAG_04872	2327.04	-0.611174	0.162462	-3.76195	0.000168595	0.000899731
CNAG_03641	4800.3	-0.715914	0.190425	-3.75956	0.00017021	0.000907708
CNAG_06428	916.859	0.857287	0.228245	3.756	0.000172652	0.000920079
CNAG_03324	805.167	0.738662	0.196733	3.75464	0.00017359	0.000924424
CNAG_00303	22.0816	1.93818	0.51699	3.74896	0.000177567	0.00094482
CNAG_02704	2264.3	-0.809107	0.21583	-3.74882	0.00017767	0.00094482
CNAG_05483	787.156	-0.73618	0.196469	-3.74705	0.000178926	0.000950826
CNAG_06277	3250.34	-0.676474	0.18055	-3.74675	0.000179143	0.000951309
CNAG_00166	1011.08	-0.740679	0.197736	-3.74579	0.000179826	0.000954265
CNAG_04687	7782.64	0.644685	0.17216	3.74468	0.000180622	0.000957817
CNAG_01465	68.0035	1.17518	0.314084	3.74163	0.000182833	0.00096886
CNAG_03808	742.604	0.893366	0.238796	3.74113	0.000183197	0.000970109
CNAG_07332	276.049	0.747265	0.199767	3.74068	0.00018352	0.000971136
CNAG_03092	690.571	0.665752	0.17799	3.74039	0.000183734	0.000971573
CNAG_05824	329.911	0.748138	0.200034	3.74005	0.000183981	0.000971573
CNAG_06359	565.703	0.744212	0.198985	3.74004	0.000183988	0.000971573
CNAG_06798	1807.33	-0.829844	0.22195	-3.73888	0.000184845	0.000975414
CNAG_00387	349.284	0.688686	0.184222	3.73836	0.000185227	0.000976745
CNAG_07567	1706.43	-0.791645	0.211878	-3.73632	0.000186731	0.000983988
CNAG_03366	238.877	0.826988	0.221352	3.73608	0.000186912	0.000984256
CNAG_03135	627.386	0.664276	0.177841	3.73523	0.000187546	0.000986903
CNAG_00137	1058.73	0.632939	0.169469	3.73484	0.000187832	0.000987724
CNAG_01929	262.98	0.86154	0.230788	3.73304	0.000189182	0.000994127
CNAG_01551	588.141	0.645449	0.173025	3.73037	0.000191196	0.00100401
CNAG_00290	717.248	0.756576	0.202967	3.72759	0.000193321	0.00101446
CNAG_00797	4009.37	-0.6647	0.178403	-3.72583	0.000194673	0.00102085
CNAG_04922	122.385	0.921119	0.247454	3.72238	0.000197353	0.00103418
CNAG_01317	1397.13	-0.678454	0.182351	-3.7206	0.000198751	0.00104079
CNAG_04537	659.418	0.629681	0.169251	3.7204	0.000198911	0.0010409
CNAG_05982	78.9741	1.08695	0.292309	3.71848	0.000200425	0.0010481
CNAG_07991	813.84	-0.870727	0.234271	-3.71674	0.000201806	0.00105459
CNAG_00708	1327.64	-0.580402	0.156306	-3.71324	0.00020462	0.00106837
CNAG_03248	1292.34	0.588099	0.158384	3.71311	0.000204725	0.00106837
CNAG_05761	1572.24	-0.624472	0.168314	-3.71016	0.000207127	0.00107977
CNAG_06628	1397.76	-0.827974	0.223169	-3.71008	0.000207197	0.00107977
CNAG_01610	47.9809	1.72344	0.464583	3.70964	0.00020755	0.00108087
CNAG_06801	300.174	1.05875	0.285537	3.70792	0.00020897	0.00108751
CNAG_05913	373.17	0.682522	0.184087	3.7076	0.000209236	0.00108814
CNAG_05107	1495.96	-0.67417	0.181891	-3.70645	0.000210189	0.00109234
CNAG_12538	29.1875	1.69209	0.456747	3.70466	0.000211674	0.00109931
CNAG_02750	428.414	-0.813937	0.219722	-3.7044	0.000211894	0.00109969
CNAG_00346	451.213	-0.798292	0.215568	-3.70321	0.00021289	0.0011041
CNAG_00769	1045.98	0.653151	0.176596	3.69855	0.000216835	0.00112379
CNAG_04627	967.727	-0.661177	0.178856	-3.6967	0.000218422	0.00113123
CNAG_03467	148.537	0.829469	0.224606	3.69299	0.00022163	0.00114706
CNAG_02348	372.981	-0.786772	0.213266	-3.68915	0.000225001	0.00116372
CNAG_01528	1501.96	-0.579237	0.157067	-3.68784	0.00022617	0.00116837
CNAG_02675	2175.84	-0.825552	0.223861	-3.68779	0.000226211	0.00116837
CNAG_03782	17.242	2.5887	0.702128	3.68693	0.000226979	0.00117153
CNAG_00351	954.273	-0.616612	0.167307	-3.68552	0.000228238	0.00117723
CNAG_02374	170.572	1.08433	0.294239	3.68521	0.000228511	0.00117783
CNAG_05011	1185.51	-0.821282	0.222913	-3.68432	0.000229314	0.00118116
CNAG_01839	2053.06	-0.630777	0.171686	-3.67401	0.000238777	0.00122907
CNAG_02948	7123.02	-0.617324	0.168051	-3.67342	0.000239323	0.00123104
CNAG_01885	1185.57	-0.759223	0.206991	-3.6679	0.000244547	0.00125705
CNAG_06063	1337.22	-0.61389	0.167406	-3.66707	0.000245342	0.00126028
CNAG_02103	265.667	0.784036	0.213917	3.66514	0.000247199	0.00126895
CNAG_00084	3049.03	-0.5937	0.161995	-3.66494	0.000247398	0.00126911
CNAG_03289	959.623	-0.654126	0.178528	-3.664	0.000248304	0.00127289
CNAG_00921	1025.69	0.953851	0.260508	3.66151	0.000250734	0.00128448
CNAG_00761	1581.29	-0.677715	0.185115	-3.66104	0.000251194	0.00128596
CNAG_02979	409.735	0.892598	0.243918	3.65942	0.000252785	0.00129323
CNAG_02470	290.557	-0.736162	0.20123	-3.6583	0.000253891	0.00129801
CNAG_07684	49.6846	-1.2378	0.338469	-3.65705	0.000255133	0.00130347
CNAG_07409	2253.25	-0.655036	0.179127	-3.65683	0.000255355	0.00130373
CNAG_03050	124.814	1.02331	0.279863	3.65645	0.000255731	0.00130476
CNAG_04691	35.2975	1.55115	0.424327	3.65555	0.000256627	0.00130845
CNAG_06454	920.566	-0.659096	0.180459	-3.65232	0.000259882	0.00132415
CNAG_06534	2879.92	-0.696684	0.190774	-3.65189	0.000260317	0.00132487
CNAG_03841	1572.98	0.634166	0.173657	3.65183	0.000260374	0.00132487
CNAG_04062	2599.08	-0.772604	0.211642	-3.65053	0.0002617	0.00133072
CNAG_05365	2864.63	-0.62083	0.170104	-3.64971	0.000262541	0.0013341
CNAG_12217	420.174	0.83586	0.229063	3.64904	0.000263221	0.00133665
CNAG_03494	1653.91	-0.617478	0.169237	-3.6486	0.000263672	0.00133804
CNAG_04835	220.626	0.912035	0.250048	3.64744	0.000264864	0.00134319
CNAG_06435	968.647	-0.620366	0.170165	-3.64567	0.000266698	0.00135158
CNAG_00794	1184.23	0.626342	0.171896	3.64372	0.000268726	0.00136094
CNAG_02907	1107.73	-0.656861	0.18032	-3.64275	0.000269743	0.00136518
CNAG_06467	1041.25	-0.687672	0.18883	-3.64175	0.000270787	0.00136954
CNAG_02692	3159.21	1.01919	0.279885	3.64144	0.000271116	0.00136957
CNAG_03493	329.941	0.691576	0.18992	3.6414	0.000271155	0.00136957
CNAG_05034	850.09	0.590045	0.162169	3.63846	0.000274276	0.00138441
CNAG_06913	325.941	0.89503	0.246082	3.63713	0.000275697	0.00139065
CNAG_04043	281.671	1.00878	0.277461	3.63574	0.000277182	0.00139721
CNAG_06153	5064.48	0.667533	0.183633	3.63515	0.000277817	0.00139947
CNAG_02878	1317.59	-0.594316	0.163502	-3.63491	0.000278073	0.00139982
CNAG_03147	1239.79	-0.553084	0.152177	-3.63448	0.000278537	0.00140123
CNAG_03159	283.92	-0.722976	0.198982	-3.63338	0.000279734	0.00140631
CNAG_06781	721.555	-0.800795	0.220477	-3.6321	0.000281122	0.00141235
CNAG_02525	110.302	0.940342	0.258933	3.6316	0.000281666	0.00141414
CNAG_01142	501.56	0.651991	0.179614	3.62996	0.000283461	0.00142221
CNAG_01760	67.6953	1.33765	0.36867	3.62831	0.000285278	0.00143037
CNAG_05558	606.029	0.888694	0.245101	3.62583	0.000288037	0.00144324
CNAG_06966	73.8421	1.13538	0.313196	3.62516	0.000288788	0.00144605
CNAG_04320	1836.3	0.742357	0.204846	3.62397	0.000290113	0.00145151
CNAG_02527	482.946	0.983966	0.271526	3.62384	0.000290263	0.00145151
CNAG_05260	2094.3	0.828454	0.228772	3.62131	0.00029312	0.00146482
CNAG_02076	2054.38	-0.67961	0.187731	-3.62014	0.000294446	0.00147007
CNAG_00277	308.776	0.671421	0.185477	3.61998	0.000294631	0.00147007
CNAG_06265	260.483	0.740637	0.204603	3.61987	0.000294755	0.00147007
CNAG_12311	46.8664	1.26038	0.348455	3.61705	0.000297984	0.00148519
CNAG_00679	54.5627	1.19052	0.329184	3.61657	0.00029853	0.00148693
CNAG_01658	384.413	0.966382	0.267364	3.61448	0.000300952	0.00149801
CNAG_01417	195.296	1.29914	0.359702	3.6117	0.0003042	0.00151318
CNAG_00273	343.651	-0.808823	0.223992	-3.61095	0.000305078	0.00151643
CNAG_02719	63.6412	1.15582	0.3201	3.6108	0.000305256	0.00151643
CNAG_06570	117.824	0.973739	0.269715	3.61025	0.000305903	0.00151865
CNAG_00891	5952.1	-0.589218	0.163263	-3.60902	0.000307361	0.00152488
CNAG_01335	678.032	0.685785	0.190032	3.60878	0.000307641	0.00152527
CNAG_00593	790.705	-0.617054	0.171011	-3.60827	0.000308243	0.00152725
CNAG_02419	341.86	0.74224	0.205779	3.60697	0.000309794	0.00153393
CNAG_07474	339.285	0.808094	0.224099	3.60597	0.000310983	0.00153881
CNAG_06119	102.018	1.00984	0.280143	3.60475	0.00031245	0.00154505
CNAG_04038	208.109	0.817071	0.226683	3.60447	0.000312788	0.00154571
CNAG_01711	1900.03	-0.678653	0.188296	-3.60419	0.000313126	0.00154637
CNAG_12122	53.4742	1.17571	0.32626	3.60359	0.000313858	0.00154897
CNAG_00017	228.067	0.75718	0.210142	3.60318	0.000314343	0.00155035
CNAG_02356	964.404	-0.640973	0.177921	-3.60257	0.000315091	0.00155302
CNAG_04874	301.989	0.770751	0.214153	3.59907	0.000319353	0.001573
CNAG_04376	2427.47	-0.945988	0.262947	-3.59763	0.000321126	0.0015807
CNAG_01813	7267.74	-0.538636	0.149733	-3.5973	0.000321535	0.00158168
CNAG_05784	287.33	0.736894	0.204895	3.59646	0.00032258	0.00158499
CNAG_05880	905.444	-0.625547	0.173936	-3.59642	0.000322626	0.00158499
CNAG_03044	489.801	-0.62291	0.173219	-3.59608	0.000323044	0.00158601
CNAG_06654	616.716	-0.642804	0.178828	-3.59454	0.000324969	0.00159442
CNAG_05388	331.794	-0.83773	0.233223	-3.59196	0.000328197	0.00160921
CNAG_01635	288.765	0.7494	0.208645	3.59175	0.000328466	0.00160948
CNAG_01853	1273.51	-0.684062	0.190502	-3.59085	0.000329607	0.00161402
CNAG_00571	38.4619	1.60555	0.447247	3.58985	0.000330872	0.00161917
CNAG_04137	29.5995	1.88555	0.525559	3.5877	0.000333611	0.00163152
CNAG_02594	263.581	0.778189	0.216947	3.58699	0.000334515	0.00163343
CNAG_03144	2120.71	-0.635621	0.177206	-3.58691	0.000334616	0.00163343
CNAG_07830	450.599	0.630347	0.175741	3.5868	0.000334758	0.00163343
CNAG_06424	860.221	0.754478	0.210353	3.58672	0.000334867	0.00163343
CNAG_07600	116.961	0.943588	0.263163	3.58556	0.000336352	0.00163961
CNAG_06473	842.856	0.578853	0.161569	3.58271	0.000340051	0.00165657
CNAG_00108	3082.8	-0.714395	0.199434	-3.58212	0.000340818	0.00165924
CNAG_04760	1630.85	0.873326	0.243903	3.58063	0.000342765	0.00166764
CNAG_02765	71.3769	1.08717	0.303651	3.58032	0.000343176	0.00166856
CNAG_02192	36.5288	1.48357	0.414425	3.57981	0.000343838	0.0016707
CNAG_03871	1129.62	-0.675848	0.18888	-3.57818	0.000345995	0.0016801
CNAG_03672	1344.44	-0.707564	0.197759	-3.57792	0.000346343	0.00168071
CNAG_04297	532.661	-0.71598	0.20019	-3.57649	0.000348233	0.0016888
CNAG_04582	81.7069	0.988482	0.276424	3.57597	0.000348935	0.00169111
CNAG_03688	1066.29	1.05233	0.294937	3.56799	0.000359735	0.00174234
CNAG_04810	260.094	-0.771526	0.21626	-3.56759	0.000360276	0.00174384
CNAG_01579	207.606	1.22996	0.344779	3.56738	0.000360562	0.0017441
CNAG_03807	194.668	0.759837	0.213153	3.56475	0.0003642	0.00176057
CNAG_05811	972.906	-0.564505	0.158397	-3.56386	0.000365438	0.00176542
CNAG_03634	1436.85	-0.585133	0.164349	-3.5603	0.000370431	0.0017884
CNAG_03588	6335.11	-0.523181	0.146973	-3.5597	0.000371278	0.00179135
CNAG_02020	1559.16	-0.571558	0.160573	-3.55949	0.000371576	0.00179164
CNAG_05299	16.8344	2.30699	0.648271	3.55868	0.00037273	0.00179605
CNAG_06524	45.9661	1.41129	0.39663	3.55821	0.000373393	0.0017981
CNAG_00612	165.918	0.999619	0.281272	3.55392	0.000379532	0.0018265
CNAG_01958	3735.29	-0.596504	0.167866	-3.55344	0.000380222	0.00182865
CNAG_02843	3734.34	0.943639	0.265875	3.54918	0.000386427	0.00185731
CNAG_06340	4096.7	-0.74762	0.210658	-3.54897	0.000386746	0.00185766
CNAG_04060	52.0065	1.24021	0.349576	3.54776	0.000388515	0.001864
CNAG_02063	758.999	0.795934	0.22435	3.54773	0.000388559	0.001864
CNAG_04307	633.247	-0.682461	0.192404	-3.54703	0.000389607	0.00186783
CNAG_00991	1418.35	-0.677283	0.191025	-3.54552	0.000391837	0.00187733
CNAG_05940	678.362	-0.82393	0.232408	-3.54519	0.000392326	0.00187848
CNAG_04052	382.686	1.02871	0.290228	3.54448	0.00039339	0.00188239
CNAG_12914	17.3887	2.22828	0.62891	3.54308	0.00039548	0.00189119
CNAG_01948	783.885	0.608354	0.171759	3.5419	0.000397259	0.00189789
CNAG_03954	798.253	-0.618973	0.174762	-3.54181	0.000397386	0.00189789
CNAG_04175	1720.18	-0.731245	0.20651	-3.54096	0.00039867	0.00190282
CNAG_01894	1838.89	-0.618888	0.174937	-3.53778	0.00040351	0.00192471
CNAG_06122	1288.15	-0.706845	0.199893	-3.53612	0.000406046	0.00193341
CNAG_05769	562.571	-0.618356	0.174869	-3.53611	0.000406062	0.00193341
CNAG_00512	3384.54	-0.515125	0.145677	-3.53608	0.000406104	0.00193341
CNAG_05621	1158.18	-0.645786	0.182697	-3.53474	0.000408179	0.00194207
CNAG_03623	904.426	-0.649288	0.183727	-3.53399	0.000409337	0.00194635
CNAG_01132	1251.52	-0.6703	0.189753	-3.53248	0.000411676	0.00195587
CNAG_01502	349.62	0.715595	0.202582	3.53237	0.000411858	0.00195587
CNAG_05757	41.8127	1.60264	0.45381	3.53152	0.000413175	0.00196089
CNAG_00175	914.656	0.66071	0.187174	3.52992	0.00041569	0.00197159
CNAG_01268	71.5539	-1.03942	0.29465	-3.52763	0.0004193	0.00198746
CNAG_03811	575.392	0.642337	0.182109	3.5272	0.000419979	0.00198943
CNAG_05285	3427.52	-0.614635	0.174285	-3.5266	0.000420928	0.00199268
CNAG_03163	254.319	0.721576	0.204645	3.52598	0.000421913	0.00199609
CNAG_01843	5012.91	-0.597065	0.169355	-3.52553	0.000422636	0.00199825
CNAG_04276	1012.63	-0.603266	0.171147	-3.52483	0.000423749	0.00200226
CNAG_05505	308.075	0.8309	0.235807	3.52365	0.000425646	0.00200996
CNAG_07911	150.85	0.873665	0.248163	3.52053	0.000430685	0.00203249
CNAG_05066	107.474	0.982277	0.279137	3.51898	0.00043321	0.00204313
CNAG_05735	112.768	0.876118	0.249017	3.51831	0.000434306	0.00204701
CNAG_04889	179.346	0.782202	0.222379	3.51743	0.00043574	0.00205249
CNAG_03896	37.5912	1.57044	0.446568	3.51668	0.000436976	0.0020567
CNAG_03078	1172.68	0.622021	0.176883	3.51656	0.000437178	0.0020567
CNAG_06655	195.037	0.787223	0.223952	3.51513	0.000439534	0.0020665
CNAG_01088	553.994	-0.636008	0.180984	-3.51416	0.000441145	0.00207239
CNAG_00889	76.0633	1.04646	0.297794	3.51404	0.000441347	0.00207239
CNAG_00439	436.37	0.729406	0.207578	3.51388	0.000441613	0.00207239
CNAG_03309	1406.22	-0.745679	0.212253	-3.51316	0.000442812	0.00207673
CNAG_06598	40.5375	-1.40249	0.399513	-3.51051	0.000447244	0.00209621
CNAG_01155	2243.52	-0.548291	0.15622	-3.50973	0.00044857	0.00210112
CNAG_00293	2612.83	-0.5258	0.149853	-3.50877	0.000450177	0.00210734
CNAG_00533	3434.29	-0.574373	0.163708	-3.50853	0.000450597	0.002108
CNAG_01597	966.372	-0.6453	0.184022	-3.50664	0.000453803	0.00212168
CNAG_05016	30.9621	1.57744	0.449975	3.50562	0.000455543	0.0021285
CNAG_02926	640.36	-0.692314	0.197533	-3.5048	0.000456945	0.00213373
CNAG_03716	1168.47	-1.08319	0.309127	-3.50402	0.000458283	0.00213865
CNAG_06276	441.175	0.839215	0.239516	3.5038	0.000458677	0.00213917
CNAG_06898	1413.77	0.648708	0.185159	3.50352	0.000459147	0.00214004
CNAG_03225	16506.4	-0.749119	0.213888	-3.5024	0.000461094	0.00214779
CNAG_07029	618.097	0.698907	0.199567	3.50212	0.00046158	0.00214872
CNAG_07777	255.201	-0.728568	0.208095	-3.50114	0.000463275	0.00215529
CNAG_04667	558.307	-0.683508	0.195265	-3.50042	0.000464533	0.00215981
CNAG_01029	859.399	-0.601617	0.171927	-3.49926	0.000466545	0.00216783
CNAG_06227	391.551	0.605838	0.173368	3.49453	0.000474902	0.0022053
CNAG_13111	75.6777	1.14862	0.328848	3.49286	0.000477868	0.00221771
CNAG_05978	5123.84	-0.649833	0.186068	-3.49244	0.000478631	0.00221988
CNAG_07708	77.2653	1.03599	0.29683	3.49019	0.000482673	0.00223725
CNAG_12069	73.4269	1.11769	0.320356	3.48891	0.000484991	0.00224662
CNAG_07608	1423.17	-0.637608	0.182904	-3.48602	0.00049026	0.00226963
CNAG_03707	551.001	-0.671368	0.192686	-3.48425	0.000493514	0.0022833
CNAG_03662	2144.74	-0.726823	0.208722	-3.48225	0.000497213	0.002299
CNAG_02376	928.539	-0.564145	0.162029	-3.48174	0.000498158	0.00230196
CNAG_06864	2172.7	-0.612436	0.175949	-3.48077	0.000499976	0.00230895
CNAG_07926	3042.12	-0.543374	0.156131	-3.48025	0.000500947	0.00231202
CNAG_01112	719.008	0.824237	0.237	3.4778	0.000505551	0.00233151
CNAG_05620	590.039	0.683117	0.196429	3.47767	0.000505789	0.00233151
CNAG_05193	781.239	0.612595	0.176176	3.47717	0.000506738	0.00233446
CNAG_06915	97.9939	0.922593	0.265349	3.4769	0.000507242	0.00233535
CNAG_04456	439.326	0.618547	0.178024	3.47452	0.00051177	0.00235399
CNAG_06956	28.733	-1.92128	0.552975	-3.47444	0.000511913	0.00235399
CNAG_02254	11.5168	2.71526	0.781698	3.47354	0.000513644	0.00236051
CNAG_07704	21.364	-1.66389	0.479218	-3.4721	0.000516405	0.00237176
CNAG_04206	1111.77	1.98968	0.573135	3.47157	0.000517423	0.00237499
CNAG_04159	522.971	0.728952	0.210063	3.47017	0.000520137	0.00238599
CNAG_04059	20.3604	2.07866	0.599375	3.46805	0.000524241	0.00240335
CNAG_06670	1299.17	-0.605221	0.174595	-3.46643	0.000527425	0.00241648
CNAG_02693	509.79	-0.711368	0.205236	-3.4661	0.000528075	0.002418
CNAG_01534	142.612	0.860565	0.248345	3.4652	0.000529831	0.00242456
CNAG_01034	66.6612	1.04421	0.301739	3.46063	0.000538917	0.00246465
CNAG_00233	2311.38	-0.656534	0.189815	-3.45881	0.000542573	0.00247986
CNAG_12620	49.3515	1.36862	0.395714	3.45862	0.000542944	0.00248006
CNAG_05371	1562.54	-0.743834	0.215137	-3.45749	0.000545225	0.00248897
CNAG_07983	105.727	0.853677	0.24705	3.45548	0.000549305	0.00250608
CNAG_01567	222.885	0.833925	0.241449	3.45383	0.000552691	0.00252
CNAG_05694	3293.97	-0.52038	0.150723	-3.45255	0.000555311	0.00253042
CNAG_01707	947.914	0.604627	0.175138	3.45229	0.000555844	0.00253132
CNAG_02159	174.453	1.10846	0.321462	3.44817	0.000564389	0.00256869
CNAG_03233	98.345	1.00294	0.291025	3.44624	0.000568444	0.00258558
CNAG_00982	1748.48	-0.658484	0.191127	-3.44526	0.000570509	0.00259341
CNAG_03633	169.868	1.10668	0.321269	3.4447	0.000571695	0.00259724
CNAG_00975	302.261	0.89359	0.259496	3.44356	0.000574107	0.00260662
CNAG_01587	1742.85	-0.664988	0.193259	-3.44091	0.000579757	0.0026307
CNAG_02905	2421.34	-0.749058	0.217734	-3.44025	0.000581184	0.00263559
CNAG_04201	21.4547	1.76339	0.512723	3.43926	0.00058331	0.00264364
CNAG_05283	752.622	-0.623882	0.181436	-3.43858	0.000584783	0.00264872
CNAG_01297	335.303	0.704636	0.204955	3.438	0.000586032	0.00265279
CNAG_04839	1098.71	-0.551894	0.160581	-3.43686	0.000588493	0.00266233
CNAG_01535	1694.6	-0.524581	0.152703	-3.43531	0.000591882	0.00267606
CNAG_03084	327.746	2.02143	0.589149	3.43111	0.000601125	0.00271622
CNAG_02418	5705.91	-0.526126	0.15337	-3.43043	0.000602627	0.00272138
CNAG_00476	19.6372	1.90853	0.556737	3.42807	0.000607885	0.00274348
CNAG_03649	830.188	-0.571864	0.166869	-3.42702	0.000610246	0.00275249
CNAG_05501	81.1586	1.01869	0.297292	3.42656	0.000611268	0.00275545
CNAG_05823	296.109	-0.697927	0.203725	-3.42583	0.000612914	0.00276122
CNAG_00086	1510.31	-0.657405	0.191947	-3.42492	0.000614972	0.00276884
CNAG_03812	3658.23	-0.557468	0.162783	-3.4246	0.000615697	0.00277045
CNAG_05687	419.361	1.15819	0.33823	3.42426	0.000616471	0.00277228
CNAG_12731	39.2648	1.39546	0.407551	3.42401	0.000617035	0.00277317
CNAG_07637	3385.42	-0.76144	0.222448	-3.423	0.000619331	0.00278183
CNAG_05029	197.128	0.831838	0.243047	3.42254	0.0006204	0.00278497
CNAG_03193	24.0142	1.76544	0.515945	3.42176	0.000622183	0.00279131
CNAG_02345	143.933	0.977506	0.28569	3.42156	0.000622635	0.00279168
CNAG_12013	34.6719	1.38096	0.403674	3.42099	0.000623934	0.00279534
CNAG_01744	2914.54	-0.715463	0.209146	-3.42088	0.000624192	0.00279534
CNAG_02553	120.008	-0.861207	0.25179	-3.42034	0.000625431	0.00279923
CNAG_00504	1463.52	-0.628698	0.184013	-3.4166	0.000634082	0.00283572
CNAG_00125	84.1918	1.01525	0.297161	3.41649	0.000634336	0.00283572
CNAG_04210	662.436	0.682798	0.200159	3.41128	0.000646593	0.0028888
CNAG_01808	2625.29	-0.597531	0.175285	-3.40891	0.000652239	0.00291231
CNAG_04096	90.8303	0.972521	0.285412	3.40743	0.00065578	0.00292639
CNAG_03182	1225.66	-0.639746	0.18782	-3.40617	0.000658815	0.00293755
CNAG_01810	1156.7	-0.669418	0.196537	-3.40607	0.000659061	0.00293755
CNAG_04241	211.311	0.734163	0.215593	3.40532	0.000660864	0.0029424
CNAG_03670	743.384	0.725549	0.213065	3.40529	0.000660929	0.0029424
CNAG_02893	169.508	-1.0195	0.299439	-3.40471	0.000662349	0.00294698
CNAG_12045	29.7364	-1.51594	0.445299	-3.40432	0.000663297	0.00294947
CNAG_00508	806.707	0.54679	0.160652	3.40357	0.000665103	0.00295575
CNAG_00388	1153.16	0.549136	0.16139	3.40253	0.00066764	0.00296528
CNAG_04252	162.306	1.11832	0.328747	3.40177	0.000669498	0.00297178
CNAG_04414	518.016	0.57171	0.168093	3.40116	0.000671007	0.00297673
CNAG_05114	94.5765	0.911675	0.268279	3.39823	0.00067824	0.00300705
CNAG_02350	1059.58	-0.535289	0.157557	-3.39742	0.000680238	0.00301334
CNAG_00694	3095.21	-0.600245	0.176681	-3.39733	0.000680458	0.00301334
CNAG_05695	1372.48	0.598181	0.176107	3.39669	0.000682063	0.00301857
CNAG_05443	103.392	0.858913	0.252879	3.39654	0.000682439	0.00301857
CNAG_06283	811.636	-0.638341	0.187975	-3.39587	0.000684097	0.00302317
CNAG_00877	1108.06	-0.725699	0.213705	-3.3958	0.000684279	0.00302317
CNAG_04986	1441.43	-0.521632	0.153663	-3.39465	0.000687162	0.00303402
CNAG_07020	1925.96	-0.515169	0.151766	-3.3945	0.000687539	0.00303402
CNAG_04345	237.856	0.693364	0.204343	3.39314	0.000690973	0.00304739
CNAG_05360	1145.87	-0.790597	0.233127	-3.39127	0.000695706	0.00306647
CNAG_03155	548.097	0.715703	0.211087	3.39056	0.000697495	0.00307256
CNAG_07522	486.192	-0.592802	0.174868	-3.39	0.000698923	0.00307705
CNAG_05085	2066.08	-0.555207	0.163819	-3.38914	0.000701118	0.00308492
CNAG_12094	545.425	-0.826642	0.244255	-3.38433	0.00071351	0.00313761
CNAG_13140	101.025	0.957927	0.283122	3.38344	0.000715826	0.00314596
CNAG_02701	3675.63	2.06636	0.610799	3.38304	0.000716876	0.00314875
CNAG_04300	303.956	0.830934	0.24566	3.38245	0.00071842	0.00315369
CNAG_05252	1615.24	0.587574	0.173823	3.38031	0.000724045	0.00317654
CNAG_04761	524.596	-0.578017	0.171064	-3.37894	0.000727649	0.00318961
CNAG_07888	6453.5	-0.793853	0.234947	-3.37886	0.000727871	0.00318961
CNAG_04801	1464.2	0.737742	0.218364	3.3785	0.000728828	0.00319195
CNAG_04233	411.415	0.598037	0.177115	3.37655	0.000734004	0.00321276
CNAG_07669	1557.2	0.600457	0.17788	3.37562	0.000736497	0.0032218
CNAG_04185	82.1691	1.16797	0.346065	3.375	0.000738163	0.00322722
CNAG_03632	1342.51	-0.690311	0.204573	-3.37439	0.000739783	0.00323243
CNAG_04208	463.341	-0.684087	0.20275	-3.37405	0.000740717	0.00323304
CNAG_06130	881.87	-0.594517	0.176206	-3.37398	0.000740895	0.00323304
CNAG_00194	1836.55	-0.548183	0.162479	-3.37386	0.000741209	0.00323304
CNAG_06302	44.7073	1.28376	0.380583	3.37314	0.000743154	0.00323966
CNAG_07583	178.531	0.864596	0.256371	3.37243	0.000745068	0.00324612
CNAG_02465	200.912	0.698812	0.207264	3.3716	0.000747324	0.00325407
CNAG_00006	3191.83	-0.728915	0.21622	-3.37118	0.000748477	0.00325541
CNAG_05438	895.169	-0.680177	0.201763	-3.37117	0.000748494	0.00325541
CNAG_02993	708.539	-0.650729	0.193039	-3.37097	0.000749042	0.00325592
CNAG_01334	995.102	-0.860068	0.255175	-3.3705	0.000750323	0.00325961
CNAG_05848	3746.59	-0.557925	0.165546	-3.37022	0.000751088	0.00326105
CNAG_06699	42473.2	-0.645248	0.191687	-3.36616	0.00076222	0.00330748
CNAG_01352	507.528	0.839114	0.249304	3.36582	0.000763163	0.00330967
CNAG_07994	258.193	0.742079	0.220538	3.36485	0.000765848	0.00331941
CNAG_06823	20.1405	1.7444	0.518492	3.36438	0.000767168	0.00332322
CNAG_07904	930.082	-0.846028	0.251487	-3.3641	0.000767926	0.0033246
CNAG_07746	4258.97	-0.658234	0.195736	-3.36287	0.000771357	0.00333753
CNAG_12944	125.351	0.919012	0.273355	3.36197	0.000773887	0.00334656
CNAG_04939	750.291	-0.558011	0.166104	-3.35941	0.000781094	0.0033742
CNAG_07972	163.408	0.92018	0.273913	3.35938	0.000781172	0.0033742
CNAG_04293	284.77	0.716125	0.21323	3.35847	0.000783765	0.00338346
CNAG_03859	1270.93	-0.567156	0.169069	-3.35458	0.000794862	0.00342941
CNAG_06056	564.768	-0.675272	0.201365	-3.35347	0.000798044	0.00344116
CNAG_00159	578.741	-0.751779	0.22419	-3.35331	0.000798517	0.00344124
CNAG_00822	4078.44	-0.64178	0.191423	-3.35268	0.000800342	0.00344714
CNAG_00120	868.851	-0.675173	0.201448	-3.3516	0.000803453	0.00345856
CNAG_04244	705.221	0.597555	0.178349	3.35048	0.000806716	0.00347063
CNAG_13168	111.776	0.829459	0.247704	3.3486	0.000812224	0.00349233
CNAG_01338	348.2	0.675083	0.201657	3.34768	0.000814902	0.00350185
CNAG_03541	1674.55	-0.601187	0.179606	-3.34726	0.000816156	0.00350525
CNAG_01444	1182.91	-0.6916	0.206672	-3.34637	0.000818757	0.00351442
CNAG_03572	524.768	1.0491	0.313558	3.34578	0.000820519	0.00351998
CNAG_00783	857.06	-0.681029	0.20359	-3.3451	0.000822543	0.00352665
CNAG_00136	4158.39	0.648427	0.193855	3.34491	0.000823103	0.00352705
CNAG_01254	351.838	0.718134	0.214876	3.34208	0.000831525	0.00356011
CNAG_07599	515.854	0.621662	0.186015	3.342	0.00083176	0.00356011
CNAG_06127	2842.46	-0.537592	0.160926	-3.34063	0.000835897	0.00357578
CNAG_07941	3392.65	-0.608308	0.182103	-3.34046	0.000836411	0.00357596
CNAG_03490	522.662	0.731744	0.21909	3.33993	0.000837989	0.00358067
CNAG_05118	1064.84	-0.595741	0.178437	-3.33867	0.000841811	0.00359497
CNAG_02069	212.818	-0.931179	0.278936	-3.33833	0.000842833	0.0035973
CNAG_01494	267.119	0.695346	0.208394	3.3367	0.000847807	0.00361648
CNAG_06836	114.334	0.848491	0.25437	3.33565	0.000850997	0.00362803
CNAG_05631	8398.46	-0.656248	0.196751	-3.33543	0.000851691	0.00362894
CNAG_06214	553.412	-0.631291	0.189279	-3.33525	0.000852231	0.0036292
CNAG_01560	123.458	0.84178	0.252469	3.33419	0.000855484	0.003641
CNAG_03185	671.814	0.626679	0.188018	3.33307	0.000858918	0.00365355
CNAG_07659	1331.74	0.610562	0.18332	3.33059	0.000866636	0.0036843
CNAG_06235	411.96	-0.581627	0.174665	-3.32995	0.000868608	0.00369061
CNAG_00496	364.969	0.817604	0.245936	3.32446	0.000885889	0.00376191
CNAG_02363	74.5822	1.05543	0.317676	3.32235	0.000892616	0.00378666
CNAG_04896	1458.27	-0.504998	0.152002	-3.32232	0.000892719	0.00378666
CNAG_03869	408.152	0.584463	0.17596	3.32157	0.00089513	0.00379475
CNAG_02679	378.009	-0.607076	0.182785	-3.32126	0.00089612	0.00379681
CNAG_12060	162.61	0.92047	0.277289	3.31953	0.000901693	0.00381762
CNAG_02259	309.466	0.699632	0.210769	3.31942	0.000902043	0.00381762
CNAG_04384	1400.63	-0.556383	0.167644	-3.31883	0.000903944	0.00382352
CNAG_01641	2112.43	-0.620829	0.187088	-3.31839	0.000905392	0.0038275
CNAG_00062	3870.56	0.687073	0.207097	3.31765	0.000907795	0.00383375
CNAG_06543	3565.66	-0.56603	0.170613	-3.31762	0.000907886	0.00383375
CNAG_05731	1002.27	0.546839	0.164862	3.31694	0.00091009	0.0038409
CNAG_03962	591.583	0.872941	0.26323	3.31627	0.000912275	0.00384798
CNAG_01384	62.3381	1.04088	0.313895	3.31601	0.00091312	0.00384939
CNAG_06792	814.031	0.6728	0.202996	3.31436	0.000918546	0.0038701
CNAG_04147	1144.71	-0.614963	0.185643	-3.3126	0.00092432	0.00389225
CNAG_04679	1666.41	-0.652544	0.197039	-3.31175	0.000927134	0.00390193
CNAG_01347	1590.36	0.630245	0.190385	3.31036	0.000931745	0.00391915
CNAG_04823	1168.57	-0.607308	0.183742	-3.30522	0.000949016	0.00398957
CNAG_12216	143.077	-0.889784	0.269237	-3.30484	0.000950301	0.00399275
CNAG_04461	35.0219	1.32678	0.401531	3.30429	0.000952165	0.00399835
CNAG_01993	143.996	-0.938788	0.284246	-3.30273	0.000957494	0.00401809
CNAG_01136	1049.42	-0.606406	0.183615	-3.3026	0.00095793	0.00401809
CNAG_04054	641.535	-0.672336	0.203635	-3.30167	0.000961105	0.00402917
CNAG_12666	140.876	-1.12175	0.339771	-3.30148	0.000961773	0.00402973
CNAG_00567	965.67	-0.531007	0.160893	-3.30037	0.000965562	0.00404336
CNAG_01561	1009.7	0.500659	0.151741	3.29942	0.000968845	0.00405486
CNAG_02062	366.83	0.652014	0.197643	3.29895	0.000970456	0.00405935
CNAG_03222	38.0634	1.6026	0.485981	3.29767	0.000974901	0.00407568
CNAG_06126	1637.37	-0.65295	0.198117	-3.29578	0.000981492	0.00410038
CNAG_06396	238.94	2.65117	0.804441	3.29566	0.000981897	0.00410038
CNAG_04864	1461.28	-0.642629	0.195053	-3.29464	0.000985479	0.00411307
CNAG_01712	1223.04	-0.609818	0.185104	-3.29446	0.000986097	0.00411337
CNAG_07311	703.119	-0.683911	0.207618	-3.29408	0.000987442	0.00411671
CNAG_04656	475.565	-0.614218	0.186537	-3.29274	0.000992176	0.00413416
CNAG_03606	1917.28	-0.577546	0.175427	-3.29223	0.000993969	0.00413935
CNAG_06186	178.053	0.736682	0.223826	3.29132	0.000997194	0.00415048
CNAG_06795	2066.08	-0.865286	0.262988	-3.29021	0.00100112	0.00416453
CNAG_03857	4650.7	0.670816	0.203911	3.28976	0.00100275	0.00416899
CNAG_07699	575.81	0.62686	0.190604	3.28881	0.00100612	0.0041807
CNAG_05262	1571.81	-0.729024	0.221711	-3.28818	0.00100837	0.00418776
CNAG_01178	651.763	0.630451	0.191805	3.28694	0.00101281	0.00420387
CNAG_03055	1097.47	-0.87717	0.267106	-3.28398	0.00102352	0.00424601
CNAG_03108	571.923	0.662189	0.201659	3.2837	0.00102454	0.0042479
CNAG_12175	26.9645	-1.41604	0.431329	-3.28296	0.00102724	0.00425676
CNAG_05201	126.418	0.779259	0.2374	3.28248	0.001029	0.00426171
CNAG_12379	30.082	1.47314	0.449371	3.27823	0.0010446	0.00432396
CNAG_03009	717.94	-0.678852	0.207121	-3.27756	0.00104707	0.00433181
CNAG_01096	466.657	-0.570131	0.173959	-3.2774	0.00104769	0.00433199
CNAG_12987	179.597	-0.806489	0.246174	-3.27609	0.00105256	0.00434972
CNAG_01656	351.145	-0.863484	0.26359	-3.27586	0.00105339	0.00435033
CNAG_00407	1618.5	0.899804	0.274687	3.27574	0.00105386	0.00435033
CNAG_01351	1367.36	-0.537782	0.16424	-3.27437	0.00105898	0.00436908
CNAG_07927	636.452	-0.707256	0.216064	-3.27336	0.00106279	0.0043824
CNAG_05172	1845.67	0.617725	0.18873	3.27306	0.0010639	0.00438459
CNAG_01358	70.2253	1.00045	0.305866	3.27088	0.00107212	0.00441605
CNAG_12629	63.0894	1.0607	0.324332	3.27041	0.00107391	0.00442104
CNAG_04510	1527.91	-0.602651	0.184355	-3.26897	0.00107939	0.00444118
CNAG_02131	1085.12	-0.576348	0.176387	-3.26753	0.00108491	0.00446145
CNAG_05462	9292.51	-0.744865	0.228003	-3.26691	0.00108728	0.00446874
CNAG_05166	2047	-0.571422	0.17502	-3.26489	0.00109505	0.00449824
CNAG_06934	440.565	0.589288	0.180551	3.26384	0.00109914	0.00451256
CNAG_00451	373.439	-0.578093	0.177141	-3.26346	0.00110059	0.00451609
CNAG_05502	641.123	0.690113	0.211482	3.26323	0.0011015	0.00451735
CNAG_06867	287.545	0.634233	0.194371	3.263	0.00110239	0.00451854
CNAG_01058	994.365	-0.596505	0.182833	-3.26258	0.00110404	0.00452286
CNAG_05870	62.9176	1.03212	0.316393	3.26213	0.00110577	0.00452747
CNAG_02665	153.617	0.944342	0.289656	3.26022	0.00111325	0.00455565
CNAG_03384	73.1594	0.960055	0.29458	3.25906	0.00111781	0.0045718
CNAG_00925	118.808	0.832695	0.25552	3.25882	0.00111875	0.0045732
CNAG_03546	24.8906	1.72279	0.529251	3.25514	0.00113336	0.00463039
CNAG_03602	10714.2	-0.656526	0.201739	-3.25434	0.00113656	0.00464095
CNAG_00317	819.841	-0.573942	0.17642	-3.25327	0.00114084	0.0046559
CNAG_04820	1820.71	-0.625837	0.192447	-3.252	0.00114598	0.00467436
CNAG_12482	45.5116	-1.09784	0.337625	-3.25166	0.00114733	0.00467732
CNAG_04800	4689.42	-0.59005	0.181515	-3.25069	0.00115126	0.00469082
CNAG_05912	346.202	0.616064	0.189539	3.25032	0.00115274	0.00469208
CNAG_03114	1032.35	0.931003	0.286435	3.25031	0.00115281	0.00469208
CNAG_01651	27.7797	1.57016	0.483177	3.24966	0.00115543	0.00470018
CNAG_06327	1228.92	-0.699409	0.215314	-3.24832	0.00116088	0.00471984
CNAG_00554	319.171	0.648384	0.199628	3.24796	0.00116234	0.00472322
CNAG_00497	778.643	0.574335	0.176889	3.24687	0.00116681	0.00473884
CNAG_05990	167.495	0.789171	0.24308	3.24655	0.00116812	0.00474162
CNAG_01267	554.607	-0.637048	0.196351	-3.24444	0.00117681	0.00477285
CNAG_00139	2056.19	1.02819	0.316916	3.24438	0.00117708	0.00477285
CNAG_02344	178.36	0.827041	0.254963	3.24376	0.00117961	0.00478053
CNAG_01633	178.348	0.861568	0.265641	3.24335	0.00118132	0.0047849
CNAG_04081	348.926	-0.600828	0.185337	-3.24182	0.00118771	0.00480817
CNAG_01038	178.224	0.929224	0.286659	3.24156	0.00118876	0.00480986
CNAG_02739	1719.33	-0.479331	0.147883	-3.24128	0.00118994	0.00481203
CNAG_05392	204.325	0.764681	0.235955	3.24079	0.00119199	0.00481776
CNAG_03001	2207.58	-0.66528	0.205313	-3.24032	0.00119394	0.00482305
CNAG_04999	289.1	-0.604169	0.186472	-3.24	0.0011953	0.00482597
CNAG_04713	459.065	0.761066	0.234923	3.23963	0.00119684	0.00482959
CNAG_00864	13.1999	2.17992	0.67366	3.23593	0.00121249	0.00489013
CNAG_03660	815.656	-0.516146	0.159521	-3.2356	0.00121385	0.00489302
CNAG_12748	176.384	0.771631	0.238586	3.23418	0.00121993	0.00491488
CNAG_02664	2619.91	-0.492191	0.152274	-3.23227	0.00122809	0.00494489
CNAG_00423	426.712	-0.677883	0.209732	-3.23214	0.00122869	0.00494489
CNAG_04561	531.844	0.612313	0.189515	3.23096	0.00123376	0.00496267
CNAG_06240	9383.44	0.569789	0.176381	3.23044	0.00123598	0.00496894
CNAG_00359	1118.54	0.517855	0.160331	3.22991	0.00123831	0.00497564
CNAG_03354	1124.25	-0.697658	0.216099	-3.22841	0.00124479	0.00499902
CNAG_02682	308.888	0.668296	0.207033	3.22797	0.00124671	0.00500407
CNAG_04987	215.233	0.702413	0.217831	3.22458	0.00126157	0.0050595
CNAG_00436	659.632	0.628048	0.194775	3.22447	0.00126204	0.0050595
CNAG_02207	369.123	0.764309	0.237042	3.22436	0.00126253	0.0050595
CNAG_06535	2985.3	-0.581028	0.180361	-3.22147	0.00127533	0.00510808
CNAG_04600	390.224	0.674444	0.209507	3.2192	0.00128551	0.00514546
CNAG_07428	1421.23	-0.534079	0.165911	-3.21908	0.00128603	0.00514546
CNAG_04848	3827.97	-0.725196	0.225352	-3.21806	0.00129062	0.00516113
CNAG_06888	534.371	0.580375	0.180484	3.21566	0.00130147	0.00520174
CNAG_00937	23.041	1.63823	0.509511	3.2153	0.0013031	0.00520551
CNAG_05240	1856.36	-0.575265	0.178969	-3.21433	0.0013075	0.00521837
CNAG_05195	1256.44	0.518305	0.161251	3.21428	0.00130771	0.00521837
CNAG_03642	31.7406	1.49828	0.466177	3.21398	0.00130908	0.00522112
CNAG_00326	3507.25	-0.548497	0.170669	-3.21382	0.00130984	0.00522135
CNAG_00111	2173.18	-0.504191	0.156931	-3.21283	0.00131436	0.00523663
CNAG_01795	293.788	0.659433	0.20541	3.21032	0.00132586	0.00527965
CNAG_01165	431.69	0.641706	0.19992	3.20981	0.00132823	0.00528388
CNAG_07642	77.5914	0.951102	0.296317	3.20975	0.00132851	0.00528388
CNAG_02823	565.109	0.724417	0.2257	3.20964	0.00132902	0.00528388
CNAG_02530	2080.29	-0.623964	0.194426	-3.20926	0.00133076	0.005288
CNAG_01794	227.458	0.878341	0.273725	3.20884	0.00133271	0.00529296
CNAG_04898	67.4207	1.03756	0.323413	3.20815	0.00133591	0.0053029
CNAG_06809	657.016	0.523837	0.163301	3.20779	0.00133757	0.00530668
CNAG_04698	5209.78	-0.703657	0.219703	-3.20277	0.00136113	0.00539731
CNAG_01861	1668.06	0.784325	0.245084	3.20023	0.00137319	0.00544229
CNAG_05774	580.77	-0.61059	0.190952	-3.19761	0.0013857	0.00548898
CNAG_12368	195.002	0.734955	0.229861	3.19739	0.00138677	0.00549032
CNAG_04574	778.711	-0.581935	0.182026	-3.19698	0.00138873	0.00549522
CNAG_06363	1206.42	-0.689466	0.215707	-3.1963	0.00139201	0.0055053
CNAG_05312	697.038	-0.744456	0.232952	-3.19575	0.00139466	0.00551287
CNAG_03258	715.117	0.521138	0.163128	3.19465	0.00139999	0.00553104
CNAG_00996	1262.02	0.601263	0.188382	3.19173	0.00141425	0.00558143
CNAG_06754	3641.9	-0.561713	0.175992	-3.19169	0.00141441	0.00558143
CNAG_06316	4247.36	-0.658741	0.206399	-3.19158	0.00141496	0.00558143
CNAG_04774	803.998	0.556676	0.174557	3.18908	0.00142729	0.00562712
CNAG_02193	789.297	-0.595133	0.186638	-3.18871	0.00142912	0.00563139
CNAG_04585	249.978	0.856052	0.268844	3.1842	0.00145157	0.00571539
CNAG_03397	1657.43	0.756421	0.237561	3.18412	0.00145195	0.00571539
CNAG_04365	2320.21	-0.631676	0.198471	-3.18271	0.00145904	0.0057368
CNAG_13203	16.4178	1.86	0.584439	3.18254	0.00145991	0.0057368
CNAG_05351	6305.62	0.532448	0.167307	3.18246	0.0014603	0.0057368
CNAG_05394	520.724	0.564302	0.177318	3.18243	0.00146043	0.0057368
CNAG_00406	298.748	-0.654333	0.205719	-3.18072	0.0014691	0.00576636
CNAG_02143	431.809	0.628706	0.197666	3.18064	0.00146948	0.00576636
CNAG_05898	620.792	-0.668592	0.21024	-3.18013	0.00147207	0.00577352
CNAG_02023	88.0025	1.06891	0.336151	3.17987	0.00147342	0.00577582
CNAG_00506	956.663	-0.537385	0.169017	-3.17947	0.00147544	0.00577978
CNAG_01143	737.829	0.542557	0.170649	3.17937	0.00147597	0.00577978
CNAG_13010	213.194	0.868156	0.273096	3.17894	0.00147814	0.0057815
CNAG_01314	719.331	0.578896	0.182105	3.17891	0.00147831	0.0057815
CNAG_05238	119.114	0.908754	0.285877	3.17883	0.0014787	0.0057815
CNAG_00979	2912.8	4.39685	1.3841	3.17669	0.00148967	0.00582138
CNAG_06117	213.631	0.699371	0.22018	3.17636	0.00149134	0.0058247
CNAG_01733	6885.12	-0.555551	0.17491	-3.17622	0.00149207	0.0058247
CNAG_00440	229.139	0.719442	0.226582	3.1752	0.00149732	0.00584219
CNAG_01852	3319.61	-0.492554	0.15528	-3.17205	0.00151368	0.00590298
CNAG_01538	104.973	0.930162	0.293283	3.17155	0.00151626	0.00590998
CNAG_12862	45.8236	-1.16973	0.368926	-3.17064	0.00152101	0.00592543
CNAG_05366	6652.83	-0.511689	0.161423	-3.16986	0.00152511	0.00593831
CNAG_05684	613.364	0.728012	0.229818	3.16777	0.00153612	0.0059781
CNAG_04961	1644.45	-0.659706	0.208318	-3.16683	0.00154113	0.00599451
CNAG_07469	1006.6	-0.616084	0.194656	-3.16499	0.0015509	0.00602939
CNAG_01048	18.9986	1.68952	0.534285	3.1622	0.00156579	0.00608418
CNAG_13039	54.8338	1.05174	0.3328	3.16028	0.00157616	0.00612132
CNAG_04170	90.3073	1.16825	0.36985	3.15872	0.00158461	0.00615098
CNAG_00411	1475.98	-0.52639	0.166697	-3.15777	0.00158982	0.006168
CNAG_06553	400.375	0.661692	0.209576	3.15729	0.00159244	0.00617498
CNAG_05612	172.436	0.748546	0.237114	3.1569	0.00159455	0.00617999
CNAG_04462	207.948	0.647682	0.205186	3.15656	0.00159645	0.00618418
CNAG_03314	620.847	0.671646	0.212844	3.15558	0.00160177	0.00620161
CNAG_06361	3084.63	0.588524	0.186515	3.15537	0.00160296	0.00620305
CNAG_03647	1055.74	-0.495039	0.157044	-3.15222	0.00162032	0.006267
CNAG_03868	897.431	-0.559483	0.177508	-3.15187	0.00162227	0.0062702
CNAG_03045	598.288	-0.660478	0.209557	-3.15178	0.00162281	0.0062702
CNAG_04128	870.302	-0.537073	0.170566	-3.14877	0.00163957	0.00633172
CNAG_02025	1327.82	-0.520644	0.165458	-3.14668	0.00165138	0.00637406
CNAG_00752	116.536	1.07987	0.34321	3.14637	0.0016531	0.00637574
CNAG_02077	603.309	-0.518922	0.164932	-3.14628	0.0016536	0.00637574
[truncated: 6,381 more rows]

## Sheet: CSF_vs_YPD RNA-seq
	baseMean	log2FoldChange	lfcSE	stat	pvalue	padj
[truncated: 8,338 more rows]

[truncated: 1 more sheets: Macrophage_vs_YPD RNA-seq]
